# Supplementary material
Source: publisher figshare collection journal article supplement (https://acs.figshare.com/ndownloader/files/3760540)
Supplement: Supplementary file 1 [file 3760540]

## Sheet: Suppl_table_1_proteinGroups.txt
Protein IDs	Majority protein IDs	Protein names	Gene names	Number of proteins	Peptides	Unique peptides	Sequence coverage [%]	Mol. weight [kDa]	Sequence length	PEP	Ratio M/L	Ratio M/L normalized	Ratio M/L variability [%]	Ratio M/L count	Ratio H/L	Ratio H/L normalized	Ratio H/L variability [%]	Ratio H/L count	Ratio H/M	Ratio H/M normalized	Ratio H/M variability [%]	Ratio H/M count
A0AVF1;Q8BS45	A0AVF1;Q8BS45	Tetratricopeptide repeat protein 26	TTC26;Ttc26	2	2	2	4.7	64177	554	0.00012611	NaN	NaN	NaN	0	NaN	NaN	NaN	0	NaN	NaN	NaN	0
A0AVT1;Q8C7R4	A0AVT1	Ubiquitin-like modifier-activating enzyme 6	UBA6	2	21	21	24.7	117.97	1052	5.27E-49	19364	19481	25128	18	17141	1852	36497	18	0.95116	10298	21173	18
A0FGR8;Q3TZZ7	A0FGR8	Extended synaptotagmin-2	ESYT2	2	9	9	13.2	102.36	921	3.60E-31	0.58954	0.57054	47187	4	0.63271	0.59285	42138	4	10697	10793	16736	4
Q8C1S0;A0JLT2	Q8C1S0;A0JLT2	Mediator of RNA polymerase II transcription subunit 19	Med19;MED19	2	3	3	27	26263	244	9.43E-32	0.47434	0.46335	88849	2	0.54275	0.66117	64488	2	0.95017	11063	15575	2
A0JNW5	A0JNW5	UHRF1-binding protein 1-like	UHRF1BP1L	1	2	2	1.8	164.2	1464	2.80E-07	0.44876	0.80769	68206	2	0.34032	0.7179	12.9	2	0.76972	0.88321	14.43	2
A0MZ66	A0MZ66	Shootin-1	KIAA1598	1	25	16	43.4	71639	631	5.89E-179	16157	23497	31593	30	14849	20312	40386	30	0.83959	0.91252	19585	30
A0PJW6;Q9CQE2	A0PJW6;Q9CQE2	Transmembrane protein 223	TMEM223;Tmem223	2	2	2	7.9	22049	202	0.00020771	0.62314	0.53792	64871	2	NaN	NaN	NaN	1	0.78112	0.82126	60539	2
A1L020	A1L020	RNA-binding protein MEX3A	MEX3A	1	1	1	4.4	54173	520	5.51E-05	NaN	NaN	NaN	0	NaN	NaN	NaN	0	NaN	NaN	NaN	0
A1L0T0;Q8BU33	A1L0T0	Acetolactate synthase-like protein	ILVBL	2	16	16	34	67867	632	1.89E-85	0.43835	0.66369	54653	17	0.71121	0.80399	64129	17	13715	14474	39341	17
A1L390;Q4VAC9	A1L390;Q4VAC9	Pleckstrin homology domain-containing family G member 3	PLEKHG3;Plekhg3	2	6	6	6.8	134.41	1219	8.27E-15	0.84154	11498	11809	2	0.71582	0.88925	10771	2	12376	1.26	34521	2
A1X283;A2AAY5;O89032	A1X283	SH3 and PX domain-containing protein 2B	SH3PXD2B	3	26	24	32.3	101.58	911	1.42E-97	16433	21815	32436	35	13178	18915	28.08	35	0.86613	0.93206	20.91	35
Q14562;A2A4P0	Q14562;A2A4P0	ATP-dependent RNA helicase DHX8	DHX8;Dhx8	2	14	13	15.6	139.31	1220	4.25E-65	0.46143	0.66488	24731	5	0.43203	0.76842	54357	5	0.97208	10726	29145	5
A2A8Z1	A2A8Z1	Oxysterol-binding protein-related protein 9	Osbpl9	1	12	2	18.2	83108	736	2.85E-33	15661	16438	29416	9	12318	16744	41678	9	0.86589	0.98067	27853	9
A2A9C3;Q5T011	A2A9C3;Q5T011	Protein SZT2	Szt2;SZT2	2	2	2	0.7	377.62	3431	6.22E-05	NaN	NaN	NaN	0	NaN	NaN	NaN	0	NaN	NaN	NaN	0
O60244;A2ABV5	O60244;A2ABV5	Mediator of RNA polymerase II transcription subunit 14	MED14;Med14	2	9	9	7.5	160.6	1454	6.25E-22	0.44204	0.4319	22651	4	0.40912	0.46143	34977	4	0.97925	10284	14312	4
A2ADY9	A2ADY9	Protein DDI1 homolog 2	Ddi2	1	6	2	20.6	44.59	399	2.48E-18	24375	20941	42836	4	18616	20055	33381	4	0.94078	0.99584	10998	4
Q93074;A2AGH6	Q93074;A2AGH6	Mediator of RNA polymerase II transcription subunit 12	MED12;Med12	2	5	5	3.6	243.08	2177	1.27E-16	NaN	NaN	NaN	1	NaN	NaN	NaN	1	NaN	NaN	NaN	1
Q9C0C7;A2AH22	Q9C0C7;A2AH22	Activating molecule in BECN1-regulated autophagy protein 1	AMBRA1;Ambra1	2	2	2	2.5	142.51	1298	5.68E-13	NaN	NaN	NaN	1	NaN	NaN	NaN	1	NaN	NaN	NaN	1
A2AMZ4;A1L188	A2AMZ4;A1L188	Uncharacterized protein C17orf89 homolog;Uncharacterized protein C17orf89	C17orf89	2	2	2	24.3	77849	74	8.44E-06	NaN	NaN	NaN	0	NaN	NaN	NaN	0	NaN	NaN	NaN	0
A2AN08	A2AN08	E3 ubiquitin-protein ligase UBR4	Ubr4	1	33	1	7.7	572.28	5180	1.01E-123	NaN	NaN	NaN	0	NaN	NaN	NaN	0	NaN	NaN	NaN	0
A2APV2;Q96PY5	A2APV2;Q96PY5	Formin-like protein 2	Fmnl2;FMNL2	2	5	4	4.1	123.1	1086	1.93E-11	1286	18459	32343	2	12701	19966	19826	2	0.96996	0.92567	31475	2
A2AQ07	A2AQ07	Tubulin beta-1 chain	Tubb1	1	5	1	13.5	50.44	451	2.77E-20	NaN	NaN	NaN	0	NaN	NaN	NaN	0	NaN	NaN	NaN	0
A2AR02;Q13427	A2AR02;Q13427	Peptidyl-prolyl cis-trans isomerase G	Ppig;PPIG	2	6	6	9.8	88324	752	4.64E-22	0.70504	0.96262	26146	4	0.55111	0.82732	41542	4	0.81351	0.90425	10.67	4
A2ASQ1	A2ASQ1	Agrin;Agrin N-terminal 110 kDa subunit;Agrin C-terminal 110 kDa subunit;Agrin C-terminal 90 kDa fragment;Agrin C-terminal 22 kDa fragment	Agrn	1	7	2	3.6	207.54	1950	1.09E-26	NaN	NaN	NaN	1	NaN	NaN	NaN	1	NaN	NaN	NaN	1
A2ASS6	A2ASS6	Titin	Ttn	1	189	111	8.3	3906.4	35213	0	0.81177	0.99803	13407	3	0.92025	10934	112.71	3	1842	20202	157.02	3
A2AWA9;Q9Y3P9;B7ZAP0	A2AWA9;Q9Y3P9	Rab GTPase-activating protein 1	Rabgap1;RABGAP1	3	8	7	9.3	120.8	1064	5.60E-20	0.72063	14446	23934	4	0.88019	17487	16377	4	12619	12291	24064	4
O95396;A2BDX3	O95396;A2BDX3	Adenylyltransferase and sulfurtransferase MOCS3;Molybdopterin-synthase adenylyltransferase;Molybdopterin-synthase sulfurtransferase	MOCS3;Mocs3	2	2	2	6.7	49669	460	9.03E-06	15887	23289	22113	2	1293	16743	81203	2	0.78979	0.75298	42085	2
A2RRP1	A2RRP1	Neuroblastoma-amplified sequence	NBAS	1	6	6	3.3	268.57	2371	5.09E-14	0.74522	0.63484	11864	3	0.63487	0.6613	57902	3	0.866	0.98907	17218	3
A2RSY1;Q9P2N6	A2RSY1;Q9P2N6	KAT8 regulatory NSL complex subunit 3	Kansl3;KANSL3	2	2	2	3.4	96134	903	7.77E-06	0.49058	0.94697	46747	2	0.49245	0.7926	16618	2	1297	11297	23475	2
A2RTL5;Q7L4I2	A2RTL5;Q7L4I2	Arginine/serine-rich coiled-coil protein 2	Rsrc2;RSRC2	2	3	3	13	43876	376	1.13E-53	NaN	NaN	NaN	0	NaN	NaN	NaN	0	NaN	NaN	NaN	0
A2RU67	A2RU67	Uncharacterized protein KIAA1467	KIAA1467	1	3	3	5.6	67038	622	3.85E-06	NaN	NaN	NaN	0	NaN	NaN	NaN	0	NaN	NaN	NaN	0
A3KGS3;Q2PPJ7	A3KGS3;Q2PPJ7	Ral GTPase-activating protein subunit alpha-2	Ralgapa2;RALGAPA2	2	2	2	1.1	210.29	1872	1.49E-05	NaN	NaN	NaN	1	NaN	NaN	NaN	1	NaN	NaN	NaN	1
A3KMH1;Q8CC88	A3KMH1	von Willebrand factor A domain-containing protein 8	VWA8	2	19	19	13.9	214.82	1905	2.40E-60	0.83516	0.84788	30669	15	0.82461	0.82856	47692	16	0.96467	11073	36149	16
A3KN83;Q689Z5;Q7TNB8;Q9Y2G9	A3KN83;Q689Z5	Protein strawberry notch homolog 1	SBNO1;Sbno1	4	3	3	3	154.31	1393	2.69E-07	0.23753	0.45893	104.35	2	0.22512	0.42345	113.31	2	0.97246	0.87199	0.51355	2
A4D1E9;Q8K013	A4D1E9	GTP-binding protein 10	GTPBP10	2	5	5	19.1	42932	387	5.72E-30	0.51838	0.53587	18601	8	0.55177	0.61586	18622	8	0.95758	10571	11.88	8
A4D1P6	A4D1P6	WD repeat-containing protein 91	WDR91	1	11	7	17.3	83343	747	2.99E-27	17653	15052	25055	9	1274	10857	28166	9	0.77748	0.83724	26049	9
A5PLL7	A5PLL7	Transmembrane protein 189	TMEM189	1	2	1	8.5	31135	270	1.05E-14	NaN	NaN	NaN	0	NaN	NaN	NaN	0	NaN	NaN	NaN	0
Q3TIR1;A5PLN9	Q3TIR1;A5PLN9	Trafficking protein particle complex subunit 13	Trappc13;TRAPPC13	2	3	3	11.5	46476	417	1.64E-11	16483	15743	51917	3	12986	17262	12676	3	0.87885	10951	18056	3
A5YKK6;Q6ZQ08	A5YKK6;Q6ZQ08	CCR4-NOT transcription complex subunit 1	CNOT1;Cnot1	2	37	37	19.1	266.94	2376	4.09E-130	0.56687	0.98547	18221	17	0.63902	0.96906	35213	17	11148	0.9787	31906	17
A6H5X4	A6H5X4	PHD finger protein 11	Phf11	1	2	2	11.3	37728	337	4.76E-12	NaN	NaN	NaN	0	NaN	NaN	NaN	0	NaN	NaN	NaN	0
A6H5Z3;Q9Y2D4	A6H5Z3;Q9Y2D4	Exocyst complex component 6B	Exoc6b;EXOC6B	2	4	3	6.3	94128	810	2.36E-16	0.57208	0.72999	61152	2	0.75344	10595	50617	2	12225	12091	0.0049707	2
Q9GZQ8;A6NCE7;Q9CQV6;Q9H492;Q91VR7	Q9GZQ8;A6NCE7;Q9CQV6	Microtubule-associated proteins 1A/1B light chain 3B;Microtubule-associated proteins 1A/1B light chain 3 beta 2	MAP1LC3B;MAP1LC3B2;Map1lc3b	5	3	3	24.8	14688	125	6.53E-08	0.321	0.44051	50267	6	0.36523	0.51702	30469	6	0.96847	10254	23344	6
A6NDG6;Q8CHP8	A6NDG6	Phosphoglycolate phosphatase	PGP	2	11	11	43.6	34006	321	2.67E-41	0.89358	14181	25665	12	0.93017	1435	44.37	12	0.8844	0.93816	33065	12
A6NDU8	A6NDU8	UPF0600 protein C5orf51	C5orf51	1	4	4	21.8	33.62	294	1.28E-10	NaN	NaN	NaN	1	NaN	NaN	NaN	1	NaN	NaN	NaN	1
A6NFI3	A6NFI3	Zinc finger protein 316	ZNF316	1	1	1	2.3	108.44	1004	0.00070235	0.33325	0.47784	73325	2	0.39301	0.54088	77906	2	12709	12414	9738	2
A6NGB9	A6NGB9	WAS/WASL-interacting protein family member 3	WIPF3	1	5	5	18.2	49348	483	3.18E-20	1621	3028	15811	5	18959	3076	12419	5	11396	10839	10501	5
A6NGZ7;Q9H1C4	A6NGZ7;Q9H1C4	Putative protein unc-93 homolog B1-like protein;Protein unc-93 homolog B1	UNC93B1	2	1	1	6.8	27223	249	3.30E-06	0.92766	10794	7129	2	0.9899	11627	76952	2	10445	1.15	0.12299	2
A6NHR9	A6NHR9	Structural maintenance of chromosomes flexible hinge domain-containing protein 1	SMCHD1	1	26	20	18.2	226.37	2005	6.03E-100	0.6198	0.67135	20985	18	0.49342	0.58996	30481	18	0.82012	0.99049	30.03	18
A6NIH7;Q8C4B4;Q9Z2R6;Q13432	A6NIH7;Q8C4B4	Protein unc-119 homolog B	UNC119B;Unc119b	4	3	3	18.7	28136	251	2.14E-10	12139	16812	77901	4	10372	14092	87183	4	0.98938	10482	10206	4
A6NJ78;Q9DCL4	A6NJ78;Q9DCL4	Probable methyltransferase-like protein 15	METTL15;Mettl15	2	2	2	7.1	46121	407	6.04E-05	NaN	NaN	NaN	1	NaN	NaN	NaN	1	NaN	NaN	NaN	1
A6NKT7;Q7Z3J3	A6NKT7;Q7Z3J3	RanBP2-like and GRIP domain-containing protein 3;RanBP2-like and GRIP domain-containing protein 4	RGPD3;RGPD4	2	25	1	18.2	197.48	1758	2.78E-85	0.71603	0.72489	47507	4	0.30314	0.44068	51431	3	0.57656	0.68127	21032	4
A6NL28	A6NL28	Putative tropomyosin alpha-3 chain-like protein		1	4	3	14.8	26269	223	1.87E-51	20343	19958	15852	21	17111	19585	17943	21	10116	0.94473	14494	21
A6ZKI3;Q9BWD3;Q17RB0	A6ZKI3;Q9BWD3	Protein FAM127A;Protein FAM127B	FAM127A;FAM127B	3	3	3	34.5	13171	113	8.37E-11	16631	17739	10017	4	16635	18222	35.79	4	10161	10916	13391	4
A7E2V4;Q3UHH1	A7E2V4;Q3UHH1	Zinc finger SWIM domain-containing protein 8	ZSWIM8;Zswim8	2	5	5	5.4	197.3	1837	5.86E-14	10397	14068	23949	4	11715	16985	38824	4	10003	11451	18731	4
A8MPP1;Q96FC9;Q6AXC6;Q92771	A8MPP1;Q96FC9;Q6AXC6;Q92771	Putative ATP-dependent RNA helicase DDX11-like protein 8;Probable ATP-dependent RNA helicase DDX11;Putative ATP-dependent RNA helicase DDX12	DDX11L8;DDX11;Ddx11;DDX12P	4	2	2	3.3	101.81	907	1.07E-05	0.91162	13132	18586	2	11355	15349	29205	2	13908	14067	26068	2
A8MW92	A8MW92	PHD finger protein 20-like protein 1	PHF20L1	1	2	2	2.8	115.01	1017	6.82E-06	NaN	NaN	NaN	1	NaN	NaN	NaN	1	NaN	NaN	NaN	1
P62309;P62308;A8MWD9	P62309;P62308;A8MWD9	Small nuclear ribonucleoprotein G;Small nuclear ribonucleoprotein G-like protein	Snrpg;SNRPG	3	3	3	26.3	8496	76	7.53E-12	0.44872	0.77559	11947	2	0.46161	0.66826	67928	2	10656	0.99969	12236	2
A8MXT2	A8MXT2	Melanoma-associated antigen B17	MAGEB17	1	1	1	4.2	51127	457	0.00065797	NaN	NaN	NaN	0	NaN	NaN	NaN	0	NaN	NaN	NaN	0
A8MXV4	A8MXV4	Nucleoside diphosphate-linked moiety X motif 19, mitochondrial	NUDT19	1	3	3	9.9	42233	375	1.32E-07	10209	12234	45244	4	11309	1.04	68063	4	0.93312	10705	23863	4
B0V2N1;Q64487;P23468	B0V2N1	Receptor-type tyrosine-protein phosphatase S	Ptprs	3	8	2	7.3	211.9	1907	4.60E-27	NaN	NaN	NaN	0	NaN	NaN	NaN	0	NaN	NaN	NaN	0
B1AJZ9	B1AJZ9	Forkhead-associated domain-containing protein 1	FHAD1	1	1	1	1.1	161.9	1412	0.068277	NaN	NaN	NaN	1	NaN	NaN	NaN	1	NaN	NaN	NaN	1
B1AY10;Q12986	B1AY10;Q12986	Transcriptional repressor NF-X1	Nfx1;NFX1	2	1	1	0.9	123.81	1114	0.0010739	NaN	NaN	NaN	0	NaN	NaN	NaN	0	NaN	NaN	NaN	0
B1AZA5	B1AZA5	Transmembrane protein 245	Tmem245	1	3	1	3.3	97356	876	1.54E-15	NaN	NaN	NaN	1	NaN	NaN	NaN	1	NaN	NaN	NaN	1
Q9H9J4;B2RQC2	Q9H9J4;B2RQC2	Ubiquitin carboxyl-terminal hydrolase 42	USP42;Usp42	2	1	1	1.5	145.39	1324	1.76E-10	NaN	NaN	NaN	0	NaN	NaN	NaN	0	NaN	NaN	NaN	0
Q9H6S0;B2RR83	Q9H6S0;B2RR83	Probable ATP-dependent RNA helicase YTHDC2	YTHDC2;Ythdc2	2	4	4	3.2	160.25	1430	9.04E-10	NaN	NaN	NaN	1	NaN	NaN	NaN	1	NaN	NaN	NaN	1
P63096;B2RSH2	P63096;B2RSH2	Guanine nucleotide-binding protein G(i) subunit alpha-1	GNAI1;Gnai1	2	9	4	31.1	40361	354	2.21E-41	NaN	NaN	NaN	0	NaN	NaN	NaN	0	NaN	NaN	NaN	0
Q7Z392;B2RXC1	Q7Z392;B2RXC1	Trafficking protein particle complex subunit 11	TRAPPC11;Trappc11	2	4	4	4.9	128.88	1133	2.41E-11	19743	1944	17188	4	15947	18217	13.64	4	0.82763	0.90655	18976	4
B2RXS4	B2RXS4	Plexin-B2	Plxnb2	1	13	4	8.9	206.23	1842	1.34E-40	NaN	NaN	NaN	0	NaN	NaN	NaN	0	NaN	NaN	NaN	0
C4AMC7;Q6VEQ5;A8K0Z3;Q9NQA3;Q8VDD8;A8MWX3	C4AMC7;Q6VEQ5;A8K0Z3;Q9NQA3	Putative WAS protein family homolog 3;WAS protein family homolog 2;WAS protein family homolog 1;WAS protein family homolog 6	WASH3P;WASH2P;WASH1;WASH6P	6	4	4	15.1	49994	463	1.91E-10	0.64305	13672	28083	5	0.6216	1052	32174	5	1003	10445	34217	5
C9JLW8;Q3UGS4	C9JLW8;Q3UGS4	Protein FAM195B	FAM195B;Fam195b	2	3	3	41.2	10.92	97	1.89E-10	0.56782	12143	27.29	5	0.85458	10374	66004	5	0.86123	0.87228	65963	5
CON__A2I7N1;CON__Q9TTE1;CON__A2I7N0	CON__A2I7N1;CON__Q9TTE1;CON__A2I7N0			3	4	3	9.2	46397	411	1.28E-10	NaN	NaN	NaN	0	NaN	NaN	NaN	0	NaN	NaN	NaN	0
CON__A2I7N3;CON__REFSEQ:XP_001252647	CON__A2I7N3;CON__REFSEQ:XP_001252647			2	4	3	6.7	46941	417	4.51E-09	NaN	NaN	NaN	0	NaN	NaN	NaN	0	NaN	NaN	NaN	0
CON__ENSEMBL:ENSBTAP00000007350;CON__P01030	CON__ENSEMBL:ENSBTAP00000007350;CON__P01030			2	10	5	6.8	192.99	1742	2.64E-28	NaN	NaN	NaN	0	NaN	NaN	NaN	0	NaN	NaN	NaN	0
CON__ENSEMBL:ENSBTAP00000018229;CON__Q3MHN5	CON__ENSEMBL:ENSBTAP00000018229;CON__Q3MHN5			2	7	7	22.1	53661	475	1.56E-18	NaN	NaN	NaN	0	NaN	NaN	NaN	0	NaN	NaN	NaN	0
CON__ENSEMBL:ENSBTAP00000024146	CON__ENSEMBL:ENSBTAP00000024146			1	35	29	30.5	164.34	1477	2.94E-161	NaN	NaN	NaN	1	NaN	NaN	NaN	1	NaN	NaN	NaN	1
CON__ENSEMBL:ENSBTAP00000032840	CON__ENSEMBL:ENSBTAP00000032840			1	32	29	46.9	92273	825	1.22E-194	0.47248	10038	29941	2	0.46287	0.81578	33353	2	1036	0.91239	46948	2
CON__ENSEMBL:ENSBTAP00000034412	CON__ENSEMBL:ENSBTAP00000034412			1	2	2	12.6	22336	199	2.10E-08	NaN	NaN	NaN	0	NaN	NaN	NaN	0	NaN	NaN	NaN	0
CON__ENSEMBL:ENSBTAP00000037665	CON__ENSEMBL:ENSBTAP00000037665			1	8	8	15.1	65.19	578	2.36E-23	NaN	NaN	NaN	0	NaN	NaN	NaN	0	NaN	NaN	NaN	0
CON__P00711	CON__P00711			1	2	2	22	14186	123	0.000128	NaN	NaN	NaN	0	NaN	NaN	NaN	0	NaN	NaN	NaN	0
CON__P00735	CON__P00735			1	7	1	15.2	70505	625	5.80E-19	NaN	NaN	NaN	0	NaN	NaN	NaN	0	NaN	NaN	NaN	0
CON__P00761	CON__P00761			1	5	5	25.1	24409	231	3.48E-58	0.80361	0.95422	31373	61	0.6776	0.81163	24697	60	0.8416	0.90474	22278	60
CON__P00978	CON__P00978			1	3	2	12.2	39234	352	6.34E-07	NaN	NaN	NaN	0	NaN	NaN	NaN	0	NaN	NaN	NaN	0
CON__Q2KJ62;CON__P01044-1;CON__P01045-1	CON__Q2KJ62;CON__P01044-1;CON__P01045-1			3	2	2	5.2	68964	621	1.17E-26	26013	19779	25.06	3	19724	19717	39958	3	0.79362	0.93919	6946	3
CON__P01966	CON__P01966			1	5	2	31.7	15184	142	1.07E-16	NaN	NaN	NaN	0	NaN	NaN	NaN	0	NaN	NaN	NaN	0
CON__P02070	CON__P02070			1	5	2	33.1	15954	145	1.41E-17	NaN	NaN	NaN	0	NaN	NaN	NaN	0	NaN	NaN	NaN	0
CON__P02662	CON__P02662			1	3	3	17.1	22975	199	8.54E-33	NaN	NaN	NaN	0	NaN	NaN	NaN	0	NaN	NaN	NaN	0
CON__P02666	CON__P02666			1	2	2	6.7	23583	209	8.92E-05	NaN	NaN	NaN	0	NaN	NaN	NaN	0	NaN	NaN	NaN	0
CON__P02672;P02671	CON__P02672			2	3	3	5	67011	615	5.69E-08	NaN	NaN	NaN	0	NaN	NaN	NaN	0	NaN	NaN	NaN	0
CON__P02754	CON__P02754			1	2	2	18.5	18281	162	1.01E-05	NaN	NaN	NaN	0	NaN	NaN	NaN	0	NaN	NaN	NaN	0
CON__P02769	CON__P02769			1	43	36	65.4	69293	607	2.00E-287	0.0099525	0.020868	139.83	9	0.0057327	0.010051	152.8	9	0.71978	0.60608	45251	9
CON__P04258	CON__P04258			1	3	3	2.8	138.44	1466	3.42E-22	NaN	NaN	NaN	0	NaN	NaN	NaN	0	NaN	NaN	NaN	0
P12035;CON__P12035;Q5XKE5;CON__Q5XKE5;Q01546;CON__Q01546	P12035;CON__P12035;Q5XKE5;CON__Q5XKE5;Q01546;CON__Q01546	Keratin, type II cytoskeletal 3;Keratin, type II cytoskeletal 79;Keratin, type II cytoskeletal 2 oral	KRT3;KRT79;KRT76	6	4	1	4.5	64416	628	4.08E-13	NaN	NaN	NaN	1	NaN	NaN	NaN	1	NaN	NaN	NaN	1
CON__P12763	CON__P12763			1	9	7	31.5	38418	359	8.01E-72	0.27691	0.32888	67637	6	0.54014	0.77277	26527	6	21626	26412	88728	6
P13645;CON__P13645;P02535;CON__P02535-1;CON__ENSEMBL:ENSP00000377550;P08730;CON__P08730-1;P13646;CON__P13646-1	P13645;CON__P13645	Keratin, type I cytoskeletal 10	KRT10	9	5	5	11	58826	584	3.52E-12	33365	70901	34697	2	38541	76985	50063	2	11102	10022	22165	2
CON__P15497;P02647	CON__P15497			2	17	15	57.7	30276	265	1.15E-76	41248	47968	46301	4	15233	21903	19888	4	38858	47308	11023	4
CON__P15636	CON__P15636			1	10	10	18.7	68124	653	1.56E-234	0.91172	10036	47281	80	0.90381	0.99755	43.14	80	0.99832	10193	22733	80
CON__P17690	CON__P17690			1	11	10	40.3	38252	345	3.12E-88	NaN	NaN	NaN	0	NaN	NaN	NaN	0	NaN	NaN	NaN	0
CON__P34955	CON__P34955			1	12	12	27.6	46103	416	1.71E-46	NaN	NaN	NaN	0	NaN	NaN	NaN	0	NaN	NaN	NaN	0
P35527;CON__P35527	P35527;CON__P35527	Keratin, type I cytoskeletal 9	KRT9	2	7	7	18.8	62064	623	1.16E-53	0.76542	0.74357	60259	2	16781	19809	10545	2	28534	33012	22.73	2
CON__P41361	CON__P41361			1	7	3	13.8	52347	465	3.46E-21	NaN	NaN	NaN	0	NaN	NaN	NaN	0	NaN	NaN	NaN	0
P60710;P60709;CON__P60712;P63261;P63260;Q562R1;Q9BYX7	P60710;P60709;CON__P60712;P63261;P63260	Actin, cytoplasmic 1;Actin, cytoplasmic 1, N-terminally processed;Actin, cytoplasmic 2;Actin, cytoplasmic 2, N-terminally processed	Actb;ACTB;ACTG1;Actg1	7	29	8	81.6	41736	375	0	19046	17798	32097	355	14496	15937	41755	353	0.83094	0.89628	31749	354
Q8N339;P80297;P04732;P02798;P02795;CON__P67983;P13640	Q8N339;P80297;P04732;P02798;P02795;CON__P67983;P13640	Metallothionein-1M;Metallothionein-1X;Metallothionein-1E;Metallothionein-2;Metallothionein-1G	MT1M;MT1X;MT1E;Mt2;MT2A;MT1G	7	1	1	19.7	61103	61	6.79E-10	0.92932	19398	71031	3	0.66495	1133	85179	3	0.71837	0.64834	92845	3
CON__P81644	CON__P81644			1	2	2	11	11202	100	3.67E-09	NaN	NaN	NaN	0	NaN	NaN	NaN	0	NaN	NaN	NaN	0
CON__Q03247	CON__Q03247			1	8	5	27.8	35979	316	7.46E-34	NaN	NaN	NaN	0	NaN	NaN	NaN	0	NaN	NaN	NaN	0
CON__Q05B55	CON__Q05B55			1	1	1	9.2	26.59	240	3.49E-05	NaN	NaN	NaN	0	NaN	NaN	NaN	0	NaN	NaN	NaN	0
CON__Q0IIK2;CON__Q29443;CON__Q2HJF0	CON__Q0IIK2;CON__Q29443			3	39	34	60.8	77738	704	9.70E-236	NaN	NaN	NaN	0	NaN	NaN	NaN	0	NaN	NaN	NaN	0
CON__Q0V8M9;Q06033	CON__Q0V8M9			2	8	5	10.9	99536	891	7.31E-26	NaN	NaN	NaN	0	NaN	NaN	NaN	0	NaN	NaN	NaN	0
CON__Q1RMK2	CON__Q1RMK2			1	2	2	4.4	65056	597	9.66E-06	NaN	NaN	NaN	0	NaN	NaN	NaN	0	NaN	NaN	NaN	0
CON__Q28065	CON__Q28065			1	2	2	4.3	68886	610	4.58E-05	NaN	NaN	NaN	0	NaN	NaN	NaN	0	NaN	NaN	NaN	0
CON__Q28085	CON__Q28085			1	2	2	2.2	140.37	1236	6.78E-05	NaN	NaN	NaN	0	NaN	NaN	NaN	0	NaN	NaN	NaN	0
CON__Q28107	CON__Q28107			1	11	8	6.5	248.98	2211	8.23E-26	NaN	NaN	NaN	0	NaN	NaN	NaN	0	NaN	NaN	NaN	0
CON__Q2KJF1;P04217	CON__Q2KJF1			2	4	4	11.1	53553	503	7.90E-19	11317	0.86225	52582	2	0.90107	0.73019	57953	2	0.82603	0.88569	21484	2
CON__Q2TBQ1	CON__Q2TBQ1			1	2	1	5.4	75166	661	3.06E-08	NaN	NaN	NaN	0	NaN	NaN	NaN	0	NaN	NaN	NaN	0
CON__Q2UVX4	CON__Q2UVX4			1	17	6	11.9	187.37	1662	2.02E-53	NaN	NaN	NaN	0	NaN	NaN	NaN	0	NaN	NaN	NaN	0
CON__Q3KUS7	CON__Q3KUS7			1	3	2	5	85411	760	4.13E-15	NaN	NaN	NaN	0	NaN	NaN	NaN	0	NaN	NaN	NaN	0
CON__Q3SX09	CON__Q3SX09			1	10	6	55.2	22.06	201	4.11E-75	46362	105.86	366.72	4	35482	60615	450.77	4	0.61219	0.57146	78431	4
CON__Q3SZ57	CON__Q3SZ57			1	9	9	18.7	68587	610	2.20E-53	NaN	NaN	NaN	1	NaN	NaN	NaN	1	NaN	NaN	NaN	1
CON__Q3SZH5	CON__Q3SZH5			1	2	2	5.2	45456	424	8.76E-06	NaN	NaN	NaN	0	NaN	NaN	NaN	0	NaN	NaN	NaN	0
CON__Q3SZR3	CON__Q3SZR3			1	5	5	23.3	23182	202	4.63E-14	NaN	NaN	NaN	0	NaN	NaN	NaN	0	NaN	NaN	NaN	0
CON__Q3SZV7	CON__Q3SZV7			1	9	9	19.6	52295	460	1.06E-32	NaN	NaN	NaN	0	NaN	NaN	NaN	0	NaN	NaN	NaN	0
CON__Q3T052	CON__Q3T052			1	6	5	8.4	101.51	916	2.05E-16	NaN	NaN	NaN	0	NaN	NaN	NaN	0	NaN	NaN	NaN	0
CON__Q3ZBD7	CON__Q3ZBD7			1	10	2	23	62.87	557	2.09E-105	NaN	NaN	NaN	1	NaN	NaN	NaN	1	NaN	NaN	NaN	1
CON__Q3ZBS7	CON__Q3ZBS7			1	5	4	10.7	54099	484	1.32E-17	NaN	NaN	NaN	0	NaN	NaN	NaN	0	NaN	NaN	NaN	0
CON__Q58D62	CON__Q58D62			1	3	3	13.4	42663	387	6.04E-33	NaN	NaN	NaN	0	NaN	NaN	NaN	0	NaN	NaN	NaN	0
D3YXK2	D3YXK2	Scaffold attachment factor B1	Safb	1	7	0	8.8	105.1	937	8.53E-32	NaN	NaN	NaN	0	NaN	NaN	NaN	0	NaN	NaN	NaN	0
D3YZP9;Q16204	D3YZP9;Q16204	Coiled-coil domain-containing protein 6	Ccdc6;CCDC6	2	7	7	16.8	52938	469	1.03E-17	1536	15425	25351	6	10235	11282	60805	6	0.85048	0.86848	36865	6
Q9BX46;D3Z4I3;Q62176;Q9H0Z9	Q9BX46;D3Z4I3;Q62176;Q9H0Z9	RNA-binding protein 24;RNA-binding protein 38	RBM24;Rbm24;Rbm38;RBM38	4	2	2	11.4	24776	236	0.00022261	NaN	NaN	NaN	0	NaN	NaN	NaN	0	NaN	NaN	NaN	0
D3Z6Q9	D3Z6Q9	Bridging integrator 2	Bin2	1	1	1	3.1	52553	489	0.00069909	NaN	NaN	NaN	0	NaN	NaN	NaN	0	NaN	NaN	NaN	0
D3Z7P3	D3Z7P3	Glutaminase kidney isoform, mitochondrial	Gls	1	12	1	19.9	73963	674	8.75E-109	NaN	NaN	NaN	0	NaN	NaN	NaN	0	NaN	NaN	NaN	0
E9Q1P8	E9Q1P8	Interferon regulatory factor 2-binding protein 2	Irf2bp2	1	5	2	13.3	59291	570	1.46E-14	NaN	NaN	NaN	0	NaN	NaN	NaN	0	NaN	NaN	NaN	0
E9Q555	E9Q555	E3 ubiquitin-protein ligase RNF213	Rnf213	1	27	21	6.9	584.49	5150	2.66E-62	NaN	NaN	NaN	0	NaN	NaN	NaN	0	NaN	NaN	NaN	0
Q9HD67;F8VQB6	Q9HD67;F8VQB6	Unconventional myosin-X	MYO10;Myo10	2	3	3	2.1	237.34	2058	2.20E-08	11599	10857	16.85	2	0.69518	0.80462	11522	2	0.76523	0.83103	20639	2
O00115;P56542	O00115	Deoxyribonuclease-2-alpha	DNASE2	2	3	3	11.1	39.58	360	1.37E-07	NaN	NaN	NaN	1	NaN	NaN	NaN	1	NaN	NaN	NaN	1
O00116;Q8C0I1	O00116	Alkyldihydroxyacetonephosphate synthase, peroxisomal	AGPS	2	22	22	46.8	72911	658	1.32E-142	0.54679	0.77123	34022	29	0.6017	0.77556	37456	29	1069	11725	42918	29
P28740;O00139	P28740;O00139	Kinesin-like protein KIF2A	Kif2a;KIF2A	2	11	11	16.2	79755	705	4.88E-38	0.54406	0.93409	35248	15	0.5238	0.9074	44319	16	0.81678	0.90943	25.91	15
Q9WVC6;O00141	Q9WVC6;O00141	Serine/threonine-protein kinase Sgk1	Sgk1;SGK1	2	1	1	2.1	48928	431	5.73E-05	NaN	NaN	NaN	0	NaN	NaN	NaN	0	NaN	NaN	NaN	0
O00148;Q8VDW0	O00148;Q8VDW0	ATP-dependent RNA helicase DDX39A	DDX39A;Ddx39a	2	22	8	56	49129	427	9.17E-103	0.74088	0.52823	29393	22	0.66511	0.62924	58881	22	0.93946	10077	51211	22
O00154;Q91V12;Q6ZUV0	O00154;Q91V12	Cytosolic acyl coenzyme A thioester hydrolase	ACOT7;Acot7	3	11	11	30.8	41796	380	7.79E-61	0.95305	19133	71951	21	15624	22134	50417	21	0.91287	10631	55758	21
O00159	O00159	Unconventional myosin-Ic	MYO1C	1	21	9	26.1	121.68	1063	1.93E-85	0.64103	0.74348	62722	22	0.46976	0.63614	61049	22	0.75074	0.83856	64081	22
O00160	O00160	Unconventional myosin-If	MYO1F	1	4	1	4.9	124.84	1098	1.26E-13	NaN	NaN	NaN	0	NaN	NaN	NaN	0	NaN	NaN	NaN	0
O00161	O00161	Synaptosomal-associated protein 23	SNAP23	1	7	5	51.7	23354	211	3.49E-41	0.39625	0.66414	20824	3	0.4424	0.8289	12534	3	10537	10699	15.09	3
O00165;O35387	O00165	HCLS1-associated protein X-1	HAX1	2	4	4	21.9	31.62	279	2.41E-22	0.63208	0.54701	17859	8	0.75005	0.62048	24706	8	11646	12518	12743	8
O00170;O08915	O00170;O08915	AH receptor-interacting protein	AIP;Aip	2	11	11	45.2	37636	330	4.84E-47	12952	11375	29145	17	0.83343	11059	36575	17	0.94903	10055	22378	17
O00178;O08582	O00178;O08582	GTP-binding protein 1	GTPBP1;Gtpbp1	2	6	6	20	72453	669	1.57E-25	11538	16333	16.45	13	12208	17407	27.38	13	10348	11373	24883	13
O00186;Q60770	O00186	Syntaxin-binding protein 3	STXBP3	2	8	8	16.9	67764	592	1.13E-27	0.78256	0.72124	26125	6	0.77277	0.88516	32563	6	10249	1117	19325	6
O00193;Q9R0P4	O00193;Q9R0P4	Small acidic protein	SMAP;Smap	2	5	5	33.9	20332	183	6.19E-76	18313	19669	31881	13	12389	16737	34964	13	0.75912	0.89283	13424	13
O00203;Q9JME5;Q13367	O00203	AP-3 complex subunit beta-1	AP3B1	3	17	10	16.4	121.32	1094	7.26E-45	20781	19839	46423	25	17715	19277	42507	25	0.88446	10274	17628	25
O00213	O00213	Amyloid beta A4 precursor protein-binding family B member 1	APBB1	1	2	2	5.8	77243	710	4.32E-06	NaN	NaN	NaN	1	NaN	NaN	NaN	1	NaN	NaN	NaN	1
O00217;Q8K3J1	O00217;Q8K3J1	NADH dehydrogenase [ubiquinone] iron-sulfur protein 8, mitochondrial	NDUFS8;Ndufs8	2	5	5	20	23705	210	9.80E-16	12644	18446	23915	3	21143	26848	34328	3	12071	14693	50658	3
O00220	O00220	Tumor necrosis factor receptor superfamily member 10A	TNFRSF10A	1	1	1	2.8	50089	468	2.73E-05	0.56898	0.73612	111.01	2	0.56248	0.71635	102.91	2	10189	10338	64716	2
O00221	O00221	NF-kappa-B inhibitor epsilon	NFKBIE	1	2	2	9.6	52863	500	3.42E-12	38217	37692	0.79235	2	36329	47123	32466	2	0.97991	11654	33733	2
O00231;Q8BG32	O00231;Q8BG32	26S proteasome non-ATPase regulatory subunit 11	PSMD11;Psmd11	2	23	23	54	47463	422	8.46E-117	0.63499	11747	19778	37	0.726	11017	42885	37	0.84613	0.93121	40.17	37
O00232	O00232	26S proteasome non-ATPase regulatory subunit 12	PSMD12	1	19	7	45.6	52904	456	1.65E-138	0.55278	0.98936	28948	18	0.63633	10332	66809	18	0.94377	10433	56683	18
O00233	O00233	26S proteasome non-ATPase regulatory subunit 9	PSMD9	1	5	3	24.2	24682	223	2.88E-22	NaN	NaN	NaN	0	NaN	NaN	NaN	0	NaN	NaN	NaN	0
O00244	O00244	Copper transport protein ATOX1	ATOX1	1	6	6	73.5	74016	68	2.25E-75	19048	16494	29349	35	13457	14173	51513	35	0.74295	0.79444	42734	35
O55187;O00257	O55187;O00257	E3 SUMO-protein ligase CBX4	Cbx4;CBX4	2	2	2	5.4	60522	551	8.46E-17	NaN	NaN	NaN	0	NaN	NaN	NaN	0	NaN	NaN	NaN	0
O00264	O00264	Membrane-associated progesterone receptor component 1	PGRMC1	1	11	6	59	21671	195	3.80E-66	0.44428	0.48494	64846	15	0.55409	0.80243	60383	15	12964	14259	40.87	15
O00267;O55201	O00267;O55201	Transcription elongation factor SPT5	SUPT5H;Supt5h	2	20	20	27.3	121	1087	1.36E-85	0.73844	0.90715	21221	20	0.54567	0.79922	41911	20	0.8681	0.92991	25339	20
O00268	O00268	Transcription initiation factor TFIID subunit 4	TAF4	1	4	4	5.1	110.11	1085	1.46E-08	0.43766	0.6075	14662	2	0.49721	0.72	23352	2	11185	10993	20243	2
O00273	O00273	DNA fragmentation factor subunit alpha	DFFA	1	7	7	26.3	36521	331	4.29E-44	18439	16419	23895	8	1446	15023	31513	8	0.98533	0.99989	24935	8
O00291	O00291	Huntingtin-interacting protein 1	HIP1	1	4	1	6.1	116.22	1037	1.14E-18	NaN	NaN	NaN	1	NaN	NaN	NaN	1	NaN	NaN	NaN	1
O00299	O00299	Chloride intracellular channel protein 1	CLIC1	1	15	6	76.3	26922	241	7.11E-231	2136	20059	50923	50	17584	20449	68.37	50	0.83269	0.94588	36015	50
O00303;Q9DCH4	O00303;Q9DCH4	Eukaryotic translation initiation factor 3 subunit F	EIF3F;Eif3f	2	14	14	45.7	37563	357	9.61E-70	0.52149	1071	27593	21	0.62709	0.93511	62059	21	0.98938	0.9933	49233	21
O00308;Q9DBH0	O00308;Q9DBH0	NEDD4-like E3 ubiquitin-protein ligase WWP2	WWP2;Wwp2	2	4	4	4.9	98911	870	1.31E-09	0.40468	0.84367	66446	2	0.74023	13644	69647	2	17041	14454	48071	2
O00327;Q9WTL8	O00327;Q9WTL8	Aryl hydrocarbon receptor nuclear translocator-like protein 1	ARNTL;Arntl	2	1	1	3.4	68761	626	1.29E-09	NaN	NaN	NaN	0	NaN	NaN	NaN	0	NaN	NaN	NaN	0
O00329;O35904	O00329;O35904	Phosphatidylinositol 4,5-bisphosphate 3-kinase catalytic subunit delta isoform	PIK3CD;Pik3cd	2	4	2	3.7	119.48	1044	2.56E-10	0.64605	13124	21645	2	13263	24224	5877	2	17549	15831	15466	2
O00330;Q8BKZ9	O00330	Pyruvate dehydrogenase protein X component, mitochondrial	PDHX	2	13	13	31.7	54122	501	1.44E-62	0.5993	0.43202	30909	5	0.5609	0.53979	23935	5	10345	12332	79805	5
O00401;Q91YD9	O00401;Q91YD9	Neural Wiskott-Aldrich syndrome protein	WASL;Wasl	2	6	6	19.6	54826	505	1.15E-21	0.79775	14771	23915	2	11014	19701	26456	2	14981	14078	45978	2
O00410;Q8BKC5	O00410;Q8BKC5	Importin-5	IPO5;Ipo5	2	39	38	47.8	123.63	1097	0	13475	13382	31616	76	10283	12008	37877	76	0.81921	0.92366	35019	76
O00411;Q8BKF1	O00411	DNA-directed RNA polymerase, mitochondrial	POLRMT	2	5	5	5	138.62	1230	8.03E-11	0.56426	0.4868	17104	4	0.61026	0.50043	27919	4	11069	11758	19899	4
O00418;O08796	O00418;O08796	Eukaryotic elongation factor 2 kinase	EEF2K;Eef2k	2	2	2	2.9	82143	725	3.11E-05	14143	17108	21079	2	17491	21266	25006	2	13253	12908	32177	2
O55128;O00422	O55128;O00422	Histone deacetylase complex subunit SAP18	Sap18;SAP18	2	4	4	21.6	17595	153	1.64E-24	0.49244	0.77738	17725	9	0.58006	0.78867	15507	9	0.99533	10981	21615	9
O00425;Q9CPN8	O00425;Q9CPN8	Insulin-like growth factor 2 mRNA-binding protein 3	IGF2BP3;Igf2bp3	2	19	17	41.5	63704	579	1.85E-169	0.68562	11262	36286	21	0.79491	10882	56308	21	0.89759	0.98518	35691	20
O00429;Q8K1M6	O00429;Q8K1M6	Dynamin-1-like protein	DNM1L;Dnm1l	2	29	29	50.8	81876	736	1.07E-142	19334	16607	32633	29	19183	19712	58671	28	0.96824	0.99087	40178	29
O00442;Q9D7H3	O00442	RNA 3-terminal phosphate cyclase	RTCA	2	8	8	28.7	39336	366	7.22E-47	16119	17347	58118	8	13824	16189	52999	8	0.79094	0.89836	20539	8
O00443;Q61194	O00443	Phosphatidylinositol 4-phosphate 3-kinase C2 domain-containing subunit alpha	PIK3C2A	2	25	25	17.3	190.68	1686	8.73E-73	0.83503	10316	26545	23	0.85094	10188	38145	23	0.87793	10024	35632	23
O00459;O08908	O00459;O08908	Phosphatidylinositol 3-kinase regulatory subunit beta	PIK3R2;Pik3r2	2	3	2	5.8	81544	728	1.21E-08	18985	22656	69436	2	11866	15141	173.17	2	0.57729	0.60754	90627	2
O00461	O00461	Golgi integral membrane protein 4	GOLIM4	1	6	2	9.5	81879	696	3.59E-18	0.5267	0.68725	34023	2	0.87245	12387	118.12	2	20193	19764	99822	2
O00463	O00463	TNF receptor-associated factor 5	TRAF5	1	2	2	6.1	64405	557	8.54E-18	0.73485	13263	35405	3	0.86239	11578	22402	3	0.70799	0.80727	13779	3
O00468	O00468	Agrin;Agrin N-terminal 110 kDa subunit;Agrin C-terminal 110 kDa subunit;Agrin C-terminal 90 kDa fragment;Agrin C-terminal 22 kDa fragment	AGRN	1	42	37	29.4	214.84	2045	3.67E-242	53215	59337	72.95	27	45882	51265	82662	27	0.8815	0.97411	45783	27
O00469;Q9R0B9	O00469;Q9R0B9	Procollagen-lysine,2-oxoglutarate 5-dioxygenase 2	PLOD2;Plod2	2	11	11	19.8	84685	737	9.04E-30	10836	22892	51659	9	0.81675	1285	41569	9	0.72293	0.66285	56762	9
Q3TPX4;O00471	Q3TPX4;O00471	Exocyst complex component 5	Exoc5;EXOC5	2	8	8	14.1	81737	708	2.81E-20	17478	14067	23813	10	19231	15136	31016	10	0.88557	0.94328	15641	10
O00483	O00483	NADH dehydrogenase [ubiquinone] 1 alpha subcomplex subunit 4	NDUFA4	1	5	3	46.9	93697	81	1.70E-16	12083	12441	32958	11	0.83679	10742	33926	11	0.79075	0.94415	23832	11
O35593;O00487	O35593;O00487	26S proteasome non-ATPase regulatory subunit 14	Psmd14;PSMD14	2	9	9	35.2	34577	310	1.89E-45	1179	13603	36332	14	0.87761	13484	53139	14	0.99458	0.9308	30429	14
O00488;Q9DB42	O00488;Q9DB42	Zinc finger protein 593	ZNF593;Znf593	2	2	2	24.6	15199	134	1.85E-07	NaN	NaN	NaN	1	NaN	NaN	NaN	1	NaN	NaN	NaN	1
O00499	O00499	Myc box-dependent-interacting protein 1	BIN1	1	6	2	15.9	64699	593	4.33E-16	0.7308	0.97414	15625	2	0.78936	10955	1387	2	10461	10601	29679	2
O00505;O35344	O00505;O35344	Importin subunit alpha-3	KPNA3;Kpna3	2	9	7	22.5	57.81	521	4.57E-56	0.49175	0.93682	16287	10	0.49262	0.87769	32687	10	0.84459	0.95605	33987	10
Q9Z2W1;O00506	Q9Z2W1;O00506	Serine/threonine-protein kinase 25	Stk25;STK25	2	4	1	11.5	48157	426	2.06E-13	NaN	NaN	NaN	1	NaN	NaN	NaN	1	NaN	NaN	NaN	1
O00541;Q9EQ61	O00541	Pescadillo homolog	PES1	2	19	19	32.3	68002	588	6.27E-77	0.48656	0.62595	34858	17	0.46115	0.6519	52829	17	10966	10573	48153	17
O00560	O00560	Syntenin-1	SDCBP	1	10	4	56.4	32444	298	6.85E-75	11716	1058	21.45	14	10885	12315	35606	14	0.88537	0.94692	18128	14
O00566	O00566	U3 small nucleolar ribonucleoprotein protein MPP10	MPHOSPH10	1	10	6	21	78863	681	1.75E-29	0.53374	0.60731	19993	12	0.49497	0.62017	22928	12	0.94033	10321	28129	12
O00567;Q9D6Z1	O00567	Nucleolar protein 56	NOP56	2	26	26	57.1	66049	594	3.66E-141	0.50392	0.7431	41445	38	0.57945	0.75736	39853	38	10819	11289	33616	38
O00571;P16381;O15523;Q61496;Q9NQI0	O00571;P16381;O15523	ATP-dependent RNA helicase DDX3X;Putative ATP-dependent RNA helicase Pl10;ATP-dependent RNA helicase DDX3Y	DDX3X;D1Pas1;DDX3Y	5	38	5	51.8	73243	662	3.12E-190	0.77836	0.91249	28169	79	0.68615	0.87345	46916	79	0.88463	0.92512	41556	79
O00625;Q9D711	O00625;Q9D711	Pirin	PIR;Pir	2	7	7	30	32113	290	2.54E-39	0.46092	0.90751	28885	7	0.552	10008	38156	7	0.90455	0.94289	18699	7
O00629;O35343	O00629;O35343	Importin subunit alpha-4	KPNA4;Kpna4	2	6	4	20	57886	521	6.66E-36	10311	0.95679	16956	9	0.66386	0.72408	18115	9	0.79082	0.85562	20425	9
Q9CQR6;O00743	Q9CQR6;O00743	Serine/threonine-protein phosphatase 6 catalytic subunit	Ppp6c;PPP6C	2	4	4	13.8	35159	305	1.68E-15	0.71345	14364	62742	5	14121	16205	49217	5	0.8858	0.97088	98469	5
O00746;Q9WV84	O00746	Nucleoside diphosphate kinase, mitochondrial	NME4	2	3	3	20.3	20658	187	3.94E-08	25571	23345	14001	2	23788	25351	25174	2	0.94543	10514	40988	2
O00754	O00754	Lysosomal alpha-mannosidase;Lysosomal alpha-mannosidase A peptide;Lysosomal alpha-mannosidase B peptide;Lysosomal alpha-mannosidase C peptide;Lysosomal alpha-mannosidase D peptide;Lysosomal alpha-mannosidase E peptide	MAN2B1	1	9	9	14.3	113.74	1011	7.61E-29	10851	1069	16591	6	11032	11136	17302	6	10948	10459	16468	6
O00762;Q9D1C1	O00762;Q9D1C1	Ubiquitin-conjugating enzyme E2 C	UBE2C;Ube2c	2	7	7	60.3	19652	179	1.10E-52	0.43839	0.93774	15069	3	0.39589	0.83377	24211	3	10124	0.96188	25.85	3
O00763	O00763	Acetyl-CoA carboxylase 2;Biotin carboxylase	ACACB	1	4	1	2.5	276.54	2458	7.72E-12	NaN	NaN	NaN	0	NaN	NaN	NaN	0	NaN	NaN	NaN	0
O00764	O00764	Pyridoxal kinase	PDXK	1	4	4	21.2	35102	312	8.37E-39	21039	18985	25145	8	18651	18854	44	8	10314	11093	30493	8
O00767	O00767	Acyl-CoA desaturase	SCD	1	3	3	10.9	41522	359	1.73E-21	0.20264	0.27257	139.98	2	0.22984	0.30196	106.94	2	1.28	12339	56813	2
O08528	O08528	Hexokinase-2	Hk2	1	18	1	24.6	102.53	917	3.96E-82	NaN	NaN	NaN	0	NaN	NaN	NaN	0	NaN	NaN	NaN	0
O08529	O08529	Calpain-2 catalytic subunit	Capn2	1	15	8	28	79871	700	6.64E-36	NaN	NaN	NaN	0	NaN	NaN	NaN	0	NaN	NaN	NaN	0
P54289;O08532	P54289;O08532	Voltage-dependent calcium channel subunit alpha-2/delta-1;Voltage-dependent calcium channel subunit alpha-2-1;Voltage-dependent calcium channel subunit delta-1	CACNA2D1;Cacna2d1	2	2	2	3	124.57	1103	9.75E-06	NaN	NaN	NaN	1	NaN	NaN	NaN	1	NaN	NaN	NaN	1
O08539	O08539	Myc box-dependent-interacting protein 1	Bin1	1	6	2	17.2	64469	588	4.68E-37	46105	40287	104.55	5	35564	38404	35553	4	0.50863	0.60676	78695	5
O75396;O08547	O75396;O08547	Vesicle-trafficking protein SEC22b	SEC22B;Sec22b	2	11	11	51.2	24593	215	2.93E-79	0.62958	12213	23875	11	0.81076	13333	40791	11	12827	1145	24546	11
O08553	O08553	Dihydropyrimidinase-related protein 2	Dpysl2	1	19	3	46	62277	572	3.85E-185	NaN	NaN	NaN	0	NaN	NaN	NaN	0	NaN	NaN	NaN	0
O08573	O08573	Galectin-9	Lgals9	1	4	4	12.7	40035	353	8.80E-15	NaN	NaN	NaN	0	NaN	NaN	NaN	0	NaN	NaN	NaN	0
O08585;P09496	O08585;P09496	Clathrin light chain A	Clta;CLTA	2	7	7	20.9	25604	235	3.85E-17	12048	13289	24.76	15	11961	12975	53588	15	11231	11954	37.08	15
P61764;O08599;Q15833	P61764;O08599	Syntaxin-binding protein 1	STXBP1;Stxbp1	3	25	24	41.1	67568	594	7.07E-133	0.61052	0.95752	28144	50	0.65895	0.96065	50037	50	0.86683	0.93379	39881	50
O08677	O08677	Kininogen-1;Kininogen-1 heavy chain;Bradykinin;Kininogen-1 light chain	Kng1	1	18	18	27.7	73101	661	4.02E-166	NaN	NaN	NaN	1	NaN	NaN	NaN	1	NaN	NaN	NaN	1
O15484;O08688	O15484;O08688	Calpain-5	CAPN5;Capn5	2	2	2	4.5	73168	640	1.35E-05	NaN	NaN	NaN	1	NaN	NaN	NaN	1	NaN	NaN	NaN	1
O08709	O08709	Peroxiredoxin-6	Prdx6	1	12	7	50.9	24.87	224	1.11E-47	NaN	NaN	NaN	0	NaN	NaN	NaN	0	NaN	NaN	NaN	0
O08749	O08749	Dihydrolipoyl dehydrogenase, mitochondrial	Dld	1	6	1	17.5	54272	509	1.02E-39	NaN	NaN	NaN	0	NaN	NaN	NaN	0	NaN	NaN	NaN	0
O08756	O08756	3-hydroxyacyl-CoA dehydrogenase type-2	Hsd17b10	1	4	2	29.1	27418	261	1.43E-56	NaN	NaN	NaN	0	NaN	NaN	NaN	0	NaN	NaN	NaN	0
O08784	O08784	Treacle protein	Tcof1	1	2	2	2.5	135	1320	3.91E-06	NaN	NaN	NaN	0	NaN	NaN	NaN	0	NaN	NaN	NaN	0
O08788	O08788	Dynactin subunit 1	Dctn1	1	25	2	28.7	141.67	1281	5.29E-128	NaN	NaN	NaN	0	NaN	NaN	NaN	0	NaN	NaN	NaN	0
O08795	O08795	Glucosidase 2 subunit beta	Prkcsh	1	5	3	10.4	58792	521	7.11E-55	0.56479	0.8409	41272	2	0.44821	0.67868	26.29	2	0.83579	0.88719	14.7	2
Q10472;O08912;Q8IUC8;Q8CF93	Q10472;O08912	Polypeptide N-acetylgalactosaminyltransferase 1;Polypeptide N-acetylgalactosaminyltransferase 1 soluble form	GALNT1;Galnt1	4	5	5	12	64218	559	6.19E-10	0.48502	0.68591	46539	2	0.38309	0.5483	71.38	2	0.75783	0.78633	82458	2
O08919;Q9Y6R0	O08919;Q9Y6R0	Numb-like protein	Numbl;NUMBL	2	2	1	2.8	64.13	604	2.10E-06	NaN	NaN	NaN	0	NaN	NaN	NaN	0	NaN	NaN	NaN	0
O08997	O08997	Copper transport protein ATOX1	Atox1	1	4	4	58.8	73384	68	1.19E-12	NaN	NaN	NaN	0	NaN	NaN	NaN	0	NaN	NaN	NaN	0
O09044	O09044	Synaptosomal-associated protein 23	Snap23	1	5	3	43.3	23261	210	3.86E-20	NaN	NaN	NaN	0	NaN	NaN	NaN	0	NaN	NaN	NaN	0
O09049	O09049	Regenerating islet-derived protein 3-gamma	Reg3g	1	2	2	14.9	19307	174	3.34E-06	NaN	NaN	NaN	0	NaN	NaN	NaN	0	NaN	NaN	NaN	0
O09131	O09131	Glutathione S-transferase omega-1	Gsto1	1	5	3	18.3	27497	240	1.97E-16	NaN	NaN	NaN	0	NaN	NaN	NaN	0	NaN	NaN	NaN	0
O09159	O09159	Lysosomal alpha-mannosidase	Man2b1	1	3	3	4.8	114.65	1013	2.43E-19	NaN	NaN	NaN	0	NaN	NaN	NaN	0	NaN	NaN	NaN	0
O09164	O09164	Extracellular superoxide dismutase [Cu-Zn]	Sod3	1	3	3	15.1	27392	251	5.03E-08	NaN	NaN	NaN	1	NaN	NaN	NaN	1	NaN	NaN	NaN	1
O09165;P31415	O09165;P31415	Calsequestrin-1	Casq1;CASQ1	2	4	4	14.8	46377	405	1.38E-35	NaN	NaN	NaN	0	NaN	NaN	NaN	0	NaN	NaN	NaN	0
O09167	O09167	60S ribosomal protein L21	Rpl21	1	7	1	41.9	18562	160	9.51E-28	NaN	NaN	NaN	0	NaN	NaN	NaN	0	NaN	NaN	NaN	0
O09172	O09172	Glutamate--cysteine ligase regulatory subunit	Gclm	1	4	1	17.2	30534	274	3.49E-11	NaN	NaN	NaN	0	NaN	NaN	NaN	0	NaN	NaN	NaN	0
O14497;A2BH40	O14497;A2BH40	AT-rich interactive domain-containing protein 1A	ARID1A;Arid1a	2	13	11	9.9	242.04	2285	9.57E-60	0.36364	0.52475	38807	8	0.4364	0.58472	38.77	8	0.99176	0.98346	22969	8
O14523	O14523	C2 domain-containing protein 2-like	C2CD2L	1	2	2	6.1	76.18	706	1.44E-14	NaN	NaN	NaN	0	NaN	NaN	NaN	0	NaN	NaN	NaN	0
O14524	O14524	Transmembrane protein 194A	TMEM194A	1	4	4	9.5	50639	444	5.62E-14	NaN	NaN	NaN	1	NaN	NaN	NaN	1	NaN	NaN	NaN	1
O14530	O14530	Thioredoxin domain-containing protein 9	TXNDC9	1	5	5	23.9	26534	226	8.83E-14	0.8295	10103	53595	9	0.75328	1189	48695	9	10554	10756	18632	9
O14531;O35098	O14531	Dihydropyrimidinase-related protein 4	DPYSL4	2	4	4	13.8	61877	572	3.05E-30	NaN	NaN	NaN	0	NaN	NaN	NaN	0	NaN	NaN	NaN	0
O14548;Q61387	O14548	Cytochrome c oxidase subunit 7A-related protein, mitochondrial	COX7A2L	2	3	3	28.1	12615	114	3.68E-09	NaN	NaN	NaN	1	NaN	NaN	NaN	1	NaN	NaN	NaN	1
O14562;Q78JW9	O14562;Q78JW9	Ubiquitin domain-containing protein UBFD1	UBFD1;Ubfd1	2	3	3	14.9	33382	309	8.07E-16	NaN	NaN	NaN	1	NaN	NaN	NaN	1	NaN	NaN	NaN	1
O14578;P49025	O14578;P49025	Citron Rho-interacting kinase	CIT;Cit	2	18	18	11.2	231.43	2027	2.30E-105	0.56408	0.57653	19294	13	0.43093	0.4776	32383	13	0.95307	0.99151	25.8	13
O14579	O14579	Coatomer subunit epsilon	COPE	1	9	8	39	34482	308	8.24E-54	0.96733	12387	32466	16	12701	11726	37669	16	1021	0.99581	24151	16
O14617;O54774	O14617;O54774	AP-3 complex subunit delta-1	AP3D1;Ap3d1	2	26	26	31.6	130.16	1153	2.81E-105	0.75114	1239	25048	33	0.68494	11405	34501	33	0.90848	0.98471	25808	33
O14618;Q9WU84	O14618;Q9WU84	Copper chaperone for superoxide dismutase	CCS;Ccs	2	3	3	11.3	29.04	274	7.76E-09	NaN	NaN	NaN	0	NaN	NaN	NaN	0	NaN	NaN	NaN	0
O14639;Q8K4G5	O14639	Actin-binding LIM protein 1	ABLIM1	2	5	5	10	87687	778	9.83E-23	18114	1539	63282	5	22109	21374	54.69	5	1141	11882	13422	5
O14646	O14646	Chromodomain-helicase-DNA-binding protein 1	CHD1	1	15	3	10.9	196.69	1710	3.14E-87	0.39346	0.58128	38486	15	0.42985	0.64755	26953	15	10308	10825	24901	15
O14647	O14647	Chromodomain-helicase-DNA-binding protein 2	CHD2	1	7	3	3.9	211.34	1828	7.78E-15	NaN	NaN	NaN	1	NaN	NaN	NaN	1	NaN	NaN	NaN	1
O14653	O14653	Golgi SNAP receptor complex member 2	GOSR2	1	4	3	27.8	24775	212	4.89E-20	0.49599	0.71619	42081	3	0.64746	10764	37758	3	11662	11386	16215	3
O14656;Q9ER39	O14656	Torsin-1A	TOR1A	2	5	5	16	37808	332	3.28E-11	0.36538	0.73211	47707	5	0.3722	0.63955	64508	5	11045	10854	52.74	5
O14662;Q8BVI5	O14662;Q8BVI5	Syntaxin-16	STX16;Stx16	2	3	3	7.7	37031	325	2.24E-07	0.70489	0.8328	24.83	4	0.40118	0.49243	96058	4	0.53116	0.55266	80029	4
O14672;O35598	O14672;O35598	Disintegrin and metalloproteinase domain-containing protein 10	ADAM10;Adam10	2	18	18	32.5	84141	748	2.57E-77	0.53428	0.69474	40374	13	0.44649	0.78928	45371	13	12805	13274	37.15	13
O14686;Q6PDK2	O14686	Histone-lysine N-methyltransferase MLL2	MLL2	2	10	10	3.8	593.38	5537	8.16E-39	0.57399	0.59929	25606	9	0.52932	0.6088	50098	9	0.8561	10168	35192	9
Q99666;O14715	Q99666;O14715	RANBP2-like and GRIP domain-containing protein 5/6;RANBP2-like and GRIP domain-containing protein 8	RGPD5;RGPD8	2	22	3	16.7	198.92	1765	4.69E-90	NaN	NaN	NaN	0	NaN	NaN	NaN	0	NaN	NaN	NaN	0
O14727	O14727	Apoptotic protease-activating factor 1	APAF1	1	4	4	5	141.84	1248	6.38E-10	0.85341	12586	4283	4	0.60069	0.96855	26754	4	0.82362	0.93059	18188	4
O14733;Q8CE90	O14733;Q8CE90	Dual specificity mitogen-activated protein kinase kinase 7	MAP2K7;Map2k7	2	3	3	8.6	47484	419	1.68E-07	NaN	NaN	NaN	1	NaN	NaN	NaN	1	NaN	NaN	NaN	1
O14734	O14734	Acyl-coenzyme A thioesterase 8	ACOT8	1	4	3	20.4	35914	319	2.13E-09	0.61035	0.90559	71349	4	0.48712	0.79107	74329	4	0.83745	0.91011	31.11	4
O14737;P56812	O14737;P56812	Programmed cell death protein 5	PDCD5;Pdcd5	2	7	7	56	14285	125	1.89E-26	15577	16667	17095	5	12244	14642	30.5	5	0.78163	0.88201	20542	5
O14744	O14744	Protein arginine N-methyltransferase 5;Protein arginine N-methyltransferase 5, N-terminally processed	PRMT5	1	17	5	32	72683	637	1.47E-103	12611	12657	23484	26	10987	13042	28.9	26	0.97717	10521	25095	26
O14745	O14745	Na(+)/H(+) exchange regulatory cofactor NHE-RF1	SLC9A3R1	1	11	7	43	38868	358	3.22E-70	0.95604	12053	25978	14	0.85621	10667	24235	14	0.99177	10937	20387	14
O14757;O35280	O14757	Serine/threonine-protein kinase Chk1	CHEK1	2	3	3	8.4	54433	476	1.45E-05	NaN	NaN	NaN	0	NaN	NaN	NaN	0	NaN	NaN	NaN	0
O14763	O14763	Tumor necrosis factor receptor superfamily member 10B	TNFRSF10B	1	4	4	14.5	47878	440	3.14E-14	0.33652	0.32775	40628	2	0.31929	0.36594	82169	2	0.99436	1095	60188	2
O14773	O14773	Tripeptidyl-peptidase 1	TPP1	1	4	4	10.7	61247	563	1.32E-18	22411	15504	15436	17	18458	12759	18095	17	0.84011	0.89226	86838	17
O14776;Q8CGF7;Q5VWI1;Q3B807	O14776;Q8CGF7	Transcription elongation regulator 1	TCERG1;Tcerg1	4	23	23	23	123.9	1098	5.18E-67	0.71085	0.72163	38621	23	0.5886	0.88615	46869	23	0.90271	10126	24619	23
O14777	O14777	Kinetochore protein NDC80 homolog	NDC80	1	7	7	14.8	73912	642	4.21E-26	0.61972	12463	24.21	3	0.76063	11409	61204	3	0.83747	0.97864	50449	3
P97333;O14786	P97333;O14786	Neuropilin-1	Nrp1;NRP1	2	1	1	2.5	103	923	1.32E-09	NaN	NaN	NaN	0	NaN	NaN	NaN	0	NaN	NaN	NaN	0
O14802	O14802	DNA-directed RNA polymerase III subunit RPC1	POLR3A	1	11	11	12.3	155.64	1390	7.67E-40	0.76697	0.76272	44173	4	10693	0.87212	9669	3	12123	1285	14864	4
O14818;Q9Z2U0;Q9CWH6;Q8TAA3	O14818;Q9Z2U0	Proteasome subunit alpha type-7	PSMA7;Psma7	4	14	14	56.9	27887	248	3.29E-123	0.72392	1184	24373	32	0.78798	10271	38454	32	0.83966	0.89175	26835	32
O14828;O35609	O14828;O35609	Secretory carrier-associated membrane protein 3	SCAMP3;Scamp3	2	7	7	29.1	38287	347	4.47E-35	0.68831	0.6674	19432	5	0.64545	0.56486	26099	5	0.8378	0.91027	18411	5
O14841;Q8K010	O14841	5-oxoprolinase	OPLAH	2	14	14	18	137.46	1288	1.21E-42	12845	24727	27132	8	18054	2746	32059	8	12034	1154	17.5	8
O14874;O55028	O14874;O55028	[3-methyl-2-oxobutanoate dehydrogenase [lipoamide]] kinase, mitochondrial	BCKDK;Bckdk	2	2	2	7.8	46.36	412	1.62E-07	NaN	NaN	NaN	0	NaN	NaN	NaN	0	NaN	NaN	NaN	0
O14879	O14879	Interferon-induced protein with tetratricopeptide repeats 3	IFIT3	1	13	13	36.9	55984	490	4.26E-126	NaN	NaN	NaN	1	NaN	NaN	NaN	1	NaN	NaN	NaN	1
O14880	O14880	Microsomal glutathione S-transferase 3	MGST3	1	1	1	14.5	16516	152	2.56E-20	0.85417	0.74313	51861	5	0.91012	0.80636	20.97	5	10532	11027	34987	5
Q9DBG9;O14907	Q9DBG9;O14907	Tax1-binding protein 3	Tax1bp3;TAX1BP3	2	2	2	28.2	13722	124	3.39E-11	NaN	NaN	NaN	1	NaN	NaN	NaN	1	NaN	NaN	NaN	1
O14908;Q9Z0G0;Q8R5M0;Q8TF64	O14908;Q9Z0G0	PDZ domain-containing protein GIPC1	GIPC1;Gipc1	4	9	9	39.9	36049	333	4.82E-61	0.41197	0.78291	34732	6	0.45	0.81401	61604	6	0.94256	0.85199	65.57	6
O14920;O88351	O14920;O88351	Inhibitor of nuclear factor kappa-B kinase subunit beta	IKBKB;Ikbkb	2	4	4	8.5	86563	756	1.12E-18	0.67658	13375	47494	3	10694	17318	24466	3	15006	13406	19367	3
Q9WTQ8;O14925;Q5SRD1	Q9WTQ8;O14925;Q5SRD1	Mitochondrial import inner membrane translocase subunit Tim23;Putative mitochondrial import inner membrane translocase subunit Tim23B	Timm23;TIMM23;TIMM23B	3	4	4	23.4	21978	209	2.49E-18	NaN	NaN	NaN	1	NaN	NaN	NaN	1	NaN	NaN	NaN	1
O14929;Q8BY71	O14929;Q8BY71	Histone acetyltransferase type B catalytic subunit	HAT1;Hat1	2	12	12	42	49512	419	6.19E-131	0.68477	0.7921	40626	9	0.78564	10391	60311	9	0.78007	0.87799	37625	9
O14933	O14933	Ubiquitin/ISG15-conjugating enzyme E2 L6	UBE2L6	1	5	5	43.1	17769	153	7.89E-24	0.96481	19958	70091	4	36986	63056	38.42	4	28047	23926	56151	4
O70589;O14936	O70589;O14936	Peripheral plasma membrane protein CASK	Cask;CASK	2	3	3	3.7	105.11	926	2.32E-07	NaN	NaN	NaN	0	NaN	NaN	NaN	0	NaN	NaN	NaN	0
O14949	O14949	Cytochrome b-c1 complex subunit 8	UQCRQ	1	3	1	35.4	99062	82	8.40E-30	0.4752	10842	12065	2	0.7504	13341	97278	2	14982	11836	26722	2
P19105;Q3THE2;O14950	P19105;Q3THE2;O14950	Myosin regulatory light chain 12A;Myosin regulatory light chain 12B	MYL12A;Myl12b;MYL12B	3	13	6	55	19794	171	1.80E-84	16259	19117	42801	33	16156	17415	71136	33	0.86407	0.85909	39093	33
O14964;Q99LI8	O14964;Q99LI8	Hepatocyte growth factor-regulated tyrosine kinase substrate	HGS;Hgs	2	13	13	17.2	86191	777	3.18E-33	21695	14588	23673	10	14632	14341	29137	10	0.84446	0.93644	21.8	10
O14965;P97477	O14965	Aurora kinase A	AURKA	2	8	7	27.5	45809	403	6.37E-22	0.31728	0.63338	12417	3	0.35334	0.62216	12189	3	12228	10228	2363	3
O14966;Q91YQ1	O14966;Q91YQ1	Ras-related protein Rab-7L1	RAB7L1;Rab7l1	2	4	3	19.2	23155	203	7.68E-16	NaN	NaN	NaN	1	NaN	NaN	NaN	1	NaN	NaN	NaN	1
O14967	O14967	Calmegin	CLGN	1	2	2	5.7	70038	610	4.28E-05	0.6098	11039	58663	3	0.69389	0.96689	35299	3	0.7819	0.82132	47522	3
O14972	O14972	Down syndrome critical region protein 3	DSCR3	1	2	2	9.8	33.01	297	2.61E-13	0.9226	0.87677	77495	3	0.8162	0.88198	14417	3	0.89243	10308	14935	3
O14974;Q9DBR7;Q8BG95	O14974;Q9DBR7	Protein phosphatase 1 regulatory subunit 12A	PPP1R12A;Ppp1r12a	3	7	7	10.4	115.28	1030	1.11E-22	0.87019	12502	20085	6	0.89438	11514	30089	6	0.95428	0.97389	33734	6
O14976;Q99KY4	O14976	Cyclin-G-associated kinase	GAK	2	9	9	10	143.19	1311	2.37E-22	0.4974	10009	44828	2	0.75398	14873	73403	2	15315	14428	39788	2
Q9Z130;O14979	Q9Z130;O14979	Heterogeneous nuclear ribonucleoprotein D-like	Hnrpdl;HNRPDL	2	14	12	37.2	33558	301	3.63E-126	0.70888	0.81773	53204	21	0.58349	0.78662	60733	21	0.88782	0.9919	32313	21
O14980	O14980	Exportin-1	XPO1	1	36	6	40	123.38	1071	1.25E-211	10047	10407	37987	65	0.73932	10436	63822	65	0.89717	10211	42893	64
O14981	O14981	TATA-binding protein-associated factor 172	BTAF1	1	15	15	9	206.89	1849	2.46E-37	10068	0.91267	44401	9	0.97834	10003	42292	9	10441	0.8559	36489	9
O15013;Q8C033	O15013	Rho guanine nucleotide exchange factor 10	ARHGEF10	2	4	4	3.5	151.61	1369	6.75E-09	0.75719	10753	40946	3	0.79363	11055	34511	3	11622	11021	10115	3
O15014;Q8BZ47	O15014	Zinc finger protein 609	ZNF609	2	4	4	4.4	151.19	1411	1.14E-17	0.36154	0.41312	67776	3	0.30608	0.34032	68002	3	0.67643	0.81187	49368	3
O15027	O15027	Protein transport protein Sec16A	SEC16A	1	9	9	6.5	233.51	2179	5.98E-27	11109	1218	49639	11	0.96984	10822	75456	11	0.76296	0.80131	45877	11
O15031	O15031	Plexin-B2	PLXNB2	1	22	13	16.8	205.12	1838	1.38E-62	0.56	0.66855	35539	17	0.50271	0.61129	32357	17	0.94767	10621	47939	17
Q6NV83;O15042	Q6NV83;O15042	U2 snRNP-associated SURP motif-containing protein	U2surp;U2SURP	2	17	17	18.8	118.26	1029	8.58E-83	0.61207	0.60013	31193	26	0.50737	0.6504	34793	26	0.91607	0.96089	30031	26
O15047	O15047	Histone-lysine N-methyltransferase SETD1A	SETD1A	1	2	2	1.7	186.03	1707	7.18E-06	NaN	NaN	NaN	0	NaN	NaN	NaN	0	NaN	NaN	NaN	0
O15061	O15061	Synemin	SYNM	1	4	3	2.9	172.77	1565	3.42E-11	0.27683	0.57251	34205	3	0.27519	0.5098	25114	3	0.92536	0.81472	33709	3
O15066;Q61771;O14782;O35066	O15066;Q61771	Kinesin-like protein KIF3B	KIF3B;Kif3b	4	6	6	10.8	85124	747	1.22E-45	17574	20461	40169	4	14588	15718	42388	4	0.84149	0.89509	13213	4
O15067	O15067	Phosphoribosylformylglycinamidine synthase	PFAS	1	18	10	18.5	144.73	1338	5.35E-75	13146	15869	35574	17	12684	17132	40968	17	10141	10709	25761	17
O15075;Q9JLM8;O88809;O43602	O15075;Q9JLM8	Serine/threonine-protein kinase DCLK1	DCLK1;Dclk1	4	4	4	6.1	82223	740	8.23E-11	12417	19837	38631	3	0.80385	13716	23597	3	0.63522	0.6414	24176	3
Q505D1;O15084	Q505D1;O15084	Serine/threonine-protein phosphatase 6 regulatory ankyrin repeat subunit A	Ankrd28;ANKRD28	2	7	6	9.8	112.9	1053	2.28E-17	12101	1607	45342	4	0.75706	14376	33144	5	0.8533	0.99198	32736	5
O15085	O15085	Rho guanine nucleotide exchange factor 11	ARHGEF11	1	2	2	2	167.7	1522	5.32E-06	NaN	NaN	NaN	0	NaN	NaN	NaN	0	NaN	NaN	NaN	0
O15091	O15091	Mitochondrial ribonuclease P protein 3	KIAA0391	1	3	3	9.1	67315	583	2.20E-12	NaN	NaN	NaN	1	NaN	NaN	NaN	1	NaN	NaN	NaN	1
O15111;Q60680	O15111;Q60680	Inhibitor of nuclear factor kappa-B kinase subunit alpha	CHUK;Chuk	2	3	3	6.2	84639	745	3.34E-08	10584	1542	31288	2	0.96082	14576	43.22	2	0.92089	0.90118	25114	2
O15116;Q8VC85	O15116;Q8VC85	U6 snRNA-associated Sm-like protein LSm1	LSM1;Lsm1	2	2	2	24.1	15179	133	1.57E-36	14806	14656	33029	5	11584	1.39	45329	5	0.88804	10543	17312	5
O15118	O15118	Niemann-Pick C1 protein	NPC1	1	3	2	2.7	142.17	1278	5.83E-09	0.4899	0.51892	22913	6	0.51909	0.38868	46382	6	0.91907	0.95582	68.85	6
O15121	O15121	Sphingolipid delta(4)-desaturase DES1	DEGS1	1	2	2	9.9	37866	323	1.50E-05	0.497	0.44409	58851	3	0.78446	0.6785	25176	2	15297	16216	34113	2
O15126;Q8K021	O15126;Q8K021	Secretory carrier-associated membrane protein 1	SCAMP1;Scamp1	2	3	3	14.8	37.92	338	1.12E-10	0.60311	1008	12516	5	0.477	0.96816	13241	5	0.86386	0.91827	15019	5
O15127;Q9ERN0	O15127;Q9ERN0	Secretory carrier-associated membrane protein 2	SCAMP2;Scamp2	2	3	3	10	36648	329	1.31E-28	0.6844	0.9947	42589	4	0.56486	0.80613	38794	4	0.81347	0.8367	18.89	4
O15143	O15143	Actin-related protein 2/3 complex subunit 1B	ARPC1B	1	13	2	38.2	40949	372	2.08E-84	12214	12277	98508	7	0.79785	10278	37871	7	0.80284	0.86126	20191	7
Q9CVB6;O15144	Q9CVB6;O15144	Actin-related protein 2/3 complex subunit 2	Arpc2;ARPC2	2	14	14	37	34357	300	9.72E-70	11561	19622	31347	29	11001	15467	29164	29	0.80966	0.84517	35173	29
O15145	O15145	Actin-related protein 2/3 complex subunit 3	ARPC3	1	4	1	21.3	20546	178	2.82E-25	11538	10916	12132	3	11962	11502	10437	3	0.90233	10924	10168	3
O15160;P52432	O15160	DNA-directed RNA polymerases I and III subunit RPAC1	POLR1C	2	8	8	34.1	39249	346	1.29E-65	0.69371	0.69688	24015	13	0.69131	0.75829	39971	13	0.97021	10916	32621	13
O15162	O15162	Phospholipid scramblase 1	PLSCR1	1	3	3	13.2	35049	318	2.73E-10	33765	21906	37503	3	22185	13318	22485	3	0.7056	0.74594	61246	3
O15164;Q64127	O15164;Q64127	Transcription intermediary factor 1-alpha	TRIM24;Trim24	2	8	7	11.1	116.83	1050	9.97E-38	0.55883	0.51629	24146	6	0.42447	0.55314	42612	6	0.94622	0.99553	17973	6
Q80UU9;O15173	Q80UU9;O15173	Membrane-associated progesterone receptor component 2	Pgrmc2;PGRMC2	2	7	6	39.6	23334	217	1.06E-63	0.45216	0.89808	81063	4	0.786	12396	82092	4	15042	13776	42.15	4
O15182	O15182	Centrin-3	CETN3	1	1	1	12	19.55	167	1.56E-15	10044	0.77972	20.5	6	0.87386	0.80241	20943	6	0.84778	10171	36662	6
Q03958;O15212	Q03958;O15212	Prefoldin subunit 6	Pfdn6;PFDN6	2	6	6	48.8	14454	127	1.24E-43	16382	18968	24066	14	12369	16578	59306	14	0.84573	0.91257	41.85	14
O15213;Q9Z0H1	O15213	WD repeat-containing protein 46	WDR46	2	9	9	21.8	68.07	610	2.51E-25	0.37807	0.53274	19001	4	0.4098	0.47988	34785	4	0.9224	10663	31772	4
O15226;Q8BY02	O15226;Q8BY02	NF-kappa-B-repressing factor	NKRF;Nkrf	2	13	13	25.5	77672	690	1.10E-35	0.38596	0.77962	38239	6	0.3589	0.64712	33.76	6	0.87217	0.76243	29322	6
O15228	O15228	Dihydroxyacetone phosphate acyltransferase	GNPAT	1	2	2	2.2	77187	680	0.00010137	NaN	NaN	NaN	1	NaN	NaN	NaN	1	NaN	NaN	NaN	1
O15235;O35680	O15235;O35680	28S ribosomal protein S12, mitochondrial	MRPS12;Mrps12	2	2	2	26.1	15173	138	1.94E-06	0.4109	0.5566	30381	2	0.46193	0.63614	60883	2	12626	12535	28769	2
O15254	O15254	Peroxisomal acyl-coenzyme A oxidase 3	ACOX3	1	3	3	8.1	77628	700	8.24E-08	0.67268	0.69713	19374	4	0.61273	0.67548	57328	4	0.81253	0.98988	37367	4
Q9CQU3;O15258	Q9CQU3;O15258	Protein RER1	Rer1;RER1	2	4	4	24	22988	196	1.26E-28	0.59665	0.95788	35876	6	0.52668	0.99336	36149	6	0.97171	1025	10134	6
Q64310;O15260	Q64310;O15260	Surfeit locus protein 4	Surf4;SURF4	2	2	2	7.1	30381	269	3.10E-08	0.35915	0.41248	46846	6	0.41574	0.50311	37582	6	12259	12482	10109	6
O15269	O15269	Serine palmitoyltransferase 1	SPTLC1	1	7	7	19.7	52743	473	1.30E-21	NaN	NaN	NaN	1	NaN	NaN	NaN	1	NaN	NaN	NaN	1
O15270;P97363	O15270;P97363	Serine palmitoyltransferase 2	SPTLC2;Sptlc2	2	5	5	13.5	62924	562	1.31E-13	0.96836	12844	46657	2	0.92871	13303	44234	2	0.94933	0.97032	0.2374	2
O15294;Q8CGY8	O15294;Q8CGY8	UDP-N-acetylglucosamine--peptide N-acetylglucosaminyltransferase 110 kDa subunit	OGT;Ogt	2	21	21	26.6	116.92	1046	1.61E-85	0.50408	0.74742	24328	15	0.48276	0.69265	56137	15	0.79519	0.86064	48564	15
O15305;Q9Z2M7;O35621	O15305;Q9Z2M7	Phosphomannomutase 2	PMM2;Pmm2	3	9	8	36.6	28082	246	1.77E-24	12044	17688	42206	11	10488	18735	46924	11	11879	11001	50786	11
O15318	O15318	DNA-directed RNA polymerase III subunit RPC7	POLR3G	1	1	1	4.9	25914	223	0.0015328	NaN	NaN	NaN	1	NaN	NaN	NaN	1	NaN	NaN	NaN	1
O15327;Q6P1Y8	O15327;Q6P1Y8	Type II inositol 3,4-bisphosphate 4-phosphatase	INPP4B;Inpp4b	2	9	9	14.9	104.74	924	3.29E-22	11233	10517	26759	10	0.96146	10667	48533	10	0.97683	10285	32371	10
O15344;O70583	O15344;O70583	Midline-1	MID1;Mid1	2	9	9	14.1	75.25	667	1.37E-20	0.37706	0.77299	38171	3	0.60229	10859	14648	3	14419	13364	26746	3
O15347;O54879;P0C6E5	O15347;O54879	High mobility group protein B3	HMGB3;Hmgb3	3	6	6	26.5	22.98	200	3.12E-62	11232	13506	33927	13	0.81957	12673	19114	13	0.76019	0.86752	20342	13
O15355;Q61074	O15355	Protein phosphatase 1G	PPM1G	2	15	15	37.7	59271	546	3.55E-106	0.85372	0.9956	38202	20	0.82915	11401	40143	20	10595	11533	29135	20
O15357;Q6P549	O15357;Q6P549	Phosphatidylinositol 3,4,5-trisphosphate 5-phosphatase 2	INPPL1;Inppl1	2	17	17	18.5	138.6	1258	1.87E-43	0.69148	13625	21116	11	0.92988	12661	32749	11	0.94791	0.99794	25589	11
O70194;O15371	O70194;O15371	Eukaryotic translation initiation factor 3 subunit D	Eif3d;EIF3D	2	22	22	51.5	63988	548	5.31E-126	0.94909	12767	33056	22	0.98894	10827	38512	22	0.96391	10262	30161	22
O15372	O15372	Eukaryotic translation initiation factor 3 subunit H	EIF3H	1	9	2	22.7	39.93	352	2.04E-63	0.54971	11085	48.02	13	0.6713	12045	28453	13	0.95573	10491	13929	12
O88895;O15379	O88895;O15379	Histone deacetylase 3	Hdac3;HDAC3	2	1	1	4.2	48364	424	0.00073213	NaN	NaN	NaN	1	NaN	NaN	NaN	1	NaN	NaN	NaN	1
O15382	O15382	Branched-chain-amino-acid aminotransferase, mitochondrial	BCAT2	1	5	4	14	44287	392	9.30E-12	0.61825	0.71838	24205	8	0.69444	0.77849	33482	8	11209	12234	47159	8
O15392;O70201	O15392	Baculoviral IAP repeat-containing protein 5	BIRC5	2	4	4	43.7	16389	142	1.44E-16	0.33091	0.37895	35293	3	0.43643	0.52516	10888	3	12761	14581	17215	3
O15397;Q7TMY7	O15397	Importin-8	IPO8	2	5	5	7	119.94	1037	7.28E-14	0.6538	0.86702	23339	3	0.59274	0.72703	20985	3	0.99128	11225	36767	3
O15400;O70439	O15400;O70439	Syntaxin-7	STX7;Stx7	2	9	9	36.4	29815	261	1.07E-76	0.70518	10991	19364	13	0.70943	10039	39288	13	0.93594	10006	34141	13
O15403;B1AT66	O15403	Monocarboxylate transporter 7	SLC16A6	2	9	9	18	57393	523	3.98E-63	0.035158	0.060723	10539	7	0.033731	0.058052	46033	7	0.91912	10763	44744	7
O15431;Q8K211	O15431;Q8K211	High affinity copper uptake protein 1	SLC31A1;Slc31a1	2	2	2	15.8	21.09	190	6.96E-07	NaN	NaN	NaN	1	NaN	NaN	NaN	1	NaN	NaN	NaN	1
O15439	O15439	Multidrug resistance-associated protein 4	ABCC4	1	6	6	6.6	149.52	1325	2.46E-13	0.34011	0.66216	19803	2	0.17683	0.35496	65411	2	0.46448	0.46626	19699	2
O15440;Q9R1X5;Q96J65;Q80WJ6;Q96J66	O15440	Multidrug resistance-associated protein 5	ABCC5	5	10	10	10.4	160.66	1437	3.46E-31	0.22437	0.32177	43553	2	0.18278	0.26962	79183	2	0.87256	0.94207	10163	2
O15446	O15446	DNA-directed RNA polymerase I subunit RPA34	CD3EAP	1	8	8	35.1	54985	510	7.20E-42	0.72221	0.69528	20882	3	0.68463	0.7702	26.74	3	0.97418	10201	93161	3
O15455	O15455	Toll-like receptor 3	TLR3	1	3	3	4.9	103.83	904	2.73E-07	10663	0.94685	37919	2	0.84851	0.81234	28262	2	0.92966	10358	15402	2
O15460;Q60716	O15460	Prolyl 4-hydroxylase subunit alpha-2	P4HA2	2	10	10	26	60901	535	1.94E-61	0.70593	13349	36212	6	0.5201	0.85257	125.46	6	0.74344	0.64194	113.45	6
O15479;O15481;Q96LZ2;P43366;Q9UBF1	O15479	Melanoma-associated antigen B2	MAGEB2	5	9	8	34.8	35277	319	4.84E-26	0.81773	0.93857	16193	12	0.7665	0.94534	41665	12	0.96815	10429	33.11	12
O15498	O15498	Synaptobrevin homolog YKT6	YKT6	1	4	2	24.2	22417	198	3.41E-12	18591	15815	40109	5	14122	12337	49218	5	0.81227	0.69205	29072	5
O15504;Q8CIC2	O15504	Nucleoporin-like protein 2	NUPL2	2	3	3	9.7	44871	423	1.83E-06	NaN	NaN	NaN	0	NaN	NaN	NaN	0	NaN	NaN	NaN	0
O15511	O15511	Actin-related protein 2/3 complex subunit 5	ARPC5	1	8	1	61.6	16.32	151	1.32E-42	20751	2279	46137	8	18487	22296	50101	8	0.80868	0.90327	17224	8
O15530;Q9Z2A0;Q6A1A2	O15530;Q9Z2A0;Q6A1A2	3-phosphoinositide-dependent protein kinase 1;Putative 3-phosphoinositide-dependent protein kinase 2	PDPK1;Pdpk1;PDPK2	3	5	5	11.9	63151	556	3.80E-12	0.87499	17304	20763	5	0.93237	18705	43.95	5	10366	0.97694	31931	5
O15533	O15533	Tapasin	TAPBP	1	2	2	4.9	47625	448	5.93E-05	NaN	NaN	NaN	0	NaN	NaN	NaN	0	NaN	NaN	NaN	0
O15540	O15540	Fatty acid-binding protein, brain	FABP7	1	2	2	20.5	14889	132	0.00010155	17917	24999	57148	2	19271	26072	17662	2	11222	10897	13943	2
O15541	O15541	RING finger protein 113A	RNF113A	1	2	2	9.3	38787	343	1.09E-06	0.6827	13926	27817	3	0.54694	0.9414	22941	3	0.74256	0.73543	21683	3
O35114	O35114	Lysosome membrane protein 2	Scarb2	1	3	2	7.9	54043	478	8.36E-11	NaN	NaN	NaN	0	NaN	NaN	NaN	0	NaN	NaN	NaN	0
O35126;P54259	O35126;P54259	Atrophin-1	Atn1;ATN1	2	3	3	3.7	123.72	1175	6.32E-09	NaN	NaN	NaN	1	NaN	NaN	NaN	1	NaN	NaN	NaN	1
Q99622;O35127	Q99622;O35127	Protein C10	C12orf57;Grcc10	2	2	2	26.2	13178	126	6.82E-12	NaN	NaN	NaN	0	NaN	NaN	NaN	0	NaN	NaN	NaN	0
Q99623;O35129	Q99623;O35129	Prohibitin-2	PHB2;Phb2	2	14	14	47.2	33296	299	7.28E-75	0.65601	0.7004	23.35	42	0.59071	0.7816	30.52	41	12289	12459	24067	42
O35206;P39059	O35206	Collagen alpha-1(XV) chain;Endostatin	Col15a1	2	8	8	6.4	140.47	1367	4.19E-22	NaN	NaN	NaN	0	NaN	NaN	NaN	0	NaN	NaN	NaN	0
O35226	O35226	26S proteasome non-ATPase regulatory subunit 4	Psmd4	1	6	1	26.1	40703	376	9.62E-38	NaN	NaN	NaN	0	NaN	NaN	NaN	0	NaN	NaN	NaN	0
O35245;Q13563	O35245;Q13563	Polycystin-2	Pkd2;PKD2	2	2	2	2.3	108.98	966	4.80E-05	NaN	NaN	NaN	0	NaN	NaN	NaN	0	NaN	NaN	NaN	0
O43143;O35286	O43143;O35286	Putative pre-mRNA-splicing factor ATP-dependent RNA helicase DHX15	DHX15;Dhx15	2	31	30	41.5	90932	795	8.74E-147	0.59147	0.69119	28319	76	0.50601	0.64517	43241	77	0.89679	0.96893	37502	76
O35309	O35309	N-myc-interactor	Nmi	1	1	1	5.7	35235	314	0.00091561	NaN	NaN	NaN	0	NaN	NaN	NaN	0	NaN	NaN	NaN	0
P40426;O35317;P41778;P40424	P40426;O35317;P41778;P40424	Pre-B-cell leukemia transcription factor 3;Pre-B-cell leukemia transcription factor 1	PBX3;Pbx3;Pbx1;PBX1	4	2	1	10.4	47189	434	1.18E-08	NaN	NaN	NaN	0	NaN	NaN	NaN	0	NaN	NaN	NaN	0
O35350	O35350	Calpain-1 catalytic subunit	Capn1	1	9	4	13.5	82105	713	6.93E-32	NaN	NaN	NaN	0	NaN	NaN	NaN	0	NaN	NaN	NaN	0
O35381;Q64G17;O95626	O35381	Acidic leucine-rich nuclear phosphoprotein 32 family member A	Anp32a	3	7	3	30	28537	247	3.76E-18	NaN	NaN	NaN	0	NaN	NaN	NaN	0	NaN	NaN	NaN	0
O35382	O35382	Exocyst complex component 4	Exoc4	1	12	1	16.5	110.54	975	1.56E-46	NaN	NaN	NaN	0	NaN	NaN	NaN	0	NaN	NaN	NaN	0
Q99942;O35445	Q99942;O35445	E3 ubiquitin-protein ligase RNF5	RNF5;Rnf5	2	1	1	9.4	19881	180	5.62E-06	NaN	NaN	NaN	0	NaN	NaN	NaN	0	NaN	NaN	NaN	0
Q9UMR5;O35448	Q9UMR5;O35448	Lysosomal thioesterase PPT2	PPT2;Ppt2	2	1	1	4.6	34225	302	0.0010958	16182	12433	19631	2	1821	14355	42239	2	10322	10669	46978	2
Q9H2E6;O35464;O54951;Q9H3T3	Q9H2E6;O35464	Semaphorin-6A	SEMA6A;Sema6a	4	3	3	4.2	114.39	1030	1.53E-06	NaN	NaN	NaN	1	NaN	NaN	NaN	1	NaN	NaN	NaN	1
O35601	O35601	FYN-binding protein	Fyb	1	2	2	4.3	90054	819	1.34E-20	NaN	NaN	NaN	0	NaN	NaN	NaN	0	NaN	NaN	NaN	0
Q13873;O35607	Q13873;O35607	Bone morphogenetic protein receptor type-2	BMPR2;Bmpr2	2	1	1	2.4	115.2	1038	0.0011283	NaN	NaN	NaN	0	NaN	NaN	NaN	0	NaN	NaN	NaN	0
Q8N3U4;O35638	Q8N3U4;O35638	Cohesin subunit SA-2	STAG2;Stag2	2	15	9	13.9	141.32	1231	2.02E-36	0.64097	0.6222	41111	7	0.66727	0.69709	64245	7	0.88738	0.91367	32778	7
O35639;P12429	O35639	Annexin A3	Anxa3	2	9	9	29.7	36384	323	1.14E-41	NaN	NaN	NaN	0	NaN	NaN	NaN	0	NaN	NaN	NaN	0
O35643	O35643	AP-1 complex subunit beta-1	Ap1b1	1	27	1	33.5	103.93	943	2.19E-156	NaN	NaN	NaN	0	NaN	NaN	NaN	0	NaN	NaN	NaN	0
O35658	O35658	Complement component 1 Q subcomponent-binding protein, mitochondrial	C1qbp	1	2	1	14.4	31013	278	5.09E-06	NaN	NaN	NaN	0	NaN	NaN	NaN	0	NaN	NaN	NaN	0
O35678	O35678	Monoglyceride lipase	Mgll	1	4	4	17.2	33387	303	6.42E-09	NaN	NaN	NaN	0	NaN	NaN	NaN	0	NaN	NaN	NaN	0
O35685	O35685	Nuclear migration protein nudC	Nudc	1	14	3	43.1	38358	332	8.61E-58	NaN	NaN	NaN	0	NaN	NaN	NaN	0	NaN	NaN	NaN	0
Q06587;O35730	Q06587;O35730	E3 ubiquitin-protein ligase RING1	RING1;Ring1	2	7	5	22.9	42429	406	7.33E-17	0.68969	0.64384	36372	7	0.4413	0.64675	51.03	7	0.92692	0.97903	20445	7
O35744;Q91Z98	O35744	Chitinase-3-like protein 3	Chi3l3	2	12	12	42.7	44458	398	8.92E-47	NaN	NaN	NaN	0	NaN	NaN	NaN	0	NaN	NaN	NaN	0
O35855	O35855	Branched-chain-amino-acid aminotransferase, mitochondrial	Bcat2	1	7	6	21.9	44127	393	3.78E-30	NaN	NaN	NaN	1	NaN	NaN	NaN	1	NaN	NaN	NaN	1
Q92905;O35864	Q92905;O35864	COP9 signalosome complex subunit 5	COPS5;Cops5	2	14	14	55.4	37578	334	3.37E-49	14408	16434	17732	8	14799	17429	17313	8	10752	1094	11297	8
O35887	O35887	Calumenin	Calu	1	16	2	46	37063	315	5.25E-227	NaN	NaN	NaN	1	NaN	NaN	NaN	1	NaN	NaN	NaN	1
Q9Y333;O35900	Q9Y333;O35900	U6 snRNA-associated Sm-like protein LSm2	LSM2;Lsm2	2	6	6	68.4	10834	95	7.48E-33	0.61615	0.89725	37868	6	0.67001	10401	16268	6	10542	10567	17262	6
P40425;O35984	P40425;O35984	Pre-B-cell leukemia transcription factor 2	PBX2;Pbx2	2	2	1	10.9	45881	430	2.25E-23	NaN	NaN	NaN	1	NaN	NaN	NaN	1	NaN	NaN	NaN	1
O43148;Q9D0L8	O43148	mRNA cap guanine-N7 methyltransferase	RNMT	2	10	10	28.6	54843	476	3.66E-47	0.76666	11274	18614	6	0.72907	11089	34042	6	0.99684	10319	13758	5
O43149;Q5SSH7	O43149;Q5SSH7	Zinc finger ZZ-type and EF-hand domain-containing protein 1	ZZEF1;Zzef1	2	4	4	1.8	331.07	2961	4.33E-10	1531	15334	25.06	3	12613	14503	14853	3	0.85863	10234	31771	3
O43156;Q91V83	O43156	TELO2-interacting protein 1 homolog	TTI1	2	3	3	4	122.07	1089	2.58E-09	NaN	NaN	NaN	0	NaN	NaN	NaN	0	NaN	NaN	NaN	0
O43159	O43159	Ribosomal RNA-processing protein 8	RRP8	1	10	8	29.6	50714	456	2.89E-54	0.34839	0.50853	36444	6	0.25777	0.2977	84257	6	0.54011	0.62003	84653	6
O43169	O43169	Cytochrome b5 type B	CYB5B	1	4	4	31.5	16332	146	1.34E-18	0.84479	17965	69422	11	0.91874	13023	121.77	11	0.69828	0.57616	81.96	11
O43172;Q9DAW6	O43172;Q9DAW6	U4/U6 small nuclear ribonucleoprotein Prp4	PRPF4;Prpf4	2	14	14	36.4	58449	522	2.92E-51	0.56993	0.61808	36957	19	0.58235	0.53471	32081	19	0.98081	10697	28201	19
O43175	O43175	D-3-phosphoglycerate dehydrogenase	PHGDH	1	21	6	44.3	56.65	533	5.86E-150	0.92826	10279	19708	38	0.85038	12074	42529	38	0.98501	1081	29999	38
O43237;Q6PDL0	O43237;Q6PDL0	Cytoplasmic dynein 1 light intermediate chain 2	DYNC1LI2;Dync1li2	2	11	10	29.9	54099	492	4.68E-64	0.8036	16344	45215	9	10312	17577	47789	10	1.07	10655	26.68	10
O43242	O43242	26S proteasome non-ATPase regulatory subunit 3	PSMD3	1	28	4	48.3	60977	534	2.70E-149	0.86605	12247	31428	43	0.86459	12309	61419	43	10639	10718	48294	43
O43251;Q8BP71;Q9JJ43;Q9NWB1;A6NFN3;Q8BIF2	O43251;Q8BP71;Q9JJ43;Q9NWB1	RNA binding protein fox-1 homolog 2;RNA binding protein fox-1 homolog 1	RBFOX2;Rbfox2;Rbfox1;RBFOX1	6	5	5	20.3	41373	390	5.29E-32	NaN	NaN	NaN	1	NaN	NaN	NaN	1	NaN	NaN	NaN	1
O43252;Q60967;O95340	O43252;Q60967	Bifunctional 3-phosphoadenosine 5-phosphosulfate synthase 1;Sulfate adenylyltransferase;Adenylyl-sulfate kinase	PAPSS1;Papss1	3	10	9	21.6	70832	624	5.72E-35	0.68983	14289	52932	12	0.88742	15424	66036	12	0.8257	0.96544	36573	12
Q8R331;O43257	Q8R331;O43257	Zinc finger HIT domain-containing protein 1	Znhit1;ZNHIT1	2	1	1	14.9	17504	154	8.71E-15	NaN	NaN	NaN	0	NaN	NaN	NaN	0	NaN	NaN	NaN	0
O43264	O43264	Centromere/kinetochore protein zw10 homolog	ZW10	1	13	9	25	88828	779	3.44E-57	0.96537	11949	26907	12	0.79945	11391	32621	12	0.88052	0.98119	30088	12
O43278;Q9R097	O43278	Kunitz-type protease inhibitor 1	SPINT1	2	3	3	6.8	58397	529	5.30E-09	NaN	NaN	NaN	1	NaN	NaN	NaN	1	NaN	NaN	NaN	1
O43286;Q9JMK0	O43286;Q9JMK0	Beta-1,4-galactosyltransferase 5	B4GALT5;B4galt5	2	4	4	11.6	45118	388	2.20E-10	NaN	NaN	NaN	0	NaN	NaN	NaN	0	NaN	NaN	NaN	0
O43290;Q9Z315	O43290	U4/U6.U5 tri-snRNP-associated protein 1	SART1	2	17	17	29.4	90254	800	5.12E-138	0.50844	0.69455	63802	15	0.48065	0.6383	51592	15	0.91138	0.95983	29638	15
O43294;Q62219	O43294;Q62219	Transforming growth factor beta-1-induced transcript 1 protein	TGFB1I1;Tgfb1i1	2	4	4	13.4	49814	461	8.26E-27	35397	36084	11681	3	25149	27011	35052	3	0.63183	0.67879	24279	3
O43299;Q3U829	O43299	AP-5 complex subunit zeta-1	AP5Z1	2	5	5	8.2	88604	807	2.11E-17	0.77828	10558	30527	4	0.77391	10508	32436	4	0.82369	0.84657	32707	4
O43301;Q8K0U4	O43301;Q8K0U4	Heat shock 70 kDa protein 12A	HSPA12A;Hspa12a	2	7	7	13	74977	675	6.23E-16	0.83167	14892	36575	7	0.87411	14072	26274	7	0.8604	0.91444	22661	7
O43314	O43314	Inositol hexakisphosphate and diphosphoinositol-pentakisphosphate kinase 2	PPIP5K2	1	2	2	3.3	140.41	1243	5.65E-27	NaN	NaN	NaN	1	NaN	NaN	NaN	1	NaN	NaN	NaN	1
Q62073;O43318	Q62073;O43318	Mitogen-activated protein kinase kinase kinase 7	Map3k7;MAP3K7	2	3	3	8.3	64227	579	1.18E-09	10206	13664	21775	4	0.9574	13322	42743	4	0.80148	0.93227	35291	4
O43324;Q9D1M4	O43324	Eukaryotic translation elongation factor 1 epsilon-1	EEF1E1	2	7	7	48.9	19.81	174	2.98E-37	0.83592	0.9172	27667	10	0.95073	10325	55288	10	10327	10488	39999	10
O43353	O43353	Receptor-interacting serine/threonine-protein kinase 2	RIPK2	1	1	1	3.9	61194	540	6.46E-23	NaN	NaN	NaN	0	NaN	NaN	NaN	0	NaN	NaN	NaN	0
O43390	O43390	Heterogeneous nuclear ribonucleoprotein R	HNRNPR	1	29	21	47.2	70942	633	2.89E-162	0.47816	0.81613	26269	59	0.53605	0.67705	49776	59	0.80394	0.91883	50681	59
Q922U1;O43395	Q922U1;O43395	U4/U6 small nuclear ribonucleoprotein Prp3	Prpf3;PRPF3	2	11	11	22.7	77454	683	3.71E-47	0.51817	0.94701	32934	13	0.63618	0.98684	47973	13	10912	10511	38804	13
O43396;Q8CDN6	O43396;Q8CDN6	Thioredoxin-like protein 1	TXNL1;Txnl1	2	12	12	50.2	32251	289	9.18E-87	15904	15554	17191	24	15018	17656	41329	24	0.95936	10569	37504	24
O43399	O43399	Tumor protein D54	TPD52L2	1	10	5	51.9	22237	206	2.53E-76	0.8177	11225	35222	12	0.72699	0.99551	42022	12	0.82526	0.91995	28402	12
O43402;O70378	O43402;O70378	ER membrane protein complex subunit 8	EMC8;Emc8	2	6	6	36.2	23773	210	3.12E-16	0.88773	0.85558	15593	4	0.89494	0.9432	22764	4	1146	11853	10476	4
O43422;Q9CUX1	O43422;Q9CUX1	52 kDa repressor of the inhibitor of the protein kinase	PRKRIR;Prkrir	2	2	2	3.4	87703	761	2.80E-05	NaN	NaN	NaN	0	NaN	NaN	NaN	0	NaN	NaN	NaN	0
O43426;Q8CHC4	O43426;Q8CHC4	Synaptojanin-1	SYNJ1;Synj1	2	3	3	2.6	173.1	1573	9.92E-08	NaN	NaN	NaN	1	NaN	NaN	NaN	1	NaN	NaN	NaN	1
Q9JI19;O43427	Q9JI19;O43427	Acidic fibroblast growth factor intracellular-binding protein	Fibp;FIBP	2	2	2	7.8	41204	357	9.74E-06	NaN	NaN	NaN	1	NaN	NaN	NaN	1	NaN	NaN	NaN	1
O43432	O43432	Eukaryotic translation initiation factor 4 gamma 3	EIF4G3	1	11	5	9.3	176.65	1585	2.35E-35	1033	13381	88625	2	0.31769	0.45753	127.79	2	0.31876	0.35869	105.89	2
O43439;Q61909;O70374;Q06455;O54972;O75081	O43439	Protein CBFA2T2	CBFA2T2	6	3	3	8.6	67132	604	4.82E-09	0.6701	0.60441	22.08	2	0.65311	0.65727	21669	2	0.76396	0.90278	48118	2
O43447;Q9D868	O43447;Q9D868	Peptidyl-prolyl cis-trans isomerase H	PPIH;Ppih	2	7	7	32.2	19208	177	4.82E-17	0.60906	11173	19175	9	0.83658	13551	20246	9	13363	10917	20151	9
O54864;O43463	O54864;O43463	Histone-lysine N-methyltransferase SUV39H1	Suv39h1;SUV39H1	2	1	1	2.7	47754	412	3.72E-05	NaN	NaN	NaN	0	NaN	NaN	NaN	0	NaN	NaN	NaN	0
O43488;Q8NHP1;Q8CG76;O95154	O43488;Q8NHP1	Aflatoxin B1 aldehyde reductase member 2;Aflatoxin B1 aldehyde reductase member 4	AKR7A2;AKR7L	4	5	5	17.8	39589	359	3.89E-30	10058	15254	24.3	5	0.83054	12119	37913	5	0.89695	10127	36481	5
O43491	O43491	Band 4.1-like protein 2	EPB41L2	1	35	21	45.5	112.59	1005	4.11E-245	0.4195	0.52007	30912	35	0.37713	0.50502	28.39	35	0.89151	10121	30216	35
O43493	O43493	Trans-Golgi network integral membrane protein 2	TGOLN2	1	6	6	15.6	51112	480	2.98E-65	NaN	NaN	NaN	1	NaN	NaN	NaN	1	NaN	NaN	NaN	1
O43502	O43502	DNA repair protein RAD51 homolog 3	RAD51C	1	1	1	5.9	42189	376	3.59E-05	NaN	NaN	NaN	1	NaN	NaN	NaN	1	NaN	NaN	NaN	1
O43504	O43504	Ragulator complex protein LAMTOR5	LAMTOR5	1	4	1	85.7	96138	91	1.44E-47	0.842	0.92502	12606	7	0.90215	10267	15708	7	0.97827	11149	18752	7
O43567;O54965	O43567;O54965	E3 ubiquitin-protein ligase RNF13	RNF13;Rnf13	2	3	3	11.5	42813	381	1.56E-06	NaN	NaN	NaN	1	NaN	NaN	NaN	1	NaN	NaN	NaN	1
O88845;O43572	O88845;O43572	A-kinase anchor protein 10, mitochondrial	Akap10;AKAP10	2	2	2	5.1	73631	662	4.70E-05	NaN	NaN	NaN	1	NaN	NaN	NaN	1	NaN	NaN	NaN	1
O43583;Q9CQJ6	O43583;Q9CQJ6	Density-regulated protein	DENR;Denr	2	6	6	37.4	22092	198	8.24E-97	12902	17634	17841	8	10746	14357	19965	8	0.81629	0.90996	15844	8
O43592;Q9CRT8	O43592;Q9CRT8	Exportin-T	XPOT;Xpot	2	16	16	18.9	109.96	962	1.86E-50	0.54726	10292	21296	11	0.51174	0.98721	67754	11	0.88466	0.94421	63187	11
O43598	O43598	2-deoxynucleoside 5-phosphate N-hydrolase 1	DNPH1	1	4	4	25.3	19108	174	1.25E-09	39768	33258	48553	5	39863	28197	71106	5	0.8931	0.93843	39493	5
O43615;O35857	O43615	Mitochondrial import inner membrane translocase subunit TIM44	TIMM44	2	16	16	39.6	51355	452	7.36E-75	0.56364	0.72319	30958	22	0.57102	0.73281	25292	22	10418	11926	24379	22
O43617;O55013	O43617;O55013	Trafficking protein particle complex subunit 3	TRAPPC3;Trappc3	2	4	4	20.6	20274	180	7.74E-19	0.74907	14812	23283	5	11706	15411	35211	5	0.95368	10208	22615	5
O43633;Q9DB34	O43633;Q9DB34	Charged multivesicular body protein 2a	CHMP2A;Chmp2a	2	3	3	17.1	25104	222	3.21E-08	NaN	NaN	NaN	1	NaN	NaN	NaN	1	NaN	NaN	NaN	1
O55033;O43639	O55033;O43639	Cytoplasmic protein NCK2	Nck2;NCK2	2	5	3	11.8	42879	380	9.58E-17	0.73992	14484	18524	3	0.95762	13942	47047	3	11895	10719	38841	3
O43660;Q922V4	O43660;Q922V4	Pleiotropic regulator 1	PLRG1;Plrg1	2	11	11	30.9	57193	514	1.65E-78	0.79051	0.74056	22081	12	0.75385	0.78719	24224	12	0.9162	0.99998	13526	12
O43663;Q99K43	O43663	Protein regulator of cytokinesis 1	PRC1	2	7	7	16.6	71606	620	2.15E-60	0.51126	0.51777	36153	7	0.39055	0.40645	39217	7	0.79962	0.87211	36865	7
O43665;Q9CQE5	O43665	Regulator of G-protein signaling 10	RGS10	2	5	5	31.8	20236	173	1.39E-17	0.98516	14561	36576	4	0.82405	11284	26906	4	0.89004	0.86504	5539	4
O43670	O43670	Zinc finger protein 207	ZNF207	1	2	2	5.4	50.75	478	0.00013684	12265	0.93174	26597	4	0.62314	0.52245	35339	4	0.48318	0.51425	45848	4
O43674	O43674	NADH dehydrogenase [ubiquinone] 1 beta subcomplex subunit 5, mitochondrial	NDUFB5	1	1	1	6.9	21.75	189	7.62E-05	NaN	NaN	NaN	0	NaN	NaN	NaN	0	NaN	NaN	NaN	0
O43676;Q9CQZ6	O43676;Q9CQZ6	NADH dehydrogenase [ubiquinone] 1 beta subcomplex subunit 3	NDUFB3;Ndufb3	2	2	2	17.3	11402	98	6.81E-07	NaN	NaN	NaN	1	NaN	NaN	NaN	1	NaN	NaN	NaN	1
O43677	O43677	NADH dehydrogenase [ubiquinone] 1 subunit C1, mitochondrial	NDUFC1	1	2	2	27.6	87341	76	9.36E-06	0.45038	0.41901	71312	4	0.5341	0.78368	72699	4	0.84957	0.97187	57153	4
O43678	O43678	NADH dehydrogenase [ubiquinone] 1 alpha subcomplex subunit 2	NDUFA2	1	1	1	21.2	10921	99	4.28E-24	NaN	NaN	NaN	0	NaN	NaN	NaN	0	NaN	NaN	NaN	0
O43681;O54984	O43681;O54984	ATPase ASNA1;ATPase Asna1	ASNA1;Asna1	2	10	10	38.5	38792	348	4.48E-40	11913	11893	23377	12	0.87094	0.9567	67808	12	0.82015	0.87629	54449	12
O43683	O43683	Mitotic checkpoint serine/threonine-protein kinase BUB1	BUB1	1	3	3	5.4	122.37	1085	7.51E-17	0.89998	12896	26737	3	0.567	0.71405	45905	3	0.71448	0.82737	28029	3
Q9WVA3;O43684	Q9WVA3;O43684	Mitotic checkpoint protein BUB3	Bub3;BUB3	2	11	11	29.4	36954	326	5.80E-39	0.52657	0.81409	47582	12	0.55668	0.89892	46287	12	0.77842	0.84907	65396	12
O43688	O43688	Lipid phosphate phosphohydrolase 2	PPAP2C	1	1	1	5.2	32573	288	0.0010258	NaN	NaN	NaN	0	NaN	NaN	NaN	0	NaN	NaN	NaN	0
O43707	O43707	Alpha-actinin-4	ACTN4	1	54	10	62.7	104.85	911	0	14831	13221	32696	184	1115	11975	52151	183	0.82565	0.90147	42188	184
O43709	O43709	Uncharacterized methyltransferase WBSCR22	WBSCR22	1	1	1	4.3	31.88	281	0.0012051	0.68715	0.86717	14141	2	0.8554	10374	19377	2	12268	11528	38929	2
O43715;Q9D8Z2	O43715;Q9D8Z2	TP53-regulated inhibitor of apoptosis 1	TRIAP1;Triap1	2	3	3	46.1	87858	76	7.49E-15	0.61634	0.59457	0.19075	2	0.55489	0.60807	31456	2	0.93673	1077	0.68812	2
O43716	O43716	Glutamyl-tRNA(Gln) amidotransferase subunit C, mitochondrial	GATC	1	2	2	22.1	15086	136	2.74E-05	NaN	NaN	NaN	1	NaN	NaN	NaN	1	NaN	NaN	NaN	1
O43719;Q8BGC0	O43719	HIV Tat-specific factor 1	HTATSF1	2	15	15	26.8	85852	755	2.07E-59	0.65449	0.86899	46712	9	0.50325	0.83777	46225	9	10639	10311	30058	9
O43736;Q61500	O43736;Q61500	Integral membrane protein 2A	ITM2A;Itm2a	2	4	4	15.2	29741	263	8.48E-15	NaN	NaN	NaN	0	NaN	NaN	NaN	0	NaN	NaN	NaN	0
O43739;O08967;Q9UIA0;Q9QX11;Q15438;Q99418;P63034	O43739;O08967	Cytohesin-3	CYTH3;Cyth3	7	4	3	16.5	46348	400	8.57E-09	1738	18841	22135	6	1539	16377	42008	6	0.85834	0.96897	23599	6
O43745	O43745	Calcineurin B homologous protein 2	CHP2	1	1	1	4.1	22452	196	0.012102	0.81254	0.89923	14167	2	0.80498	0.82964	15577	2	0.98232	0.92115	12242	2
P22892;O43747	P22892;O43747	AP-1 complex subunit gamma-1	Ap1g1;AP1G1	2	20	20	26.9	91349	822	8.22E-84	0.77703	12267	36575	20	0.70128	11198	62816	20	0.90848	0.96636	40154	20
O43752;Q9JKK1	O43752	Syntaxin-6	STX6	2	4	4	20	29176	255	4.45E-24	0.34029	0.52167	30821	4	0.30111	0.45822	30.43	4	0.96427	0.90756	14926	4
O43759;O55100	O43759;O55100	Synaptogyrin-1	SYNGR1;Syngr1	2	1	1	5.2	25455	233	0.0014498	NaN	NaN	NaN	0	NaN	NaN	NaN	0	NaN	NaN	NaN	0
O43760	O43760	Synaptogyrin-2	SYNGR2	1	1	1	3.6	24.81	224	0.00056183	NaN	NaN	NaN	1	NaN	NaN	NaN	1	NaN	NaN	NaN	1
O43765;Q8BJU0	O43765;Q8BJU0	Small glutamine-rich tetratricopeptide repeat-containing protein alpha	SGTA;Sgta	2	8	8	27.8	34063	313	1.13E-44	13632	14792	30384	11	11964	14137	70053	11	0.97646	0.96789	46427	11
O43768;P60840	O43768;P60840	Alpha-endosulfine	ENSA;Ensa	2	5	4	53.7	13389	121	3.85E-14	1.07	13957	18.4	4	1356	17543	91526	4	12726	12087	15868	4
O43776	O43776	Asparagine--tRNA ligase, cytoplasmic	NARS	1	22	13	37.6	62942	548	1.38E-109	0.85715	12895	29814	45	0.73863	12244	59461	45	0.86255	0.92641	47188	45
O43795;P46735;Q9D6A1;Q8N1T3	O43795;P46735	Unconventional myosin-Ib	MYO1B;Myo1b	4	26	22	27.9	131.98	1136	1.20E-84	0.3109	0.47877	27685	16	0.35695	0.4096	51999	16	10408	10157	49653	16
O43808;O70579	O43808	Peroxisomal membrane protein PMP34	SLC25A17	2	3	3	10.4	34566	307	1.78E-15	NaN	NaN	NaN	1	NaN	NaN	NaN	1	NaN	NaN	NaN	1
O43809;Q9CQF3	O43809;Q9CQF3	Cleavage and polyadenylation specificity factor subunit 5	NUDT21;Nudt21	2	9	9	37.4	26227	227	1.45E-36	0.56294	0.75372	32.92	17	0.57506	0.81795	34.42	17	10136	1016	33.98	17
O43813;O89112	O43813	LanC-like protein 1	LANCL1	2	4	4	11	45283	399	6.27E-11	24907	28684	44877	5	21774	29571	34846	5	0.90224	0.99031	30701	5
O43815;O55106	O43815;O55106	Striatin	STRN;Strn	2	8	8	18.2	86131	780	4.74E-21	0.80239	15242	27593	7	0.46394	0.8744	54227	7	0.55813	0.5452	48.07	7
O43818;Q91WM3	O43818	U3 small nucleolar RNA-interacting protein 2	RRP9	2	9	9	21.7	51.84	475	1.03E-21	0.71526	0.81586	34223	5	0.71033	0.849	35796	5	11382	11465	81361	5
O43823	O43823	A-kinase anchor protein 8	AKAP8	1	12	10	29.9	76107	692	1.17E-120	0.65663	0.69806	22749	12	0.56406	0.84766	33406	12	0.95664	10927	23298	12
O43824	O43824	Putative GTP-binding protein 6	GTPBP6	1	3	3	7.9	56883	516	7.94E-08	0.75562	0.79643	29408	4	0.81377	0.9228	73258	4	10832	12633	22525	4
O43837	O43837	Isocitrate dehydrogenase [NAD] subunit beta, mitochondrial	IDH3B	1	16	16	48.6	42183	385	3.36E-78	0.7667	0.86717	51109	31	0.80941	0.99909	66656	31	11191	11854	38075	30
O43847	O43847	Nardilysin	NRD1	1	21	8	20	131.57	1150	1.24E-53	13682	14403	29897	17	10086	12959	35217	17	0.78149	0.84595	29303	17
O43852	O43852	Calumenin	CALU	1	19	5	58.1	37106	315	1.97E-260	0.61897	0.64427	32.34	95	0.66488	0.71305	44487	95	10873	11797	37356	94
Q80SW1;O43865	Q80SW1;O43865	Putative adenosylhomocysteinase 2	Ahcyl1;AHCYL1	2	14	6	28.7	58951	530	8.60E-59	0.58266	12357	25528	19	0.80295	13009	36879	19	0.93437	0.92619	29418	19
O43913;Q9WUV0	O43913;Q9WUV0	Origin recognition complex subunit 5	ORC5;Orc5	2	4	4	8.5	50282	435	5.78E-13	0.65559	0.50935	25828	2	0.71025	0.6362	39433	2	0.95506	10882	17027	2
O43920	O43920	NADH dehydrogenase [ubiquinone] iron-sulfur protein 5	NDUFS5	1	4	4	37.7	12517	106	2.62E-12	0.73962	11719	16985	4	0.43037	0.62683	87829	4	0.6833	0.66051	79205	4
O43929;O88708;CON__Q2YDI2;Q96NJ5	O43929	Origin recognition complex subunit 4	ORC4	4	5	5	12.6	50377	436	1.52E-11	0.30302	0.63002	11986	3	0.41376	0.66826	44069	3	0.89068	1027	62177	3
O54724	O54724	Polymerase I and transcript release factor	Ptrf	1	13	4	47.2	43953	392	4.41E-90	90121	18.45	81428	6	33873	5247	101.32	7	0.36064	0.36754	28586	7
O54734	O54734	Dolichyl-diphosphooligosaccharide--protein glycosyltransferase 48 kDa subunit	Ddost	1	10	1	22.2	49027	441	3.31E-53	0.56255	10631	57904	13	0.51804	0.78732	20.75	13	10079	0.83396	49733	13
O54931	O54931	A-kinase anchor protein 2	Akap2	1	9	1	14.9	98577	893	9.52E-37	NaN	NaN	NaN	0	NaN	NaN	NaN	0	NaN	NaN	NaN	0
Q12982;O54940;Q86WG3;Q8BHE3	Q12982;O54940;Q86WG3;Q8BHE3	BCL2/adenovirus E1B 19 kDa protein-interacting protein 2;Caytaxin	BNIP2;Bnip2;ATCAY;Atcay	4	2	2	8	36017	314	1.24E-06	13938	12486	42738	7	1197	12492	36405	7	0.74984	0.86832	40298	7
O75190;O54946;Q8WWF6;Q8NHS0;Q9QYI5	O75190;O54946	DnaJ homolog subfamily B member 6	DNAJB6;Dnajb6	5	3	2	11	36087	326	3.79E-13	NaN	NaN	NaN	0	NaN	NaN	NaN	0	NaN	NaN	NaN	0
O54950;P54619	O54950;P54619	5-AMP-activated protein kinase subunit gamma-1	Prkag1;PRKAG1	2	5	5	19.4	37.52	330	1.48E-12	NaN	NaN	NaN	1	NaN	NaN	NaN	1	NaN	NaN	NaN	1
O54988	O54988	STE20-like serine/threonine-protein kinase	Slk	1	7	1	6.4	141.46	1233	2.70E-19	NaN	NaN	NaN	0	NaN	NaN	NaN	0	NaN	NaN	NaN	0
O55029	O55029	Coatomer subunit beta	Copb2	1	29	1	36.8	102.45	905	7.90E-138	NaN	NaN	NaN	0	NaN	NaN	NaN	0	NaN	NaN	NaN	0
O55103	O55103	Periaxin	Prx	1	2	2	2	147.69	1391	1.25E-05	NaN	NaN	NaN	0	NaN	NaN	NaN	0	NaN	NaN	NaN	0
O55131;Q16181	O55131;Q16181	Septin-7	Sept7;SEPT7	2	14	13	41.3	50549	436	2.86E-98	15611	16602	33823	29	12196	15642	44749	29	0.88258	0.95027	31999	29
P18077;O55142	P18077;O55142	60S ribosomal protein L35a	RPL35A;Rpl35a	2	8	8	45.5	12538	110	6.24E-21	0.42714	0.5896	18293	18	0.40801	0.56393	39545	18	10665	10034	35874	18
O55143	O55143	Sarcoplasmic/endoplasmic reticulum calcium ATPase 2	Atp2a2	1	30	2	36.2	114.86	1044	3.21E-177	NaN	NaN	NaN	0	NaN	NaN	NaN	0	NaN	NaN	NaN	0
O60216;Q61550;Q9H4I0;A2AU37	O60216;Q61550	Double-strand-break repair protein rad21 homolog	RAD21;Rad21	4	16	16	28.2	71689	631	1.04E-75	0.49491	0.71181	24592	15	0.48683	0.58585	40655	15	0.88367	0.87899	27062	15
O60220;Q9WVA2;Q4FZG7	O60220;Q9WVA2	Mitochondrial import inner membrane translocase subunit Tim8 A	TIMM8A;Timm8a1	3	6	6	85.6	10998	97	2.44E-27	0.52893	0.87286	35724	5	0.47942	0.78517	40328	5	0.82564	0.95563	32397	5
O60231	O60231	Putative pre-mRNA-splicing factor ATP-dependent RNA helicase DHX16	DHX16	1	20	19	25.4	119.26	1041	3.49E-85	0.59307	0.6794	28763	18	0.59331	0.65789	49167	18	0.83846	0.8548	44328	18
O60232;P56873	O60232	Sjoegren syndrome/scleroderma autoantigen 1	SSSCA1	2	4	4	44.7	21474	199	4.92E-36	NaN	NaN	NaN	1	NaN	NaN	NaN	1	NaN	NaN	NaN	1
O60237	O60237	Protein phosphatase 1 regulatory subunit 12B	PPP1R12B	1	1	1	2.2	110.4	982	1.40E-09	NaN	NaN	NaN	0	NaN	NaN	NaN	0	NaN	NaN	NaN	0
Q9Z2F7;O60238	Q9Z2F7;O60238	BCL2/adenovirus E1B 19 kDa protein-interacting protein 3-like	Bnip3l;BNIP3L	2	2	2	13.8	23766	218	4.65E-05	17596	26034	53086	2	13962	19452	35227	2	0.83862	0.84126	20382	2
Q8R574;O60256	Q8R574;O60256	Phosphoribosyl pyrophosphate synthase-associated protein 2	Prpsap2;PRPSAP2	2	6	5	22.8	40.88	369	5.46E-17	13792	18664	27225	4	12444	1733	28089	4	0.8973	0.92193	88319	4
Q61016;O60262	Q61016;O60262	Guanine nucleotide-binding protein G(I)/G(S)/G(O) subunit gamma-7	Gng7;GNG7	2	1	1	23.5	74796	68	0.001271	NaN	NaN	NaN	0	NaN	NaN	NaN	0	NaN	NaN	NaN	0
O60264;Q91ZW3	O60264;Q91ZW3	SWI/SNF-related matrix-associated actin-dependent regulator of chromatin subfamily A member 5	SMARCA5;Smarca5	2	38	27	37.1	121.9	1052	2.23E-196	0.47166	0.76052	45626	57	0.54746	0.85074	52063	58	10665	11343	29127	58
O60271;Q9UPT6;Q9ESN9	O60271	C-Jun-amino-terminal kinase-interacting protein 4	SPAG9	3	24	9	26.1	146.2	1321	1.09E-122	13887	16921	29553	27	1119	14658	30871	27	0.87801	0.94778	41158	27
O60287;Q571H0	O60287	Nucleolar pre-ribosomal-associated protein 1	URB1	2	14	14	8.3	254.39	2271	5.93E-48	0.53181	0.63086	49194	10	0.44796	0.49151	43492	10	10062	10278	16934	10
O60293	O60293	Zinc finger C3H1 domain-containing protein	ZFC3H1	1	2	2	1	226.35	1989	1.79E-05	NaN	NaN	NaN	1	NaN	NaN	NaN	1	NaN	NaN	NaN	1
O60296	O60296	Trafficking kinesin-binding protein 2	TRAK2	1	3	3	5.3	101.42	914	1.30E-07	NaN	NaN	NaN	1	NaN	NaN	NaN	1	NaN	NaN	NaN	1
O60306;Q8CFQ3	O60306;Q8CFQ3	Intron-binding protein aquarius	AQR;Aqr	2	13	13	11.8	171.29	1485	9.52E-33	0.58534	0.65776	30604	14	0.48345	0.72381	28421	14	0.88266	0.9513	15737	14
O60313;P58281;P58682	O60313;P58281	Dynamin-like 120 kDa protein, mitochondrial;Dynamin-like 120 kDa protein, form S1	OPA1;Opa1	3	37	37	41.9	111.63	960	3.04E-166	0.63969	0.85118	46019	37	0.54779	0.72246	41646	37	0.866	0.90156	47339	37
O60315;Q9R0G7	O60315;Q9R0G7	Zinc finger E-box-binding homeobox 2	ZEB2;Zeb2	2	8	8	9.7	136.45	1214	1.17E-28	0.27738	0.38481	91113	2	0.17131	0.24583	71.86	2	0.68751	0.77108	33229	2
O60318	O60318	80 kDa MCM3-associated protein	MCM3AP	1	6	3	5.4	218.4	1980	5.99E-34	0.58029	0.63604	35243	4	0.48064	0.71382	25.46	3	0.84278	0.94289	11496	4
O60333;Q60575	O60333;Q60575	Kinesin-like protein KIF1B	KIF1B;Kif1b	2	9	4	7.8	204.47	1816	1.23E-30	19891	18291	52142	5	1895	24919	54502	4	11069	10921	16.78	5
O60341;Q6ZQ88	O60341;Q6ZQ88	Lysine-specific histone demethylase 1A	KDM1A;Kdm1a	2	8	8	10.7	92902	852	4.00E-25	0.71226	0.58833	21879	10	0.71325	0.62058	37319	10	10546	10995	41298	10
O60343;Q8BYJ6	O60343	TBC1 domain family member 4	TBC1D4	2	13	13	13.6	146.56	1298	8.88E-40	22906	20537	39677	14	19102	18914	55673	13	0.87355	10112	33.96	14
O60361	O60361	Putative nucleoside diphosphate kinase	NME2P1	1	9	1	66.4	15529	137	3.53E-82	NaN	NaN	NaN	1	NaN	NaN	NaN	1	NaN	NaN	NaN	1
O60427	O60427	Fatty acid desaturase 1	FADS1	1	2	2	5.6	51964	444	2.12E-06	NaN	NaN	NaN	1	NaN	NaN	NaN	1	NaN	NaN	NaN	1
O60443;Q9Z2D3	O60443	Non-syndromic hearing impairment protein 5	DFNA5	2	11	11	31	54554	496	4.58E-98	2915	27501	28587	14	26277	27696	73039	14	0.86889	0.9829	45858	14
O60462;O35375	O60462;O35375	Neuropilin-2	NRP2;Nrp2	2	10	10	16.2	104.86	931	4.23E-39	0.64345	0.58111	16724	6	0.78909	0.7343	25.31	6	11448	11851	12597	6
O60476;P39098	O60476;P39098	Mannosyl-oligosaccharide 1,2-alpha-mannosidase IB	MAN1A2;Man1a2	2	2	2	4.5	73003	641	5.54E-06	NaN	NaN	NaN	1	NaN	NaN	NaN	1	NaN	NaN	NaN	1
O60486;Q9QZC2	O60486;Q9QZC2	Plexin-C1	PLXNC1;Plxnc1	2	16	15	11.7	175.74	1568	1.96E-36	0.66776	0.92017	33911	6	0.76761	0.86338	57208	6	11555	13289	55192	6
O60488;Q9QUJ7	O60488;Q9QUJ7	Long-chain-fatty-acid--CoA ligase 4	ACSL4;Acsl4	2	28	26	46.4	79187	711	2.77E-128	0.45449	0.42794	38321	22	0.34604	0.4438	44397	22	0.92109	1006	29278	22
O60493;O70492	O60493;O70492	Sorting nexin-3	SNX3;Snx3	2	13	11	81.5	18762	162	1.37E-62	12054	13771	20229	19	11285	13089	42611	19	0.85443	0.94314	42.44	19
O60499	O60499	Syntaxin-10	STX10	1	2	2	14.5	28114	249	5.43E-21	NaN	NaN	NaN	1	NaN	NaN	NaN	1	NaN	NaN	NaN	1
O60502;Q9EQQ9	O60502;Q9EQQ9	Bifunctional protein NCOAT;Protein O-GlcNAcase;Histone acetyltransferase	MGEA5;Mgea5	2	17	17	24.6	102.91	916	5.71E-45	20046	22416	42592	13	16013	19703	58.17	13	0.91204	0.97899	35016	13
O60504;Q9R1Z8	O60504	Vinexin	SORBS3	2	3	3	8	75.34	671	8.54E-22	21787	31938	50278	3	11624	22134	17612	3	11076	11233	23332	3
O60506;Q7TMK9	O60506;Q7TMK9	Heterogeneous nuclear ribonucleoprotein Q	SYNCRIP;Syncrip	2	29	21	53.8	69602	623	3.43E-191	0.63253	0.73256	27054	74	0.54962	0.62259	34689	74	0.82949	0.90516	32044	74
O60508;Q9DC48	O60508;Q9DC48	Pre-mRNA-processing factor 17	CDC40;Cdc40	2	9	9	22.5	65521	579	2.62E-21	0.43951	0.61142	24537	6	0.43902	0.67511	37043	6	0.92358	0.95085	30415	6
O60513	O60513	Beta-1,4-galactosyltransferase 4;N-acetyllactosamine synthase;Lactotriaosylceramide beta-1,4-galactosyltransferase	B4GALT4	1	1	1	5.2	40041	344	0.0011314	NaN	NaN	NaN	1	NaN	NaN	NaN	1	NaN	NaN	NaN	1
O60518;Q8BIV3	O60518;Q8BIV3	Ran-binding protein 6	RANBP6;Ranbp6	2	9	8	10.3	124.71	1105	5.53E-19	0.56056	0.85541	39893	5	0.51831	0.69452	28346	5	0.80325	0.94093	23.8	5
O60524;Q8CCP0	O60524;Q8CCP0	Nuclear export mediator factor NEMF;Nuclear export mediator factor Nemf	NEMF;Nemf	2	4	4	5.5	122.95	1076	5.98E-12	1107	17046	89347	2	0.87032	1336	15.3	2	0.80885	0.79971	88485	2
O60547	O60547	GDP-mannose 4,6 dehydratase	GMDS	1	3	1	11.6	41949	372	4.01E-06	20354	16078	53749	3	1264	11512	78061	3	0.92996	0.97272	21052	3
O60563;Q9QWV9	O60563;Q9QWV9	Cyclin-T1	CCNT1;Ccnt1	2	4	4	8.3	80684	726	2.08E-25	0.27485	0.39409	39305	4	0.3006	0.47427	36927	4	10721	11117	71842	4
O60566	O60566	Mitotic checkpoint serine/threonine-protein kinase BUB1 beta	BUB1B	1	3	3	3.9	119.54	1050	3.10E-06	10368	0.94121	24885	2	0.94801	10596	90848	2	0.89456	10368	57938	2
O60568	O60568	Procollagen-lysine,2-oxoglutarate 5-dioxygenase 3	PLOD3	1	24	14	35	84784	738	1.22E-105	0.36808	0.50359	46784	15	0.41613	0.49428	52648	15	11666	13046	33338	15
Q8BMB3;O60573	Q8BMB3;O60573	Eukaryotic translation initiation factor 4E type 2	Eif4e2;EIF4E2	2	4	4	22	28263	245	7.36E-10	0.66823	0.90518	48.58	3	0.64727	11128	46622	3	0.89861	0.8434	29593	3
O60610	O60610	Protein diaphanous homolog 1	DIAPH1	1	17	11	14.9	141.35	1272	7.03E-54	0.68229	13047	54683	10	0.65133	1174	62205	10	10062	0.91839	25.08	10
Q9ERR7;O60613	Q9ERR7;O60613	15 kDa selenoprotein	Sep15;SEP15	2	4	4	32.7	17824	162	2.54E-26	20892	26285	22765	6	24297	3289	32208	6	11307	13593	24298	6
Q9QY33;O60637	Q9QY33;O60637	Tetraspanin-3	Tspan3;TSPAN3	2	2	2	9.1	28048	253	3.03E-07	0.25378	0.27194	22868	2	0.27429	0.33006	10976	2	1064	12088	12642	2
O60645;Q6KAR6	O60645;Q6KAR6	Exocyst complex component 3	EXOC3;Exoc3	2	11	11	20	86844	756	5.01E-32	10051	16188	44099	7	0.73753	13278	20618	7	0.92376	10542	25577	7
O60664	O60664	Perilipin-3	PLIN3	1	12	11	38.7	47074	434	3.25E-98	1058	10807	24693	18	0.89339	10245	25143	18	0.96881	0.95471	23217	18
O60669	O60669	Monocarboxylate transporter 2	SLC16A7	1	2	2	3.1	52.2	478	1.64E-09	NaN	NaN	NaN	0	NaN	NaN	NaN	0	NaN	NaN	NaN	0
O60671;Q9QWZ1	O60671	Cell cycle checkpoint protein RAD1	RAD1	2	3	3	16.7	31827	282	8.75E-08	0.648	0.90847	48257	2	0.62579	0.81893	38849	2	0.94493	0.93833	81287	2
O60678;Q922H1	O60678;Q922H1	Protein arginine N-methyltransferase 3	PRMT3;Prmt3	2	4	4	8.3	59875	531	2.15E-18	0.87351	14791	69544	5	12811	12011	34286	5	0.94271	10942	80509	5
O60684;O35345;O15131	O60684;O35345;O15131	Importin subunit alpha-7;Importin subunit alpha-6	KPNA6;Kpna6;KPNA5	3	11	6	24.6	60029	536	1.11E-47	11861	10846	23488	13	0.91302	0.94196	74744	13	0.82504	0.9429	60076	13
O60701	O60701	UDP-glucose 6-dehydrogenase	UGDH	1	22	8	58.3	55023	494	1.01E-161	16343	29728	26907	24	16911	27094	53708	24	0.86527	0.8877	43715	24
O88856;O60704	O88856;O60704	Protein-tyrosine sulfotransferase 2	Tpst2;TPST2	2	1	1	4.3	42067	376	0.00084298	NaN	NaN	NaN	1	NaN	NaN	NaN	1	NaN	NaN	NaN	1
O60716	O60716	Catenin delta-1	CTNND1	1	29	8	37.5	108.17	968	1.37E-164	0.52713	0.87197	33636	41	0.7503	0.96449	41196	41	10994	11274	26834	41
O60725;Q9EQK7	O60725;Q9EQK7	Protein-S-isoprenylcysteine O-methyltransferase	ICMT;Icmt	2	2	2	9.9	31938	284	3.95E-05	0.44752	0.33401	71073	3	0.67986	0.71459	29.02	3	13666	15552	35194	3
O60749	O60749	Sorting nexin-2	SNX2	1	20	1	40.1	58.47	519	9.19E-84	13485	26056	25478	21	15722	23619	22.87	21	0.92813	0.91805	26059	21
O60762;O70152	O60762	Dolichol-phosphate mannosyltransferase	DPM1	2	8	8	30	29634	260	2.25E-23	0.33713	0.32128	60834	5	0.35398	0.54679	20.55	5	14057	15692	45097	5
O60763;REV__Q5VZ89	O60763	General vesicular transport factor p115	USO1	2	29	16	36.6	107.89	962	1.99E-254	10418	1198	37995	31	0.86717	12098	36031	30	0.90178	1013	30488	31
O60779	O60779	Thiamine transporter 1	SLC19A2	1	3	3	11.7	55399	497	7.85E-13	NaN	NaN	NaN	0	NaN	NaN	NaN	0	NaN	NaN	NaN	0
O60783	O60783	28S ribosomal protein S14, mitochondrial	MRPS14	1	1	1	11.7	15139	128	0.00043865	NaN	NaN	NaN	0	NaN	NaN	NaN	0	NaN	NaN	NaN	0
O60784;O88746	O60784	Target of Myb protein 1	TOM1	2	12	12	28.5	53818	492	1.52E-47	0.95726	1241	21171	14	0.94588	1142	76492	14	0.99592	0.95225	62.06	14
Q99880;Q99879;Q99877;Q93079;Q8CGP2;Q8CGP1;Q6ZWY9;Q64525;Q64478;Q64475;Q5QNW6;P62807;P58876;P57053;P10854;P10853;O60814;Q96A08;P70696	Q99880;Q99879;Q99877;Q93079;Q8CGP2;Q8CGP1;Q6ZWY9;Q64525;Q64478;Q64475;Q5QNW6;P62807;P58876;P57053;P10854;P10853;O60814;Q96A08;P70696	Histone H2B type 1-L;Histone H2B type 1-M;Histone H2B type 1-N;Histone H2B type 1-H;Histone H2B type 1-P;Histone H2B type 1-K;Histone H2B type 1-C/E/G;Histone H2B type 2-B;Histone H2B type 1-B;Histone H2B type 2-F;Histone H2B type 1-C/E/F/G/I;Histone H2B type 1-D;Histone H2B type F-S;Histone H2B type 1-F/J/L;Histone H2B type 1-A	HIST1H2BL;HIST1H2BM;HIST1H2BN;HIST1H2BH;Hist1h2bp;Hist1h2bk;Hist1h2bc;Hist2h2bb;Hist1h2bh;Hist1h2bb;HIST2H2BF;HIST1H2BC;HIST1H2BD;H2BFS;Hist1h2bm;Hist1h2bf;HIST1H2BK;HIST1H2BA;Hist1h2ba	19	6	2	41.3	13952	126	7.73E-46	0.62022	0.75407	40115	104	0.62751	0.78514	57414	104	0.99376	11093	31321	104
O60825;P70265;Q16875	O60825;P70265	6-phosphofructo-2-kinase/fructose-2,6-bisphosphatase 2;6-phosphofructo-2-kinase;Fructose-2,6-bisphosphatase	PFKFB2;Pfkfb2	3	10	9	25	58476	505	2.46E-28	10499	18663	50705	6	13562	24404	99873	6	0.94727	0.93127	42.93	6
O60826;Q9JIG7	O60826	Coiled-coil domain-containing protein 22	CCDC22	2	7	7	13.7	70755	627	3.77E-17	2.11	2159	72417	7	1836	10501	56629	7	0.93203	10444	10818	7
O60828;Q91VJ5	O60828;Q91VJ5	Polyglutamine-binding protein 1	PQBP1;Pqbp1	2	5	5	41.9	30472	265	1.87E-35	0.83058	0.78602	24442	3	0.69789	0.68752	37479	3	0.83063	0.89209	18346	3
Q9JIG8;O60831	Q9JIG8;O60831	PRA1 family protein 2	Praf2;PRAF2	2	1	1	6.2	19478	178	0.0016567	NaN	NaN	NaN	1	NaN	NaN	NaN	1	NaN	NaN	NaN	1
O60832;Q9ESX5	O60832	H/ACA ribonucleoprotein complex subunit 4	DKC1	2	15	15	32.1	57673	514	3.01E-83	0.37181	0.54185	33432	35	0.45798	0.56079	38797	35	0.93977	10195	36008	34
O60841	O60841	Eukaryotic translation initiation factor 5B	EIF5B	1	36	16	33.3	138.83	1220	1.30E-143	0.74377	10175	26835	41	0.76876	10139	41802	41	0.91293	10114	43.35	41
Q9JMG1;O60869	Q9JMG1;O60869	Endothelial differentiation-related factor 1	Edf1;EDF1	2	5	5	36.5	16369	148	2.40E-18	0.84739	0.8676	37102	7	0.61363	0.80056	29242	7	0.68842	0.79943	26594	7
O60870;Q8K339	O60870;Q8K339	DNA/RNA-binding protein KIN17	KIN;Kin	2	3	3	10.4	45373	393	1.15E-08	NaN	NaN	NaN	1	NaN	NaN	NaN	1	NaN	NaN	NaN	1
Q9QYJ0;O60884	Q9QYJ0;O60884	DnaJ homolog subfamily A member 2	Dnaja2;DNAJA2	2	13	13	38.8	45745	412	2.11E-65	0.69516	13454	16407	9	0.88198	15287	26242	9	11666	10956	18188	9
O60885;Q9ESU6;Q91Y44	O60885;Q9ESU6	Bromodomain-containing protein 4	BRD4;Brd4	3	14	9	13.6	152.22	1362	3.54E-64	0.41661	0.70678	32.86	12	0.47766	0.79124	38369	12	0.8702	0.98625	17714	12
O60888	O60888	Protein CutA	CUTA	1	1	1	7.8	19116	179	5.57E-07	NaN	NaN	NaN	0	NaN	NaN	NaN	0	NaN	NaN	NaN	0
O60911	O60911	Cathepsin L2	CTSL2	1	5	4	15.9	37329	334	8.10E-18	0.38653	0.36556	157.33	3	0.42882	0.50326	159.05	3	0.9169	10618	98153	3
O60921	O60921	Checkpoint protein HUS1	HUS1	1	2	2	10	31691	280	1.62E-05	10434	0.82177	30097	3	13621	10839	36292	3	10972	11675	19867	3
O60925;Q9CWM4	O60925;Q9CWM4	Prefoldin subunit 1	PFDN1;Pfdn1	2	5	5	40.2	14.21	122	3.93E-16	11863	15365	18643	4	0.95023	12515	28.75	4	0.80146	0.89928	11.68	4
O60927	O60927	Protein phosphatase 1 regulatory subunit 11	PPP1R11	1	2	2	21.4	13952	126	0.00024316	NaN	NaN	NaN	1	NaN	NaN	NaN	1	NaN	NaN	NaN	1
O60934	O60934	Nibrin	NBN	1	5	5	13.9	84958	754	5.97E-38	0.4713	0.95171	89642	5	0.63862	0.98965	13.71	5	13539	10682	15549	5
O60942;O55236	O60942;O55236	mRNA-capping enzyme;Polynucleotide 5-triphosphatase;mRNA guanylyltransferase	RNGTT;Rngtt	2	3	3	5.2	68556	597	7.06E-08	NaN	NaN	NaN	1	NaN	NaN	NaN	1	NaN	NaN	NaN	1
O70133	O70133	ATP-dependent RNA helicase A	Dhx9	1	25	3	20.6	149.47	1380	2.27E-163	NaN	NaN	NaN	0	NaN	NaN	NaN	0	NaN	NaN	NaN	0
O70138	O70138	Neutrophil collagenase	Mmp8	1	1	1	2.2	53125	465	0.0011546	NaN	NaN	NaN	0	NaN	NaN	NaN	0	NaN	NaN	NaN	0
O70145	O70145	Neutrophil cytosol factor 2	Ncf2	1	3	3	7.2	59485	525	2.75E-09	NaN	NaN	NaN	0	NaN	NaN	NaN	0	NaN	NaN	NaN	0
O70172	O70172	Phosphatidylinositol 5-phosphate 4-kinase type-2 alpha	Pip4k2a	1	10	1	28.6	46151	405	1.80E-34	13849	14201	18412	13	10593	13575	25.43	13	10272	10099	10307	13
O70200	O70200	Allograft inflammatory factor 1	Aif1	1	1	1	8.2	16.91	147	0.0017441	NaN	NaN	NaN	0	NaN	NaN	NaN	0	NaN	NaN	NaN	0
O70209	O70209	PDZ and LIM domain protein 3	Pdlim3	1	9	6	43.4	34299	316	1.94E-82	12473	24526	96251	2	14403	21476	37367	2	12094	10383	14105	2
O70250	O70250	Phosphoglycerate mutase 2	Pgam2	1	6	3	27.3	28827	253	7.61E-29	NaN	NaN	NaN	0	NaN	NaN	NaN	0	NaN	NaN	NaN	0
O70251	O70251	Elongation factor 1-beta	Eef1b	1	9	2	33.3	24693	225	6.42E-55	NaN	NaN	NaN	0	NaN	NaN	NaN	0	NaN	NaN	NaN	0
O70252	O70252	Heme oxygenase 2	Hmox2	1	3	2	14.3	35738	315	6.74E-08	NaN	NaN	NaN	0	NaN	NaN	NaN	0	NaN	NaN	NaN	0
O70258;O43556	O70258;O43556	Epsilon-sarcoglycan	Sgce;SGCE	2	2	2	8.2	49735	437	6.70E-05	NaN	NaN	NaN	1	NaN	NaN	NaN	1	NaN	NaN	NaN	1
P43250;O70293	P43250;O70293	G protein-coupled receptor kinase 6	GRK6;Grk6	2	2	2	4.3	65.99	576	4.89E-05	0.57946	0.80159	25157	2	0.38881	0.55833	84442	2	0.64877	0.66408	62486	2
O70305	O70305	Ataxin-2	Atxn2	1	7	1	6.8	136.48	1285	8.78E-23	NaN	NaN	NaN	1	NaN	NaN	NaN	1	NaN	NaN	NaN	1
O70318	O70318	Band 4.1-like protein 2	Epb41l2	1	22	8	30.4	109.94	988	9.40E-109	10365	0.80887	21386	3	0.63337	0.57968	41601	3	0.64764	0.72954	12025	3
O70325;Q91XR9	O70325;Q91XR9	Phospholipid hydroperoxide glutathione peroxidase, mitochondrial;Phospholipid hydroperoxide glutathione peroxidase, nuclear	Gpx4	2	4	4	24.4	22246	197	8.24E-09	NaN	NaN	NaN	0	NaN	NaN	NaN	0	NaN	NaN	NaN	0
O70362	O70362	Phosphatidylinositol-glycan-specific phospholipase D	Gpld1	1	6	6	10.6	93254	837	8.06E-15	NaN	NaN	NaN	0	NaN	NaN	NaN	0	NaN	NaN	NaN	0
O70370	O70370	Cathepsin S	Ctss	1	6	6	28.8	38474	340	2.85E-47	NaN	NaN	NaN	0	NaN	NaN	NaN	0	NaN	NaN	NaN	0
O70400	O70400	PDZ and LIM domain protein 1	Pdlim1	1	5	2	22.3	35774	327	1.99E-21	NaN	NaN	NaN	0	NaN	NaN	NaN	0	NaN	NaN	NaN	0
Q92759;O70422	Q92759;O70422	General transcription factor IIH subunit 4	GTF2H4;Gtf2h4	2	5	5	11.9	52186	462	6.38E-12	0.9037	0.7994	22408	3	0.87128	0.70987	15.15	3	11327	11875	15889	3
O70423;Q812C9	O70423	Membrane primary amine oxidase	Aoc3	2	7	7	15	84533	765	3.54E-21	NaN	NaN	NaN	0	NaN	NaN	NaN	0	NaN	NaN	NaN	0
P31947;O70456	P31947;O70456	14-3-3 protein sigma	SFN;Sfn	2	4	1	13.3	27774	248	2.90E-14	19152	22076	24754	9	18087	21247	14238	9	0.85374	10313	26844	9
O70475	O70475	UDP-glucose 6-dehydrogenase	Ugdh	1	16	2	42.8	54831	493	5.91E-114	NaN	NaN	NaN	0	NaN	NaN	NaN	0	NaN	NaN	NaN	0
O70493;Q9UMY4	O70493;Q9UMY4	Sorting nexin-12	Snx12;SNX12	2	8	6	39.4	19116	165	2.77E-20	0.78664	1702	31.64	9	0.85382	16674	28809	9	0.97784	0.94962	18458	9
Q02447;O70494	Q02447;O70494	Transcription factor Sp3	SP3;Sp3	2	2	2	5.4	81924	781	1.37E-37	NaN	NaN	NaN	1	NaN	NaN	NaN	1	NaN	NaN	NaN	1
O70566	O70566	Protein diaphanous homolog 2	Diaph2	1	2	2	2.7	124.87	1098	5.37E-05	NaN	NaN	NaN	0	NaN	NaN	NaN	0	NaN	NaN	NaN	0
O75027;Q61102	O75027;Q61102	ATP-binding cassette sub-family B member 7, mitochondrial	ABCB7;Abcb7	2	2	2	3.3	82.64	752	7.62E-05	NaN	NaN	NaN	1	NaN	NaN	NaN	1	NaN	NaN	NaN	1
Q08874;O75030	Q08874;O75030	Microphthalmia-associated transcription factor	Mitf;MITF	2	3	2	8.2	58627	526	3.69E-08	0.88979	0.96542	19335	5	0.75658	0.84476	27651	5	0.96589	0.99609	78858	5
O75044;Q91Z67;P0DJJ0	O75044;Q91Z67	SLIT-ROBO Rho GTPase-activating protein 2	SRGAP2;Srgap2	3	12	10	19	120.88	1071	1.23E-29	1225	14489	26048	5	13651	14475	56273	6	0.94714	0.9367	39.3	7
O75054;Q6ZQA6	O75054	Immunoglobulin superfamily member 3	IGSF3	2	18	18	21.9	135.19	1194	6.07E-76	0.47723	0.5462	13.43	11	0.39027	0.51394	22807	11	0.97157	0.95748	29177	11
O75056;Q64519	O75056;Q64519	Syndecan-3	SDC3;Sdc3	2	2	2	9.5	45496	442	2.51E-10	NaN	NaN	NaN	0	NaN	NaN	NaN	0	NaN	NaN	NaN	0
O75083	O75083	WD repeat-containing protein 1	WDR1	1	24	11	47.4	66193	606	2.52E-166	10051	1842	41519	32	11175	17797	49249	32	0.87474	0.93052	28635	32
O75096;Q8VI56	O75096;Q8VI56	Low-density lipoprotein receptor-related protein 4	LRP4;Lrp4	2	3	3	2.3	212.04	1905	4.41E-07	NaN	NaN	NaN	1	NaN	NaN	NaN	1	NaN	NaN	NaN	1
O75116;P70336	O75116;P70336	Rho-associated protein kinase 2	ROCK2;Rock2	2	19	15	17.9	160.9	1388	6.67E-71	12427	12598	32683	13	0.70507	0.9485	34229	13	0.82957	0.92126	29616	13
O75122;Q8BRT1	O75122;Q8BRT1	CLIP-associating protein 2	CLASP2;Clasp2	2	10	8	12.9	141.13	1294	7.55E-38	0.81988	15193	21441	5	10587	15721	18.62	5	1263	12778	25047	5
O75127	O75127	Pentatricopeptide repeat-containing protein 1, mitochondrial	PTCD1	1	3	3	5.4	78855	700	4.32E-06	NaN	NaN	NaN	1	NaN	NaN	NaN	1	NaN	NaN	NaN	1
O75131;Q9Z140;Q96A23;Q8BLR2;Q0VE82;O95741;Q9UBL6	O75131	Copine-3	CPNE3	7	15	8	35.6	60.13	537	5.51E-76	1668	12074	35653	16	15006	12859	58.82	16	0.9131	0.98705	32116	16
O75143;Q91YI1	O75143	Autophagy-related protein 13	ATG13	2	3	3	8.5	56571	517	1.63E-07	13008	12756	42797	3	10299	16253	56827	3	13275	11463	31545	3
O75146;Q9JKY5	O75146	Huntingtin-interacting protein 1-related protein	HIP1R	2	7	7	8.4	119.39	1068	6.43E-33	0.3086	0.60441	24852	2	0.46305	0.82522	51565	2	13387	1169	15206	2
O75150;Q3U319	O75150;Q3U319	E3 ubiquitin-protein ligase BRE1B	RNF40;Rnf40	2	11	11	13.6	113.65	1001	6.25E-45	0.71391	0.68537	19.93	9	0.56904	0.81812	23686	9	0.8248	0.90641	22512	9
O75152;Q6NZF1	O75152	Zinc finger CCCH domain-containing protein 11A	ZC3H11A	2	23	23	36.3	89.13	810	2.43E-97	0.51846	0.7024	48886	24	0.6126	10494	57926	24	10234	11086	33882	24
O75153;Q5SW19;Q9Y5I4	O75153;Q5SW19	Clustered mitochondria protein homolog	CLUH;Cluh	3	21	21	22	146.67	1309	5.22E-112	0.98138	10386	20093	31	0.8441	11304	24703	31	10418	11188	23565	31
O75157	O75157	TSC22 domain family protein 2	TSC22D2	1	2	1	2.4	79227	780	0.00012817	NaN	NaN	NaN	1	NaN	NaN	NaN	1	NaN	NaN	NaN	1
O75165	O75165	DnaJ homolog subfamily C member 13	DNAJC13	1	42	42	23.1	254.41	2243	1.65E-141	0.80712	10006	27168	31	0.83102	11093	48381	31	0.94889	10564	48045	31
O75167	O75167	Phosphatase and actin regulator 2	PHACTR2	1	1	1	3.2	69699	634	0.0012899	NaN	NaN	NaN	1	NaN	NaN	NaN	1	NaN	NaN	NaN	1
O75170;Q8R3Q2	O75170;Q8R3Q2	Serine/threonine-protein phosphatase 6 regulatory subunit 2	PPP6R2;Ppp6r2	2	3	3	5.5	104.94	966	6.97E-15	0.47736	0.9409	39242	3	0.62181	1058	42961	3	11654	10703	49173	3
O75175;Q8K0V4	O75175;Q8K0V4	CCR4-NOT transcription complex subunit 3	CNOT3;Cnot3	2	4	4	6.4	81871	753	1.32E-09	0.87187	0.99033	16657	9	0.84726	0.94311	33581	9	0.90225	0.98233	27273	9
O75177;Q8BW22	O75177;Q8BW22	Calcium-responsive transactivator	SS18L1;Ss18l1	2	2	2	5.8	42.99	396	5.01E-08	0.46777	0.97409	13215	2	0.59821	1026	29719	2	13808	12166	0.40423	2
O75179;Q99NH0	O75179;Q99NH0	Ankyrin repeat domain-containing protein 17	ANKRD17;Ankrd17	2	21	14	11.7	274.25	2603	6.17E-61	0.48445	0.97079	35514	13	0.68923	0.99355	36965	13	0.97155	0.9842	31586	13
O75191	O75191	Xylulose kinase	XYLB	1	2	2	6.5	58382	536	6.82E-06	10555	13834	54411	2	12032	16716	33859	2	0.98656	10149	23072	2
O75208	O75208	Ubiquinone biosynthesis protein COQ9, mitochondrial	COQ9	1	5	2	23.3	35509	318	5.99E-25	11959	0.93975	53492	7	0.8864	0.6929	57611	7	0.8271	0.88485	62389	7
O75223;Q9D7X8	O75223	Gamma-glutamylcyclotransferase	GGCT	2	7	7	33.5	21007	188	1.31E-22	0.64849	13558	36194	4	0.81147	14389	23684	4	11072	0.95775	35759	4
O75306;Q91WD5	O75306;Q91WD5	NADH dehydrogenase [ubiquinone] iron-sulfur protein 2, mitochondrial	NDUFS2;Ndufs2	2	8	8	19.7	52545	463	3.41E-28	0.91003	13268	18489	9	0.75025	13064	45752	9	1089	10804	48928	9
O75312;Q62384	O75312	Zinc finger protein ZPR1	ZNF259	2	9	9	29.2	50925	459	9.03E-66	0.81544	13686	14368	5	0.73494	12975	65701	5	0.85393	0.79398	45375	5
O75319	O75319	RNA/RNP complex-1-interacting phosphatase	DUSP11	1	3	3	15.2	38938	330	2.73E-09	0.7557	0.67568	45974	3	0.70949	0.6527	50599	3	10713	1335	18407	3
O75323;O55126	O75323;O55126	Protein NipSnap homolog 2	GBAS;Gbas	2	4	4	17.1	33742	286	1.16E-08	NaN	NaN	NaN	0	NaN	NaN	NaN	0	NaN	NaN	NaN	0
O75340;P12815	O75340;P12815	Programmed cell death protein 6	PDCD6;Pdcd6	2	10	10	69.1	21868	191	1.00E-45	0.80535	0.84401	26585	24	0.86201	0.90291	45912	24	10497	11264	46966	24
O75347	O75347	Tubulin-specific chaperone A	TBCA	1	11	7	55.6	12855	108	1.36E-34	15716	17987	57664	29	14999	16699	49.77	29	0.88883	0.97277	36177	29
O75348	O75348	V-type proton ATPase subunit G 1	ATP6V1G1	1	2	1	16.9	13757	118	6.69E-17	0.80886	12347	32911	2	0.52878	0.72666	95.78	2	0.66654	0.64852	72698	2
O75351	O75351	Vacuolar protein sorting-associated protein 4B	VPS4B	1	11	3	28.8	49301	444	8.50E-29	0.89192	1152	14852	2	11479	1364	10149	2	11473	10919	20134	2
O75352	O75352	Mannose-P-dolichol utilization defect 1 protein	MPDU1	1	2	2	4.5	26638	247	4.11E-05	0.42138	0.39074	69068	5	0.38724	0.63473	83309	5	14307	16528	55959	5
O75362;Q7TSH3;O15090;Q8K083	O75362	Zinc finger protein 217	ZNF217	4	5	4	6.9	115.27	1048	7.49E-12	0.5435	0.59326	38008	8	0.44442	0.47317	47561	8	0.7087	0.82128	30863	8
O75367	O75367	Core histone macro-H2A.1	H2AFY	1	16	3	48.4	39617	372	1.63E-162	0.43476	0.46606	24036	44	0.39444	0.48865	38638	44	0.99562	11142	37957	44
O75368	O75368	SH3 domain-binding glutamic acid-rich-like protein	SH3BGRL	1	8	3	79.8	12774	114	1.90E-38	36626	28281	46734	11	28885	30439	30722	11	0.73718	0.78864	19.48	11
O75369	O75369	Filamin-B	FLNB	1	69	23	37.4	278.16	2602	0	15586	18946	50368	59	12562	15385	35138	59	0.86988	0.97857	51.67	59
O75376;Q60974	O75376;Q60974	Nuclear receptor corepressor 1	NCOR1;Ncor1	2	11	10	7.7	270.21	2440	1.91E-52	0.61534	0.85566	44469	5	0.62924	0.76219	10141	5	0.92031	0.91692	22283	4
O75380	O75380	NADH dehydrogenase [ubiquinone] iron-sulfur protein 6, mitochondrial	NDUFS6	1	3	2	27.4	13711	124	2.34E-13	0.84728	0.95165	39837	3	0.80208	0.98301	21696	3	11902	12205	14426	3
O75381;Q9R0A0	O75381;Q9R0A0	Peroxisomal membrane protein PEX14	PEX14;Pex14	2	4	4	12.2	41236	377	8.77E-16	0.67681	0.92823	38521	2	0.75214	10251	45264	2	12208	12482	11.25	2
O75382;Q9R1R2	O75382;Q9R1R2	Tripartite motif-containing protein 3	TRIM3;Trim3	2	3	3	7.1	80829	744	1.24E-14	NaN	NaN	NaN	1	NaN	NaN	NaN	1	NaN	NaN	NaN	1
O75386	O75386	Tubby-related protein 3	TULP3	1	3	3	10.2	49642	442	9.31E-07	12393	10787	18873	3	12373	12525	50326	3	15206	13942	22917	3
O75390	O75390	Citrate synthase, mitochondrial	CS	1	14	7	27.9	51712	466	2.51E-67	0.72362	0.72735	40043	45	0.70854	0.73966	40741	45	1.03	11045	31648	45
O75391;Q7TNE3	O75391	Sperm-associated antigen 7	SPAG7	2	3	3	25.6	26034	227	1.36E-19	0.48046	0.97781	55514	3	0.60176	10781	31854	3	13666	12237	22336	3
O75400;Q9R1C7;Q80W14;Q6NWY9	O75400;Q9R1C7	Pre-mRNA-processing factor 40 homolog A	PRPF40A;Prpf40a	4	17	17	22.8	108.8	957	4.25E-54	0.61525	0.80346	67979	17	0.54622	0.77111	74366	17	0.88547	10644	25486	17
O75410;Q6Y685	O75410	Transforming acidic coiled-coil-containing protein 1	TACC1	2	12	11	18	87793	805	2.88E-56	0.67313	0.78409	31869	8	0.63677	0.81834	22562	8	10662	10728	25597	8
O75419;Q9Z1X9	O75419	Cell division control protein 45 homolog	CDC45	2	6	6	12.7	65568	566	1.73E-15	0.33054	0.65736	22196	6	0.4391	0.73941	35.68	6	1031	11371	25659	6
O75431;O88441	O75431;O88441	Metaxin-2	MTX2;Mtx2	2	7	7	34.2	29763	263	1.48E-55	0.79351	0.77052	13428	12	0.92929	11085	41574	12	11459	11812	27765	12
P40336;O75436	P40336;O75436	Vacuolar protein sorting-associated protein 26A	Vps26a;VPS26A	2	13	13	43.7	38113	327	1.12E-86	2027	14128	36339	17	17377	14783	30942	17	0.85747	0.94635	17859	17
O75438	O75438	NADH dehydrogenase [ubiquinone] 1 beta subcomplex subunit 1	NDUFB1	1	4	4	36.2	69611	58	6.25E-11	0.43754	0.71135	10.18	5	0.5348	0.92267	15415	5	12877	11632	14694	5
O75439;Q9CXT8	O75439	Mitochondrial-processing peptidase subunit beta	PMPCB	2	17	16	41.1	54366	489	2.41E-95	0.69115	0.7899	15711	17	0.6426	0.84302	35171	17	1025	11034	31035	17
O75448;Q99K74	O75448;Q99K74	Mediator of RNA polymerase II transcription subunit 24	MED24;Med24	2	4	4	5.6	110.3	989	1.09E-10	NaN	NaN	NaN	0	NaN	NaN	NaN	0	NaN	NaN	NaN	0
O75449;Q9WV86	O75449;Q9WV86	Katanin p60 ATPase-containing subunit A1	KATNA1;Katna1	2	2	2	5.9	55964	491	0.00014952	0.68792	0.86547	17285	3	0.70272	0.9564	11454	3	10842	11925	0.20639	3
O75475;Q99JF8	O75475;Q99JF8	PC4 and SFRS1-interacting protein	PSIP1;Psip1	2	14	13	34.7	60103	530	2.81E-71	0.88146	11762	29.06	22	0.87351	13589	40999	22	10559	10759	19.01	22
O75477;Q91X78	O75477;Q91X78	Erlin-1	ERLIN1;Erlin1	2	7	6	26.6	38925	346	4.88E-43	0.5553	11004	40445	7	0.60378	0.88222	33562	7	10085	10279	51284	6
Q8CHV6;O75478	Q8CHV6;O75478	Transcriptional adapter 2-alpha	Tada2a;TADA2A	2	1	1	3.6	51338	443	4.14E-06	NaN	NaN	NaN	1	NaN	NaN	NaN	1	NaN	NaN	NaN	1
O75487;P51655	O75487;P51655	Glypican-4;Secreted glypican-4	GPC4;Gpc4	2	4	4	7.9	62411	556	4.26E-09	NaN	NaN	NaN	0	NaN	NaN	NaN	0	NaN	NaN	NaN	0
O75489;Q9DCT2	O75489	NADH dehydrogenase [ubiquinone] iron-sulfur protein 3, mitochondrial	NDUFS3	2	13	13	48.1	30241	264	3.84E-94	10755	1123	42696	21	12287	1538	68.89	21	11908	13112	36995	21
Q9R0U0;O75494;Q8WXF0	Q9R0U0;O75494	Serine/arginine-rich splicing factor 10	Srsf10;SRSF10	3	5	5	22.1	31.3	262	9.70E-32	0.60378	0.5757	40245	11	0.68707	0.58973	44162	11	0.9327	0.94755	28264	11
O75496;O88513	O75496;O88513	Geminin	GMNN;Gmnn	2	2	2	15.3	23565	209	0.00011749	NaN	NaN	NaN	1	NaN	NaN	NaN	1	NaN	NaN	NaN	1
O75506	O75506	Heat shock factor-binding protein 1	HSBP1	1	4	4	72.4	85435	76	5.67E-68	10868	16045	12515	2	0.85757	12297	51016	2	0.80708	0.7936	66.39	2
O75521	O75521	Enoyl-CoA delta isomerase 2, mitochondrial	ECI2	1	8	6	33.2	43585	394	1.84E-55	11727	10503	23381	12	12228	12502	26506	12	0.99137	10578	15023	12
Q921E6;O75530	Q921E6;O75530	Polycomb protein EED	Eed;EED	2	6	6	15.6	50197	441	4.38E-14	0.41058	0.56689	35136	4	0.43023	0.69654	24333	4	11827	11084	18688	4
O75531	O75531	Barrier-to-autointegration factor	BANF1	1	6	1	60.7	10058	89	1.84E-18	22016	19667	52.22	13	14822	16137	84639	13	0.68436	0.78198	48542	13
Q99NB9;O75533	Q99NB9;O75533	Splicing factor 3B subunit 1	Sf3b1;SF3B1	2	43	43	44.1	145.81	1304	3.60E-274	0.53036	0.58069	32318	69	0.53209	0.5845	35505	70	0.9452	1011	31042	69
O75534	O75534	Cold shock domain-containing protein E1	CSDE1	1	31	3	41	88884	798	5.62E-156	1031	0.9739	50885	54	0.85301	0.90163	64.28	54	0.89203	0.98019	51963	54
Q3UND0;O75563	Q3UND0;O75563	Src kinase-associated phosphoprotein 2	Skap2;SKAP2	2	1	1	3.1	40712	358	0.00046017	NaN	NaN	NaN	0	NaN	NaN	NaN	0	NaN	NaN	NaN	0
O75569;Q9WTX2	O75569;Q9WTX2	Interferon-inducible double stranded RNA-dependent protein kinase activator A	PRKRA;Prkra	2	3	3	11.8	34404	313	9.60E-09	17579	14562	19156	2	19864	16459	89587	2	10787	11471	16802	2
O88572;O75581	O88572;O75581	Low-density lipoprotein receptor-related protein 6	Lrp6;LRP6	2	3	3	3.1	180.25	1613	5.14E-16	NaN	NaN	NaN	0	NaN	NaN	NaN	0	NaN	NaN	NaN	0
O75582;Q8C050	O75582;Q8C050	Ribosomal protein S6 kinase alpha-5	RPS6KA5;Rps6ka5	2	5	5	8.7	89864	802	1.29E-15	16555	16145	41844	3	0.74426	0.94418	37505	3	0.86343	0.99902	41459	3
O75586	O75586	Mediator of RNA polymerase II transcription subunit 6	MED6	1	2	2	10.2	28424	246	4.50E-06	0.3821	0.535	38589	4	0.39664	0.61373	41248	4	12026	11647	27584	4
O75592;Q7TPH6	O75592;Q7TPH6	Probable E3 ubiquitin-protein ligase MYCBP2	MYCBP2;Mycbp2	2	2	2	0.6	510.08	4640	3.14E-05	NaN	NaN	NaN	0	NaN	NaN	NaN	0	NaN	NaN	NaN	0
O75600;O88986	O75600	2-amino-3-ketobutyrate coenzyme A ligase, mitochondrial	GCAT	2	5	5	20.8	45285	419	2.30E-20	0.41343	0.3806	42558	3	0.38742	0.40219	37807	3	0.90066	10053	53341	3
O75607;Q9CPP0	O75607	Nucleoplasmin-3	NPM3	2	4	4	42.7	19343	178	4.77E-29	0.50453	0.49926	194.42	3	0.43122	0.52833	220.92	3	0.97528	11359	37085	3
O75608	O75608	Acyl-protein thioesterase 1	LYPLA1	1	6	3	37.8	24669	230	3.16E-30	10121	15804	30261	8	0.88623	13764	61373	8	0.91346	0.93559	42465	8
O75616	O75616	GTPase Era, mitochondrial	ERAL1	1	2	2	6.4	48349	437	3.93E-08	0.45959	0.65355	54419	2	0.37564	0.52376	14612	2	0.6749	0.66329	68274	2
O75629	O75629	Protein CREG1	CREG1	1	1	1	5.5	24074	220	3.15E-08	0.7607	0.53127	36997	5	0.90242	0.6472	65391	5	10741	12336	19429	5
O75643	O75643	U5 small nuclear ribonucleoprotein 200 kDa helicase	SNRNP200	1	74	74	39.4	244.5	2136	0	0.52928	0.62241	29884	99	0.45272	0.51931	47335	99	0.84583	0.91091	42197	98
O75648;Q9DAT5	O75648;Q9DAT5	Mitochondrial tRNA-specific 2-thiouridylase 1	TRMU;Trmu	2	4	4	13.5	47744	421	1.95E-09	0.44969	0.4223	17491	5	0.47693	0.49823	24637	5	0.95756	10669	20552	5
O75663;Q8BH58	O75663;Q8BH58	TIP41-like protein	TIPRL;Tiprl	2	10	10	41.9	31444	272	1.72E-42	15777	15521	26507	11	11491	13717	27159	11	0.89316	10166	16622	11
O75674;Q923U0	O75674	TOM1-like protein 1	TOM1L1	2	4	4	17.6	52988	476	1.55E-10	0.50824	10564	10321	2	0.40028	0.79494	51.63	2	0.8012	0.72291	48815	2
O75676;Q9Z2B9	O75676;Q9Z2B9	Ribosomal protein S6 kinase alpha-4	RPS6KA4;Rps6ka4	2	2	2	4.5	85605	772	3.05E-06	0.93503	1286	10583	2	0.95922	14893	29812	2	0.94058	0.9243	99306	2
O75683;P70279	O75683	Surfeit locus protein 6	SURF6	2	5	5	14.1	41.45	361	1.15E-11	0.31466	0.57589	51021	3	0.37294	0.75177	67756	3	15494	13938	55091	3
O75688;P36993	O75688;P36993	Protein phosphatase 1B	PPM1B;Ppm1b	2	4	2	10	52642	479	2.31E-11	0.71908	15097	17258	2	0.84969	1471	39012	2	12571	11144	28.96	2
O75691	O75691	Small subunit processome component 20 homolog	UTP20	1	33	17	14.6	318.38	2785	1.25E-132	0.39129	0.55331	91965	15	0.38508	0.41759	56913	15	1062	11046	65316	15
O75694	O75694	Nuclear pore complex protein Nup155	NUP155	1	27	10	25.4	155.2	1391	1.01E-142	0.5325	0.61147	25823	36	0.46607	0.62534	32331	36	0.97466	0.97248	22813	36
O75717	O75717	WD repeat and HMG-box DNA-binding protein 1	WDHD1	1	15	13	20.3	125.97	1129	1.28E-109	0.79336	0.80496	29388	10	0.63498	0.88678	24825	10	0.95649	0.94139	19802	10
O75718;Q9CYD3	O75718	Cartilage-associated protein	CRTAP	2	13	13	36.4	46561	401	7.74E-37	0.59307	0.65759	25.91	17	0.5842	0.60981	37907	17	10943	11707	33561	17
O75746;Q8BH59	O75746;Q8BH59	Calcium-binding mitochondrial carrier protein Aralar1	SLC25A12;Slc25a12	2	12	5	18.7	74761	678	4.04E-30	10189	19911	41316	3	0.46383	0.96354	49.68	3	0.56507	0.50534	32487	3
O75781	O75781	Paralemmin-1	PALM	1	2	2	8.8	42075	387	1.39E-06	0.47124	0.9277	12419	2	0.36111	0.64126	25.3	2	0.83157	0.6964	10976	2
O75792	O75792	Ribonuclease H2 subunit A	RNASEH2A	1	5	5	24.4	33395	299	2.04E-16	19656	17937	37658	9	17046	18784	46.81	9	0.95596	0.97892	10507	9
O75794;Q8CII2	O75794;Q8CII2	Cell division cycle protein 123 homolog	CDC123;Cdc123	2	8	8	22.3	39134	336	4.26E-28	0.50577	1069	15.88	5	0.60301	11159	25001	5	12171	10178	21071	5
O75817	O75817	Ribonuclease P protein subunit p20	POP7	1	2	2	25	15651	140	1.08E-05	NaN	NaN	NaN	0	NaN	NaN	NaN	0	NaN	NaN	NaN	0
O75818	O75818	Ribonuclease P protein subunit p40	RPP40	1	3	3	13.2	41833	363	4.16E-10	0.94318	0.986	19112	4	0.45537	0.41793	54994	3	0.61814	0.73172	58057	4
O75821	O75821	Eukaryotic translation initiation factor 3 subunit G	EIF3G	1	12	3	50	35611	320	1.61E-96	13049	12431	45244	31	10434	11701	61815	31	0.85009	0.92175	44912	31
O75822;Q3UGC7;Q66JS6	O75822;Q3UGC7;Q66JS6	Eukaryotic translation initiation factor 3 subunit J;Eukaryotic translation initiation factor 3 subunit J-A;Eukaryotic translation initiation factor 3 subunit J-B	EIF3J;Eif3j1;Eif3j2	3	12	12	58.9	29062	258	4.68E-75	0.59259	11208	34363	14	0.55626	0.95396	44134	14	0.89474	0.8577	34435	14
O75828	O75828	Carbonyl reductase [NADPH] 3	CBR3	1	10	6	49.5	30.85	277	1.01E-77	37075	34037	62549	4	27206	34589	57265	4	0.75212	0.89526	10119	4
O75832;Q9Z2X2	O75832;Q9Z2X2	26S proteasome non-ATPase regulatory subunit 10	PSMD10;Psmd10	2	7	7	50.9	24428	226	7.86E-49	14848	19791	22683	8	14346	17769	32927	8	0.95274	1038	42717	8
O75843;O88512	O75843;O88512	AP-1 complex subunit gamma-like 2	AP1G2;Ap1g2	2	6	6	10.4	87116	785	5.78E-15	19692	15417	28743	5	13027	11029	49668	5	0.72586	0.86498	36268	5
O75844;Q80W54	O75844;Q80W54	CAAX prenyl protease 1 homolog	ZMPSTE24;Zmpste24	2	10	10	23.8	54812	475	3.36E-43	0.43705	0.87401	52838	10	0.4877	0.82102	48977	10	13342	11561	62853	10
O75874	O75874	Isocitrate dehydrogenase [NADP] cytoplasmic	IDH1	1	23	9	60.9	46659	414	4.39E-220	17051	18919	46.59	94	12062	1745	65447	92	0.8623	0.93773	37621	94
O75880	O75880	Protein SCO1 homolog, mitochondrial	SCO1	1	1	1	5.3	33814	301	0.001033	10525	1463	69226	4	12058	1649	46634	4	12671	12964	29922	4
O75884	O75884	Putative hydrolase RBBP9	RBBP9	1	4	3	34.4	21	186	3.57E-11	49599	4219	48212	5	41087	42464	82845	5	0.85548	0.9187	42428	5
O75886;O88811	O75886;O88811	Signal transducing adapter molecule 2	STAM2;Stam2	2	5	3	11.2	58164	525	3.23E-14	NaN	NaN	NaN	1	NaN	NaN	NaN	1	NaN	NaN	NaN	1
O75909;O88874	O75909;O88874	Cyclin-K	CCNK;Ccnk	2	7	7	20.9	64239	580	5.16E-44	0.60615	0.51519	26075	4	0.43818	0.42778	16987	4	0.7463	0.86919	15401	4
O75915;Q8R5J9	O75915;Q8R5J9	PRA1 family protein 3	ARL6IP5;Arl6ip5	2	4	4	17	21614	188	2.23E-10	0.47791	0.55704	39447	13	0.63748	0.90072	23923	13	12921	14137	17762	13
O75928	O75928	E3 SUMO-protein ligase PIAS2	PIAS2	1	1	1	3.4	68.24	621	0.00047479	NaN	NaN	NaN	0	NaN	NaN	NaN	0	NaN	NaN	NaN	0
Q9D287;O75934	Q9D287;O75934	Pre-mRNA-splicing factor SPF27	Bcas2;BCAS2	2	8	8	44.4	26131	225	6.81E-62	0.68445	0.72219	35567	9	0.6478	0.77188	40194	9	0.9845	10793	31982	9
O75935;Q9Z0Y1	O75935	Dynactin subunit 3	DCTN3	2	6	6	31.7	21119	186	2.30E-20	0.55691	11855	7185	2	0.60928	10688	41878	2	10926	0.8817	0.23815	2
O75937;Q6NZB0	O75937;Q6NZB0	DnaJ homolog subfamily C member 8	DNAJC8;Dnajc8	2	8	8	26.5	29841	253	2.12E-29	12564	10771	39653	16	10719	11156	28987	16	0.86707	10018	14505	16
Q8BGT7;O75940	Q8BGT7;O75940	Survival of motor neuron-related-splicing factor 30	Smndc1;SMNDC1	2	6	6	41.6	26753	238	3.43E-58	0.73352	0.83513	19751	12	0.65153	0.81809	23361	12	0.87902	10028	21186	12
O75947	O75947	ATP synthase subunit d, mitochondrial	ATP5H	1	13	11	77.6	18491	161	1.69E-83	0.72817	11882	34.38	21	0.75756	11666	46075	21	10546	11048	65635	20
Q8BJU2;O75954	Q8BJU2;O75954	Tetraspanin-9	Tspan9;TSPAN9	2	1	1	4.6	26738	239	0.0013949	NaN	NaN	NaN	0	NaN	NaN	NaN	0	NaN	NaN	NaN	0
O75955;O08917	O75955;O08917	Flotillin-1	FLOT1;Flot1	2	8	8	24.6	47355	427	1.30E-25	0.47101	0.98922	61701	4	0.32499	0.55714	39713	4	0.72405	0.62134	62583	4
O75962;Q0KL02	O75962;Q0KL02	Triple functional domain protein	TRIO;Trio	2	20	18	8.4	346.9	3097	5.73E-72	12683	14753	36481	20	0.87023	12915	54688	20	0.83787	0.96068	29289	20
O75964	O75964	ATP synthase subunit g, mitochondrial	ATP5L	1	5	5	52.4	11428	103	8.52E-22	0.72467	0.9001	21.85	11	0.79302	10518	47588	11	1175	12743	45607	11
O75970	O75970	Multiple PDZ domain protein	MPDZ	1	7	7	6.3	221.62	2070	6.79E-25	0.65165	0.65866	19939	5	0.6059	0.65586	17884	5	0.94116	11019	14983	5
O75976;O89001	O75976;O89001	Carboxypeptidase D	CPD;Cpd	2	14	14	14.7	152.93	1380	2.24E-53	0.52557	0.56545	56926	9	0.43551	0.54957	35136	9	0.85619	0.97457	31.34	9
O76003	O76003	Glutaredoxin-3	GLRX3	1	13	6	37.6	37432	335	1.91E-85	14631	15007	149.82	27	0.88715	12439	146.67	27	0.83874	0.88805	33494	27
O76021	O76021	Ribosomal L1 domain-containing protein 1	RSL1D1	1	22	22	43.1	54972	490	4.00E-129	0.25605	0.26041	47639	22	0.21876	0.28937	42422	22	0.87877	1023	29943	22
O76024	O76024	Wolframin	WFS1	1	5	2	7.6	100.29	890	1.60E-14	0.39143	0.73265	76795	3	0.50167	0.91961	47296	3	12475	1147	37467	3
O76031;Q9JHS4	O76031;Q9JHS4	ATP-dependent Clp protease ATP-binding subunit clpX-like, mitochondrial	CLPX;Clpx	2	14	14	29.4	69223	633	2.38E-71	0.48797	0.85699	54298	15	0.58276	0.79013	65735	15	10636	11349	33.9	14
O76054;Q99J08;Q9UDX4	O76054;Q99J08	SEC14-like protein 2	SEC14L2;Sec14l2	3	5	5	20.8	46145	403	1.06E-19	15885	18818	98311	2	0.76693	11114	181.01	2	0.38685	0.43067	104.66	2
O76071;Q99KN2	O76071;Q99KN2	Probable cytosolic iron-sulfur protein assembly protein CIAO1	CIAO1;Ciao1	2	6	6	22.1	37.84	339	1.26E-16	14896	16965	28559	8	14043	16681	29.68	8	0.92945	10196	12363	8
O76074	O76074	cGMP-specific 3,5-cyclic phosphodiesterase	PDE5A	1	3	3	5.6	99984	875	3.29E-08	NaN	NaN	NaN	1	NaN	NaN	NaN	1	NaN	NaN	NaN	1
O76080	O76080	AN1-type zinc finger protein 5	ZFAND5	1	2	2	20.7	23132	213	1.66E-54	NaN	NaN	NaN	1	NaN	NaN	NaN	1	NaN	NaN	NaN	1
O76081	O76081	Regulator of G-protein signaling 20	RGS20	1	1	1	2.3	43691	388	0.00093355	NaN	NaN	NaN	0	NaN	NaN	NaN	0	NaN	NaN	NaN	0
O76094	O76094	Signal recognition particle subunit SRP72	SRP72	1	24	24	48.9	74605	671	9.20E-144	0.86193	0.95454	25691	28	0.68038	0.96644	31645	28	0.91124	10343	21263	28
O88200;Q9Y240	O88200;Q9Y240	C-type lectin domain family 11 member A	Clec11a;CLEC11A	2	3	3	11.9	36451	328	6.08E-08	0.78972	0.92577	24493	2	0.54801	0.55956	83106	2	0.70637	0.69036	106.17	2
O88207	O88207	Collagen alpha-1(V) chain	Col5a1	1	1	1	0.5	183.67	1838	0.00056156	NaN	NaN	NaN	0	NaN	NaN	NaN	0	NaN	NaN	NaN	0
O88271	O88271	Craniofacial development protein 1	Cfdp1	1	1	1	5.4	32921	295	0.0010938	NaN	NaN	NaN	0	NaN	NaN	NaN	0	NaN	NaN	NaN	0
O88322;Q14112	O88322	Nidogen-2	Nid2	2	11	10	10.6	153.91	1403	6.62E-56	NaN	NaN	NaN	0	NaN	NaN	NaN	0	NaN	NaN	NaN	0
O88342	O88342	WD repeat-containing protein 1	Wdr1	1	20	7	38.4	66406	606	6.25E-128	NaN	NaN	NaN	0	NaN	NaN	NaN	0	NaN	NaN	NaN	0
O88487	O88487	Cytoplasmic dynein 1 intermediate chain 2	Dync1i2	1	11	1	27.9	68393	612	3.51E-100	NaN	NaN	NaN	0	NaN	NaN	NaN	0	NaN	NaN	NaN	0
O88492	O88492	Perilipin-4	Plin4	1	11	11	29.4	139.41	1403	3.03E-76	NaN	NaN	NaN	1	NaN	NaN	NaN	1	NaN	NaN	NaN	1
Q9UQ13;O88520	Q9UQ13;O88520	Leucine-rich repeat protein SHOC-2	SHOC2;Shoc2	2	1	1	3.4	64887	582	1.04E-20	NaN	NaN	NaN	1	NaN	NaN	NaN	1	NaN	NaN	NaN	1
O88531	O88531	Palmitoyl-protein thioesterase 1	Ppt1	1	7	6	32	34.49	306	2.95E-18	NaN	NaN	NaN	0	NaN	NaN	NaN	0	NaN	NaN	NaN	0
Q9UNS2;O88543	Q9UNS2;O88543	COP9 signalosome complex subunit 3	COPS3;Cops3	2	10	10	30.5	47873	423	1.86E-46	12356	13433	22899	13	10464	15713	23655	13	11008	1145	24.02	13
O88544	O88544	COP9 signalosome complex subunit 4	Cops4	1	18	1	53.7	46284	406	3.76E-49	NaN	NaN	NaN	0	NaN	NaN	NaN	0	NaN	NaN	NaN	0
P22626;O88569	P22626;O88569	Heterogeneous nuclear ribonucleoproteins A2/B1	HNRNPA2B1;Hnrnpa2b1	2	22	22	67.4	37429	353	3.73E-208	0.58573	0.70214	25933	126	0.52419	0.688	31956	125	0.88356	0.99664	21.46	124
O88593	O88593	Peptidoglycan recognition protein 1	Pglyrp1	1	1	1	12.6	20489	182	2.22E-09	NaN	NaN	NaN	0	NaN	NaN	NaN	0	NaN	NaN	NaN	0
O88597;Q14457	O88597;Q14457	Beclin-1	Becn1;BECN1	2	3	3	9.8	51588	448	1.07E-07	NaN	NaN	NaN	1	NaN	NaN	NaN	1	NaN	NaN	NaN	1
Q16739;O88693	Q16739;O88693	Ceramide glucosyltransferase	UGCG;Ugcg	2	3	3	11.9	44853	394	1.16E-09	0.17635	0.24045	47.24	2	0.20301	0.25032	45833	2	11396	10824	53692	2
Q13363;O88712	Q13363;O88712	C-terminal-binding protein 1	CTBP1;Ctbp1	2	9	6	30.9	47535	440	1.45E-50	0.77001	0.86594	17249	14	0.69077	0.81466	46618	14	0.81038	0.8831	46296	14
O88796	O88796	Ribonuclease P protein subunit p30	Rpp30	1	2	1	9.3	29473	268	3.86E-05	0.92898	0.9027	16059	3	0.6912	0.69996	27125	3	0.74709	0.80851	10804	3
P78560;O88843	P78560;O88843	Death domain-containing protein CRADD	CRADD;Cradd	2	2	2	7	22745	199	7.80E-06	NaN	NaN	NaN	1	NaN	NaN	NaN	1	NaN	NaN	NaN	1
O88844	O88844	Isocitrate dehydrogenase [NADP] cytoplasmic	Idh1	1	18	4	44.7	46674	414	8.95E-116	NaN	NaN	NaN	0	NaN	NaN	NaN	0	NaN	NaN	NaN	0
Q9H0F7;O88848	Q9H0F7;O88848	ADP-ribosylation factor-like protein 6	ARL6;Arl6	2	2	2	12.4	21097	186	1.61E-05	13404	17169	5957	2	13731	18223	32909	2	0.87385	0.85165	28122	2
O88851	O88851	Putative hydrolase RBBP9	Rbbp9	1	3	2	26.9	20911	186	9.10E-16	NaN	NaN	NaN	0	NaN	NaN	NaN	0	NaN	NaN	NaN	0
O88947	O88947	Coagulation factor X;Factor X light chain;Factor X heavy chain;Activated factor Xa heavy chain	F10	1	7	7	20	54017	481	4.48E-16	NaN	NaN	NaN	1	NaN	NaN	NaN	0	NaN	NaN	NaN	1
Q9NUP9;O88952;Q9HAP6;O88951;Q8JZS0;O14910	Q9NUP9;O88952	Protein lin-7 homolog C	LIN7C;Lin7c	6	4	4	22.8	21834	197	2.72E-21	NaN	NaN	NaN	1	NaN	NaN	NaN	1	NaN	NaN	NaN	1
O88968	O88968	Transcobalamin-2	Tcn2	1	1	1	2.8	47585	430	0.0014213	NaN	NaN	NaN	0	NaN	NaN	NaN	0	NaN	NaN	NaN	0
O88990;Q08043	O88990;Q08043	Alpha-actinin-3	Actn3;ACTN3	2	27	18	33.9	103.04	900	2.39E-168	NaN	NaN	NaN	0	NaN	NaN	NaN	0	NaN	NaN	NaN	0
O89017	O89017	Legumain	Lgmn	1	3	2	8.5	49372	435	1.15E-26	NaN	NaN	NaN	0	NaN	NaN	NaN	0	NaN	NaN	NaN	0
O89020;P43652	O89020	Afamin	Afm	2	12	12	24.3	69378	608	5.24E-37	NaN	NaN	NaN	0	NaN	NaN	NaN	0	NaN	NaN	NaN	0
O89023	O89023	Tripeptidyl-peptidase 1	Tpp1	1	2	2	6.2	61341	562	3.46E-06	NaN	NaN	NaN	0	NaN	NaN	NaN	0	NaN	NaN	NaN	0
Q9UL63;O89050	Q9UL63;O89050	Muskelin	MKLN1;Mkln1	2	10	10	19.2	84767	735	3.03E-23	0.68564	0.84126	14.76	6	0.78181	1015	47084	6	12287	12445	44511	6
O89053;P31146	O89053;P31146	Coronin-1A	Coro1a;CORO1A	2	15	13	26.2	50989	461	3.21E-44	NaN	NaN	NaN	1	NaN	NaN	NaN	1	NaN	NaN	NaN	1
O89079	O89079	Coatomer subunit epsilon	Cope	1	5	4	27.3	34567	308	2.91E-49	NaN	NaN	NaN	0	NaN	NaN	NaN	0	NaN	NaN	NaN	0
O89086	O89086	Putative RNA-binding protein 3	Rbm3	1	5	3	42.5	16604	153	1.03E-24	NaN	NaN	NaN	0	NaN	NaN	NaN	0	NaN	NaN	NaN	0
O89110	O89110	Caspase-8;Caspase-8 subunit p18;Caspase-8 subunit p10	Casp8	1	3	3	6.5	55356	480	1.34E-06	NaN	NaN	NaN	0	NaN	NaN	NaN	0	NaN	NaN	NaN	0
O94760	O94760	N(G),N(G)-dimethylarginine dimethylaminohydrolase 1	DDAH1	1	4	3	17.5	31121	285	3.75E-12	10917	12847	52274	6	0.96801	11386	26565	6	0.89474	0.99153	58548	6
O94763	O94763	Unconventional prefoldin RPB5 interactor 1	URI1	1	2	2	6.4	59832	535	5.38E-06	NaN	NaN	NaN	1	NaN	NaN	NaN	1	NaN	NaN	NaN	1
O94776;Q9R190	O94776;Q9R190	Metastasis-associated protein MTA2	MTA2;Mta2	2	17	15	28.6	75022	668	1.71E-64	0.52864	0.62466	31528	23	0.51533	0.64944	44882	22	0.97772	0.99204	32.82	23
O94804	O94804	Serine/threonine-protein kinase 10	STK10	1	12	6	16.2	112.13	968	6.81E-86	11116	1809	30231	15	13248	16147	60.06	17	0.85688	0.97847	58757	17
O94806;Q8K1Y2;Q62101	O94806;Q8K1Y2	Serine/threonine-protein kinase D3	PRKD3;Prkd3	3	6	5	10.3	100.47	890	4.58E-33	0.69968	10851	17.87	9	0.66627	0.94868	35774	9	0.89743	10303	36695	9
O94822;Q6A009	O94822	E3 ubiquitin-protein ligase listerin	LTN1	2	10	10	8.4	200.55	1766	2.65E-28	11548	14676	15216	8	11454	15527	44845	8	0.8985	10803	42049	8
O94826;Q9CZW5	O94826;Q9CZW5	Mitochondrial import receptor subunit TOM70	TOMM70A;Tomm70a	2	21	21	45.2	67454	608	3.50E-149	0.68738	0.73663	27455	28	0.65081	0.68215	23511	28	0.98995	10996	20711	28
Q8K0C1;O94829	Q8K0C1;O94829	Importin-13	Ipo13;IPO13	2	1	1	1.1	108.23	963	2.90E-06	NaN	NaN	NaN	0	NaN	NaN	NaN	0	NaN	NaN	NaN	0
O94830;Q80Y98	O94830;Q80Y98	Phospholipase DDHD2	DDHD2;Ddhd2	2	3	3	5.2	81031	711	2.91E-07	19655	16935	24628	2	14652	13855	30803	2	0.74786	0.82576	19559	2
O94832;Q5SYD0	O94832;Q5SYD0	Unconventional myosin-Id	MYO1D;Myo1d	2	19	16	23.3	116.2	1006	2.30E-55	0.73282	0.99563	35466	18	0.63543	0.97875	55043	18	0.88991	0.98086	55629	18
O94842;Q66JW3;O94900;Q80W03;O15405;Q8BU11	O94842;Q66JW3;O94900;Q80W03;O15405;Q8BU11	TOX high mobility group box family member 4;Thymocyte selection-associated high mobility group box protein TOX;TOX high mobility group box family member 3	TOX4;Tox;TOX;Tox3;TOX3;Tox4	6	2	2	3.4	66194	621	8.18E-09	NaN	NaN	NaN	0	NaN	NaN	NaN	0	NaN	NaN	NaN	0
O94851	O94851	Protein-methionine sulfoxide oxidase MICAL2	MICAL2	1	5	4	5.3	126.69	1124	3.90E-14	NaN	NaN	NaN	1	NaN	NaN	NaN	1	NaN	NaN	NaN	1
O94854	O94854	Uncharacterized protein KIAA0754	KIAA0754	1	1	1	1.5	135.15	1291	0.0013274	NaN	NaN	NaN	0	NaN	NaN	NaN	0	NaN	NaN	NaN	0
O94855	O94855	Protein transport protein Sec24D	SEC24D	1	7	6	9.6	113.01	1032	8.15E-17	0.77196	13118	69845	5	0.81265	10857	34076	5	0.74145	0.86477	30695	5
O94864	O94864	STAGA complex 65 subunit gamma	SUPT7L	1	2	2	6	46192	414	5.07E-05	NaN	NaN	NaN	1	NaN	NaN	NaN	1	NaN	NaN	NaN	1
O94874	O94874	E3 UFM1-protein ligase 1	UFL1	1	12	6	17.5	89594	794	1.33E-30	0.61004	0.87193	46028	6	0.54679	1063	27993	6	0.93687	0.95684	15975	6
O94875	O94875	Sorbin and SH3 domain-containing protein 2	SORBS2	1	1	1	1.9	124.11	1100	0.0011715	NaN	NaN	NaN	0	NaN	NaN	NaN	0	NaN	NaN	NaN	0
O94880;Q9D4H9	O94880;Q9D4H9	PHD finger protein 14	PHF14;Phf14	2	5	5	6.4	100.05	888	2.21E-22	0.55734	0.67613	19285	4	0.48949	0.55292	22.19	4	0.87927	0.99588	36771	4
O94885;P59808;P57725;Q9NSI8	O94885;P59808	SAM and SH3 domain-containing protein 1	SASH1;Sash1	4	3	3	3.8	136.65	1247	4.55E-08	NaN	NaN	NaN	1	NaN	NaN	NaN	1	NaN	NaN	NaN	1
O94887	O94887	FERM, RhoGEF and pleckstrin domain-containing protein 2	FARP2	1	2	2	2.8	119.89	1054	3.66E-08	NaN	NaN	NaN	1	NaN	NaN	NaN	1	NaN	NaN	NaN	1
O94888;Q6P5G6	O94888	UBX domain-containing protein 7	UBXN7	2	10	10	25.8	54862	489	7.23E-53	0.89797	10007	14297	7	0.78405	0.99696	27169	7	0.82945	0.99066	46307	7
O94901	O94901	SUN domain-containing protein 1	SUN1	1	9	9	16	90063	812	6.00E-34	0.70307	13896	95367	18	0.71482	12407	68.59	18	12703	11063	37.04	18
O94903;Q9Z2Y8	O94903;Q9Z2Y8	Proline synthase co-transcribed bacterial homolog protein	PROSC;Prosc	2	3	3	14.2	30344	275	1.38E-10	NaN	NaN	NaN	0	NaN	NaN	NaN	0	NaN	NaN	NaN	0
O94905;Q8BFZ9	O94905;Q8BFZ9	Erlin-2	ERLIN2;Erlin2	2	5	4	20.9	37839	339	1.53E-38	NaN	NaN	NaN	1	NaN	NaN	NaN	1	NaN	NaN	NaN	1
O94906;Q91YR7	O94906;Q91YR7	Pre-mRNA-processing factor 6	PRPF6;Prpf6	2	25	25	28.9	106.92	941	3.95E-92	0.48447	0.65147	44059	11	0.50819	0.75757	60937	11	11694	11131	42801	11
O94913	O94913	Pre-mRNA cleavage complex 2 protein Pcf11	PCF11	1	4	4	4.4	173.05	1555	2.96E-12	0.38076	0.50457	6764	2	0.28901	0.43523	65733	2	0.68489	0.7483	90779	2
O94915	O94915	Protein furry homolog-like	FRYL	1	10	10	4.5	339.59	3013	3.46E-31	13981	13615	20314	5	11277	12539	28332	5	0.90103	10055	15706	5
O94919	O94919	Endonuclease domain-containing 1 protein	ENDOD1	1	4	4	10	55016	500	3.96E-13	0.53922	0.59641	47.41	7	0.51767	0.63899	36588	7	12469	13291	50972	7
O94923;Q9EPS3	O94923;Q9EPS3	D-glucuronyl C5-epimerase	GLCE;Glce	2	1	1	1.9	70.1	617	4.85E-05	NaN	NaN	NaN	1	NaN	NaN	NaN	1	NaN	NaN	NaN	1
O94925	O94925	Glutaminase kidney isoform, mitochondrial	GLS	1	14	3	24.5	73.46	669	4.87E-162	0.5568	0.83492	36988	23	0.53931	0.6732	43637	22	0.98983	1117	22729	22
O94927	O94927	HAUS augmin-like complex subunit 5	HAUS5	1	2	2	3.8	71682	633	4.37E-06	0.98049	14324	34.87	2	0.39519	0.58512	136.38	2	0.36057	0.38466	104.1	2
Q8VDH1;O94952	Q8VDH1;O94952	F-box only protein 21	Fbxo21;FBXO21	2	1	1	3.7	72172	627	1.63E-21	NaN	NaN	NaN	1	NaN	NaN	NaN	1	NaN	NaN	NaN	1
O94953	O94953	Lysine-specific demethylase 4B	KDM4B	1	1	1	2.1	121.9	1096	2.00E-05	NaN	NaN	NaN	1	NaN	NaN	NaN	1	NaN	NaN	NaN	1
O94966	O94966	Ubiquitin carboxyl-terminal hydrolase 19	USP19	1	9	7	12.4	145.65	1318	2.48E-53	10572	10871	21007	11	0.96038	12031	35699	11	0.96358	10548	34579	11
O94967;Q8CGF6	O94967	WD repeat-containing protein 47	WDR47	2	3	3	6.1	101.95	919	3.78E-11	NaN	NaN	NaN	1	NaN	NaN	NaN	1	NaN	NaN	NaN	1
O94973	O94973	AP-2 complex subunit alpha-2	AP2A2	1	19	1	26.6	103.96	939	1.74E-114	0.86933	0.79483	21182	2	0.85838	0.84614	49919	2	10118	11815	48081	2
O94979	O94979	Protein transport protein Sec31A	SEC31A	1	25	11	23.8	133.01	1220	2.98E-91	11346	14727	74487	28	11749	14413	66547	28	0.85984	0.96108	35961	28
O94992;Q8R409;Q96MH2	O94992;Q8R409	Protein HEXIM1	HEXIM1;Hexim1	3	11	11	57.7	40623	359	7.39E-68	0.6106	0.62988	17958	13	0.5179	0.67227	30585	13	0.8382	0.93241	18486	13
O95070	O95070	Protein YIF1A	YIF1A	1	1	1	6.5	32011	293	0.00054267	NaN	NaN	NaN	0	NaN	NaN	NaN	0	NaN	NaN	NaN	0
O95071;Q80TP3	O95071;Q80TP3	E3 ubiquitin-protein ligase UBR5	UBR5;Ubr5	2	19	19	9.9	309.35	2799	1.09E-41	0.81543	0.89102	29.55	13	0.74967	10415	26714	12	10317	11009	16481	13
O95104	O95104	Splicing factor, arginine/serine-rich 15	SCAF4	1	10	8	14.2	125.87	1147	5.99E-86	0.55757	0.48721	91692	3	0.4584	0.53489	22.11	3	0.79471	0.95384	21721	3
O95139	O95139	NADH dehydrogenase [ubiquinone] 1 beta subcomplex subunit 6	NDUFB6	1	2	2	25.8	15489	128	1.50E-10	0.62192	0.97148	11465	2	0.87396	13924	18314	2	13546	14035	21101	2
O95140;Q80U63	O95140;Q80U63	Mitofusin-2	MFN2;Mfn2	2	18	17	32	86401	757	3.63E-59	0.81587	10725	37.25	16	0.69675	1149	63617	16	10328	10351	56404	16
O95147;Q9JLY7	O95147;Q9JLY7	Dual specificity protein phosphatase 14	DUSP14;Dusp14	2	2	2	14.6	22255	198	0.00021499	NaN	NaN	NaN	0	NaN	NaN	NaN	0	NaN	NaN	NaN	0
O95155;Q9ES00	O95155;Q9ES00	Ubiquitin conjugation factor E4 B	UBE4B;Ube4b	2	10	10	9.7	146.18	1302	1.37E-54	0.73948	15367	37292	5	0.71189	11694	25.5	5	10161	0.87991	20309	5
O95159;Q9DB43	O95159;Q9DB43	Zinc finger protein-like 1	ZFPL1;Zfpl1	2	2	2	8.1	34114	310	1.55E-05	10714	0.79762	82689	6	0.66918	0.71798	45233	6	0.88205	0.8836	40696	6
O95163;Q7TT37	O95163	Elongator complex protein 1	IKBKAP	2	11	11	10.1	150.25	1332	9.67E-32	0.78272	16313	29163	7	0.99298	1648	38426	7	0.99875	10194	28726	7
Q9Z2M6;O95164	Q9Z2M6;O95164	Ubiquitin-like protein 3	Ubl3;UBL3	2	3	3	23.9	13.18	117	5.25E-07	0.2232	0.43528	29851	3	0.25723	0.53102	20099	3	1067	11841	14396	3
O95168	O95168	NADH dehydrogenase [ubiquinone] 1 beta subcomplex subunit 4	NDUFB4	1	5	4	44.2	15208	129	1.34E-10	0.55098	0.92521	25681	5	0.69435	0.94082	14029	5	10645	12562	23911	5
O95169;Q9D6J5	O95169;Q9D6J5	NADH dehydrogenase [ubiquinone] 1 beta subcomplex subunit 8, mitochondrial	NDUFB8;Ndufb8	2	2	2	10.8	21766	186	8.26E-06	0.84202	0.92426	17717	2	0.84918	0.98312	29846	2	1037	11263	91007	2
O95178	O95178	NADH dehydrogenase [ubiquinone] 1 beta subcomplex subunit 2, mitochondrial	NDUFB2	1	2	2	8.6	12058	105	3.77E-05	NaN	NaN	NaN	1	NaN	NaN	NaN	1	NaN	NaN	NaN	1
O95182;Q9Z1P6	O95182	NADH dehydrogenase [ubiquinone] 1 alpha subcomplex subunit 7	NDUFA7	2	5	5	51.3	12551	113	1.08E-35	0.92839	0.92412	19.01	10	0.90128	11419	17187	10	10871	12015	20859	10
O95197	O95197	Reticulon-3	RTN3	1	10	8	19.3	112.61	1032	2.15E-71	0.65803	0.53389	53723	13	0.55461	0.58094	26855	12	0.97973	0.9455	39749	12
O95202;Q9Z2I0	O95202	LETM1 and EF-hand domain-containing protein 1, mitochondrial	LETM1	2	22	22	34.5	83353	739	1.04E-98	0.46449	0.55393	38659	26	0.44187	0.61422	25499	26	0.92593	10736	31404	25
O95210	O95210	Starch-binding domain-containing protein 1	STBD1	1	2	2	5.6	39007	358	0.00011017	NaN	NaN	NaN	1	NaN	NaN	NaN	1	NaN	NaN	NaN	1
Q9R020;O95218	Q9R020;O95218	Zinc finger Ran-binding domain-containing protein 2	Zranb2;ZRANB2	2	5	5	17.9	37.35	330	1.93E-26	0.52932	0.89204	17586	8	0.61212	0.91126	35805	8	11298	10193	27828	8
O95219;Q91YJ2	O95219	Sorting nexin-4	SNX4	2	6	6	15.8	51908	450	1.34E-52	0.97283	20702	32354	3	0.9168	16602	51.11	3	0.98205	10015	18245	3
Q5SUF2;O95232	Q5SUF2;O95232	Luc7-like protein 3	Luc7l3;LUC7L3	2	14	14	31.5	51.45	432	6.54E-130	0.57509	0.69176	28235	14	0.50342	0.69795	44918	15	10726	10712	35221	15
O95235	O95235	Kinesin-like protein KIF20A	KIF20A	1	3	3	4.6	100.28	890	5.49E-24	0.74233	0.72043	115.49	3	0.46495	0.53464	109.71	3	0.71777	0.84146	18176	3
O95239;Q2VIQ3;P33174	O95239;Q2VIQ3;P33174	Chromosome-associated kinesin KIF4A;Chromosome-associated kinesin KIF4B;Chromosome-associated kinesin KIF4	KIF4A;KIF4B;Kif4	3	13	12	14	139.88	1232	2.45E-33	0.51678	0.62642	60484	9	0.39173	0.4893	66.91	9	0.9068	0.94735	21556	9
O95248;Q6ZPE2	O95248;Q6ZPE2	Myotubularin-related protein 5	SBF1;Sbf1	2	6	5	3.1	208.31	1867	5.87E-14	12079	14644	52317	2	13725	14556	41304	2	11212	10309	6686	2
O95249;O88630	O95249;O88630	Golgi SNAP receptor complex member 1	GOSR1;Gosr1	2	2	2	9.6	28612	250	2.49E-05	NaN	NaN	NaN	1	NaN	NaN	NaN	1	NaN	NaN	NaN	1
O95251;Q5SVQ0	O95251;Q5SVQ0	Histone acetyltransferase KAT7	KAT7;Kat7	2	5	5	11.6	70642	611	9.69E-17	0.70884	0.63824	17334	6	0.68068	0.6593	18.81	6	0.89907	0.94617	19261	6
O95260	O95260	Arginyl-tRNA--protein transferase 1	ATE1	1	5	5	18.5	59.09	518	2.74E-16	10663	20684	100.83	3	0.71976	12438	98504	3	0.88284	0.7228	30.72	3
O95273	O95273	Cyclin-D1-binding protein 1	CCNDBP1	1	1	1	5	40262	360	0.0010467	NaN	NaN	NaN	0	NaN	NaN	NaN	0	NaN	NaN	NaN	0
O95292	O95292	Vesicle-associated membrane protein-associated protein B/C	VAPB	1	8	4	37.4	27228	243	1.09E-43	0.45154	0.44076	52.04	15	0.49732	0.49074	55289	15	1117	1216	17794	15
O95298;Q9CQ54	O95298;Q9CQ54	NADH dehydrogenase [ubiquinone] 1 subunit C2	NDUFC2;Ndufc2	2	2	2	13.4	14187	119	2.40E-05	NaN	NaN	NaN	0	NaN	NaN	NaN	0	NaN	NaN	NaN	0
O95299	O95299	NADH dehydrogenase [ubiquinone] 1 alpha subcomplex subunit 10, mitochondrial	NDUFA10	1	10	10	31.3	40.75	355	3.61E-30	0.99848	0.85305	21608	16	10991	0.96625	68929	16	0.89778	10215	52931	16
O95302;Q9Z247;Q75LS8	O95302;Q9Z247	Peptidyl-prolyl cis-trans isomerase FKBP9	FKBP9;Fkbp9	3	10	10	18.9	63083	570	2.53E-27	0.5294	0.83377	35402	11	0.57029	0.72899	47.05	11	10879	11125	51852	11
Q9Z0H4;O95319	Q9Z0H4;O95319	CUGBP Elav-like family member 2	Celf2;CELF2	2	11	8	22.6	54.27	508	6.69E-50	0.89384	10977	19093	22	0.77376	10273	31691	22	0.84925	0.95314	29252	22
O95336	O95336	6-phosphogluconolactonase	PGLS	1	10	7	55.8	27547	258	9.23E-36	17208	17342	23169	14	15751	16814	27.88	14	0.90677	0.90805	13853	14
O95347;Q8CG48	O95347;Q8CG48	Structural maintenance of chromosomes protein 2	SMC2;Smc2	2	23	23	24.4	135.65	1197	1.53E-92	0.84833	0.78676	44.99	24	0.79837	0.80615	39298	24	0.87545	0.97468	31419	24
O95352	O95352	Ubiquitin-like modifier-activating enzyme ATG7	ATG7	1	8	2	13.7	77959	703	1.10E-18	16054	20384	50917	8	13008	19694	48492	8	0.85365	0.86162	44864	8
O95359;Q9JJG0	O95359	Transforming acidic coiled-coil-containing protein 2	TACC2	2	5	4	1.7	309.42	2948	4.82E-13	0.77149	11664	38128	2	0.7949	11831	22.37	2	1016	10267	13479	2
O95365	O95365	Zinc finger and BTB domain-containing protein 7A	ZBTB7A	1	2	2	5.8	61438	584	1.22E-05	NaN	NaN	NaN	1	NaN	NaN	NaN	1	NaN	NaN	NaN	1
Q9WTL7;O95372	Q9WTL7;O95372	Acyl-protein thioesterase 2	Lypla2;LYPLA2	2	3	3	26.4	24794	231	1.60E-30	15805	19461	27.43	6	21207	23002	54988	6	0.86477	0.96418	35.28	6
Q9EPL8;O95373	Q9EPL8;O95373	Importin-7	Ipo7;IPO7	2	20	20	25.9	119.49	1038	5.02E-109	0.82356	0.98713	62874	24	0.74571	10435	70735	24	0.87786	10159	33491	24
O95376;Q9Z1K6	O95376;Q9Z1K6	E3 ubiquitin-protein ligase ARIH2	ARIH2;Arih2	2	11	11	31.8	57818	493	9.91E-53	0.55669	11845	24187	8	0.86449	13943	64267	8	10219	10924	62905	8
Q8BHJ9;O95391	Q8BHJ9;O95391	Pre-mRNA-splicing factor SLU7	Slu7;SLU7	2	3	3	7.9	68079	585	2.49E-12	NaN	NaN	NaN	0	NaN	NaN	NaN	0	NaN	NaN	NaN	0
O95394;Q9CYR6	O95394;Q9CYR6	Phosphoacetylglucosamine mutase	PGM3;Pgm3	2	7	7	16.2	59851	542	1.81E-21	10503	17399	29259	9	10842	20334	56181	9	0.68349	0.71692	38689	9
O95400;Q9CWK3	O95400	CD2 antigen cytoplasmic tail-binding protein 2	CD2BP2	2	8	8	27	37646	341	4.69E-41	0.4253	0.82411	34026	6	0.70533	10533	38.47	6	11088	11111	15977	6
O95425;Q8K4L3	O95425	Supervillin	SVIL	2	3	3	2.4	247.74	2214	3.86E-21	NaN	NaN	NaN	1	NaN	NaN	NaN	1	NaN	NaN	NaN	1
O95433	O95433	Activator of 90 kDa heat shock protein ATPase homolog 1	AHSA1	1	11	4	39.1	38274	338	6.05E-30	0.73387	12817	27.8	9	0.78656	13029	28039	9	10351	0.97405	15696	9
O95453;Q8VDG3	O95453	Poly(A)-specific ribonuclease PARN	PARN	2	7	7	14.1	73.45	639	2.04E-21	NaN	NaN	NaN	1	NaN	NaN	NaN	1	NaN	NaN	NaN	1
O95456;Q9JK23	O95456	Proteasome assembly chaperone 1	PSMG1	2	3	3	12.8	32854	288	4.33E-14	17313	17346	33838	3	0.9518	10669	114.37	3	0.52617	0.61192	74928	3
O95470	O95470	Sphingosine-1-phosphate lyase 1	SGPL1	1	7	7	19.2	63523	568	3.23E-22	0.37771	0.79512	61703	5	0.50122	0.99957	63891	5	13623	1309	12349	5
Q9CR47;O95478	Q9CR47;O95478	Ribosome biogenesis protein NSA2 homolog	Nsa2;NSA2	2	3	3	13.1	30036	260	1.61E-09	0.24975	0.3783	20137	2	0.23119	0.35074	11375	2	0.81693	0.80525	82884	2
O95486;Q3U2P1	O95486	Protein transport protein Sec24A	SEC24A	2	13	13	15	119.75	1093	1.32E-85	13537	13396	37229	11	11422	13117	46.29	11	0.8138	0.90027	29208	11
O95487	O95487	Protein transport protein Sec24B	SEC24B	1	11	11	11.8	137.42	1268	2.11E-60	11075	14481	28903	17	0.99588	14162	37973	17	0.90587	0.99523	34976	17
O95563;Q9D023	O95563;Q9D023	Mitochondrial pyruvate carrier 2	MPC2;Mpc2	2	3	3	30.7	14279	127	1.23E-11	0.42627	0.84439	12916	2	0.17779	0.34671	90503	2	0.38414	0.35437	92792	2
O95571	O95571	Protein ETHE1, mitochondrial	ETHE1	1	7	6	42.5	27873	254	9.80E-23	NaN	NaN	NaN	1	NaN	NaN	NaN	1	NaN	NaN	NaN	1
O95573;Q9CZW4	O95573	Long-chain-fatty-acid--CoA ligase 3	ACSL3	2	28	26	45.7	80419	720	4.07E-177	0.4408	0.90619	59078	33	0.55833	0.7995	48739	33	13925	12666	42133	33
O95602;O35134	O95602	DNA-directed RNA polymerase I subunit RPA1	POLR1A	2	24	24	20.6	194.81	1720	3.86E-131	0.42889	0.64987	31829	16	0.47747	0.62783	35377	16	10585	10873	18508	16
Q9CR11;O95619	Q9CR11;O95619	YEATS domain-containing protein 4	Yeats4;YEATS4	2	5	5	25.6	26529	227	7.24E-22	0.38459	0.74693	28025	3	0.33965	0.63757	21429	3	0.88249	10078	20596	3
O95628	O95628	CCR4-NOT transcription complex subunit 4	CNOT4	1	1	1	4.5	63509	575	6.97E-25	0.95513	14148	37736	2	0.92226	13855	37384	2	0.87104	0.86862	33147	2
O95630	O95630	STAM-binding protein	STAMBP	1	7	7	23.3	48076	424	2.17E-19	15218	13429	24.71	7	12676	13296	11018	7	0.83426	0.95133	84704	7
O95639;Q8BQZ5	O95639;Q8BQZ5	Cleavage and polyadenylation specificity factor subunit 4	CPSF4;Cpsf4	2	8	8	38.3	30255	269	8.15E-23	0.59772	0.84803	44534	3	0.71062	0.98015	48357	3	0.99205	11801	86878	3
O95644	O95644	Nuclear factor of activated T-cells, cytoplasmic 1	NFATC1	1	3	3	7.3	101.24	943	1.92E-07	NaN	NaN	NaN	0	NaN	NaN	NaN	0	NaN	NaN	NaN	0
O95674	O95674	Phosphatidate cytidylyltransferase 2	CDS2	1	2	2	8.5	51417	445	8.93E-10	0.57179	0.94763	51102	2	0.86757	1249	56195	2	15321	14863	1593	2
O95677;Q9Z191	O95677;Q9Z191	Eyes absent homolog 4	EYA4;Eya4	2	2	2	6.9	69504	639	6.49E-14	NaN	NaN	NaN	1	NaN	NaN	NaN	1	NaN	NaN	NaN	1
O95684	O95684	FGFR1 oncogene partner	FGFR1OP	1	4	4	21.6	43064	399	6.36E-26	13982	12053	81883	3	13678	15234	13549	3	0.94053	10802	10109	3
O95696	O95696	Bromodomain-containing protein 1	BRD1	1	4	4	6.9	119.52	1058	2.46E-09	NaN	NaN	NaN	1	NaN	NaN	NaN	1	NaN	NaN	NaN	1
O95707;Q9CR08	O95707;Q9CR08	Ribonuclease P protein subunit p29	POP4;Pop4	2	3	3	19.1	25424	220	8.23E-11	0.2876	0.40322	17321	2	0.33144	0.45938	20807	2	10756	10445	30755	2
O95714;Q4U2R1	O95714	E3 ubiquitin-protein ligase HERC2	HERC2	2	6	6	2	527.22	4834	5.01E-13	0.65111	0.63207	16432	3	0.61193	0.834	11675	3	0.88994	10494	16233	3
P35276;O95716	P35276;O95716	Ras-related protein Rab-3D	Rab3d;RAB3D	2	5	2	26	24416	219	5.53E-16	NaN	NaN	NaN	0	NaN	NaN	NaN	0	NaN	NaN	NaN	0
O95721	O95721	Synaptosomal-associated protein 29	SNAP29	1	5	5	23.6	28.97	258	1.80E-20	13333	11237	16612	8	12445	10599	98075	8	0.97753	10398	8185	8
O95747;Q6P9R2	O95747;Q6P9R2	Serine/threonine-protein kinase OSR1	OXSR1;Oxsr1	2	12	9	31.5	58022	527	2.09E-88	10595	16637	32582	20	10727	15477	49922	20	0.88936	0.98856	34608	20
O95749;Q9WTN0	O95749;Q9WTN0	Geranylgeranyl pyrophosphate synthase	GGPS1;Ggps1	2	4	4	16.3	34.87	300	1.07E-13	14896	2096	79336	2	1606	22659	30761	2	13405	13757	41113	2
O95757	O95757	Heat shock 70 kDa protein 4L	HSPA4L	1	23	12	36.8	94511	839	3.27E-130	12469	13932	43659	21	0.97473	11639	48734	21	0.77463	0.85235	19673	21
O95758;Q8BHD7	O95758;Q8BHD7	Polypyrimidine tract-binding protein 3	PTBP3;Ptbp3	2	11	8	27.2	59689	552	3.98E-41	0.7683	1003	38336	10	0.84141	11217	29656	10	11363	10877	25648	10
O95772	O95772	MLN64 N-terminal domain homolog	STARD3NL	1	1	1	9.8	26654	234	5.31E-16	NaN	NaN	NaN	0	NaN	NaN	NaN	0	NaN	NaN	NaN	0
Q6ZWM4;O95777	Q6ZWM4;O95777	N-alpha-acetyltransferase 38, NatC auxiliary subunit	Naa38;NAA38	2	4	4	43.8	10403	96	5.28E-12	14078	12894	18215	6	14089	1329	87.99	6	0.93636	0.99938	81783	6
O95782;P17426	O95782;P17426	AP-2 complex subunit alpha-1	AP2A1;Ap2a1	2	31	24	39	107.54	977	9.13E-150	0.43981	0.74821	32409	21	0.58276	0.80438	52609	22	0.95652	0.9762	51573	21
O95785;O88286	O95785	Protein Wiz	WIZ	2	6	6	5.6	178.67	1651	2.27E-20	0.46883	0.61804	53173	4	0.51455	0.70633	31435	4	0.98006	11199	12687	4
O95786	O95786	Probable ATP-dependent RNA helicase DDX58	DDX58	1	12	10	15.9	106.6	925	4.64E-33	NaN	NaN	NaN	1	NaN	NaN	NaN	1	NaN	NaN	NaN	1
O95793;Q9Z108	O95793	Double-stranded RNA-binding protein Staufen homolog 1	STAU1	2	18	17	40.2	63182	577	1.43E-103	0.48567	0.88414	21093	24	0.6042	0.75418	25628	25	0.83711	0.91692	20779	25
O95801;Q8R3H9	O95801	Tetratricopeptide repeat protein 4	TTC4	2	11	11	38	44678	387	2.41E-67	30078	19652	39023	7	21594	16525	41755	7	0.97868	10142	5128	7
O95817	O95817	BAG family molecular chaperone regulator 3	BAG3	1	7	3	16.3	61594	575	2.40E-19	0.80044	10455	28032	13	0.66336	0.98084	38459	13	0.89502	0.90776	29664	13
P97820;O95819;Q9JM52;Q8N4C8	P97820;O95819	Mitogen-activated protein kinase kinase kinase kinase 4	Map4k4;MAP4K4	4	3	2	4	140.6	1233	4.50E-09	0.84342	0.87197	14419	2	0.62164	0.69274	20105	2	0.76759	0.86303	10.15	2
O95825	O95825	Quinone oxidoreductase-like protein 1	CRYZL1	1	2	2	7.7	38696	349	2.63E-05	NaN	NaN	NaN	1	NaN	NaN	NaN	1	NaN	NaN	NaN	1
O95831	O95831	Apoptosis-inducing factor 1, mitochondrial	AIFM1	1	22	11	47.1	66.9	613	2.02E-124	0.47805	0.72183	34131	35	0.44684	0.59461	45242	35	0.94346	0.95653	49724	35
O95834;Q7TNG5	O95834	Echinoderm microtubule-associated protein-like 2	EML2	2	9	8	21.9	70678	649	2.00E-22	11937	24146	27124	4	12017	21806	49562	4	0.91262	0.93015	29492	4
Q9D142;O95848	Q9D142;O95848	Uridine diphosphate glucose pyrophosphatase	Nudt14;NUDT14	2	2	2	9	24443	222	3.42E-05	NaN	NaN	NaN	1	NaN	NaN	NaN	1	NaN	NaN	NaN	1
O95857;Q9D8C2	O95857;Q9D8C2	Tetraspanin-13	TSPAN13;Tspan13	2	2	2	14.2	22147	204	0.00018368	NaN	NaN	NaN	1	NaN	NaN	NaN	1	NaN	NaN	NaN	1
O95861	O95861	3(2),5-bisphosphate nucleotidase 1	BPNT1	1	10	7	36.4	33392	308	4.90E-47	0.48059	0.98863	35493	5	0.67906	1201	40823	5	12545	11884	18004	5
O95865	O95865	N(G),N(G)-dimethylarginine dimethylaminohydrolase 2	DDAH2	1	5	2	20.7	29644	285	8.48E-17	NaN	NaN	NaN	0	NaN	NaN	NaN	0	NaN	NaN	NaN	0
Q9Z1Q2;O95870	Q9Z1Q2;O95870	Abhydrolase domain-containing protein 16A	Abhd16a;ABHD16A	2	2	2	5	63085	558	3.54E-05	0.8815	17694	27098	2	0.75903	13122	20.51	2	0.95245	0.84095	17.39	2
O95873;Q9Z1R4	O95873;Q9Z1R4	Uncharacterized protein C6orf47;Uncharacterized protein C6orf47 homolog	C6orf47;D17h6s53e	2	2	2	11.2	31.71	294	5.83E-06	0.36691	0.46563	38671	3	0.53953	0.52514	50267	3	0.98956	0.9146	76181	3
O95881	O95881	Thioredoxin domain-containing protein 12	TXNDC12	1	5	1	34.9	19206	172	2.61E-19	0.92928	0.80233	21316	6	0.65458	0.76882	27354	6	0.83752	0.97005	33738	6
O95900	O95900	Probable tRNA pseudouridine synthase 2	TRUB2	1	1	1	4.2	36694	331	0.001115	NaN	NaN	NaN	1	NaN	NaN	NaN	1	NaN	NaN	NaN	1
O95905;Q9CS74	O95905	Protein SGT1	ECD	2	9	9	23.3	72757	644	7.26E-29	13204	12837	38181	4	0.96969	11232	54338	4	0.72916	0.80777	22098	4
O95983;Q9Z2D8	O95983;Q9Z2D8	Methyl-CpG-binding domain protein 3	MBD3;Mbd3	2	5	5	18.6	32844	291	4.37E-12	NaN	NaN	NaN	1	NaN	NaN	NaN	1	NaN	NaN	NaN	1
Q9Z321;O95985	Q9Z321;O95985	DNA topoisomerase 3-beta-1	Top3b;TOP3B	2	3	3	4.8	96948	862	4.44E-07	NaN	NaN	NaN	1	NaN	NaN	NaN	1	NaN	NaN	NaN	1
Q9JI46;O95989	Q9JI46;O95989	Diphosphoinositol polyphosphate phosphohydrolase 1	Nudt3;NUDT3	2	2	1	9.5	19029	168	3.94E-05	NaN	NaN	NaN	0	NaN	NaN	NaN	0	NaN	NaN	NaN	0
Q9Z0H7;O95999	Q9Z0H7;O95999	B-cell lymphoma/leukemia 10	Bcl10;BCL10	2	2	2	10.3	25948	233	6.69E-05	NaN	NaN	NaN	0	NaN	NaN	NaN	0	NaN	NaN	NaN	0
O96000;Q9DCS9	O96000	NADH dehydrogenase [ubiquinone] 1 beta subcomplex subunit 10	NDUFB10	2	9	9	51.2	20776	172	6.79E-31	0.87544	0.97287	39722	13	0.88196	10377	31378	13	10537	10414	25432	13
O96005	O96005	Cleft lip and palate transmembrane protein 1	CLPTM1	1	6	2	18.8	76096	669	3.33E-16	NaN	NaN	NaN	0	NaN	NaN	NaN	0	NaN	NaN	NaN	0
O96006	O96006	Zinc finger BED domain-containing protein 1	ZBED1	1	4	4	7.6	78155	694	5.07E-09	0.87066	12389	44207	3	0.67032	0.73831	50431	3	10117	0.91236	96166	3
O96008;Q9QYA2	O96008	Mitochondrial import receptor subunit TOM40 homolog	TOMM40	2	7	7	35.2	37893	361	5.61E-41	0.40206	0.76566	13842	3	0.52976	0.92757	17771	3	10792	11795	22517	3
O96013;Q8BTW9	O96013;Q8BTW9	Serine/threonine-protein kinase PAK 4	PAK4;Pak4	2	2	2	2.9	64071	591	0.00025893	NaN	NaN	NaN	1	NaN	NaN	NaN	1	NaN	NaN	NaN	1
O96017;Q9Z265	O96017;Q9Z265	Serine/threonine-protein kinase Chk2	CHEK2;Chek2	2	2	2	5.3	60914	543	2.25E-06	0.3076	0.65445	14089	2	0.44279	0.83442	43601	2	13374	11905	27923	2
O96019;Q9Z2N8	O96019;Q9Z2N8	Actin-like protein 6A	ACTL6A;Actl6a	2	12	10	40.8	47.46	429	9.22E-51	0.98672	1074	25.57	17	0.92609	0.96284	37.35	17	0.99384	10116	39014	17
O96028;Q8BVE8	O96028	Histone-lysine N-methyltransferase NSD2	WHSC1	2	11	11	12.9	152.26	1365	1.90E-50	0.38113	0.36143	46.08	10	0.34618	0.37849	59516	10	0.88529	10351	23923	10
P00338;Q6ZMR3;P00342;P07864	P00338	L-lactate dehydrogenase A chain	LDHA	4	17	12	49.7	36688	332	2.78E-160	16788	23609	36025	90	15734	18152	42373	90	0.94215	10009	43587	90
P00367	P00367	Glutamate dehydrogenase 1, mitochondrial	GLUD1	1	24	2	45.9	61397	558	5.58E-144	0.76246	10496	30215	75	0.94489	10676	39215	75	1043	11125	29.4	75
P00374;P00375;Q86XF0	P00374	Dihydrofolate reductase	DHFR	3	9	9	48.7	21452	187	2.44E-23	23477	21437	58937	6	23747	26165	78888	6	1105	11009	24751	6
P00387	P00387	NADH-cytochrome b5 reductase 3;NADH-cytochrome b5 reductase 3 membrane-bound form;NADH-cytochrome b5 reductase 3 soluble form	CYB5R3	1	7	5	30.2	34234	301	2.04E-36	0.54031	0.54142	43232	26	0.6042	0.65493	31217	26	11109	12528	42612	26
P00390	P00390	Glutathione reductase, mitochondrial	GSR	1	8	3	20.1	56256	522	1.03E-38	17978	18646	20676	8	15374	16529	29.76	8	0.97061	10816	26036	8
P00403	P00403	Cytochrome c oxidase subunit 2	MT-CO2	1	3	2	15	25565	227	1.51E-10	12388	14139	28077	12	12098	14019	35919	12	0.87211	0.98483	15685	12
P00405	P00405	Cytochrome c oxidase subunit 2	Mtco2	1	2	1	11.9	25976	227	1.02E-05	NaN	NaN	NaN	0	NaN	NaN	NaN	0	NaN	NaN	NaN	0
P00441	P00441	Superoxide dismutase [Cu-Zn]	SOD1	1	3	3	32.5	15936	154	3.16E-39	19223	15909	37.68	13	14016	16587	27903	13	0.83802	0.92496	12792	13
P00491	P00491	Purine nucleoside phosphorylase	PNP	1	13	12	56.1	32118	289	3.05E-54	22275	15603	43	22	18525	1.54	42393	22	0.90806	0.98222	27095	22
P00492	P00492	Hypoxanthine-guanine phosphoribosyltransferase	HPRT1	1	10	2	52.8	24579	218	8.08E-44	15452	1645	19583	18	12108	13271	43201	18	0.79142	0.87663	41592	18
P00493;Q9NRG1	P00493	Hypoxanthine-guanine phosphoribosyltransferase	Hprt1	2	9	1	48.2	24.57	218	1.78E-40	NaN	NaN	NaN	0	NaN	NaN	NaN	0	NaN	NaN	NaN	0
P00505	P00505	Aspartate aminotransferase, mitochondrial	GOT2	1	22	9	50.9	47517	430	1.01E-101	0.5469	0.92	27413	30	0.52874	0.8501	34179	30	10008	0.94671	37173	30
P00533	P00533	Epidermal growth factor receptor	EGFR	1	10	4	10.6	134.28	1210	1.65E-22	NaN	NaN	NaN	0	NaN	NaN	NaN	0	NaN	NaN	NaN	0
P00558;P09041;P07205	P00558	Phosphoglycerate kinase 1	PGK1	3	26	10	68.8	44614	417	0	15799	23405	29418	159	1305	17517	28093	159	0.83329	0.92705	33221	159
P00568;Q9Y6K8;Q920P5	P00568	Adenylate kinase isoenzyme 1	AK1	3	7	5	36.1	21635	194	2.38E-29	28539	20245	58555	8	28446	2716	62651	8	0.83644	0.86935	29762	8
P00687;P00688	P00687;P00688	Alpha-amylase 1;Pancreatic alpha-amylase	Amy1;Amy2	2	5	3	15.1	57643	511	7.79E-11	NaN	NaN	NaN	1	NaN	NaN	NaN	1	NaN	NaN	NaN	1
P00750	P00750	Tissue-type plasminogen activator;Tissue-type plasminogen activator chain A;Tissue-type plasminogen activator chain B	PLAT	1	1	1	4.1	62916	562	9.65E-16	NaN	NaN	NaN	0	NaN	NaN	NaN	0	NaN	NaN	NaN	0
P00813	P00813	Adenosine deaminase	ADA	1	4	3	11.8	40764	363	1.93E-10	0.56952	11055	22793	3	0.54695	11303	31105	3	0.91293	0.87023	28035	3
P00846	P00846	ATP synthase subunit a	MT-ATP6	1	1	1	4.4	24817	226	6.33E-05	0.55903	0.77665	26.76	2	0.3411	0.50748	53602	2	0.58295	0.61514	79696	2
P00918	P00918	Carbonic anhydrase 2	CA2	1	4	3	25	29246	260	1.98E-12	12618	25475	13017	2	21867	39073	42819	2	13321	11968	22133	2
P00920	P00920	Carbonic anhydrase 2	Ca2	1	9	8	53.8	29032	260	4.36E-81	NaN	NaN	NaN	0	NaN	NaN	NaN	0	NaN	NaN	NaN	0
P16460;P00966	P16460;P00966	Argininosuccinate synthase	Ass1;ASS1	2	2	2	5.8	46584	412	1.18E-05	NaN	NaN	NaN	0	NaN	NaN	NaN	0	NaN	NaN	NaN	0
P00973	P00973	2-5-oligoadenylate synthase 1	OAS1	1	6	6	19.8	46028	400	1.80E-21	NaN	NaN	NaN	0	NaN	NaN	NaN	0	NaN	NaN	NaN	0
P01027	P01027	Complement C3;Complement C3 beta chain;Complement C3 alpha chain;C3a anaphylatoxin;Acylation stimulating protein;Complement C3b alpha chain;Complement C3c alpha chain fragment 1;Complement C3dg fragment;Complement C3g fragment;Complement C3d fragment;Complement C3f fragment;Complement C3c alpha chain fragment 2	C3	1	78	65	51.1	186.48	1663	0	17.1	23417	141.79	4	37204	48693	103.72	4	10474	1221	192.26	5
P01029;P0C0L5;P0C0L4	P01029	Complement C4-B;Complement C4 beta chain;Complement C4 alpha chain;C4a anaphylatoxin;Complement C4 gamma chain	C4b	3	41	36	26.4	192.91	1738	5.04E-234	47097	68024	102.59	3	20495	39862	85.2	3	0.2661	0.23183	143.59	3
P01033	P01033	Metalloproteinase inhibitor 1	TIMP1	1	3	3	20.3	23171	207	2.61E-07	0.90765	0.80722	36504	4	11992	1063	33412	4	13873	1416	54293	4
P08556;P01111;Q61411;P01112	P08556;P01111;Q61411;P01112	GTPase NRas;GTPase HRas;GTPase HRas, N-terminally processed	Nras;NRAS;Hras1;HRAS	4	6	4	41.3	21199	189	1.28E-19	0.53469	11244	39418	2	0.26335	0.49868	40764	2	0.49172	0.42338	57.92	2
P32883;P01116	P32883;P01116	GTPase KRas;GTPase KRas, N-terminally processed	Kras;KRAS	2	3	1	27	21656	189	2.15E-11	NaN	NaN	NaN	0	NaN	NaN	NaN	0	NaN	NaN	NaN	0
P01130;P35951	P01130	Low-density lipoprotein receptor	LDLR	2	15	15	24.3	95375	860	1.35E-106	0.72633	0.74954	37773	8	0.77444	0.95022	79297	8	11281	12721	40269	8
P01831	P01831	Thy-1 membrane glycoprotein	Thy1	1	2	2	16	18.08	162	4.01E-06	NaN	NaN	NaN	0	NaN	NaN	NaN	0	NaN	NaN	NaN	0
P01887	P01887	Beta-2-microglobulin	B2m	1	2	2	27.7	13779	119	6.89E-12	NaN	NaN	NaN	0	NaN	NaN	NaN	0	NaN	NaN	NaN	0
P01898	P01898	H-2 class I histocompatibility antigen, Q10 alpha chain	H2-Q10	1	9	5	32	37251	325	5.45E-20	NaN	NaN	NaN	0	NaN	NaN	NaN	0	NaN	NaN	NaN	0
P01899;P14428;P03991	P01899	H-2 class I histocompatibility antigen, D-B alpha chain	H2-D1	3	10	1	32.9	40836	362	4.53E-29	NaN	NaN	NaN	1	NaN	NaN	NaN	1	NaN	NaN	NaN	1
P01901;P14426	P01901;P14426	H-2 class I histocompatibility antigen, K-B alpha chain;H-2 class I histocompatibility antigen, D-K alpha chain	H2-K1;H2-D1	2	7	0	18.2	41301	369	5.43E-23	NaN	NaN	NaN	0	NaN	NaN	NaN	0	NaN	NaN	NaN	0
P01902	P01902	H-2 class I histocompatibility antigen, K-D alpha chain	H2-K1	1	8	4	23.4	41489	368	4.58E-31	NaN	NaN	NaN	0	NaN	NaN	NaN	0	NaN	NaN	NaN	0
P01921;P06342	P01921;P06342	H-2 class II histocompatibility antigen, A-D beta chain;H-2 class II histocompatibility antigen, A-Q beta chain	H2-Ab1	2	2	2	7.5	29954	265	0.00012198	NaN	NaN	NaN	0	NaN	NaN	NaN	0	NaN	NaN	NaN	0
P01942	P01942	Hemoglobin subunit alpha	Hba	1	6	3	43	15085	142	3.01E-43	70239	155.27	175.26	8	45608	73983	160.65	8	0.6327	0.54996	38431	8
P02088;P02089;P02104;P02100	P02088;P02089	Hemoglobin subunit beta-1;Hemoglobin subunit beta-2	Hbb-b1;Hbb-b2	4	9	7	61.2	15.84	147	1.15E-150	55285	86356	192.13	5	23784	4681	192.09	5	0.5759	0.49798	35695	5
Q71DI3;Q16695;P84244;P84243;P84228;P68433;P68431;P02301;Q6NXT2	Q71DI3;Q16695;P84244;P84243;P84228;P68433;P68431;P02301;Q6NXT2	Histone H3.2;Histone H3.1t;Histone H3.3;Histone H3.1;Histone H3.3C	HIST2H3A;HIST3H3;H3f3a;H3F3A;Hist1h3b;Hist1h3a;HIST1H3A;H3f3c;H3F3C	9	6	6	25.7	15388	136	6.26E-29	0.43661	0.64443	55.65	24	0.72805	0.7842	51372	24	17052	20314	94116	24
P02463;P02462;P29400	P02463;P02462;P29400	Collagen alpha-1(IV) chain;Arresten;Collagen alpha-5(IV) chain	Col4a1;COL4A1;COL4A5	3	4	4	3.3	160.68	1669	1.80E-09	14768	31728	85054	2	64957	13166	106.01	2	0.40572	0.35	6233	2
P02468;Q9Y6N6;Q9R0B6	P02468	Laminin subunit gamma-1	Lamc1	3	69	39	51.3	177.3	1607	0	8.19	85551	208.85	11	83576	15314	151.71	11	10043	0.86772	124.1	11
P02469	P02469	Laminin subunit beta-1	Lamb1	1	65	39	47.1	197.09	1786	0	36585	78353	210.99	20	23937	20271	126.97	20	0.25352	0.21582	133.15	20
P02511;P23927	P02511;P23927	Alpha-crystallin B chain	CRYAB;Cryab	2	4	4	21.7	20159	175	2.88E-19	NaN	NaN	NaN	0	NaN	NaN	NaN	0	NaN	NaN	NaN	0
P02545;REV__Q5VX52	P02545	Prelamin-A/C;Lamin-A/C	LMNA	2	52	8	67.9	74139	664	0	0.66117	0.70228	30488	224	0.56024	0.71568	33534	225	0.95035	10388	26144	225
P02649	P02649	Apolipoprotein E	APOE	1	16	12	50.5	36154	317	5.18E-101	10347	19151	25568	18	12458	19805	37.66	18	12678	10441	35572	18
P02656	P02656	Apolipoprotein C-III	APOC3	1	1	1	16.2	10852	99	8.77E-07	NaN	NaN	NaN	0	NaN	NaN	NaN	0	NaN	NaN	NaN	0
P02686	P02686	Myelin basic protein	MBP	1	4	1	21.4	33117	304	2.72E-35	NaN	NaN	NaN	1	NaN	NaN	NaN	1	NaN	NaN	NaN	1
P02751	P02751	Fibronectin;Anastellin;Ugl-Y1;Ugl-Y2;Ugl-Y3	FN1	1	24	3	13.7	262.62	2386	1.63E-168	NaN	NaN	NaN	0	NaN	NaN	NaN	0	NaN	NaN	NaN	0
P02765	P02765	Alpha-2-HS-glycoprotein;Alpha-2-HS-glycoprotein chain A;Alpha-2-HS-glycoprotein chain B	AHSG	1	3	1	7.9	39324	367	1.73E-10	NaN	NaN	NaN	0	NaN	NaN	NaN	0	NaN	NaN	NaN	0
P02776;P10720	P02776;P10720	Platelet factor 4;Platelet factor 4, short form;Platelet factor 4 variant;Platelet factor 4 variant(4-74);Platelet factor 4 variant(5-74);Platelet factor 4 variant(6-74)	PF4;PF4V1	2	3	2	35.6	10845	101	5.60E-16	NaN	NaN	NaN	0	NaN	NaN	NaN	0	NaN	NaN	NaN	0
P02786;Q62351;Q9JKX3;Q9UP52	P02786	Transferrin receptor protein 1;Transferrin receptor protein 1, serum form	TFRC	4	35	35	50.5	84.87	760	1.86E-231	0.18294	0.26614	56243	38	0.17309	0.18486	83868	38	0.81015	0.91991	71382	38
P02794;P09528	P02794	Ferritin heavy chain	FTH1	2	5	5	30.6	21225	183	8.89E-20	0.50275	0.68159	35261	7	0.32347	0.49164	31705	7	0.83388	0.73698	34266	7
P04733;P02802	P04733;P02802	Metallothionein-1F;Metallothionein-1	MT1F;Mt1	2	1	1	19.7	60863	61	5.34E-08	NaN	NaN	NaN	1	NaN	NaN	NaN	1	NaN	NaN	NaN	1
P03886	P03886	NADH-ubiquinone oxidoreductase chain 1	MT-ND1	1	1	1	6.3	35.66	318	0.0021609	NaN	NaN	NaN	1	NaN	NaN	NaN	1	NaN	NaN	NaN	1
P03928	P03928	ATP synthase protein 8	MT-ATP8	1	3	3	48.5	79916	68	2.89E-13	0.66569	0.84726	53.05	7	0.75964	10407	48.43	7	11014	12193	44.4	7
P03930	P03930	ATP synthase protein 8	Mtatp8	1	1	1	14.9	77662	67	0.00019088	NaN	NaN	NaN	0	NaN	NaN	NaN	0	NaN	NaN	NaN	0
P03953	P03953	Complement factor D	Cfd	1	3	3	22.8	28057	259	3.06E-08	NaN	NaN	NaN	0	NaN	NaN	NaN	0	NaN	NaN	NaN	0
P04040	P04040	Catalase	CAT	1	17	14	34.7	59755	527	2.85E-67	0.94833	0.9636	41054	24	1009	11435	47645	24	10591	10186	29924	24
P04062	P04062	Glucosylceramidase	GBA	1	13	9	28.7	59716	536	2.07E-56	0.39786	0.44315	21911	14	0.35225	0.5291	25934	14	10883	10994	20.42	14
P04066;Q99LJ1	P04066	Tissue alpha-L-fucosidase	FUCA1	2	4	4	13.1	53688	466	4.53E-11	0.63593	0.60543	21703	6	0.5695	0.62344	34152	6	0.89947	10393	33.81	6
P04075	P04075	Fructose-bisphosphate aldolase A	ALDOA	1	30	6	85.2	39.42	364	0	22928	25968	30476	164	19683	23528	42454	165	0.90068	0.93736	32048	165
P04080	P04080	Cystatin-B	CSTB	1	7	7	79.6	11139	98	2.24E-43	1739	30265	33493	22	15901	26189	49667	22	0.84286	0.89995	29492	22
P04083	P04083	Annexin A1	ANXA1	1	4	3	15.6	38714	346	1.45E-40	NaN	NaN	NaN	1	NaN	NaN	NaN	1	NaN	NaN	NaN	1
P04114	P04114	Apolipoprotein B-100;Apolipoprotein B-48	APOB	1	10	7	2.3	515.6	4563	1.38E-36	NaN	NaN	NaN	0	NaN	NaN	NaN	0	NaN	NaN	NaN	0
P04117;P15090;P02689;P24526;O08716	P04117;P15090	Fatty acid-binding protein, adipocyte	Fabp4;FABP4	5	7	6	50	14.65	132	6.04E-117	NaN	NaN	NaN	1	NaN	NaN	NaN	1	NaN	NaN	NaN	1
P04179	P04179	Superoxide dismutase [Mn], mitochondrial	SOD2	1	8	4	26.6	24722	222	5.47E-22	19161	18826	55785	5	19571	13847	105.32	5	11292	11341	37157	5
P04181	P04181	Ornithine aminotransferase, mitochondrial;Ornithine aminotransferase, hepatic form;Ornithine aminotransferase, renal form	OAT	1	17	13	39.9	48534	439	7.79E-158	0.54745	0.69548	32.18	33	0.48471	0.56301	81167	33	0.92551	10307	79.25	33
P04183;P04184	P04183;P04184	Thymidine kinase, cytosolic	TK1;Tk1	2	7	7	30.8	25468	234	1.29E-17	0.48148	0.83159	50967	4	0.46332	0.83591	19438	4	10699	10264	33475	4
P04186;P00751	P04186	Complement factor B;Complement factor B Ba fragment;Complement factor B Bb fragment	Cfb	2	16	15	25.1	85004	761	2.07E-64	NaN	NaN	NaN	1	NaN	NaN	NaN	1	NaN	NaN	NaN	1
P04228;P14435;P14437;P14436;P23150;P04227;P14438;P14434;P01910	P04228;P14435;P14437;P14436;P23150	H-2 class II histocompatibility antigen, A-D alpha chain;H-2 class II histocompatibility antigen, A-F alpha chain;H-2 class II histocompatibility antigen, A-S alpha chain;H-2 class II histocompatibility antigen, A-R alpha chain;H-2 class II histocompatibility antigen, I-E alpha chain	H2-Aa	9	4	4	22.7	28243	256	2.10E-13	NaN	NaN	NaN	0	NaN	NaN	NaN	0	NaN	NaN	NaN	0
P04247	P04247	Myoglobin	Mb	1	2	2	20.8	17069	154	3.84E-16	NaN	NaN	NaN	0	NaN	NaN	NaN	0	NaN	NaN	NaN	0
P04264;CON__P04264;CON__ENSEMBL:ENSBTAP00000038253;P04104;Q6IFZ9;Q9R0H5;CON__Q9R0H5;Q6NXH9;CON__Q6NXH9;Q6IFZ6;CON__Q6IFZ6;Q7Z794;CON__Q7Z794;Q3TTY5;CON__Q3TTY5	P04264;CON__P04264	Keratin, type II cytoskeletal 1	KRT1	15	10	6	18.8	66038	644	7.37E-36	12582	23605	161.9	3	0.61372	11053	126.82	3	0.51169	0.47072	55372	3
Q9D6F9;P04350	Q9D6F9;P04350	Tubulin beta-4A chain	Tubb4a;TUBB4A	2	23	3	63.7	49585	444	6.18E-277	0.72378	15125	27838	17	0.86787	1.55	63936	17	0.98113	1.01	48999	17
P04370	P04370	Myelin basic protein	Mbp	1	4	1	18	27167	250	3.06E-17	28848	39524	148.72	6	16396	21708	114.15	6	0.56611	0.54364	121.71	6
P04406;O14556	P04406	Glyceraldehyde-3-phosphate dehydrogenase	GAPDH	2	24	15	61.2	36053	335	2.03E-213	19016	21362	23835	215	16366	18698	52178	215	0.84857	0.91581	44359	214
P04627;P10398;Q99N57;P04049;P15056;P28028	P04627;P10398;Q99N57;P04049	Serine/threonine-protein kinase A-Raf;RAF proto-oncogene serine/threonine-protein kinase	Araf;ARAF;Raf1;RAF1	6	3	3	6	67581	604	4.75E-08	NaN	NaN	NaN	1	NaN	NaN	NaN	1	NaN	NaN	NaN	1
P04632;O88456;Q9D7J7;Q96L46	P04632;O88456	Calpain small subunit 1	CAPNS1;Capns1	4	6	6	26.9	28315	268	3.32E-17	11536	23812	77092	4	11829	22203	12672	4	1104	0.98466	23688	4
P04792	P04792	Heat shock protein beta-1	HSPB1	1	9	7	57.1	22782	205	2.49E-96	27203	3345	22766	31	25347	29799	28987	31	0.9858	10035	14392	31
P04818;P07607	P04818	Thymidylate synthase	TYMS	2	9	9	34.8	35716	313	5.85E-44	0.97633	0.90307	36073	10	11511	11937	67.45	10	0.97083	10889	36.16	10
P04843	P04843	Dolichyl-diphosphooligosaccharide--protein glycosyltransferase subunit 1	RPN1	1	26	12	46.1	68569	607	2.99E-138	0.45194	0.91718	68.45	43	0.50548	0.68164	61145	43	12908	12328	62572	43
P04844	P04844	Dolichyl-diphosphooligosaccharide--protein glycosyltransferase subunit 2	RPN2	1	16	9	33.4	69283	631	3.44E-167	0.47163	0.52485	74242	18	0.35222	0.46019	32688	18	0.91269	0.99925	85483	18
P04899	P04899	Guanine nucleotide-binding protein G(i) subunit alpha-2	GNAI2	1	15	3	50.1	40.45	355	7.44E-59	0.76353	11361	45991	26	0.53087	0.82416	40312	25	0.7314	0.70907	32534	26
Q99878;Q96KK5;Q8CGP6;Q9BTM1;Q8R1M2;Q64523;Q16777;Q93077;Q8CGP7;Q8CGP5;Q8BFU2;Q7L7L0;Q6GSS7;Q6FI13;P22752;P20671;P0C0S8;P04908	Q99878;Q96KK5;Q8CGP6;Q9BTM1;Q8R1M2;Q64523;Q16777;Q93077;Q8CGP7;Q8CGP5;Q8BFU2;Q7L7L0;Q6GSS7;Q6FI13;P22752;P20671;P0C0S8;P04908	Histone H2A type 1-J;Histone H2A type 1-H;Histone H2A.J;Histone H2A type 2-C;Histone H2A type 1-C;Histone H2A type 1-K;Histone H2A type 1-F;Histone H2A type 3;Histone H2A type 2-A;Histone H2A type 1;Histone H2A type 1-D;Histone H2A type 1-B/E	HIST1H2AJ;HIST1H2AH;Hist1h2ah;H2AFJ;H2afj;Hist2h2ac;HIST2H2AC;HIST1H2AC;Hist1h2ak;Hist1h2af;Hist3h2a;HIST3H2A;Hist2h2aa1;HIST2H2AA3;Hist1h2ab;HIST1H2AD;HIST1H2AG;HIST1H2AB	18	6	2	33.6	13936	128	2.87E-52	0.49141	0.79381	35429	69	0.57804	0.777	33659	69	10009	10398	32832	69
P04919;P02730	P04919	Band 3 anion transport protein	Slc4a1	2	8	8	12.6	103.13	929	2.13E-34	NaN	NaN	NaN	0	NaN	NaN	NaN	0	NaN	NaN	NaN	0
P04920;P13808;P16283;P48751	P04920;P13808	Anion exchange protein 2	SLC4A2;Slc4a2	4	15	15	20.4	137.01	1241	1.70E-83	0.33034	0.36235	25677	6	0.30176	0.31865	17.14	6	0.86782	0.84748	26662	6
P04921	P04921	Glycophorin-C	GYPC	1	2	2	21.1	13.81	128	8.71E-52	0.38299	0.53804	31422	2	0.37211	0.57584	16229	2	0.99916	10415	38128	2
P05017	P05017	Insulin-like growth factor I	Igf1	1	1	1	9.8	17093	153	0.00097625	NaN	NaN	NaN	0	NaN	NaN	NaN	0	NaN	NaN	NaN	0
P05023;Q6PIE5;P50993;Q13733;Q64436;P20648	P05023	Sodium/potassium-transporting ATPase subunit alpha-1	ATP1A1	6	42	8	45.9	112.89	1023	0	0.25572	0.44981	40.43	71	0.25463	0.41068	49293	71	0.97011	0.97319	32094	71
P05026;P14094	P05026;P14094	Sodium/potassium-transporting ATPase subunit beta-1	ATP1B1;Atp1b1	2	7	7	29	35061	303	6.18E-20	0.54707	0.9511	72.69	5	0.45731	0.88151	146.92	5	10104	1005	90227	5
P05064	P05064	Fructose-bisphosphate aldolase A	Aldoa	1	28	4	81	39355	364	1.52E-226	NaN	NaN	NaN	0	NaN	NaN	NaN	0	NaN	NaN	NaN	0
P05067;P12023	P05067;P12023	Amyloid beta A4 protein;N-APP;Soluble APP-alpha;Soluble APP-beta;C99;Beta-amyloid protein 42;Beta-amyloid protein 40;C83;P3(42);P3(40);C80;Gamma-secretase C-terminal fragment 59;Gamma-secretase C-terminal fragment 57;Gamma-secretase C-terminal fragment 50;C31	APP;App	2	12	12	18.4	86942	770	6.30E-51	0.26186	0.4202	14669	4	0.20432	0.30499	50026	4	0.90502	0.89413	42095	4
P05089	P05089	Arginase-1	ARG1	1	1	1	3.4	34735	322	0.00068192	NaN	NaN	NaN	0	NaN	NaN	NaN	0	NaN	NaN	NaN	0
P05106;O54890	P05106	Integrin beta-3	ITGB3	2	8	8	12.7	87057	788	6.15E-23	NaN	NaN	NaN	0	NaN	NaN	NaN	0	NaN	NaN	NaN	0
P05114	P05114	Non-histone chromosomal protein HMG-14	HMGN1	1	4	4	47	10659	100	5.45E-42	0.50054	0.7363	45.18	6	0.70804	10043	49381	6	0.81913	10014	16854	6
P05132;P17612	P05132;P17612	cAMP-dependent protein kinase catalytic subunit alpha	Prkaca;PRKACA	2	6	3	20.2	40.57	351	3.02E-18	12037	18724	34032	5	10451	13759	61795	5	0.77805	0.88776	36298	5
P05141	P05141	ADP/ATP translocase 2	SLC25A5	1	19	0	46.6	32852	298	7.91E-120	0.57992	0.68562	46314	30	0.58735	0.6502	54061	30	10537	12168	50.23	30
P05161	P05161	Ubiquitin-like protein ISG15	ISG15	1	6	6	41.2	17887	165	5.92E-38	8974	11971	189.71	4	61.35	77.34	24162	4	62326	6093	222.83	4
P05166	P05166	Propionyl-CoA carboxylase beta chain, mitochondrial	PCCB	1	6	5	18.2	58215	539	9.66E-25	0.84914	0.99461	51484	5	12697	13083	64658	5	10884	13039	42513	5
P05198;Q6ZWX6	P05198;Q6ZWX6	Eukaryotic translation initiation factor 2 subunit 1	EIF2S1;Eif2s1	2	18	18	56.2	36112	315	6.56E-85	0.77118	11264	27126	33	0.76741	10792	33778	33	0.90108	0.97968	24435	33
P05201	P05201	Aspartate aminotransferase, cytoplasmic	Got1	1	10	2	31.7	46247	413	3.83E-51	NaN	NaN	NaN	0	NaN	NaN	NaN	0	NaN	NaN	NaN	0
P05202	P05202	Aspartate aminotransferase, mitochondrial	Got2	1	17	4	38.8	47411	430	1.15E-73	NaN	NaN	NaN	0	NaN	NaN	NaN	0	NaN	NaN	NaN	0
P68363;P05213;CON__ENSEMBL:ENSBTAP00000016242;A6NHL2;Q3UX10;Q9H853	P68363;P05213;CON__ENSEMBL:ENSBTAP00000016242	Tubulin alpha-1B chain	TUBA1B;Tuba1b	6	26	0	60.1	50151	451	0	19586	18209	36723	207	16566	17184	52447	207	0.88383	0.99549	30516	206
P05362	P05362	Intercellular adhesion molecule 1	ICAM1	1	10	10	25.6	57825	532	7.49E-42	0.34809	0.75037	19117	2	0.35919	0.59965	30585	2	0.99117	0.81822	21263	2
P05366	P05366	Serum amyloid A-1 protein	Saa1	1	2	1	26.2	13.77	122	1.26E-06	NaN	NaN	NaN	0	NaN	NaN	NaN	0	NaN	NaN	NaN	0
P05367	P05367	Serum amyloid A-2 protein;Amyloid protein A	Saa2	1	2	1	22.1	13622	122	1.93E-08	NaN	NaN	NaN	0	NaN	NaN	NaN	0	NaN	NaN	NaN	0
P05386	P05386	60S acidic ribosomal protein P1	RPLP1	1	3	2	66.7	11514	114	2.88E-50	14811	15581	42627	11	12494	16322	65592	11	0.90109	10797	30593	11
P05387	P05387	60S acidic ribosomal protein P2	RPLP2	1	9	1	93.9	11665	115	4.18E-174	0.91907	0.97181	60284	57	0.74656	0.93388	77532	57	0.90133	10115	29.42	57
P05388;Q8NHW5	P05388;Q8NHW5	60S acidic ribosomal protein P0;60S acidic ribosomal protein P0-like	RPLP0;RPLP0P6	2	14	2	58	34273	317	8.02E-128	0.94405	10002	24791	69	0.75426	0.9317	28.76	68	0.83199	0.98013	16571	69
P05413	P05413	Fatty acid-binding protein, heart	FABP3	1	3	1	26.3	14858	133	2.19E-07	47389	65367	84915	2	76909	10947	18121	2	16792	16059	90186	2
P05423;Q91WD1	P05423;Q91WD1	DNA-directed RNA polymerase III subunit RPC4	POLR3D;Polr3d	2	7	7	20.1	44395	398	4.11E-16	0.67253	0.63915	24.47	6	0.60954	0.75776	36284	6	10525	1117	23005	6
P05455	P05455	Lupus La protein	SSB	1	24	20	48.5	46836	408	1.08E-127	0.89316	0.96565	61497	48	0.79769	10732	92.28	48	0.83325	0.92392	71745	48
P12931;P05480	P12931;P05480	Proto-oncogene tyrosine-protein kinase Src;Neuronal proto-oncogene tyrosine-protein kinase Src	SRC;Src	2	7	5	17.2	59834	536	2.24E-23	0.70682	0.81449	23905	5	0.69932	0.87471	16489	5	10642	10163	22234	5
P05534;P30447	P05534;P30447	HLA class I histocompatibility antigen, A-24 alpha chain;HLA class I histocompatibility antigen, A-23 alpha chain	HLA-A	2	12	3	40.5	40688	365	7.94E-77	18277	12962	61585	10	16222	13859	25186	10	10528	11099	51378	10
P05549;P34056;Q61313;Q92481;Q6VUP9;Q6VUC0;Q61312;Q92754	P05549;P34056	Transcription factor AP-2-alpha	TFAP2A;Tfap2a	8	5	4	15.3	48062	437	1.77E-11	0.39091	0.80835	42713	2	0.57266	10766	19973	2	13942	12487	13359	2
P05555	P05555	Integrin alpha-M	Itgam	1	10	10	11.6	127.48	1153	2.14E-32	NaN	NaN	NaN	0	NaN	NaN	NaN	0	NaN	NaN	NaN	0
P05556	P05556	Integrin beta-1	ITGB1	1	19	10	24.8	88414	798	1.63E-75	0.34025	0.56322	46287	14	0.30146	0.47228	35932	14	0.87934	0.8373	46114	14
P05977;P05976;P09541;P08590;P12829	P05977;P05976	Myosin light chain 1/3, skeletal muscle isoform	Myl1;MYL1	5	9	7	61.2	20594	188	1.14E-61	NaN	NaN	NaN	0	NaN	NaN	NaN	0	NaN	NaN	NaN	0
P06132;P70697	P06132;P70697	Uroporphyrinogen decarboxylase	UROD;Urod	2	10	10	32.2	40786	367	1.48E-38	23352	19331	59821	12	20504	18657	77741	12	0.97098	10322	27236	12
P06151	P06151	L-lactate dehydrogenase A chain	Ldha	1	15	10	44.3	36498	332	2.72E-89	NaN	NaN	NaN	0	NaN	NaN	NaN	0	NaN	NaN	NaN	0
P06213;P15208	P06213;P15208	Insulin receptor;Insulin receptor subunit alpha;Insulin receptor subunit beta	INSR;Insr	2	3	3	2.4	156.33	1382	9.15E-06	NaN	NaN	NaN	1	NaN	NaN	NaN	1	NaN	NaN	NaN	1
P39688;P06241	P39688;P06241	Tyrosine-protein kinase Fyn	Fyn;FYN	2	3	1	6.1	60655	537	3.56E-07	NaN	NaN	NaN	1	NaN	NaN	NaN	1	NaN	NaN	NaN	1
P06280;P51569	P06280	Alpha-galactosidase A	GLA	2	8	8	24.5	48766	429	1.77E-35	0.62522	0.99139	32868	2	0.43649	0.66835	33361	2	0.7325	0.73908	37437	2
P06396;REV__Q6TDU7	P06396	Gelsolin	GSN	2	19	8	34.3	85696	782	1.51E-156	1825	28343	39796	43	15687	23727	39702	43	0.93046	0.95784	33286	43
P06400;P13405	P06400	Retinoblastoma-associated protein	RB1	2	10	10	11.1	106.16	928	1.48E-31	0.94955	13196	43.02	6	0.84725	0.94968	30957	6	10246	10974	20103	6
P06454;P26350	P06454;P26350	Prothymosin alpha;Thymosin alpha-1;Prothymosin alpha;Thymosin alpha	PTMA;Ptma	2	6	6	37.8	12203	111	1.47E-33	17042	16748	42712	10	14435	17906	50927	10	0.95127	10183	34738	10
P06493;P11440	P06493;P11440	Cyclin-dependent kinase 1	CDK1;Cdk1	2	14	11	55.6	34095	297	2.99E-45	12224	12483	34846	21	12139	14837	24618	21	10481	11054	11411	21
P06576	P06576	ATP synthase subunit beta, mitochondrial	ATP5B	1	19	1	53.5	56559	529	1.51E-246	0.79799	10055	30036	121	0.82902	10167	43233	120	10862	11486	38952	120
P06683	P06683	Complement component C9	C9	1	10	10	24.3	62002	548	3.96E-50	NaN	NaN	NaN	0	NaN	NaN	NaN	0	NaN	NaN	NaN	0
P06702	P06702	Protein S100-A9	S100A9	1	1	1	13.2	13242	114	0.006231	NaN	NaN	NaN	0	NaN	NaN	NaN	0	NaN	NaN	NaN	0
P06728	P06728	Apolipoprotein A-IV	Apoa4	1	19	19	61.3	45029	395	7.52E-126	NaN	NaN	NaN	1	NaN	NaN	NaN	1	NaN	NaN	NaN	1
P63073;P06730;A6NMX2	P63073;P06730	Eukaryotic translation initiation factor 4E	Eif4e;EIF4E	3	7	7	33.2	25053	217	5.40E-31	11299	11951	29616	23	0.77904	11613	47.24	23	0.89751	0.94954	27.93	23
P06733	P06733	Alpha-enolase	ENO1	1	30	14	78.1	47168	434	0	19416	24576	31153	177	1819	22465	38762	177	0.90231	0.96654	33434	176
P06744	P06744	Glucose-6-phosphate isomerase	GPI	1	23	17	43.9	63146	558	1.99E-239	20794	24721	29555	105	19619	20654	46065	106	0.90546	0.97356	49753	105
P06745	P06745	Glucose-6-phosphate isomerase	Gpi	1	14	6	30.8	62766	558	6.85E-112	NaN	NaN	NaN	0	NaN	NaN	NaN	0	NaN	NaN	NaN	0
P06746;Q8K409	P06746;Q8K409	DNA polymerase beta	POLB;Polb	2	4	4	19.1	38177	335	6.98E-31	0.36287	0.52469	93.57	4	0.18401	0.18993	106.34	3	0.72338	0.83782	14066	4
P06748	P06748	Nucleophosmin	NPM1	1	14	4	65.6	32575	294	3.42E-241	0.52869	0.6146	38898	134	0.51837	0.68162	40474	134	0.99501	11092	32511	134
P06753;P21107	P06753;P21107	Tropomyosin alpha-3 chain	TPM3;Tpm3	2	12	4	36.3	32818	284	1.10E-51	1366	18609	26.37	16	10196	15585	44789	16	0.79576	0.82503	19707	16
P06756	P06756	Integrin alpha-V;Integrin alpha-V heavy chain;Integrin alpha-V light chain	ITGAV	1	16	9	18.8	116.04	1048	3.14E-39	0.32764	0.41507	58575	5	0.32812	0.31377	19455	5	0.96299	1103	51864	5
P06800;P08575	P06800	Receptor-type tyrosine-protein phosphatase C	Ptprc	2	9	9	12.2	144.6	1291	6.20E-30	NaN	NaN	NaN	0	NaN	NaN	NaN	0	NaN	NaN	NaN	0
P06801	P06801	NADP-dependent malic enzyme	Me1	1	11	5	24.8	63953	572	4.21E-32	NaN	NaN	NaN	0	NaN	NaN	NaN	0	NaN	NaN	NaN	0
P06865	P06865	Beta-hexosaminidase subunit alpha	HEXA	1	15	11	29.3	60702	529	3.29E-58	0.94347	11188	29.13	20	0.87881	11607	32669	20	10467	11363	20427	20
Q16778;P33778;P23527;P06899;Q9D2U9;Q8N257;Q8CGP0;Q64524;Q6DRA6;Q6DN03	Q16778;P33778;P23527;P06899;Q9D2U9;Q8N257;Q8CGP0;Q64524	Histone H2B type 2-E;Histone H2B type 1-B;Histone H2B type 1-O;Histone H2B type 1-J;Histone H2B type 3-A;Histone H2B type 3-B	HIST2H2BE;HIST1H2BB;HIST1H2BO;HIST1H2BJ;Hist3h2ba;HIST3H2BB;Hist3h2bb;Hist2h2be	10	6	2	41.3	13.92	126	2.34E-44	0.67576	0.7431	16986	10	0.61243	0.71416	23763	10	0.96671	11719	17545	10
P06909	P06909	Complement factor H	Cfh	1	39	39	43.2	139.14	1234	1.96E-188	NaN	NaN	NaN	1	NaN	NaN	NaN	1	NaN	NaN	NaN	1
P07093;Q07235	P07093	Glia-derived nexin	SERPINE2	2	6	6	14.6	44002	398	3.84E-17	0.56413	11968	15097	2	0.78264	13847	12743	2	14024	11071	41663	2
P07099	P07099	Epoxide hydrolase 1	EPHX1	1	16	15	32.3	52948	455	7.62E-65	0.73825	0.70907	50002	24	0.9994	11228	66808	24	14758	17217	79147	24
P07108	P07108	Acyl-CoA-binding protein	DBI	1	4	4	46	10044	87	1.84E-61	14313	16173	30913	28	12884	20475	35571	28	0.92372	10313	18337	28
P07195	P07195	L-lactate dehydrogenase B chain	LDHB	1	19	6	53.6	36638	334	5.53E-177	15393	15461	28851	133	11206	13932	48242	133	0.85613	0.96611	36545	133
P07196;P12036	P07196	Neurofilament light polypeptide	NEFL	2	11	3	23.2	61516	543	7.39E-43	0.97281	12717	39949	10	0.86226	11268	51026	10	0.79157	0.69908	42.51	10
P08553;P07197;Q16352;P46660	P08553;P07197;Q16352;P46660	Neurofilament medium polypeptide;Alpha-internexin	Nefm;NEFM;INA;Ina	4	5	2	6.1	95915	848	1.19E-12	NaN	NaN	NaN	0	NaN	NaN	NaN	0	NaN	NaN	NaN	0
P07199;P27790	P07199;P27790	Major centromere autoantigen B	CENPB;Cenpb	2	3	3	7	65171	599	2.78E-08	0.29146	0.42082	40683	2	0.39174	0.58925	21.31	2	12336	12075	20071	2
P07203	P07203	Glutathione peroxidase 1	GPX1	1	9	8	69.5	22106	203	9.92E-43	93558	10768	52795	19	95429	10132	66252	19	0.97141	10582	31977	19
P07214	P07214	SPARC	Sparc	1	6	2	24.2	34.45	302	1.15E-22	NaN	NaN	NaN	0	NaN	NaN	NaN	0	NaN	NaN	NaN	0
P07225	P07225	Vitamin K-dependent protein S	PROS1	1	2	2	6.1	75122	676	5.10E-17	0.30642	0.29605	43573	2	0.5188	0.60892	44609	2	13456	16305	23.93	2
P07237	P07237	Protein disulfide-isomerase	P4HB	1	34	10	65.9	57116	508	1.78E-202	0.40152	0.57354	39947	150	0.39744	0.51161	39931	150	0.99523	10133	44459	149
P10922;P07305	P10922;P07305	Histone H1.0	H1f0;H1F0	2	1	1	6.7	20861	194	0.0011999	NaN	NaN	NaN	1	NaN	NaN	NaN	1	NaN	NaN	NaN	1
P07309	P07309	Transthyretin	Ttr	1	5	5	34.7	15776	147	2.84E-73	NaN	NaN	NaN	1	NaN	NaN	NaN	1	NaN	NaN	NaN	1
P07310	P07310	Creatine kinase M-type	Ckm	1	14	5	46.5	43044	381	4.13E-146	NaN	NaN	NaN	1	NaN	NaN	NaN	1	NaN	NaN	NaN	1
P07311;P56376	P07311;P56376	Acylphosphatase-1	ACYP1;Acyp1	2	3	3	21.2	11261	99	1.57E-07	NaN	NaN	NaN	1	NaN	NaN	NaN	1	NaN	NaN	NaN	1
P07339	P07339	Cathepsin D;Cathepsin D light chain;Cathepsin D heavy chain	CTSD	1	20	19	49.8	44552	412	1.33E-174	0.78655	0.88719	42627	56	0.61848	0.7887	37796	56	0.84793	0.97463	16539	56
P07355;A6NMY6	P07355;A6NMY6	Annexin A2;Putative annexin A2-like protein	ANXA2;ANXA2P2	2	32	11	77.9	38604	339	0	15991	15402	54.31	185	14769	1609	60.41	184	0.97999	10885	30474	184
P07356;REV__Q8BND4;REV__Q5JSJ4	P07356	Annexin A2	Anxa2	3	28	7	73.2	38676	339	3.54E-302	NaN	NaN	NaN	0	NaN	NaN	NaN	0	NaN	NaN	NaN	0
P07361	P07361	Alpha-1-acid glycoprotein 2	Orm2	1	2	2	13.5	23843	207	1.33E-05	NaN	NaN	NaN	0	NaN	NaN	NaN	0	NaN	NaN	NaN	0
P07384	P07384	Calpain-1 catalytic subunit	CAPN1	1	26	21	35.3	81889	714	2.25E-85	0.97439	19989	63312	29	1093	19438	74529	29	0.96574	0.93162	49219	29
P99024;P07437	P99024;P07437	Tubulin beta-5 chain;Tubulin beta chain	Tubb5;TUBB	2	23	5	62.6	49.67	444	3.80E-258	20184	20518	21367	40	18031	19696	58241	40	0.86638	0.99703	43075	40
P07602	P07602	Proactivator polypeptide;Saposin-A;Saposin-B-Val;Saposin-B;Saposin-C;Saposin-D	PSAP	1	26	24	51.9	58112	524	2.84E-177	0.62801	0.77911	54591	56	0.56213	0.82517	75181	56	0.91997	10376	48091	56
P07686	P07686	Beta-hexosaminidase subunit beta;Beta-hexosaminidase subunit beta chain B;Beta-hexosaminidase subunit beta chain A	HEXB	1	19	17	35.4	63111	556	2.07E-70	0.7932	0.97223	29996	28	0.9322	0.99844	64434	28	0.94112	10417	52452	28
P07711;Q5NE16;P55097;P43235	P07711	Cathepsin L1;Cathepsin L1 heavy chain;Cathepsin L1 light chain	CTSL1	4	7	6	20.4	37564	333	3.78E-40	14569	12681	48605	7	13277	11922	50228	7	0.91692	1.01	15206	7
P07724	P07724	Serum albumin	Alb	1	52	48	79.3	68692	608	0	16184	34151	218.34	21	99589	16303	203.29	21	0.56009	0.43651	79.13	21
P07737	P07737	Profilin-1	PFN1	1	11	6	75	15054	140	9.29E-104	21079	22139	41098	58	15764	20307	50927	58	0.84081	0.91637	23543	58
P07741	P07741	Adenine phosphoribosyltransferase	APRT	1	8	5	33.9	19608	180	2.83E-27	0.63101	12526	48095	11	0.79667	12383	48187	11	0.98509	1094	25957	11
Q00896;P07758	Q00896;P07758	Alpha-1-antitrypsin 1-3;Alpha-1-antitrypsin 1-1	Serpina1c;Serpina1a	2	11	5	31.6	45823	412	6.83E-104	NaN	NaN	NaN	0	NaN	NaN	NaN	1	NaN	NaN	NaN	1
P07759;P29621	P07759	Serine protease inhibitor A3K	Serpina3k	2	21	15	49.8	46879	418	0	NaN	NaN	NaN	1	NaN	NaN	NaN	1	NaN	NaN	NaN	1
P07814	P07814	Bifunctional glutamate/proline--tRNA ligase;Glutamate--tRNA ligase;Proline--tRNA ligase	EPRS	1	64	40	46.4	170.59	1512	0	0.81367	0.92248	23113	106	0.71939	0.92086	38009	106	0.92088	10115	33589	106
P07858	P07858	Cathepsin B;Cathepsin B light chain;Cathepsin B heavy chain	CTSB	1	10	9	32.2	37821	339	1.77E-156	12738	14327	49324	26	0.86442	12955	43815	26	0.79364	0.80932	21711	26
P07900;Q14568;Q58FG0	P07900	Heat shock protein HSP 90-alpha	HSP90AA1	3	42	4	55.9	84659	732	0	11285	11416	34067	128	0.93448	11002	42893	128	0.88776	0.99664	30343	128
P07901	P07901	Heat shock protein HSP 90-alpha	Hsp90aa1	1	40	3	53.1	84787	733	2.69E-288	NaN	NaN	NaN	0	NaN	NaN	NaN	0	NaN	NaN	NaN	0
P07902;Q03249	P07902;Q03249	Galactose-1-phosphate uridylyltransferase	GALT;Galt	2	4	4	13.5	43363	379	1.68E-12	10963	22618	29732	2	0.66968	12941	61953	2	0.68104	0.65847	13575	2
P07910;O60812	P07910	Heterogeneous nuclear ribonucleoproteins C1/C2	HNRNPC	2	21	9	48	33.67	306	7.58E-102	0.48016	0.63096	42884	82	0.47458	0.59865	52943	82	0.90178	0.98381	37058	82
P07919	P07919	Cytochrome b-c1 complex subunit 6, mitochondrial	UQCRH	1	4	4	47.3	10739	91	2.53E-10	10298	15763	20855	4	1386	19567	16109	4	12514	12385	18929	4
P07942	P07942	Laminin subunit beta-1	LAMB1	1	32	6	23.9	198.04	1786	1.16E-264	0.98584	13211	28361	5	12488	15015	29838	5	10011	10212	10586	5
Q04736;P07947	Q04736;P07947	Tyrosine-protein kinase Yes	Yes1;YES1	2	3	1	6.7	60629	541	4.19E-09	NaN	NaN	NaN	1	NaN	NaN	NaN	1	NaN	NaN	NaN	1
P07948;P08631	P07948	Tyrosine-protein kinase Lyn	LYN	2	9	6	22.3	58573	512	1.03E-21	0.76791	10276	75647	5	0.56175	0.67449	54194	5	0.7258	0.85881	33705	5
P58774;P07951;CON__Q3SX28	P58774;P07951;CON__Q3SX28	Tropomyosin beta chain	Tpm2;TPM2	3	14	3	38	32836	284	3.27E-90	NaN	NaN	NaN	0	NaN	NaN	NaN	0	NaN	NaN	NaN	0
P07954	P07954	Fumarate hydratase, mitochondrial	FH	1	15	7	37.1	54636	510	1.07E-104	0.83121	10313	17059	37	0.85174	10907	40223	37	10491	11432	42377	37
P07992;P07903	P07992;P07903	DNA excision repair protein ERCC-1	ERCC1;Ercc1	2	2	2	9.1	32562	297	3.89E-06	10694	0.94345	97654	4	0.96862	1.06	53.41	4	0.74122	0.84225	44486	4
P08003	P08003	Protein disulfide-isomerase A4	Pdia4	1	28	6	38.2	71982	638	1.83E-195	NaN	NaN	NaN	1	NaN	NaN	NaN	1	NaN	NaN	NaN	1
P08032	P08032	Spectrin alpha chain, erythrocytic 1	Spta1	1	14	13	7.9	279.86	2415	8.63E-50	NaN	NaN	NaN	1	NaN	NaN	NaN	1	NaN	NaN	NaN	1
P08047	P08047	Transcription factor Sp1	SP1	1	1	1	3.6	80692	785	5.48E-09	NaN	NaN	NaN	1	NaN	NaN	NaN	1	NaN	NaN	NaN	1
P08069;Q60751	P08069	Insulin-like growth factor 1 receptor;Insulin-like growth factor 1 receptor alpha chain;Insulin-like growth factor 1 receptor beta chain	IGF1R	2	6	6	7.2	154.79	1367	5.01E-22	0.55856	0.55726	37627	4	0.52512	0.62397	33793	4	1019	10649	18.56	4
P08071	P08071	Lactotransferrin	Ltf	1	17	16	32.8	77837	707	4.88E-98	NaN	NaN	NaN	0	NaN	NaN	NaN	0	NaN	NaN	NaN	0
P08074	P08074	Carbonyl reductase [NADPH] 2	Cbr2	1	6	6	29.5	25958	244	1.12E-21	NaN	NaN	NaN	0	NaN	NaN	NaN	0	NaN	NaN	NaN	0
P08101;P08508	P08101;P08508	Low affinity immunoglobulin gamma Fc region receptor II;Low affinity immunoglobulin gamma Fc region receptor III	Fcgr2;Fcgr3	2	2	2	5.5	36695	330	8.88E-05	NaN	NaN	NaN	0	NaN	NaN	NaN	0	NaN	NaN	NaN	0
P08103	P08103	Tyrosine-protein kinase HCK	Hck	1	4	3	9.7	59129	524	4.21E-10	NaN	NaN	NaN	0	NaN	NaN	NaN	0	NaN	NaN	NaN	0
P08107	P08107	Heat shock 70 kDa protein 1A/1B	HSPA1A	1	29	10	54	70051	641	6.84E-223	13332	11757	42467	59	10318	11454	48766	59	0.86169	0.95044	31189	59
P08113	P08113	Endoplasmin	Hsp90b1	1	43	3	48	92475	802	0	NaN	NaN	NaN	0	NaN	NaN	NaN	0	NaN	NaN	NaN	0
P08121;P02461	P08121	Collagen alpha-1(III) chain	Col3a1	2	5	5	5.4	138.94	1464	4.31E-33	NaN	NaN	NaN	0	NaN	NaN	NaN	0	NaN	NaN	NaN	0
P08122;P08572	P08122;P08572	Collagen alpha-2(IV) chain;Canstatin	Col4a2;COL4A2	2	8	8	7.3	167.32	1707	3.50E-28	NaN	NaN	NaN	1	NaN	NaN	NaN	1	NaN	NaN	NaN	1
P08133	P08133	Annexin A6	ANXA6	1	41	22	63.9	75872	673	0	15811	13183	40616	127	14469	15176	58868	128	0.92169	0.9946	33964	128
Q62159;P08134	Q62159;P08134	Rho-related GTP-binding protein RhoC	Rhoc;RHOC	2	9	2	39.9	22006	193	3.82E-61	0.82253	17143	57592	3	0.45801	0.85818	22477	3	0.56629	0.52327	18317	3
P08183	P08183	Multidrug resistance protein 1	ABCB1	1	2	2	2.1	141.48	1280	5.69E-06	NaN	NaN	NaN	1	NaN	NaN	NaN	1	NaN	NaN	NaN	1
P08195	P08195	4F2 cell-surface antigen heavy chain	SLC3A2	1	23	22	37.5	67993	630	9.51E-225	0.28387	0.35614	51419	56	0.2888	0.37533	42314	56	10022	10323	45907	56
P08226	P08226	Apolipoprotein E	Apoe	1	11	10	38.6	35866	311	1.94E-52	NaN	NaN	NaN	0	NaN	NaN	NaN	0	NaN	NaN	NaN	0
P08228	P08228	Superoxide dismutase [Cu-Zn]	Sod1	1	4	4	32.5	15942	154	2.61E-33	NaN	NaN	NaN	0	NaN	NaN	NaN	0	NaN	NaN	NaN	0
P08236	P08236	Beta-glucuronidase	GUSB	1	6	5	10	74731	651	1.63E-13	1.15	10821	59942	3	11624	14822	37965	3	0.90215	10933	35469	3
P08237	P08237	6-phosphofructokinase, muscle type	PFKM	1	23	8	34.4	85182	780	1.22E-97	0.96676	17152	35692	32	10345	17182	47227	32	0.91957	0.95583	29737	32
P08238;P11499;Q58FF7;REV__Q8BL66	P08238;P11499	Heat shock protein HSP 90-beta	HSP90AB1;Hsp90ab1	4	43	22	58.1	83263	724	0	13596	13452	42579	291	11759	13888	46331	291	0.94473	10246	33355	291
P08240;Q9DBG7	P08240;Q9DBG7	Signal recognition particle receptor subunit alpha	SRPR;Srpr	2	18	18	31.2	69.81	638	1.49E-71	0.64028	12536	78822	12	0.83031	13475	80362	12	13944	15001	42693	12
P08243;Q61024	P08243;Q61024	Asparagine synthetase [glutamine-hydrolyzing]	ASNS;Asns	2	12	12	27.8	64369	561	9.47E-40	0.48583	0.9458	45154	7	0.48059	0.78271	41264	7	0.8609	0.81431	26871	7
P08249	P08249	Malate dehydrogenase, mitochondrial	Mdh2	1	15	4	57.4	35611	338	3.01E-145	NaN	NaN	NaN	0	NaN	NaN	NaN	0	NaN	NaN	NaN	0
P08414;Q16566	P08414;Q16566	Calcium/calmodulin-dependent protein kinase type IV	Camk4;CAMK4	2	1	1	4.1	52627	469	1.80E-06	NaN	NaN	NaN	1	NaN	NaN	NaN	1	NaN	NaN	NaN	1
P08473;Q61391	P08473;Q61391	Neprilysin	MME;Mme	2	31	31	46.4	85513	750	3.67E-131	0.46315	0.60532	29416	34	0.47731	0.57153	36169	34	10009	0.95798	38893	34
P08551	P08551	Neurofilament light polypeptide	Nefl	1	9	1	18	61508	543	7.46E-45	NaN	NaN	NaN	0	NaN	NaN	NaN	0	NaN	NaN	NaN	0
P08559;P35486	P08559;P35486	Pyruvate dehydrogenase E1 component subunit alpha, somatic form, mitochondrial	PDHA1;Pdha1	2	16	15	34.6	43295	390	5.82E-53	0.49163	0.94825	28766	21	0.64259	0.96545	31336	21	11535	11806	27535	21
P08574	P08574	Cytochrome c1, heme protein, mitochondrial	CYC1	1	6	4	24.3	35422	325	2.27E-69	15454	14738	34.56	13	14313	15283	32839	13	11442	12126	28.66	13
P08579;Q9CQI7	P08579;Q9CQI7	U2 small nuclear ribonucleoprotein B	SNRPB2;Snrpb2	2	8	5	36	25486	225	6.69E-28	0.68112	0.83691	27988	2	0.5182	0.69845	5798	2	0.88922	10648	11792	2
P08581;P16056	P08581	Hepatocyte growth factor receptor	MET	2	8	8	7.7	155.54	1390	1.03E-20	0.76252	1306	43777	4	0.57234	0.85391	126.75	4	0.73437	0.73722	128.8	4
P08582;Q9R0R1	P08582	Melanotransferrin	MFI2	2	16	16	34.7	80214	738	2.29E-51	0.84531	0.85836	57835	9	0.65147	0.97424	34637	9	11403	12846	42608	9
P08607	P08607	C4b-binding protein	C4bpa	1	4	4	11.5	51523	469	5.53E-13	NaN	NaN	NaN	0	NaN	NaN	NaN	0	NaN	NaN	NaN	0
P08621;Q62376	P08621;Q62376	U1 small nuclear ribonucleoprotein 70 kDa	SNRNP70;Snrnp70	2	14	14	33.9	51556	437	8.38E-79	0.50852	0.70487	57626	21	0.53388	0.8207	54444	21	10171	10881	12421	21
P08651	P08651	Nuclear factor 1 C-type	NFIC	1	1	1	2.2	55674	508	0.0015499	NaN	NaN	NaN	1	NaN	NaN	NaN	1	NaN	NaN	NaN	1
P08670;P03995;P14136;Q9DCV7;CON__Q9DCV7;P08729;CON__Q3KNV1;CON__P08729;P05787;CON__P05787;P11679;Q9NSB2;CON__Q9NSB2;CON__Q6ISB0;Q9ERE2;CON__H-INV:HIT000292931;CON__Q61726;P97861;O43790;CON__O43790;P78385;CON__Q6NT21;CON__P78385;Q6IMF0;Q14533;CON__Q14533;Q9Z2T6;P78386;CON__P78386;Q8N1N4;CON__Q8N1N4-2;CON__Q7RTT2;P07744;CON__P07744;Q8VED5;CON__Q8VED5;P48668;P02538;CON__P48668;CON__P04259;CON__P0253…	P08670	Vimentin	VIM	45	57	13	82.4	53651	466	0	0.79511	0.99153	32706	501	0.65903	0.82688	46909	500	0.82789	0.88456	35747	501
P63276;P0CW22;P08708	P63276;P0CW22;P08708	40S ribosomal protein S17;40S ribosomal protein S17-like	Rps17;RPS17L;RPS17	3	7	7	57	15524	135	1.30E-71	0.73906	0.91085	76274	21	0.69311	0.76105	89664	21	0.88505	0.93822	32414	21
P08754;Q9DC51;P20612;P11488;Q3V3I2;P50149;P19087;A8MTJ3	P08754;Q9DC51	Guanine nucleotide-binding protein G(k) subunit alpha	GNAI3;Gnai3	8	11	6	40.4	40532	354	6.51E-49	0.57459	0.9705	48994	6	0.53194	0.85006	37652	6	10173	10324	89575	6
P08758	P08758	Annexin A5	ANXA5	1	25	12	77.8	35936	320	3.57E-222	10357	22331	61969	105	14211	24322	88064	105	11332	11895	41385	105
P24928;P08775	P24928;P08775	DNA-directed RNA polymerase II subunit RPB1	POLR2A;Polr2a	2	28	28	17.9	217.17	1970	7.21E-110	0.40001	0.69511	28542	20	0.46563	0.58928	37.31	20	0.94699	0.97706	34481	20
P14206;P08865	P14206;P08865	40S ribosomal protein SA	Rpsa;RPSA	2	17	17	64.1	32838	295	8.01E-151	0.93577	10634	30037	56	0.80932	0.97761	32112	56	0.88854	0.96816	21.51	56
P08905;P17897	P08905	Lysozyme C-2	Lyz2	2	4	4	35.8	16689	148	1.74E-25	NaN	NaN	NaN	0	NaN	NaN	NaN	0	NaN	NaN	NaN	0
P08962	P08962	CD63 antigen	CD63	1	3	3	12.6	25636	238	1.86E-15	0.20432	0.25371	18383	7	0.20978	0.26954	17065	7	0.98272	10713	25651	7
P09001	P09001	39S ribosomal protein L3, mitochondrial	MRPL3	1	7	4	19.3	38632	348	1.19E-15	0.61741	0.546	20258	4	0.53641	0.56503	93473	4	0.83226	0.97264	12912	4
P09012;Q62189	P09012;Q62189	U1 small nuclear ribonucleoprotein A	SNRPA;Snrpa	2	9	6	33.3	31279	282	2.28E-36	0.58182	0.66067	39072	19	0.46325	0.603	56073	19	0.69731	0.80657	56128	19
P09055	P09055	Integrin beta-1	Itgb1	1	12	3	16	88231	798	1.77E-60	NaN	NaN	NaN	0	NaN	NaN	NaN	0	NaN	NaN	NaN	0
P09103	P09103	Protein disulfide-isomerase	P4hb	1	30	6	59.1	57058	509	7.66E-156	NaN	NaN	NaN	0	NaN	NaN	NaN	0	NaN	NaN	NaN	0
P09104;P17183	P09104;P17183	Gamma-enolase	ENO2;Eno2	2	21	15	67.5	47268	434	3.04E-166	21133	39516	33.01	33	13674	26473	33581	33	0.66212	0.55551	40347	33
P09110	P09110	3-ketoacyl-CoA thiolase, peroxisomal	ACAA1	1	11	9	49.3	44292	424	4.21E-51	1097	12082	27748	10	0.95237	1152	26769	10	0.95158	10427	33472	10
P09132;Q9D7A6	P09132	Signal recognition particle 19 kDa protein	SRP19	2	4	4	36.1	16156	144	6.17E-31	0.42783	0.95	11691	5	0.59465	0.98875	79605	5	12635	11032	11493	5
P09211	P09211	Glutathione S-transferase P	GSTP1	1	15	14	71	23356	210	3.86E-298	2.88	33083	40304	112	25181	31778	56158	112	0.86997	10032	37051	112
Q62241;P09234	Q62241;P09234	U1 small nuclear ribonucleoprotein C	Snrpc;SNRPC	2	3	3	24.5	17364	159	1.90E-13	0.75827	0.7197	10966	6	0.68475	0.72086	17544	6	0.85453	0.97167	20975	6
P09382	P09382	Galectin-1	LGALS1	1	8	6	68.9	14716	135	6.94E-88	15469	19793	36384	45	15061	19836	45669	45	0.82928	0.92244	34741	45
P09405	P09405	Nucleolin	Ncl	1	19	6	26.6	76722	707	1.98E-123	NaN	NaN	NaN	0	NaN	NaN	NaN	0	NaN	NaN	NaN	0
P09411	P09411	Phosphoglycerate kinase 1	Pgk1	1	22	6	64.7	44.55	417	1.30E-218	NaN	NaN	NaN	0	NaN	NaN	NaN	0	NaN	NaN	NaN	0
P09417;Q8BVI4	P09417;Q8BVI4	Dihydropteridine reductase	QDPR;Qdpr	2	10	10	57.4	25789	244	2.99E-104	0.70117	15942	29383	13	0.87691	16039	37693	13	1137	1.03	17454	13
P63158;P09429;B2RPK0	P63158;P09429;B2RPK0	High mobility group protein B1;Putative high mobility group protein B1-like 1	Hmgb1;HMGB1;HMGB1P1	3	12	9	47.4	24893	215	4.28E-71	19748	1494	46745	32	15953	15319	54926	32	0.72863	0.81931	39148	32
P09470	P09470	Angiotensin-converting enzyme;Angiotensin-converting enzyme, soluble form	Ace	1	3	3	2.2	150.92	1312	5.96E-06	NaN	NaN	NaN	0	NaN	NaN	NaN	0	NaN	NaN	NaN	0
P09471;P18872	P09471;P18872	Guanine nucleotide-binding protein G(o) subunit alpha	GNAO1;Gnao1	2	5	3	19.8	40.05	354	1.61E-22	NaN	NaN	NaN	0	NaN	NaN	NaN	0	NaN	NaN	NaN	0
P09486	P09486	SPARC	SPARC	1	8	4	31.7	34632	303	2.44E-45	0.52622	0.58706	32327	13	0.55898	0.58235	27365	13	0.95418	1082	34607	13
Q6IRU5;P09497	Q6IRU5;P09497	Clathrin light chain B	Cltb;CLTB	2	4	4	16.6	25171	229	7.67E-15	10241	10043	21541	5	10542	0.96949	28665	5	10292	11846	17048	5
P09525	P09525	Annexin A4	ANXA4	1	15	10	52	35882	319	5.45E-92	14689	29236	58227	16	11648	2027	75765	16	0.93089	0.94496	32608	16
P09543	P09543	2,3-cyclic-nucleotide 3-phosphodiesterase	CNP	1	18	12	43.2	47578	421	6.62E-71	0.6442	0.72943	28155	30	0.64212	0.90075	24642	30	10411	10731	46784	30
P09601	P09601	Heme oxygenase 1	HMOX1	1	5	4	27.4	32818	288	8.04E-15	0.52793	0.48907	0.038237	2	0.76703	0.73788	48.66	2	14539	15519	58687	2
P09622	P09622	Dihydrolipoyl dehydrogenase, mitochondrial	DLD	1	14	9	31.4	54177	509	1.43E-92	0.69876	0.93897	62833	30	0.75001	0.92197	81146	30	0.99915	10868	54864	30
P09651	P09651	Heterogeneous nuclear ribonucleoprotein A1	HNRNPA1	1	15	1	51.1	38746	372	8.48E-105	0.61725	0.69549	27667	58	0.50363	0.60943	42504	58	0.81622	0.93792	44736	58
P09661;P57784	P09661;P57784	U2 small nuclear ribonucleoprotein A	SNRPA1;Snrpa1	2	12	12	45.1	28415	255	3.87E-72	0.61981	0.65973	28.83	20	0.56779	0.6991	22.53	20	0.97713	10465	30206	20
P09668	P09668	Pro-cathepsin H;Cathepsin H mini chain;Cathepsin H;Cathepsin H heavy chain;Cathepsin H light chain	CTSH	1	2	2	5.4	37393	335	1.95E-05	NaN	NaN	NaN	1	NaN	NaN	NaN	1	NaN	NaN	NaN	1
P09669	P09669	Cytochrome c oxidase subunit 6C	COX6C	1	3	2	29.3	87813	75	1.93E-07	0.88357	10978	39.92	4	11062	15552	27.29	4	12885	12424	25322	4
P09671	P09671	Superoxide dismutase [Mn], mitochondrial	Sod2	1	5	1	20.3	24603	222	3.84E-20	NaN	NaN	NaN	0	NaN	NaN	NaN	0	NaN	NaN	NaN	0
P09813	P09813	Apolipoprotein A-II	Apoa2	1	2	2	28.4	11309	102	4.81E-08	NaN	NaN	NaN	1	NaN	NaN	NaN	1	NaN	NaN	NaN	1
P09874;P11103	P09874;P11103	Poly [ADP-ribose] polymerase 1	PARP1;Parp1	2	42	42	45.6	113.08	1014	3.99E-238	0.73172	11193	40323	73	0.87818	1.08	42957	73	10437	10997	22112	73
P09884;P33609	P09884	DNA polymerase alpha catalytic subunit	POLA1	2	11	11	9.4	165.91	1462	2.33E-38	0.48932	0.68684	36007	8	0.47299	0.70391	52998	8	0.80291	0.92222	28936	8
P09914;Q5T764	P09914	Interferon-induced protein with tetratricopeptide repeats 1	IFIT1	2	11	10	27.6	55.36	478	5.11E-36	NaN	NaN	NaN	0	NaN	NaN	NaN	0	NaN	NaN	NaN	0
P09960	P09960	Leukotriene A-4 hydrolase	LTA4H	1	27	18	45.8	69284	611	2.71E-240	0.73736	13967	33364	51	0.80757	12849	33612	51	0.92166	0.94732	22582	51
P09972;P05063;Q91Y97;P05062	P09972;P05063	Fructose-bisphosphate aldolase C	ALDOC;Aldoc	4	18	12	59.3	39455	364	2.67E-132	28549	27334	47746	25	24316	27408	62927	25	0.89462	0.94788	22.46	25
Q71UI9;Q3THW5;P0C0S6;P0C0S5	Q71UI9;Q3THW5;P0C0S6;P0C0S5	Histone H2A.V;Histone H2A.Z	H2AFV;H2afv;H2afz;H2AFZ	4	3	1	20.3	13509	128	2.56E-15	NaN	NaN	NaN	0	NaN	NaN	NaN	0	NaN	NaN	NaN	0
Q9BZD3;P0CAP2	Q9BZD3;P0CAP2	Putative GRINL1B complex locus protein 2;DNA-directed RNA polymerase II subunit GRINL1A	GCOM2;POLR2M	2	1	1	8.2	41712	368	8.84E-06	NaN	NaN	NaN	0	NaN	NaN	NaN	0	NaN	NaN	NaN	0
Q9BTY7;P0CB43;Q8C3I8	Q9BTY7;P0CB43	Protein FAM203A;Protein FAM203B	FAM203A;FAM203B	3	5	5	12.6	42129	390	1.48E-30	0.69795	15931	32.77	3	0.56825	10205	26574	3	0.51976	0.50027	43585	3
P0CG30;P0CG29;P30711;A8MPT4;Q61133	P0CG30;P0CG29	Glutathione S-transferase theta-2B;Glutathione S-transferase theta-2	GSTT2B;GSTT2	5	7	7	29.5	27507	244	8.14E-23	14965	17804	74634	4	18351	22207	64.3	4	10577	10948	21.91	4
P0CW02	P0CW02	Lymphocyte antigen 6C1	Ly6c1	1	1	1	13.7	14192	131	0.0014979	NaN	NaN	NaN	0	NaN	NaN	NaN	0	NaN	NaN	NaN	0
P0CW20;P0CW19	P0CW20;P0CW19	LIM and senescent cell antigen-like-containing domain protein 3-like;LIM and senescent cell antigen-like-containing domain protein 3	LIMS3L;LIMS3	2	3	3	37.6	13251	117	3.28E-09	2551	20582	40042	2	25972	21887	24212	2	15719	16817	77386	2
P0DJD0;P0DJD1	P0DJD0;P0DJD1	RANBP2-like and GRIP domain-containing protein 1;RANBP2-like and GRIP domain-containing protein 2	RGPD1;RGPD2	2	18	1	13.2	196.66	1748	5.33E-49	NaN	NaN	NaN	0	NaN	NaN	NaN	0	NaN	NaN	NaN	0
P10107	P10107	Annexin A1	Anxa1	1	21	19	65.9	38734	346	1.36E-150	21988	32321	0.48001	2	1972	30301	15272	2	0.8881	0.94145	13.61	2
P10109;P46656	P10109	Adrenodoxin, mitochondrial	FDX1	2	5	5	29.9	19393	184	7.57E-11	NaN	NaN	NaN	1	NaN	NaN	NaN	1	NaN	NaN	NaN	1
P10126	P10126	Elongation factor 1-alpha 1	Eef1a1	1	20	1	39.6	50113	462	2.70E-161	NaN	NaN	NaN	0	NaN	NaN	NaN	0	NaN	NaN	NaN	0
P10155;O08848	P10155	60 kDa SS-A/Ro ribonucleoprotein	TROVE2	2	7	7	16	60.67	538	1.95E-39	11472	10509	26683	7	11962	11793	40492	7	0.86894	10544	34483	7
P10253;P70699	P10253	Lysosomal alpha-glucosidase;76 kDa lysosomal alpha-glucosidase;70 kDa lysosomal alpha-glucosidase	GAA	2	4	4	5.4	105.32	952	3.67E-11	0.9279	12459	24309	2	0.52619	0.74737	0.18952	2	0.56545	0.61194	34834	2
P10400	P10400	Retrovirus-related Pol polyprotein;Reverse transcriptase;Endonuclease	Pol	1	2	2	19.2	13302	120	1.17E-06	NaN	NaN	NaN	0	NaN	NaN	NaN	0	NaN	NaN	NaN	0
P10404	P10404	MLV-related proviral Env polyprotein;Surface protein;Transmembrane protein		1	7	4	9.2	69612	641	6.86E-20	0.33032	0.34619	28205	9	0.21212	0.37959	77512	9	0.57048	0.56508	63499	9
P10412;P15864;P43274;P43277;P16402;P43275;P22492;Q07133;Q02539	P10412;P15864;P43274;P43277;P16402;P43275	Histone H1.4;Histone H1.2;Histone H1.3;Histone H1.1	HIST1H1E;Hist1h1c;Hist1h1e;Hist1h1d;HIST1H1D;Hist1h1a	9	6	1	23.3	21865	219	2.26E-30	NaN	NaN	NaN	0	NaN	NaN	NaN	0	NaN	NaN	NaN	0
P10451;CON__P31096	P10451	Osteopontin	SPP1	2	4	4	24.5	35422	314	2.79E-14	17273	26463	45625	3	17157	32753	18159	3	11945	12054	26924	3
P10493;P14543	P10493	Nidogen-1	Nid1	2	48	47	45	136.54	1245	0	19067	18277	386.83	3	23655	25792	255.59	3	12787	14738	152.88	3
P10515	P10515	Dihydrolipoyllysine-residue acetyltransferase component of pyruvate dehydrogenase complex, mitochondrial	DLAT	1	13	6	26.1	68996	647	2.86E-69	0.50588	0.76373	28376	17	0.48874	0.7003	40214	17	0.94324	0.86951	39.94	17
P10518	P10518	Delta-aminolevulinic acid dehydratase	Alad	1	3	1	14.8	36023	330	1.06E-13	NaN	NaN	NaN	0	NaN	NaN	NaN	0	NaN	NaN	NaN	0
P43136;P10588;Q505F1	P43136;P10588	Nuclear receptor subfamily 2 group F member 6	Nr2f6;NR2F6	3	3	2	10.8	41967	390	1.30E-10	NaN	NaN	NaN	0	NaN	NaN	NaN	0	NaN	NaN	NaN	0
P10599	P10599	Thioredoxin	TXN	1	5	4	41	11737	105	7.08E-24	23585	2.69	50497	31	18091	21883	46165	31	0.80227	0.93944	17597	31
P10605	P10605	Cathepsin B;Cathepsin B light chain;Cathepsin B heavy chain	Ctsb	1	9	8	31	37279	339	1.65E-107	NaN	NaN	NaN	0	NaN	NaN	NaN	0	NaN	NaN	NaN	0
P10606	P10606	Cytochrome c oxidase subunit 5B, mitochondrial	COX5B	1	6	5	34.9	13696	129	1.54E-36	0.76437	12919	21.55	16	10045	16339	24785	16	12168	12533	28245	16
P10619	P10619	Lysosomal protective protein;Lysosomal protective protein 32 kDa chain;Lysosomal protective protein 20 kDa chain	CTSA	1	11	10	26.5	54465	480	5.83E-58	1031	10074	27295	14	0.89941	0.88598	42028	14	0.89469	0.97576	19859	14
P10620	P10620	Microsomal glutathione S-transferase 1	MGST1	1	2	2	11.6	17598	155	3.03E-05	NaN	NaN	NaN	0	NaN	NaN	NaN	0	NaN	NaN	NaN	0
Q14240;P10630	Q14240;P10630	Eukaryotic initiation factor 4A-II	EIF4A2;Eif4a2	2	24	8	52.6	46402	407	3.18E-127	0.94471	0.91895	29167	25	0.6726	0.81944	36905	25	0.88397	0.86486	22039	25
P10639	P10639	Thioredoxin	Txn	1	4	3	40	11675	105	4.68E-18	1147	22499	21198	2	0.8906	16383	52671	2	0.90504	0.84688	34243	2
P10644;Q9DBC7	P10644;Q9DBC7	cAMP-dependent protein kinase type I-alpha regulatory subunit;cAMP-dependent protein kinase type I-alpha regulatory subunit, N-terminally processed	PRKAR1A;Prkar1a	2	19	15	50.7	42981	381	3.80E-78	11364	11861	59553	33	10731	10808	69899	33	0.86217	0.91209	33929	33
P10649;Q80W21;O35660	P10649	Glutathione S-transferase Mu 1	Gstm1	3	6	2	28	25.97	218	3.60E-17	NaN	NaN	NaN	0	NaN	NaN	NaN	0	NaN	NaN	NaN	0
P10711	P10711	Transcription elongation factor A protein 1	Tcea1	1	9	2	34.2	33.88	301	3.10E-31	0.45082	10016	25217	8	0.52655	0.91536	24084	8	0.98031	0.89367	93836	8
P10721;P05532	P10721	Mast/stem cell growth factor receptor Kit	KIT	2	13	13	18.3	109.86	976	5.18E-53	0.37227	0.34462	45722	10	0.27933	0.41371	36.19	10	0.86947	10294	21901	10
P10768	P10768	S-formylglutathione hydrolase	ESD	1	9	6	34.4	31462	282	1.77E-59	0.9737	17815	27.06	18	10481	16801	28.44	17	0.9055	0.92077	10917	17
P10809	P10809	60 kDa heat shock protein, mitochondrial	HSPD1	1	36	8	64.9	61054	573	0	0.54871	0.67986	34393	212	0.61311	0.77071	39.3	212	11012	12545	37917	212
P10833;P10301	P10833;P10301	Ras-related protein R-Ras	Rras;RRAS	2	3	2	22	23764	218	9.73E-09	NaN	NaN	NaN	0	NaN	NaN	NaN	0	NaN	NaN	NaN	0
P10852	P10852	4F2 cell-surface antigen heavy chain	Slc3a2	1	5	4	9.7	58336	526	1.15E-17	NaN	NaN	NaN	0	NaN	NaN	NaN	0	NaN	NaN	NaN	0
P10923	P10923	Osteopontin	Spp1	1	3	3	18.7	32459	294	3.68E-24	NaN	NaN	NaN	0	NaN	NaN	NaN	0	NaN	NaN	NaN	0
P11021	P11021	78 kDa glucose-regulated protein	HSPA5	1	34	2	50	72332	654	0	0.56829	0.73191	47668	165	0.59848	0.80416	45138	165	10732	11478	38281	165
P11047	P11047	Laminin subunit gamma-1	LAMC1	1	45	15	32.3	177.6	1609	0	22946	28271	286.52	4	26145	3389	198.59	4	12116	10387	78808	5
P11087;P02452;CON__Q862S4	P11087	Collagen alpha-1(I) chain	Col1a1	3	10	10	8.9	138.03	1453	1.48E-61	NaN	NaN	NaN	0	NaN	NaN	NaN	0	NaN	NaN	NaN	0
P11117;P24638	P11117;P24638	Lysosomal acid phosphatase	ACP2;Acp2	2	4	4	10.4	48344	423	3.77E-11	0.81395	1.01	46562	4	0.61796	0.74352	92709	4	0.91781	0.96613	91887	4
P11142	P11142	Heat shock cognate 71 kDa protein	HSPA8	1	37	1	56.5	70897	646	0	0.98731	10914	23436	286	0.83798	10435	30301	286	0.88005	0.98793	25492	286
P11166;P17809	P11166;P17809	Solute carrier family 2, facilitated glucose transporter member 1	SLC2A1;Slc2a1	2	7	7	14	54083	492	2.36E-40	11878	17749	74972	10	11182	15245	112.84	10	16123	18809	117.52	10
P11169;Q8TDB8	P11169;Q8TDB8	Solute carrier family 2, facilitated glucose transporter member 3;Solute carrier family 2, facilitated glucose transporter member 14	SLC2A3;SLC2A14	2	4	3	8.5	53924	496	6.58E-31	22689	2977	14527	2	11843	17557	201.18	2	0.52257	0.57201	212.38	2
P11171;P48193	P11171;P48193	Protein 4.1	EPB41;Epb41	2	11	9	17.1	97016	864	1.02E-46	0.51947	0.72936	42356	9	0.62805	0.76996	26358	9	12126	10548	25548	9
P11172;P13439	P11172	Uridine 5-monophosphate synthase;Orotate phosphoribosyltransferase;Orotidine 5-phosphate decarboxylase	UMPS	2	18	18	42.3	52221	480	1.35E-52	16081	15125	30402	17	17305	16196	38567	17	0.98447	10324	19688	17
P11177	P11177	Pyruvate dehydrogenase E1 component subunit beta, mitochondrial	PDHB	1	13	8	41.8	39233	359	6.10E-133	0.79012	0.88442	21998	36	0.7527	0.92051	38605	36	0.98983	1138	34713	35
P11182;P53395	P11182;P53395	Lipoamide acyltransferase component of branched-chain alpha-keto acid dehydrogenase complex, mitochondrial	DBT;Dbt	2	4	4	11	53486	482	3.47E-10	0.6564	0.92051	61917	4	0.60151	0.83754	14.02	4	0.82753	0.88765	72164	4
P11216	P11216	Glycogen phosphorylase, brain form	PYGB	1	24	9	31.8	96695	843	9.24E-80	10625	16807	51258	26	10057	16031	83419	26	0.81669	0.86945	63458	26
P11233;P63321	P11233;P63321	Ras-related protein Ral-A	RALA;Rala	2	7	5	28.2	23567	206	6.49E-29	0.51237	0.85863	25562	11	0.48306	0.71703	41986	11	0.9812	11028	50586	11
P11234;Q9JIW9	P11234;Q9JIW9	Ras-related protein Ral-B	RALB;Ralb	2	4	2	22.3	23408	206	2.41E-13	0.38235	0.8325	32.37	3	0.43905	0.78307	50635	3	11738	10421	24585	3
P11247;P05164	P11247;P05164	Myeloperoxidase;Myeloperoxidase light chain;Myeloperoxidase heavy chain;Myeloperoxidase;Myeloperoxidase;89 kDa myeloperoxidase;84 kDa myeloperoxidase;Myeloperoxidase light chain;Myeloperoxidase heavy chain	Mpo;MPO	2	6	6	12.3	81181	718	8.20E-20	NaN	NaN	NaN	0	NaN	NaN	NaN	0	NaN	NaN	NaN	0
P11276	P11276	Fibronectin;Anastellin	Fn1	1	60	39	35.6	272.53	2477	0	14343	22423	119.24	2	0.7879	11039	107.2	2	0.60181	0.60593	21723	2
P11279	P11279	Lysosome-associated membrane glycoprotein 1	LAMP1	1	9	7	22.5	44882	417	1.28E-80	0.39871	0.4706	106.02	19	0.37269	0.49494	96579	19	0.95694	10329	36718	19
P11310	P11310	Medium-chain specific acyl-CoA dehydrogenase, mitochondrial	ACADM	1	12	8	31.6	46588	421	2.85E-66	0.93372	10497	17909	22	0.64597	0.95847	46408	22	0.92975	0.96903	42238	22
P11352	P11352	Glutathione peroxidase 1	Gpx1	1	10	9	70.1	22347	201	2.29E-38	26513	55002	98178	2	13268	25724	113.72	2	0.63505	0.55732	29044	2
P11370	P11370	Retrovirus-related Env polyprotein from Fv-4 locus	Fv4	1	4	1	5.3	74452	679	7.86E-12	NaN	NaN	NaN	1	NaN	NaN	NaN	1	NaN	NaN	NaN	1
P11387;Q8R4U6;Q969P6	P11387	DNA topoisomerase 1	TOP1	3	19	5	27.3	90725	765	1.46E-81	0.82221	10244	47189	16	0.94732	10729	51113	15	11374	11597	38.25	16
P11388;Q01320	P11388;Q01320	DNA topoisomerase 2-alpha	TOP2A;Top2a	2	16	10	13.8	174.38	1531	5.28E-50	0.41604	0.54178	42403	6	0.39967	0.49339	38102	6	0.93443	0.90715	60018	6
P11413	P11413	Glucose-6-phosphate 1-dehydrogenase	G6PD	1	25	9	58.6	59256	515	2.33E-137	17679	18279	60067	81	12277	14408	56839	81	0.79651	0.87528	35702	81
P11438	P11438	Lysosome-associated membrane glycoprotein 1	Lamp1	1	3	1	7.6	43865	406	1.23E-13	NaN	NaN	NaN	0	NaN	NaN	NaN	0	NaN	NaN	NaN	0
P11441;P21126	P11441	Ubiquitin-like protein 4A	UBL4A	2	3	3	21	17776	157	2.24E-07	0.70562	0.70615	43752	3	0.58549	0.67582	45801	3	0.83941	0.94785	21088	3
P11498	P11498	Pyruvate carboxylase, mitochondrial	PC	1	26	8	32.1	129.63	1178	6.69E-102	10824	11913	74979	19	0.68591	0.87966	45147	19	0.78507	0.87895	42768	19
P11586	P11586	C-1-tetrahydrofolate synthase, cytoplasmic;Methylenetetrahydrofolate dehydrogenase;Methenyltetrahydrofolate cyclohydrolase;Formyltetrahydrofolate synthetase	MTHFD1	1	38	27	48.2	101.56	935	8.35E-186	12515	13701	32523	42	10958	14258	33334	42	0.92639	10237	27231	42
P11589;P04938;P11588;P02762;B5X0G2	P11589;P04938;P11588;P02762;B5X0G2	Major urinary protein 2;Major urinary proteins 11 and 8;Major urinary protein 1;Major urinary protein 6;Major urinary protein 17	Mup2;Mup8;Mup1;Mup6;Mup17	5	4	4	31.7	20663	180	2.52E-20	NaN	NaN	NaN	0	NaN	NaN	NaN	0	NaN	NaN	NaN	0
P11672	P11672	Neutrophil gelatinase-associated lipocalin	Lcn2	1	3	3	15.5	22875	200	2.17E-07	NaN	NaN	NaN	0	NaN	NaN	NaN	0	NaN	NaN	NaN	0
P11680	P11680	Properdin	Cfp	1	1	1	3	50327	464	5.24E-07	NaN	NaN	NaN	0	NaN	NaN	NaN	0	NaN	NaN	NaN	0
P11717	P11717	Cation-independent mannose-6-phosphate receptor	IGF2R	1	52	48	27.2	274.37	2491	1.18E-262	0.51688	0.58232	42144	53	0.46769	0.51764	40567	53	0.92304	10027	34272	53
P11766	P11766	Alcohol dehydrogenase class-3	ADH5	1	12	5	39.6	39724	374	1.88E-69	18497	16335	36441	24	15058	16724	45.12	24	0.8297	0.92052	31833	24
P11802;P30285	P11802	Cyclin-dependent kinase 4	CDK4	2	7	6	32	33729	303	3.60E-18	0.63347	0.87135	47315	8	0.65661	0.9176	80124	8	0.78445	0.91492	50817	8
P11835	P11835	Integrin beta-2	Itgb2	1	12	10	20.9	85025	771	2.61E-57	NaN	NaN	NaN	0	NaN	NaN	NaN	0	NaN	NaN	NaN	0
P11859	P11859	Angiotensinogen;Angiotensin-1;Angiotensin-2;Angiotensin-3;Angiotensin-4;Angiotensin 1-9;Angiotensin 1-7;Angiotensin 1-5;Angiotensin 1-4	Agt	1	3	3	8.6	51.99	477	6.61E-10	NaN	NaN	NaN	0	NaN	NaN	NaN	0	NaN	NaN	NaN	0
P11908;Q9CS42	P11908;Q9CS42	Ribose-phosphate pyrophosphokinase 2	PRPS2;Prps2	2	13	5	48.1	34769	318	1.77E-82	0.45343	0.90885	19.38	3	0.31072	0.5595	63793	3	0.85773	0.74547	52612	3
P11928	P11928	2-5-oligoadenylate synthase 1A	Oas1a	1	1	1	6.5	42428	367	2.31E-13	NaN	NaN	NaN	0	NaN	NaN	NaN	0	NaN	NaN	NaN	0
P11940;Q9H361	P11940	Polyadenylate-binding protein 1	PABPC1	2	25	1	41.8	70.67	636	5.91E-215	0.92648	10455	32428	109	0.76304	10001	40077	109	0.88014	0.94965	30597	109
P11983	P11983	T-complex protein 1 subunit alpha	Tcp1	1	22	1	46.4	60448	556	6.72E-123	NaN	NaN	NaN	0	NaN	NaN	NaN	0	NaN	NaN	NaN	0
P12004;P17918	P12004;P17918	Proliferating cell nuclear antigen	PCNA;Pcna	2	16	16	65.1	28768	261	2.89E-106	0.96477	0.97709	19407	51	0.71113	10312	21957	51	0.8796	10144	13282	50
P12081;Q61035;Q99KK9	P12081;Q61035	Histidine--tRNA ligase, cytoplasmic	HARS;Hars	3	17	13	33.4	57.41	509	3.93E-68	16514	16964	27874	18	15578	17045	38863	18	0.85507	0.92318	16326	18
P12109	P12109	Collagen alpha-1(VI) chain	COL6A1	1	4	2	5.8	108.53	1028	1.73E-10	NaN	NaN	NaN	0	NaN	NaN	NaN	0	NaN	NaN	NaN	0
P12111	P12111	Collagen alpha-3(VI) chain	COL6A3	1	9	9	3.1	343.67	3177	2.39E-16	NaN	NaN	NaN	0	NaN	NaN	NaN	0	NaN	NaN	NaN	0
P12235;Q9H0C2;Q3V132	P12235	ADP/ATP translocase 1	SLC25A4	3	19	4	58.4	33064	298	2.24E-91	0.65816	0.83196	43462	12	0.73055	0.79767	21724	12	10845	1099	24427	12
P12236	P12236	ADP/ATP translocase 3	SLC25A6	1	20	2	60.7	32866	298	8.05E-93	0.54355	0.65154	32619	89	0.59051	0.70907	33923	89	10359	11209	31163	89
P12246	P12246	Serum amyloid P-component	Apcs	1	5	5	26.3	26247	224	1.49E-30	NaN	NaN	NaN	0	NaN	NaN	NaN	0	NaN	NaN	NaN	0
P12265	P12265	Beta-glucuronidase	Gusb	1	3	2	5.1	74194	648	8.05E-08	NaN	NaN	NaN	0	NaN	NaN	NaN	0	NaN	NaN	NaN	0
P12268;P24547	P12268;P24547	Inosine-5-monophosphate dehydrogenase 2	IMPDH2;Impdh2	2	20	18	48.2	55804	514	8.03E-120	10499	10883	30838	43	0.98359	11689	50048	42	10165	1156	39384	43
P12270	P12270	Nucleoprotein TPR	TPR	1	68	68	36.4	267.29	2363	0	0.62713	0.80093	42222	78	0.56686	0.71176	35.11	77	0.89218	0.98568	31789	78
P12277	P12277	Creatine kinase B-type	CKB	1	5	1	21.8	42644	381	7.15E-46	NaN	NaN	NaN	0	NaN	NaN	NaN	0	NaN	NaN	NaN	0
P12382	P12382	6-phosphofructokinase, liver type	Pfkl	1	10	2	16.2	85359	780	5.13E-43	NaN	NaN	NaN	0	NaN	NaN	NaN	0	NaN	NaN	NaN	0
P12532;P30275	P12532;P30275	Creatine kinase U-type, mitochondrial	CKMT1A;Ckmt1	2	2	1	8.2	47036	417	1.02E-37	NaN	NaN	NaN	0	NaN	NaN	NaN	0	NaN	NaN	NaN	0
P12694	P12694	2-oxoisovalerate dehydrogenase subunit alpha, mitochondrial	BCKDHA	1	3	2	12.1	50.47	445	2.16E-08	0.58137	0.80872	17266	2	0.39745	0.5737	23034	2	0.7628	0.80726	33972	2
P12787	P12787	Cytochrome c oxidase subunit 5A, mitochondrial	Cox5a	1	3	1	22.6	16101	146	2.98E-09	NaN	NaN	NaN	0	NaN	NaN	NaN	0	NaN	NaN	NaN	0
P12814	P12814	Alpha-actinin-1	ACTN1	1	42	4	55.3	103.06	892	0	14496	13822	37483	60	10962	12637	42046	60	0.80935	0.93159	29414	60
P12830;P09803	P12830	Cadherin-1;E-Cad/CTF1;E-Cad/CTF2;E-Cad/CTF3	CDH1	2	7	6	12.2	97455	882	3.57E-26	15469	24832	22703	5	18838	23496	26613	5	12259	1261	23142	5
P12849	P12849	cAMP-dependent protein kinase type I-beta regulatory subunit	Prkar1b	1	6	0	19.4	43224	381	9.85E-18	NaN	NaN	NaN	1	NaN	NaN	NaN	1	NaN	NaN	NaN	1
P12882	P12882	Myosin-1	MYH1	1	64	0	32.7	223.14	1939	0	NaN	NaN	NaN	0	NaN	NaN	NaN	0	NaN	NaN	NaN	0
Q91Z83;P12883	Q91Z83;P12883	Myosin-7	Myh7;MYH7	2	24	0	11.8	222.88	1935	5.03E-292	NaN	NaN	NaN	0	NaN	NaN	NaN	0	NaN	NaN	NaN	0
P12955	P12955	Xaa-Pro dipeptidase	PEPD	1	12	8	30	54548	493	6.42E-89	0.96547	19553	32583	16	12557	16422	46322	16	0.88338	0.98776	30404	16
P12956;P23475	P12956	X-ray repair cross-complementing protein 6	XRCC6	2	33	33	53.9	69842	609	4.61E-297	0.85685	0.90166	25233	126	0.75246	0.87158	52437	125	0.90287	10329	46286	126
P62424;P12970	P62424;P12970	60S ribosomal protein L7a	RPL7A;Rpl7a	2	14	14	45.5	29995	266	4.94E-99	0.25726	0.40646	22459	24	0.17314	0.27509	34405	24	0.78413	0.72555	13221	24
P13010;P27641	P13010	X-ray repair cross-complementing protein 5	XRCC5	2	36	36	46.2	82704	732	0	0.68335	0.75517	38216	143	0.60862	0.80035	52.14	143	0.91986	10257	31986	142
P13020	P13020	Gelsolin	Gsn	1	18	8	31.2	85941	780	1.62E-140	NaN	NaN	NaN	0	NaN	NaN	NaN	0	NaN	NaN	NaN	0
P13051	P13051	Uracil-DNA glycosylase	UNG	1	2	2	11.5	34645	313	6.63E-06	0.79829	0.8649	15036	3	0.96869	0.9734	76678	3	11646	11444	18.54	3
P13056	P13056	Nuclear receptor subfamily 2 group C member 1	NR2C1	1	4	3	8.5	67314	603	1.35E-08	NaN	NaN	NaN	1	NaN	NaN	NaN	1	NaN	NaN	NaN	1
P13073	P13073	Cytochrome c oxidase subunit 4 isoform 1, mitochondrial	COX4I1	1	8	8	39.1	19576	169	6.29E-54	0.96313	10834	25178	32	12667	14314	20.39	32	12841	13888	20411	32
P13412;P48788	P13412;P48788	Troponin I, fast skeletal muscle	Tnni2;TNNI2	2	4	4	19.2	21357	182	7.89E-14	NaN	NaN	NaN	0	NaN	NaN	NaN	0	NaN	NaN	NaN	0
P13473	P13473	Lysosome-associated membrane glycoprotein 2	LAMP2	1	4	4	12.4	44.96	410	2.70E-18	0.23673	0.53646	61668	5	0.26838	0.43005	28992	5	0.94297	0.83103	34611	5
P13489	P13489	Ribonuclease inhibitor	RNH1	1	23	23	69	49973	461	6.20E-169	12242	12112	42143	22	11191	13278	47019	22	0.95642	10712	19802	22
P13541;A2AQP0;A7E2Y1	P13541	Myosin-3	Myh3	3	34	0	16.2	223.79	1940	3.10E-255	NaN	NaN	NaN	0	NaN	NaN	NaN	0	NaN	NaN	NaN	0
P13542	P13542	Myosin-8	Myh8	1	53	0	27.2	222.7	1937	0	NaN	NaN	NaN	0	NaN	NaN	NaN	0	NaN	NaN	NaN	0
P13634	P13634	Carbonic anhydrase 1	Ca1	1	3	3	13.4	28.33	261	4.53E-20	NaN	NaN	NaN	0	NaN	NaN	NaN	0	NaN	NaN	NaN	0
Q6PIC6;P13637	Q6PIC6;P13637	Sodium/potassium-transporting ATPase subunit alpha-3	Atp1a3;ATP1A3	2	17	1	19.3	111.69	1013	3.44E-152	NaN	NaN	NaN	0	NaN	NaN	NaN	0	NaN	NaN	NaN	0
P13639	P13639	Elongation factor 2	EEF2	1	52	4	51.7	95337	858	0	11581	12826	30074	257	0.96956	1249	43235	258	0.89387	0.98767	31.25	258
P13667	P13667	Protein disulfide-isomerase A4	PDIA4	1	45	23	62.2	72932	645	0	0.4461	0.55189	40689	87	0.43277	0.57719	38246	87	0.97858	10445	42334	87
P13674;Q60715	P13674;Q60715	Prolyl 4-hydroxylase subunit alpha-1	P4HA1;P4ha1	2	20	20	44.8	61049	534	9.09E-84	0.68931	10586	48793	17	0.70644	0.96087	71863	17	10587	11441	73686	17
P13686;Q05117	P13686;Q05117	Tartrate-resistant acid phosphatase type 5	ACP5;Acp5	2	4	4	15.7	36598	325	2.12E-10	0.84793	10544	30635	6	0.61103	0.63379	23762	6	0.70356	0.73108	36637	6
P13688;P40199;P31997;P06731	P13688	Carcinoembryonic antigen-related cell adhesion molecule 1	CEACAM1	4	5	5	12	57.56	526	8.34E-16	24029	19532	70967	7	22367	22177	64998	7	0.93825	11172	12722	7
P13693;Q56UQ5;Q9HAU6	P13693	Translationally-controlled tumor protein	TPT1	3	8	4	44.2	19595	172	1.23E-66	14131	13204	29371	40	10925	11411	53665	40	0.83333	0.93369	37142	40
P13707;P21695	P13707;P21695	Glycerol-3-phosphate dehydrogenase [NAD(+)], cytoplasmic	Gpd1;GPD1	2	9	8	33	37572	349	3.16E-34	NaN	NaN	NaN	0	NaN	NaN	NaN	0	NaN	NaN	NaN	0
P13716	P13716	Delta-aminolevulinic acid dehydratase	ALAD	1	5	3	24.2	36294	330	7.22E-12	3399	46976	85101	2	33742	47412	71965	2	0.99496	0.97969	92817	2
P13797	P13797	Plastin-3	PLS3	1	29	2	54.4	70.81	630	4.33E-252	11563	13896	25.65	35	10437	13774	34826	35	0.85173	0.94745	28214	35
P13798	P13798	Acylamino-acid-releasing enzyme	APEH	1	16	9	24.9	81224	732	1.47E-75	0.87201	18486	57445	19	10767	18055	68266	18	0.94858	10082	35799	19
P13804	P13804	Electron transfer flavoprotein subunit alpha, mitochondrial	ETFA	1	12	6	50.2	35079	333	1.55E-94	0.57053	0.73124	33.7	37	0.54112	0.71892	24933	37	0.90164	0.98102	25.86	37
P13807;Q9Z1E4;P54840;Q8VCB3	P13807;Q9Z1E4	Glycogen [starch] synthase, muscle	GYS1;Gys1	4	12	12	22	83785	737	8.81E-50	10662	12798	32122	6	10344	14735	12634	6	0.89196	10154	31742	6
P13861;P12367;P31324	P13861;P12367	cAMP-dependent protein kinase type II-alpha regulatory subunit	PRKAR2A;Prkar2a	3	9	7	30.4	45518	404	1.06E-52	15819	11385	17842	5	15442	12732	37226	5	10032	10244	19843	5
P13984;Q8R0A0	P13984;Q8R0A0	General transcription factor IIF subunit 2	GTF2F2;Gtf2f2	2	11	11	51.4	28.38	249	1.40E-33	0.4512	0.94972	28441	10	0.50857	0.91328	29187	10	0.90654	0.89697	16412	10
P13987	P13987	CD59 glycoprotein	CD59	1	4	4	25	14177	128	7.70E-33	0.89115	0.74752	22571	18	0.81848	0.83944	47754	18	0.89267	0.95964	36.08	18
P13994	P13994	Coiled-coil domain-containing protein 130	CCDC130	1	2	2	7.3	44802	396	1.12E-05	0.39272	0.55128	10918	2	0.26091	0.35773	35963	2	0.52637	0.54106	62058	2
P13995;P18155	P13995;P18155	Bifunctional methylenetetrahydrofolate dehydrogenase/cyclohydrolase, mitochondrial;NAD-dependent methylenetetrahydrofolate dehydrogenase;Methenyltetrahydrofolate cyclohydrolase	MTHFD2;Mthfd2	2	8	8	30.6	37895	350	2.99E-46	0.26404	0.24565	51891	7	0.33557	0.27783	43186	7	11106	10849	15817	7
P14069;P06703	P14069;P06703	Protein S100-A6	S100a6;S100A6	2	4	4	27	10051	89	7.28E-10	44883	45667	124.11	2	53463	66314	203.7	2	0.68344	0.77955	16025	2
P14106	P14106	Complement C1q subcomponent subunit B	C1qb	1	4	4	19	26717	253	2.03E-12	NaN	NaN	NaN	0	NaN	NaN	NaN	0	NaN	NaN	NaN	0
P14115	P14115	60S ribosomal protein L27a	Rpl27a	1	5	1	28.4	16605	148	1.74E-22	NaN	NaN	NaN	0	NaN	NaN	NaN	0	NaN	NaN	NaN	0
P62249;P14131	P62249;P14131	40S ribosomal protein S16	RPS16;Rps16	2	9	9	46.6	16445	146	1.08E-33	0.55669	0.94001	31762	30	0.59544	0.91348	34165	30	10708	10077	32.08	30
P14152	P14152	Malate dehydrogenase, cytoplasmic	Mdh1	1	9	2	26	36511	334	1.19E-76	NaN	NaN	NaN	0	NaN	NaN	NaN	0	NaN	NaN	NaN	0
P14174	P14174	Macrophage migration inhibitory factor	MIF	1	2	2	11.3	12476	115	3.22E-07	2804	29683	20.53	11	2599	29584	32487	11	0.9108	0.95653	11887	11
P14209	P14209	CD99 antigen	CD99	1	2	2	13	18848	185	2.00E-07	0.21929	0.2956	12947	4	0.17868	0.25029	26.17	4	0.91617	0.86548	28134	4
P14211	P14211	Calreticulin	Calr	1	22	7	53.8	47994	416	3.47E-149	NaN	NaN	NaN	1	NaN	NaN	NaN	1	NaN	NaN	NaN	1
P14231	P14231	Sodium/potassium-transporting ATPase subunit beta-2	Atp1b2	1	1	1	9.3	33344	290	0.00043627	NaN	NaN	NaN	0	NaN	NaN	NaN	0	NaN	NaN	NaN	0
P14314	P14314	Glucosidase 2 subunit beta	PRKCSH	1	20	18	47.9	59425	528	2.15E-198	0.5263	0.64468	34751	50	0.58193	0.70463	33763	50	1108	12109	23988	50
P23906;P14316	P23906;P14316	Interferon regulatory factor 2	Irf2;IRF2	2	2	2	8.3	39452	349	2.66E-06	10044	0.73916	34409	3	0.89746	0.74105	94265	3	0.86995	0.90435	30.21	3
P14324	P14324	Farnesyl pyrophosphate synthase	FDPS	1	7	5	16.5	48275	419	4.46E-68	19264	20153	53226	37	17122	18334	36876	37	0.88527	0.96085	37217	37
Q62158;P14373	Q62158;P14373	Zinc finger protein RFP	Trim27;TRIM27	2	3	3	8	58512	513	2.47E-10	0.69329	0.5752	28603	5	0.70981	0.73518	20477	5	0.86024	0.96544	19221	5
P14406	P14406	Cytochrome c oxidase subunit 7A2, mitochondrial	COX7A2	1	2	2	27.7	93959	83	2.70E-16	10555	17333	12818	2	11109	16271	29511	2	11308	11568	23228	2
P14550	P14550	Alcohol dehydrogenase [NADP(+)]	AKR1A1	1	12	9	45.8	36573	325	4.71E-45	20967	31291	50461	9	2736	31134	78252	9	0.87831	0.98306	47222	9
P61011;P14576	P61011;P14576	Signal recognition particle 54 kDa protein	SRP54;Srp54	2	21	21	48	55704	504	1.79E-93	0.35402	0.75337	38683	6	0.28623	0.53039	67574	6	0.75642	0.72679	64922	6
P14618	P14618	Pyruvate kinase isozymes M1/M2	PKM	1	35	8	70.1	57936	531	0	21774	21537	31617	198	17742	19554	39264	198	0.83805	0.95202	24106	198
P14625;Q58FF3	P14625	Endoplasmin	HSP90B1	2	47	7	53.3	92468	803	0	0.52519	0.63704	41907	209	0.61226	0.76467	40863	209	11409	12465	31811	208
P14635	P14635	G2/mitotic-specific cyclin-B1	CCNB1	1	3	3	9.5	48337	433	2.40E-08	0.8133	16262	10536	2	0.65995	12078	55052	2	0.8841	0.74559	57675	2
P27048;P63163;P63162;P14678	P27048;P63163;P63162;P14678	Small nuclear ribonucleoprotein-associated protein B;Small nuclear ribonucleoprotein-associated protein N;Small nuclear ribonucleoprotein-associated proteins B and B	Snrpb;Snrpn;SNRPN;SNRPB	4	8	8	26	23656	231	1.49E-23	0.61513	0.68755	38657	33	0.5064	0.66644	58966	33	0.92271	0.98145	45362	33
P14679;P11344	P14679	Tyrosinase	TYR	2	13	13	33.1	60393	529	3.75E-70	0.49326	0.53888	15307	18	0.48281	0.6368	15803	18	10896	11264	18751	18
P14733	P14733	Lamin-B1	Lmnb1	1	37	5	58	66785	588	3.44E-182	NaN	NaN	NaN	0	NaN	NaN	NaN	0	NaN	NaN	NaN	0
P14735;Q9JHR7	P14735;Q9JHR7	Insulin-degrading enzyme	IDE;Ide	2	19	19	22.2	117.97	1019	2.30E-59	24856	20804	31142	16	19384	17791	34241	16	0.81742	0.89751	17254	16
P14824	P14824	Annexin A6	Anxa6	1	33	13	49.8	75884	673	9.80E-178	NaN	NaN	NaN	0	NaN	NaN	NaN	0	NaN	NaN	NaN	0
P14847	P14847	C-reactive protein	Crp	1	1	1	6.2	25.36	225	5.14E-05	NaN	NaN	NaN	0	NaN	NaN	NaN	0	NaN	NaN	NaN	0
P14854	P14854	Cytochrome c oxidase subunit 6B1	COX6B1	1	7	5	75.6	10192	86	3.59E-86	11824	14048	30317	28	11999	1507	37799	28	10469	11131	21416	28
P14859;P25425	P14859	POU domain, class 2, transcription factor 1	POU2F1	2	3	3	9.3	76471	743	5.12E-33	0.88767	0.97218	15824	2	0.6278	0.85069	13254	2	0.77539	0.93046	2705	2
P14866;Q8R081	P14866;Q8R081	Heterogeneous nuclear ribonucleoprotein L	HNRNPL;Hnrnpl	2	21	21	52.5	64132	589	3.95E-286	0.5895	0.77663	47237	71	0.54109	0.79093	53255	71	0.88056	0.97395	31411	71
P14868	P14868	Aspartate--tRNA ligase, cytoplasmic	DARS	1	33	12	66.5	57136	501	7.84E-155	12478	16039	41383	67	15329	17123	56344	67	1073	11105	36812	68
P14869	P14869	60S acidic ribosomal protein P0	Rplp0	1	13	1	52.7	34216	317	8.40E-111	NaN	NaN	NaN	0	NaN	NaN	NaN	0	NaN	NaN	NaN	0
P14901	P14901	Heme oxygenase 1	Hmox1	1	3	2	18.7	32928	289	2.47E-07	NaN	NaN	NaN	0	NaN	NaN	NaN	0	NaN	NaN	NaN	0
P14921;P27577	P14921;P27577	Protein C-ets-1	ETS1;Ets1	2	2	2	9.1	50407	441	3.24E-07	0.5457	0.79624	32988	2	0.54857	0.7583	29199	2	0.97261	0.94741	46835	2
Q02257;P14923	Q02257;P14923	Junction plakoglobin	Jup;JUP	2	9	4	16.2	81.8	745	3.41E-28	0.82951	1089	20.22	3	0.6254	0.87231	19294	3	0.86502	0.82126	13696	3
P14927	P14927	Cytochrome b-c1 complex subunit 7	UQCRB	1	9	8	62.2	13.53	111	3.60E-54	0.98831	1092	24366	21	1053	11899	40.58	21	12232	11529	28022	21
P15092;O35368	P15092	Interferon-activable protein 204	Ifi204	2	7	5	19.5	71.65	640	9.50E-47	NaN	NaN	NaN	1	NaN	NaN	NaN	1	NaN	NaN	NaN	1
P15104	P15104	Glutamine synthetase	GLUL	1	9	4	28.4	42064	373	1.35E-47	NaN	NaN	NaN	1	NaN	NaN	NaN	1	NaN	NaN	NaN	1
P15105	P15105	Glutamine synthetase	Glul	1	9	4	30	42119	373	4.24E-53	35104	65055	33167	3	24257	4193	36908	3	0.63389	0.5312	38855	3
P15121;P21300	P15121	Aldose reductase	AKR1B1	2	11	7	33.2	35853	316	1.69E-28	0.97715	19558	45802	17	1068	17763	51869	17	0.86513	0.98711	26755	17
P15151	P15151	Poliovirus receptor	PVR	1	2	2	3.6	45302	417	0.00011451	0.38884	0.82803	130.66	2	0.12326	0.23394	77756	2	0.36167	0.32463	47221	2
Q05144;P15153	Q05144;P15153	Ras-related C3 botulinum toxin substrate 2	Rac2;RAC2	2	5	1	28.6	21441	192	3.79E-18	NaN	NaN	NaN	0	NaN	NaN	NaN	0	NaN	NaN	NaN	0
P15170	P15170	Eukaryotic peptide chain release factor GTP-binding subunit ERF3A	GSPT1	1	21	4	43.3	55755	499	9.03E-93	1.05	13126	24035	34	0.83398	12636	52602	34	10352	10478	38551	34
P15260	P15260	Interferon gamma receptor 1	IFNGR1	1	2	2	9.8	54404	489	1.27E-05	NaN	NaN	NaN	0	NaN	NaN	NaN	0	NaN	NaN	NaN	0
P15311	P15311	Ezrin	EZR	1	32	10	53.4	69412	586	1.71E-140	11996	17291	39421	30	12875	16103	52816	30	0.91321	0.93129	42364	29
P15327;P07738	P15327;P07738	Bisphosphoglycerate mutase	Bpgm;BPGM	2	3	3	9.7	29978	259	7.49E-07	NaN	NaN	NaN	0	NaN	NaN	NaN	0	NaN	NaN	NaN	0
P15331;P41219	P15331;P41219	Peripherin	Prph;PRPH	2	6	3	15.2	54267	475	6.58E-29	NaN	NaN	NaN	0	NaN	NaN	NaN	0	NaN	NaN	NaN	0
P16951;P15336	P16951;P15336	Cyclic AMP-dependent transcription factor ATF-2	Atf2;ATF2	2	3	3	12.9	52297	487	7.30E-09	0.7019	0.53683	43105	2	0.43973	0.3663	13293	2	0.68056	0.76679	0.60725	2
P15374;Q9JKB1;P58321	P15374;Q9JKB1;P58321	Ubiquitin carboxyl-terminal hydrolase isozyme L3;Ubiquitin carboxyl-terminal hydrolase isozyme L4	UCHL3;Uchl3;Uchl4	3	8	8	40.9	26182	230	2.64E-22	1064	21598	46432	4	0.82192	15475	50028	4	0.84818	0.89587	26426	4
P15407;P48755	P15407;P48755	Fos-related antigen 1	FOSL1;Fosl1	2	1	1	6.3	29413	271	0.00065593	NaN	NaN	NaN	1	NaN	NaN	NaN	1	NaN	NaN	NaN	1
P15428	P15428	15-hydroxyprostaglandin dehydrogenase [NAD(+)]	HPGD	1	2	2	10.9	28977	266	1.50E-06	NaN	NaN	NaN	1	NaN	NaN	NaN	1	NaN	NaN	NaN	1
P15508	P15508	Spectrin beta chain, erythrocytic	Sptb	1	18	11	11.2	245.25	2128	1.46E-63	NaN	NaN	NaN	0	NaN	NaN	NaN	0	NaN	NaN	NaN	0
P15531	P15531	Nucleoside diphosphate kinase A	NME1	1	11	3	70.4	17149	152	1.99E-93	17009	11648	28025	37	14538	13644	23.29	36	0.89936	0.9762	13934	37
P15532	P15532	Nucleoside diphosphate kinase A	Nme1	1	9	1	56.6	17208	152	1.71E-77	NaN	NaN	NaN	0	NaN	NaN	NaN	0	NaN	NaN	NaN	0
P15559;Q64669	P15559	NAD(P)H dehydrogenase [quinone] 1	NQO1	2	10	10	36.1	30867	274	6.21E-90	12505	0.97946	67875	53	10734	10365	70057	53	0.92933	10857	37489	53
P15586;Q8BFR4	P15586	N-acetylglucosamine-6-sulfatase	GNS	2	13	13	30.1	62081	552	2.81E-86	0.66283	0.75142	25423	25	0.66746	0.79204	60536	25	0.94842	1023	46478	25
P15626	P15626	Glutathione S-transferase Mu 2	Gstm2	1	4	3	22.9	25716	218	2.22E-09	NaN	NaN	NaN	0	NaN	NaN	NaN	0	NaN	NaN	NaN	0
P15735;Q9DB30	P15735;Q9DB30	Phosphorylase b kinase gamma catalytic chain, liver/testis isoform	PHKG2;Phkg2	2	4	4	13.3	46442	406	2.58E-11	NaN	NaN	NaN	1	NaN	NaN	NaN	1	NaN	NaN	NaN	1
P15848	P15848	Arylsulfatase B	ARSB	1	5	5	15	59687	533	5.22E-15	0.88077	0.80948	18183	7	0.92812	0.82561	12937	7	0.92283	0.98352	16138	7
P15880	P15880	40S ribosomal protein S2	RPS2	1	14	1	43.7	31324	293	8.86E-83	0.73253	0.80105	42353	33	0.50659	0.77552	54.14	33	0.79302	0.92731	59312	33
P15882;Q91V57	P15882;Q91V57	N-chimaerin	CHN1;Chn1	2	2	2	5	53172	459	9.27E-05	NaN	NaN	NaN	1	NaN	NaN	NaN	1	NaN	NaN	NaN	1
P15924;E9Q557	P15924	Desmoplakin	DSP	2	5	5	2.8	331.77	2871	1.45E-22	2257	31223	19749	2	21553	33176	26427	2	0.95604	10902	20904	2
P15927	P15927	Replication protein A 32 kDa subunit	RPA2	1	5	5	28.9	29247	270	3.22E-38	11827	0.83642	16346	11	10747	0.92206	26275	11	0.9724	10942	17376	11
P17665;P15954	P17665;P15954	Cytochrome c oxidase subunit 7C, mitochondrial	Cox7c;COX7C	2	1	1	14.3	73325	63	0.00019768	11387	12833	13.31	4	0.98532	13902	13089	4	0.91098	11133	29973	4
P16015;P07451	P16015	Carbonic anhydrase 3	Ca3	2	13	13	59.6	29366	260	3.12E-142	NaN	NaN	NaN	1	NaN	NaN	NaN	1	NaN	NaN	NaN	1
P25785;P16035	P25785;P16035	Metalloproteinase inhibitor 2	Timp2;TIMP2	2	2	2	9.5	24328	220	1.65E-17	NaN	NaN	NaN	0	NaN	NaN	NaN	0	NaN	NaN	NaN	0
P16045	P16045	Galectin-1	Lgals1	1	6	4	54.1	14866	135	1.49E-92	NaN	NaN	NaN	0	NaN	NaN	NaN	0	NaN	NaN	NaN	0
P16070;P15379	P16070	CD44 antigen	CD44	2	12	12	16.8	81537	742	3.37E-87	0.39677	0.53701	28109	23	0.32218	0.48884	44491	23	10212	0.90389	39168	23
Q96QV6;P27661;P16104;REV__Q8NB25	Q96QV6;P27661;P16104	Histone H2A type 1-A;Histone H2A.x	HIST1H2AA;H2afx;H2AFX	4	6	0	35.9	14233	131	9.73E-38	NaN	NaN	NaN	1	NaN	NaN	NaN	1	NaN	NaN	NaN	1
P16110	P16110	Galectin-3	Lgals3	1	5	3	24.2	27515	264	7.12E-17	NaN	NaN	NaN	0	NaN	NaN	NaN	0	NaN	NaN	NaN	0
P16125	P16125	L-lactate dehydrogenase B chain	Ldhb	1	15	2	50	36572	334	2.02E-146	NaN	NaN	NaN	0	NaN	NaN	NaN	0	NaN	NaN	NaN	0
P16152	P16152	Carbonyl reductase [NADPH] 1	CBR1	1	16	9	73.6	30375	277	3.34E-122	17574	16313	35476	32	15752	19043	33458	33	0.99942	10552	15.22	33
P16219	P16219	Short-chain specific acyl-CoA dehydrogenase, mitochondrial	ACADS	1	3	3	9	44297	412	4.97E-07	NaN	NaN	NaN	1	NaN	NaN	NaN	1	NaN	NaN	NaN	1
Q01147;P16220	Q01147;P16220	Cyclic AMP-responsive element-binding protein 1	Creb1;CREB1	2	4	2	13.5	36674	341	1.50E-12	NaN	NaN	NaN	1	NaN	NaN	NaN	1	NaN	NaN	NaN	1
P16260;Q8C0K5	P16260;Q8C0K5	Graves disease carrier protein;Graves disease carrier protein homolog	SLC25A16;Slc25a16	2	2	2	5.1	36223	332	7.94E-06	NaN	NaN	NaN	1	NaN	NaN	NaN	0	NaN	NaN	NaN	1
P16278;Q8VC60;P23780;Q6UWU2	P16278	Beta-galactosidase	GLB1	4	13	13	22.7	76074	677	4.24E-54	0.46225	0.75804	27943	6	0.43455	0.70331	30211	6	0.92943	0.93166	13755	6
P16298;P48453;P48455;P48454	P16298;P48453	Serine/threonine-protein phosphatase 2B catalytic subunit beta isoform	PPP3CB;Ppp3cb	4	7	3	21.2	59024	524	2.30E-18	NaN	NaN	NaN	0	NaN	NaN	NaN	0	NaN	NaN	NaN	0
P16301	P16301	Phosphatidylcholine-sterol acyltransferase	Lcat	1	1	1	2.5	49746	438	3.31E-09	NaN	NaN	NaN	0	NaN	NaN	NaN	0	NaN	NaN	NaN	0
P16332;P22033	P16332;P22033	Methylmalonyl-CoA mutase, mitochondrial	Mut;MUT	2	9	9	17	82843	748	2.20E-31	0.89468	12341	32447	7	0.72732	1.25	10175	7	10464	11075	20078	7
P16333;Q99M51	P16333;Q99M51	Cytoplasmic protein NCK1	NCK1;Nck1	2	10	8	41.6	42864	377	7.70E-33	12967	1437	29369	9	13125	16334	31321	9	0.91708	10122	23823	9
P16383	P16383	GC-rich sequence DNA-binding factor 2	GCFC2	1	3	3	5.5	89384	781	6.18E-06	NaN	NaN	NaN	1	NaN	NaN	NaN	1	NaN	NaN	NaN	1
P16401;P43276	P16401;P43276	Histone H1.5	HIST1H1B;Hist1h1b	2	4	4	22.1	22.58	226	3.65E-14	0.3901	0.83972	0.40268	2	0.13013	0.2368	91883	2	0.32155	0.28208	13.58	2
P16403	P16403	Histone H1.2	HIST1H1C	1	6	1	23.9	21364	213	1.47E-35	0.23177	0.4727	63356	7	0.105	0.18167	41525	7	0.44206	0.3473	102.28	7
P16435	P16435	NADPH--cytochrome P450 reductase	POR	1	17	7	28.5	76689	677	1.76E-98	0.37391	0.76435	59144	24	0.47981	0.80471	48656	24	1255	12418	35772	24
P16546	P16546	Spectrin alpha chain, non-erythrocytic 1	Sptan1	1	118	8	51.3	284.59	2472	0	NaN	NaN	NaN	0	NaN	NaN	NaN	0	NaN	NaN	NaN	0
P16591;P70451	P16591;P70451	Tyrosine-protein kinase Fer	FER;Fer	2	1	1	2.4	94637	822	0.00062761	0.71553	14247	13895	3	11158	18961	65325	3	16254	1361	25077	3
P16615	P16615	Sarcoplasmic/endoplasmic reticulum calcium ATPase 2	ATP2A2	1	35	6	41.1	114.76	1042	3.36E-204	0.52236	0.88382	62134	23	0.5443	0.56652	52622	23	11674	10903	56.1	22
P16675	P16675	Lysosomal protective protein;Lysosomal protective protein 32 kDa chain;Lysosomal protective protein 20 kDa chain	Ctsa	1	7	6	17.1	53844	474	2.86E-37	NaN	NaN	NaN	0	NaN	NaN	NaN	0	NaN	NaN	NaN	0
P16858;Q64467	P16858	Glyceraldehyde-3-phosphate dehydrogenase	Gapdh	2	19	10	54.1	35.81	333	1.10E-115	68182	14156	33057	2	19741	32701	22752	2	0.28475	0.23719	66111	2
P16885	P16885	1-phosphatidylinositol 4,5-bisphosphate phosphodiesterase gamma-2	PLCG2	1	8	3	8.5	147.87	1265	1.71E-34	NaN	NaN	NaN	1	NaN	NaN	NaN	1	NaN	NaN	NaN	1
P16930	P16930	Fumarylacetoacetase	FAH	1	10	9	27.9	46374	419	5.98E-50	0.66672	11105	25809	17	0.72513	0.94538	34723	17	0.78714	0.85708	28763	17
P16949;P54227	P16949;P54227	Stathmin	STMN1;Stmn1	2	7	5	38.9	17302	149	6.00E-31	0.65641	13729	26572	14	0.9793	15772	46443	14	0.94801	1062	43596	14
P16989;Q9JKB3	P16989;Q9JKB3	Y-box-binding protein 3	YBX3;Ybx3	2	10	5	38.2	40089	372	3.47E-136	0.83459	0.89	32.29	16	0.69292	0.85172	27688	16	11219	10961	22991	15
P17028;Q91VN1	P17028;Q91VN1	Zinc finger protein 24	ZNF24;Znf24	2	7	7	26.1	42155	368	2.35E-29	0.51677	0.82676	77447	4	0.50718	0.96755	98.74	3	0.84233	0.86533	59552	3
P17047	P17047	Lysosome-associated membrane glycoprotein 2	Lamp2	1	2	2	4.6	45681	415	1.16E-08	NaN	NaN	NaN	0	NaN	NaN	NaN	0	NaN	NaN	NaN	0
P17050	P17050	Alpha-N-acetylgalactosaminidase	NAGA	1	6	5	15.3	46564	411	1.72E-20	0.68143	13858	10738	2	0.59244	11023	77448	2	0.99334	0.93794	79.77	2
P17066;P48741	P17066;P48741	Heat shock 70 kDa protein 6;Putative heat shock 70 kDa protein 7	HSPA6;HSPA7	2	9	1	12.9	71027	643	1.46E-71	10098	11386	15365	11	0.82864	0.95136	14424	11	0.83306	0.93598	66188	11
P17096;P17095	P17096;P17095	High mobility group protein HMG-I/HMG-Y	HMGA1;Hmga1	2	3	3	33.6	11676	107	1.12E-16	0.5943	0.80021	13585	8	0.48663	0.60051	15.41	8	0.87891	0.8807	22344	8
Q8BK08;P17152	Q8BK08;P17152	Transmembrane protein 11, mitochondrial	Tmem11;TMEM11	2	2	2	13.7	21311	190	2.20E-05	34057	30894	85747	4	41384	40335	100.75	4	1342	14269	10515	4
P17174	P17174	Aspartate aminotransferase, cytoplasmic	GOT1	1	20	12	59.3	46247	413	2.54E-160	17284	20649	38.61	37	13684	17235	49121	37	0.97657	10008	29046	37
P17182	P17182	Alpha-enolase	Eno1	1	25	8	64.5	47.14	434	3.32E-257	17714	36723	57936	4	10534	17326	50608	4	0.59049	0.50079	19552	5
P17213	P17213	Bactericidal permeability-increasing protein	BPI	1	1	1	1.8	53899	487	0.0016785	0.34506	0.68399	16395	2	0.12963	0.26554	13.69	2	0.43985	0.42191	86813	2
P17405	P17405	Sphingomyelin phosphodiesterase	SMPD1	1	2	2	3	69751	629	0.00017228	NaN	NaN	NaN	0	NaN	NaN	NaN	0	NaN	NaN	NaN	0
P17427	P17427	AP-2 complex subunit alpha-2	Ap2a2	1	20	2	27.5	104.02	938	7.78E-115	20342	2037	47571	5	0.98799	14863	67795	5	0.59428	0.71459	26127	5
P17480;P25976	P17480;P25976	Nucleolar transcription factor 1	UBTF;Ubtf	2	20	20	29.6	89405	764	2.05E-88	0.43351	0.83105	31378	20	0.54467	0.77743	55169	20	0.88665	0.94239	44.83	20
P17544	P17544	Cyclic AMP-dependent transcription factor ATF-7	ATF7	1	2	2	10.1	52967	494	2.61E-25	0.89512	0.81706	33903	2	0.70633	0.68052	93177	2	0.75724	0.81108	15615	2
P17563;Q63836;Q13228	P17563;Q63836	Selenium-binding protein 1;Selenium-binding protein 2	Selenbp1;Selenbp2	3	5	5	16.9	52513	472	1.72E-30	NaN	NaN	NaN	0	NaN	NaN	NaN	0	NaN	NaN	NaN	0
P17568;Q9CR61	P17568	NADH dehydrogenase [ubiquinone] 1 beta subcomplex subunit 7	NDUFB7	2	5	5	47.4	16402	137	1.88E-33	0.64581	0.89143	14245	2	0.72069	10519	32324	2	10775	10946	46522	2
P17643;P07147	P17643	5,6-dihydroxyindole-2-carboxylic acid oxidase	TYRP1	2	18	18	41	60724	537	5.67E-170	0.1459	0.18631	39098	23	0.15881	0.17616	51319	23	1085	1129	35219	23
P17655	P17655	Calpain-2 catalytic subunit	CAPN2	1	20	13	31.9	79994	700	5.97E-57	1194	21265	25947	17	12102	20552	30.03	17	0.92815	0.92672	32861	17
P17661	P17661	Desmin	DES	1	9	1	19.1	53535	470	1.80E-25	NaN	NaN	NaN	1	NaN	NaN	NaN	0	NaN	NaN	NaN	1
P17706	P17706	Tyrosine-protein phosphatase non-receptor type 2	PTPN2	1	3	3	11.3	48473	415	1.02E-07	NaN	NaN	NaN	1	NaN	NaN	NaN	1	NaN	NaN	NaN	1
P17710	P17710	Hexokinase-1	Hk1	1	19	3	18.8	108.3	974	2.25E-52	NaN	NaN	NaN	0	NaN	NaN	NaN	0	NaN	NaN	NaN	0
P17742	P17742	Peptidyl-prolyl cis-trans isomerase A	Ppia	1	10	2	69.5	17971	164	2.67E-106	NaN	NaN	NaN	0	NaN	NaN	NaN	0	NaN	NaN	NaN	0
P17751	P17751	Triosephosphate isomerase	Tpi1	1	15	4	62.5	32191	299	1.81E-158	NaN	NaN	NaN	1	NaN	NaN	NaN	1	NaN	NaN	NaN	1
P17812;P70698	P17812;P70698	CTP synthase 1	CTPS1;Ctps1	2	12	12	25.5	66.69	591	5.50E-73	15318	16352	46207	17	14534	15363	62911	17	0.94453	10088	51053	17
P17813	P17813	Endoglin	ENG	1	3	3	6.8	70577	658	2.71E-09	NaN	NaN	NaN	1	NaN	NaN	NaN	1	NaN	NaN	NaN	1
P17844;Q61656	P17844;Q61656	Probable ATP-dependent RNA helicase DDX5	DDX5;Ddx5	2	36	26	51.3	69147	614	3.47E-205	0.55695	0.67159	32511	93	0.50941	0.64394	37.36	92	0.87886	0.95378	29122	92
P17858	P17858	6-phosphofructokinase, liver type	PFKL	1	16	8	24.6	85018	780	3.95E-85	16013	22083	21341	15	14547	18421	49407	15	0.82668	0.8898	42816	15
P17900	P17900	Ganglioside GM2 activator;Ganglioside GM2 activator isoform short	GM2A	1	3	3	15	20838	193	1.42E-09	20586	16923	21282	8	15677	21083	28545	8	0.87604	10071	28601	8
P17931	P17931	Galectin-3	LGALS3	1	10	8	32.4	26152	250	3.41E-51	12819	19085	37868	48	11602	15382	55409	48	0.93093	0.90609	34132	48
P17980;O88685	P17980;O88685	26S protease regulatory subunit 6A	PSMC3;Psmc3	2	21	21	59	49203	439	1.66E-143	12008	12689	27286	43	11127	12727	41.29	43	0.92198	10264	36.32	43
P17987	P17987	T-complex protein 1 subunit alpha	TCP1	1	26	5	54	60343	556	4.41E-173	10709	10459	30.13	55	0.90457	10022	51493	55	0.91737	10083	39794	55
P18031	P18031	Tyrosine-protein phosphatase non-receptor type 1	PTPN1	1	23	12	50.3	49966	435	2.71E-98	0.82001	11783	51.55	28	0.87722	12384	59086	28	10167	11255	40491	28
P18074;O08811	P18074;O08811	TFIIH basal transcription factor complex helicase XPD subunit	ERCC2;Ercc2	2	8	8	14.6	86908	760	1.67E-24	0.70656	0.8043	51256	10	0.66711	0.69788	32332	10	0.84537	0.93961	19989	9
P18084;O70309	P18084;O70309	Integrin beta-5	ITGB5;Itgb5	2	2	2	5.6	88053	799	2.68E-07	NaN	NaN	NaN	1	NaN	NaN	NaN	1	NaN	NaN	NaN	1
P18085	P18085	ADP-ribosylation factor 4	ARF4	1	9	4	63.3	20511	180	3.81E-65	10806	11988	19.38	24	10486	12784	24292	24	0.94308	10294	15322	24
P18124	P18124	60S ribosomal protein L7	RPL7	1	13	5	45.2	29225	248	4.12E-53	0.42029	0.48644	30815	34	0.32747	0.47242	42458	34	0.95292	0.99341	31638	34
P18206	P18206	Vinculin	VCL	1	45	6	48.9	123.8	1134	4.39E-221	12936	20297	25604	37	12622	18182	42102	36	0.88447	0.84874	34157	37
P18242	P18242	Cathepsin D	Ctsd	1	8	7	22.9	44953	410	1.81E-57	NaN	NaN	NaN	0	NaN	NaN	NaN	0	NaN	NaN	NaN	0
P18583	P18583	Protein SON	SON	1	29	15	19	263.83	2426	7.35E-106	0.51668	0.65518	31188	32	0.46639	0.68419	40988	32	0.91743	10768	46591	30
P18615;P19426	P18615	Negative elongation factor E	NELFE	2	8	8	25.5	43239	380	1.03E-37	0.34609	0.77828	40007	3	0.87496	12948	16259	3	18417	16482	44745	3
Q9CPR4;P18621	Q9CPR4;P18621	60S ribosomal protein L17	Rpl17;RPL17	2	10	10	48.4	21423	184	3.67E-40	0.59054	0.564	21049	36	0.61197	0.5942	57371	36	0.90972	0.97397	47641	36
P51812;P18654;Q9UK32;Q9WUT3;Q15349;Q7TPS0;Q9Y2H9;Q9R1L5;Q60592;Q6P0Q8;O15021	P51812;P18654;Q9UK32	Ribosomal protein S6 kinase alpha-3;Ribosomal protein S6 kinase alpha-6	RPS6KA3;Rps6ka3;RPS6KA6	11	6	3	10.8	83735	740	9.31E-15	1671	22787	33744	2	0.57136	0.79788	30729	2	0.46193	0.46363	63428	2
Q9DBJ1;P18669;P15259;Q8N0Y7	Q9DBJ1;P18669;P15259	Phosphoglycerate mutase 1;Phosphoglycerate mutase 2	Pgam1;PGAM1;PGAM2	4	9	6	44.1	28832	254	1.40E-115	2319	2161	24726	59	20295	21705	32189	58	0.90152	0.98433	19375	59
P18754;Q8VE37	P18754	Regulator of chromosome condensation	RCC1	2	15	15	48.7	44969	421	4.16E-152	0.52328	0.59386	17937	23	0.42132	0.58766	41.46	23	0.91712	10076	31454	23
P18760	P18760	Cofilin-1	Cfl1	1	14	2	71.1	18559	166	9.03E-108	NaN	NaN	NaN	0	NaN	NaN	NaN	0	NaN	NaN	NaN	0
P18846;P81269	P18846;P81269	Cyclic AMP-dependent transcription factor ATF-1	ATF1;Atf1	2	4	2	18.5	29232	271	4.87E-26	0.53995	0.73695	20.08	3	0.59374	0.75716	26017	3	0.8082	0.98931	12222	3
P18858;P37913	P18858	DNA ligase 1	LIG1	2	13	13	18.7	101.73	919	3.16E-47	12981	11852	25923	19	10072	12031	33977	20	0.86422	0.96617	23779	20
P18859	P18859	ATP synthase-coupling factor 6, mitochondrial	ATP5J	1	7	7	55.6	12587	108	8.81E-67	0.71215	0.98152	36.57	14	0.79477	10125	30087	14	1097	11005	33391	14
P18887;Q60596	P18887	DNA repair protein XRCC1	XRCC1	2	7	7	17.2	69476	633	3.70E-38	10587	0.9959	26243	15	0.92061	10275	35579	15	0.93705	10413	25289	15
P19021;P97467	P19021;P97467	Peptidyl-glycine alpha-amidating monooxygenase;Peptidylglycine alpha-hydroxylating monooxygenase;Peptidyl-alpha-hydroxyglycine alpha-amidating lyase	PAM;Pam	2	2	2	2.3	108.33	973	7.18E-05	NaN	NaN	NaN	0	NaN	NaN	NaN	0	NaN	NaN	NaN	0
P19096	P19096	Fatty acid synthase;[Acyl-carrier-protein] S-acetyltransferase;[Acyl-carrier-protein] S-malonyltransferase;3-oxoacyl-[acyl-carrier-protein] synthase;3-oxoacyl-[acyl-carrier-protein] reductase;3-hydroxyacyl-[acyl-carrier-protein] dehydratase;Enoyl-[acyl-carrier-protein] reductase;Oleoyl-[acyl-carrier-protein] hydrolase	Fasn	1	54	43	28.8	272.43	2504	1.00E-272	NaN	NaN	NaN	0	NaN	NaN	NaN	0	NaN	NaN	NaN	0
P19137	P19137	Laminin subunit alpha-1	Lama1	1	109	91	40	338.17	3084	0	67757	15426	202.26	9	18176	34648	173.76	9	0.24482	0.2174	60506	9
P19157;P46425	P19157;P46425	Glutathione S-transferase P 1;Glutathione S-transferase P 2	Gstp1;Gstp2	2	3	2	21.4	23609	210	2.33E-22	NaN	NaN	NaN	0	NaN	NaN	NaN	0	NaN	NaN	NaN	0
P19174;Q62077	P19174;Q62077	1-phosphatidylinositol 4,5-bisphosphate phosphodiesterase gamma-1	PLCG1;Plcg1	2	29	29	28.5	148.53	1290	2.43E-140	0.65324	13153	27993	27	0.96012	15725	23877	27	13026	12183	25.63	27
P19221	P19221	Prothrombin;Activation peptide fragment 1;Activation peptide fragment 2;Thrombin light chain;Thrombin heavy chain	F2	1	24	20	41.6	70268	618	5.00E-88	18911	41233	84624	5	11817	20409	28.27	5	0.42513	0.43972	66623	5
P19246	P19246	Neurofilament heavy polypeptide	Nefh	1	2	1	1.8	116.99	1090	4.70E-08	NaN	NaN	NaN	0	NaN	NaN	NaN	0	NaN	NaN	NaN	0
P19256	P19256	Lymphocyte function-associated antigen 3	CD58	1	1	1	6	28147	250	4.12E-05	NaN	NaN	NaN	0	NaN	NaN	NaN	0	NaN	NaN	NaN	0
P19324	P19324	Serpin H1	Serpinh1	1	11	4	32.6	46533	417	4.51E-64	NaN	NaN	NaN	0	NaN	NaN	NaN	0	NaN	NaN	NaN	0
P19338	P19338	Nucleolin	NCL	1	35	22	48	76613	710	0	0.65099	0.79152	24645	135	0.56605	0.77128	33547	135	0.88031	0.99848	34645	135
P19367;Q91W97;Q2TB90	P19367	Hexokinase-1	HK1	3	34	16	35.7	102.48	917	2.90E-122	0.53576	0.8701	20188	39	0.63965	0.89222	30.71	40	11581	10751	36.01	39
P19387;P97760	P19387;P97760	DNA-directed RNA polymerase II subunit RPB3	POLR2C;Polr2c	2	2	2	13.5	31441	275	6.44E-40	0.76731	0.83428	10.38	4	0.66101	0.9183	14166	4	0.87369	10501	33473	4
P19388;Q80UW8	P19388;Q80UW8	DNA-directed RNA polymerases I, II, and III subunit RPABC1	POLR2E;Polr2e	2	7	7	44.3	24551	210	9.49E-31	0.35554	0.75016	15557	5	0.53677	0.90225	14566	5	13839	11529	15454	5
P19404	P19404	NADH dehydrogenase [ubiquinone] flavoprotein 2, mitochondrial	NDUFV2	1	7	3	39	27391	249	7.60E-38	0.82941	1234	38589	8	0.75346	11417	51643	8	0.97324	10424	25046	8
P19447;P49135	P19447;P49135	TFIIH basal transcription factor complex helicase XPB subunit	ERCC3;Ercc3	2	4	4	8.7	89277	782	4.01E-10	NaN	NaN	NaN	1	NaN	NaN	NaN	1	NaN	NaN	NaN	1
P19474	P19474	E3 ubiquitin-protein ligase TRIM21	TRIM21	1	5	5	11.4	54169	475	3.47E-13	NaN	NaN	NaN	1	NaN	NaN	NaN	1	NaN	NaN	NaN	1
P19525	P19525	Interferon-induced, double-stranded RNA-activated protein kinase	EIF2AK2	1	9	9	16	62094	551	4.42E-41	33124	30369	48.46	5	24651	27309	11733	5	0.82396	0.99886	41716	5
P19532;Q9WTW4;O14948;Q64092	P19532;Q9WTW4;O14948;Q64092	Transcription factor E3;Transcription factor EC	TFE3;Tfec;TFEC;Tfe3	4	2	1	4.7	61.52	575	3.17E-06	NaN	NaN	NaN	0	NaN	NaN	NaN	0	NaN	NaN	NaN	0
P19536	P19536	Cytochrome c oxidase subunit 5B, mitochondrial	Cox5b	1	2	1	14.1	13813	128	9.77E-09	NaN	NaN	NaN	0	NaN	NaN	NaN	0	NaN	NaN	NaN	0
P19623	P19623	Spermidine synthase	SRM	1	9	3	39.4	33824	302	2.55E-55	0.72581	15066	42905	5	0.28069	0.51789	111.45	5	0.46046	0.40054	67653	5
P19783	P19783	Cytochrome c oxidase subunit 4 isoform 1, mitochondrial	Cox4i1	1	5	5	35.5	19.53	169	2.75E-15	0.8666	15157	29957	3	0.59573	10113	14851	3	0.73017	0.73935	17391	3
P19784;O54833	P19784;O54833	Casein kinase II subunit alpha	CSNK2A2;Csnk2a2	2	9	9	38	41213	350	6.59E-48	0.84242	0.80879	24578	15	0.74264	0.9491	24778	14	0.968	11203	21666	15
P19838;P25799	P19838;P25799	Nuclear factor NF-kappa-B p105 subunit;Nuclear factor NF-kappa-B p50 subunit	NFKB1;Nfkb1	2	6	6	10.5	105.35	968	9.85E-21	NaN	NaN	NaN	1	NaN	NaN	NaN	1	NaN	NaN	NaN	1
P19973	P19973	Lymphocyte-specific protein 1	Lsp1	1	5	5	27.3	36713	330	2.90E-60	NaN	NaN	NaN	0	NaN	NaN	NaN	0	NaN	NaN	NaN	0
P20020	P20020	Plasma membrane calcium-transporting ATPase 1	ATP2B1	1	15	7	16.7	138.75	1258	2.14E-53	0.83431	0.96434	32827	14	0.60348	0.92928	44931	13	0.83189	0.84691	25655	14
P20029	P20029	78 kDa glucose-regulated protein	Hspa5	1	34	2	49.9	72421	655	3.17E-278	NaN	NaN	NaN	0	NaN	NaN	NaN	0	NaN	NaN	NaN	0
P20040	P20040	H-2 class II histocompatibility antigen, E-Q beta chain		1	1	1	4.5	30204	264	0.00032561	NaN	NaN	NaN	0	NaN	NaN	NaN	0	NaN	NaN	NaN	0
P20042	P20042	Eukaryotic translation initiation factor 2 subunit 2	EIF2S2	1	23	14	59.5	38388	333	1.23E-246	10422	0.96843	34837	32	0.87048	10315	31077	32	0.87945	0.96856	18416	32
P20060	P20060	Beta-hexosaminidase subunit beta	Hexb	1	7	5	13.2	61115	536	1.54E-20	NaN	NaN	NaN	0	NaN	NaN	NaN	0	NaN	NaN	NaN	0
P20073	P20073	Annexin A7	ANXA7	1	11	6	25.6	52739	488	9.60E-50	46089	45502	58.2	12	49637	43503	61903	12	0.98722	10684	14978	12
P20152	P20152	Vimentin	Vim	1	52	8	80.3	53687	466	0	26126	38368	11928	2	16407	22226	31819	2	0.64137	0.64254	64068	2
P20248	P20248	Cyclin-A2	CCNA2	1	2	2	5.6	48.55	432	5.57E-08	0.55003	0.54501	23278	3	0.48534	0.7217	22316	3	0.84586	0.95192	37736	3
Q64152;P20290	Q64152;P20290	Transcription factor BTF3	Btf3;BTF3	2	10	10	59.8	22031	204	7.86E-165	0.92677	0.97631	22187	20	0.80823	0.81809	45.39	20	0.86823	0.93188	37953	20
P63011;P20336	P63011;P20336	Ras-related protein Rab-3A	Rab3a;RAB3A	2	4	2	26.8	24.97	220	2.28E-31	NaN	NaN	NaN	0	NaN	NaN	NaN	0	NaN	NaN	NaN	0
P20338;P56371	P20338;P56371	Ras-related protein Rab-4A	RAB4A;Rab4a	2	3	3	18.3	23871	213	1.78E-08	0.54803	0.77741	26949	5	0.56506	0.66942	31428	5	0.97826	0.89598	38904	5
Q9CQD1;P20339	Q9CQD1;P20339	Ras-related protein Rab-5A	Rab5a;RAB5A	2	6	3	33	23598	215	3.43E-25	0.36803	0.74795	85631	2	0.50751	0.97523	34907	2	13764	13849	44552	2
P20340	P20340	Ras-related protein Rab-6A	RAB6A	1	10	1	47.6	23593	208	1.45E-29	0.90369	0.65447	27717	6	1073	0.95235	19781	6	11288	12621	33059	6
P20585;P13705	P20585	DNA mismatch repair protein Msh3	MSH3	2	4	4	4.1	127.41	1137	3.98E-12	0.80403	10377	5409	4	0.75884	0.82181	20429	4	0.87882	1013	23233	4
P20592;P09922;Q9WVP9;P20591	P20592	Interferon-induced GTP-binding protein Mx2	MX2	4	3	3	6.9	82088	715	2.29E-09	NaN	NaN	NaN	0	NaN	NaN	NaN	0	NaN	NaN	NaN	0
P20618	P20618	Proteasome subunit beta type-1	PSMB1	1	9	2	43.2	26489	241	2.12E-74	16673	15309	48489	21	12763	13103	52883	21	0.89809	0.92506	17149	21
P20645	P20645	Cation-dependent mannose-6-phosphate receptor	M6PR	1	7	2	25.6	30993	277	2.35E-45	0.64597	0.62473	43876	33	0.57261	0.55139	35789	33	0.88677	0.88172	33	33
P20674	P20674	Cytochrome c oxidase subunit 5A, mitochondrial	COX5A	1	4	2	32	16762	150	4.96E-25	0.8456	0.95417	36472	17	0.85342	11894	34287	17	10415	11245	17052	17
P20700	P20700	Lamin-B1	LMNB1	1	40	8	61.4	66408	586	7.91E-280	0.62195	0.83194	29104	95	0.59099	0.81858	40603	95	0.90771	0.9815	25624	95
P20801;P02585	P20801;P02585	Troponin C, skeletal muscle	Tnnc2;TNNC2	2	7	6	50.6	18.11	160	4.18E-79	NaN	NaN	NaN	0	NaN	NaN	NaN	0	NaN	NaN	NaN	0
P20810	P20810	Calpastatin	CAST	1	19	18	40.7	76572	708	1.36E-132	11239	20621	25302	31	11388	18108	29435	31	0.91732	0.92023	19838	31
P20839;P50096	P20839;P50096	Inosine-5-monophosphate dehydrogenase 1	IMPDH1;Impdh1	2	9	7	24.1	55405	514	1.17E-21	0.93658	0.99903	37719	7	0.8115	0.96871	32777	7	10223	11875	27518	7
P20918;CON__P06868	P20918	Plasminogen;Plasmin heavy chain A;Activation peptide;Angiostatin;Plasmin heavy chain A, short form;Plasmin light chain B	Plg	2	45	42	63.5	90807	812	3.57E-250	10987	11201	173.63	3	16933	19913	164.87	3	0.42372	0.35854	96439	3
P20929	P20929	Nebulin	NEB	1	16	16	4	772.92	6669	5.43E-42	NaN	NaN	NaN	0	NaN	NaN	NaN	0	NaN	NaN	NaN	0
P20933;Q64191	P20933;Q64191	N(4)-(beta-N-acetylglucosaminyl)-L-asparaginase;Glycosylasparaginase alpha chain;Glycosylasparaginase beta chain	AGA;Aga	2	2	2	11.3	37208	346	4.81E-05	NaN	NaN	NaN	0	NaN	NaN	NaN	0	NaN	NaN	NaN	0
P20936	P20936	Ras GTPase-activating protein 1	RASA1	1	2	2	3.8	116.4	1047	2.90E-12	NaN	NaN	NaN	0	NaN	NaN	NaN	0	NaN	NaN	NaN	0
Q9D0J8;P20962	Q9D0J8;P20962	Parathymosin	Ptms;PTMS	2	1	1	10.9	11.43	101	3.09E-07	0.75443	15017	12425	2	0.83647	14575	2966	2	10662	0.89899	17346	2
P21127;Q9UQ88	P21127;Q9UQ88	Cyclin-dependent kinase 11B;Cyclin-dependent kinase 11A	CDK11B;CDK11A	2	15	3	21.5	92706	795	8.65E-37	0.70428	0.77277	13415	15	0.67818	0.78759	22.78	15	0.92268	10544	19028	15
P21180	P21180	Complement C2;Complement C2b fragment;Complement C2a fragment	C2	1	3	3	4.1	84741	760	2.82E-07	NaN	NaN	NaN	0	NaN	NaN	NaN	0	NaN	NaN	NaN	0
P21281;P15313	P21281	V-type proton ATPase subunit B, brain isoform	ATP6V1B2	2	21	2	47.7	56.5	511	1.87E-127	0.86369	12986	40871	30	10426	1551	55324	30	11007	10726	23497	30
P21283;Q9Z1G3	P21283;Q9Z1G3	V-type proton ATPase subunit C 1	ATP6V1C1;Atp6v1c1	2	26	26	59.9	43941	382	3.74E-128	11702	13275	29042	34	0.99349	12839	53981	34	0.97457	10766	39943	34
P97315;P21291	P97315;P21291	Cysteine and glycine-rich protein 1	Csrp1;CSRP1	2	8	8	50.8	20583	193	5.83E-50	27466	39166	50078	6	16657	2962	47711	6	0.72885	0.67177	21189	6
P21333	P21333	Filamin-A	FLNA	1	107	32	50.4	280.74	2647	0	11832	12712	39057	253	10195	12619	42566	254	0.93771	0.99463	35078	253
P21359;Q04690	P21359;Q04690	Neurofibromin;Neurofibromin truncated;Neurofibromin	NF1;Nf1	2	5	5	2.3	319.37	2839	3.98E-13	0.74985	0.72486	11519	3	0.68231	0.75294	44494	3	0.76906	0.87565	27436	3
P21399;O00408	P21399	Cytoplasmic aconitate hydratase	ACO1	2	19	8	28.9	98398	889	4.21E-84	10728	22094	50796	14	0.91347	16786	54528	14	0.85352	0.94001	28035	14
P21550;P13929	P21550;P13929	Beta-enolase	Eno3;ENO3	2	13	6	37.8	47024	434	4.51E-72	NaN	NaN	NaN	0	NaN	NaN	NaN	0	NaN	NaN	NaN	0
P21580;Q60769	P21580;Q60769	Tumor necrosis factor alpha-induced protein 3;A20p50;A20p37;Tumor necrosis factor alpha-induced protein 3	TNFAIP3;Tnfaip3	2	12	12	17.3	89613	790	9.78E-32	12919	19954	24388	8	0.8491	14157	77607	8	0.61559	0.67858	63511	8
P21614;P02774	P21614	Vitamin D-binding protein	Gc	2	26	26	63.4	53.6	476	0	NaN	NaN	NaN	1	NaN	NaN	NaN	1	NaN	NaN	NaN	1
P21619	P21619	Lamin-B2	Lmnb2	1	14	2	19.8	67317	596	3.46E-42	NaN	NaN	NaN	0	NaN	NaN	NaN	0	NaN	NaN	NaN	0
Q8IZX4;P21675;Q80UV9	Q8IZX4;P21675;Q80UV9	Transcription initiation factor TFIID subunit 1-like;Transcription initiation factor TFIID subunit 1	TAF1L;TAF1;Taf1	3	2	2	1.5	207.3	1826	6.35E-06	0.48713	0.65283	25513	2	0.4288	0.52894	17974	2	0.90432	0.90583	14468	2
P21796;Q60932	P21796;Q60932	Voltage-dependent anion-selective channel protein 1	VDAC1;Vdac1	2	17	17	69.3	30772	283	4.29E-220	0.64198	0.88718	27.62	93	0.66029	0.97977	35897	93	10626	12009	43228	92
P21860;Q61526	P21860;Q61526	Receptor tyrosine-protein kinase erbB-3	ERBB3;Erbb3	2	3	3	3.2	148.1	1342	2.43E-06	NaN	NaN	NaN	0	NaN	NaN	NaN	0	NaN	NaN	NaN	0
P21912	P21912	Succinate dehydrogenase [ubiquinone] iron-sulfur subunit, mitochondrial	SDHB	1	13	5	49.6	31629	280	1.93E-46	0.86531	13937	47657	24	0.88657	12466	33277	24	10719	10828	44085	24
P21926	P21926	CD9 antigen	CD9	1	2	2	7	25416	228	7.01E-06	0.33296	0.50228	17.63	2	0.30484	0.46479	14885	2	0.86233	0.88322	41554	2
Q6P3A8;P21953	Q6P3A8;P21953	2-oxoisovalerate dehydrogenase subunit beta, mitochondrial	Bckdhb;BCKDHB	2	1	1	5.1	42.88	390	1.39E-06	NaN	NaN	NaN	0	NaN	NaN	NaN	0	NaN	NaN	NaN	0
P21964;O88587	P21964	Catechol O-methyltransferase	COMT	2	6	6	32.5	30037	271	2.17E-14	0.48555	0.61995	39.89	14	0.60811	0.68588	43491	14	10686	11337	29774	14
P21980	P21980	Protein-glutamine gamma-glutamyltransferase 2	TGM2	1	4	2	8.2	77328	687	3.07E-23	NaN	NaN	NaN	1	NaN	NaN	NaN	1	NaN	NaN	NaN	1
P21981	P21981	Protein-glutamine gamma-glutamyltransferase 2	Tgm2	1	11	9	23.3	77.06	686	3.03E-48	NaN	NaN	NaN	0	NaN	NaN	NaN	0	NaN	NaN	NaN	0
P22059;Q3B7Z2;Q5QNQ6;Q969R2	P22059;Q3B7Z2	Oxysterol-binding protein 1	OSBP;Osbp	4	17	17	32.3	89.42	807	2.36E-83	11368	12159	29461	15	0.75321	0.97962	42569	15	0.83299	0.86992	21536	15
P22061;P23506	P22061	Protein-L-isoaspartate(D-aspartate) O-methyltransferase	PCMT1	2	8	8	28.6	24636	227	1.58E-37	0.87034	12553	42067	10	0.70022	0.97482	32149	10	0.81973	0.95175	41982	10
P22087;P35550	P22087;P35550	rRNA 2-O-methyltransferase fibrillarin	FBL;Fbl	2	13	10	41.4	33784	321	7.83E-50	0.55652	0.71048	48564	21	0.43782	0.58475	64168	21	0.84109	0.88755	30951	21
P22102	P22102	Trifunctional purine biosynthetic protein adenosine-3;Phosphoribosylamine--glycine ligase;Phosphoribosylformylglycinamidine cyclo-ligase;Phosphoribosylglycinamide formyltransferase	GART	1	31	21	38.2	107.77	1010	9.18E-189	15255	13953	31401	55	14298	15909	41039	55	0.93147	10522	20914	54
P22105	P22105	Tenascin-X	TNXB	1	3	3	0.8	464.32	4289	3.08E-07	NaN	NaN	NaN	0	NaN	NaN	NaN	0	NaN	NaN	NaN	0
P22223;P10287	P22223	Cadherin-3	CDH3	2	14	13	27.4	91417	829	1.64E-48	0.1657	0.35764	18126	3	0.19851	0.31633	38.41	3	10807	0.90231	75989	2
P22234	P22234	Multifunctional protein ADE2;Phosphoribosylaminoimidazole-succinocarboxamide synthase;Phosphoribosylaminoimidazole carboxylase	PAICS	1	24	8	54.6	47079	425	1.07E-171	12158	1568	25658	52	11416	15128	62624	52	0.96049	0.99102	43198	52
P22307	P22307	Non-specific lipid-transfer protein	SCP2	1	15	8	30.5	58993	547	1.80E-68	0.86282	1.32	38981	33	0.85646	11472	50999	33	0.88898	0.96669	33841	33
P22314;P31254	P22314	Ubiquitin-like modifier-activating enzyme 1	UBA1	2	39	13	46.4	117.85	1058	1.25E-291	0.76102	12871	37264	89	0.79242	12989	48081	89	0.86398	0.93371	30.81	89
P22392	P22392	Nucleoside diphosphate kinase B	NME2	1	12	1	77	17298	152	6.46E-111	17758	13518	29319	98	1.4	15029	42493	98	0.87163	0.98102	36807	98
P22413;P06802	P22413	Ectonucleotide pyrophosphatase/phosphodiesterase family member 1;Alkaline phosphodiesterase I;Nucleotide pyrophosphatase	ENPP1	2	4	4	9	104.92	925	9.44E-18	NaN	NaN	NaN	1	NaN	NaN	NaN	1	NaN	NaN	NaN	1
P22570;Q61578	P22570	NADPH:adrenodoxin oxidoreductase, mitochondrial	FDXR	2	11	11	30.3	53836	491	6.59E-49	0.68011	0.76915	52442	26	0.65364	0.74169	42315	26	0.90382	10095	44828	26
P22599;Q00898	P22599;Q00898	Alpha-1-antitrypsin 1-2;Alpha-1-antitrypsin 1-5	Serpina1b;Serpina1e	2	10	3	26.2	45974	413	1.63E-86	NaN	NaN	NaN	0	NaN	NaN	NaN	0	NaN	NaN	NaN	0
P22670;P48377	P22670;P48377	MHC class II regulatory factor RFX1	RFX1;Rfx1	2	2	2	4.9	104.76	979	6.29E-13	0.40824	0.59129	21939	2	0.59105	0.86843	13407	2	13318	13654	86842	2
P22681;P22682	P22681;P22682	E3 ubiquitin-protein ligase CBL	CBL;Cbl	2	4	4	7.5	99632	906	8.12E-11	12166	18164	44576	4	0.84566	12429	28315	4	0.78558	0.80858	25786	4
P22694;P22612	P22694	cAMP-dependent protein kinase catalytic subunit beta	PRKACB	2	5	2	20.2	40622	351	2.43E-20	20548	15055	59597	3	20787	1699	95659	3	0.91974	1037	22033	3
P22695	P22695	Cytochrome b-c1 complex subunit 2, mitochondrial	UQCRC2	1	14	11	37.3	48442	453	3.06E-132	11686	13206	19194	36	14629	16726	35419	36	12401	13502	25987	35
P22830	P22830	Ferrochelatase, mitochondrial	FECH	1	5	4	15.1	47862	423	2.64E-12	0.58943	1089	37086	7	0.77074	1197	29194	7	1095	11806	30508	7
P23116	P23116	Eukaryotic translation initiation factor 3 subunit A	Eif3a	1	48	2	34.7	161.93	1344	1.29E-184	NaN	NaN	NaN	0	NaN	NaN	NaN	0	NaN	NaN	NaN	0
P23142	P23142	Fibulin-1	FBLN1	1	8	3	19.2	77213	703	3.78E-66	NaN	NaN	NaN	0	NaN	NaN	NaN	0	NaN	NaN	NaN	0
P23193;Q15560;Q9QVN7	P23193	Transcription elongation factor A protein 1	TCEA1	3	9	2	33.6	33969	301	6.91E-31	NaN	NaN	NaN	1	NaN	NaN	NaN	1	NaN	NaN	NaN	1
P23229;Q61739	P23229	Integrin alpha-6;Integrin alpha-6 heavy chain;Integrin alpha-6 light chain	ITGA6	2	16	16	17.8	126.63	1130	1.01E-64	0.19715	0.23617	41715	3	0.059463	0.11768	47169	3	0.44119	0.46335	82415	3
P23246;Q8VIJ6	P23246;Q8VIJ6	Splicing factor, proline- and glutamine-rich	SFPQ;Sfpq	2	31	29	39.2	76149	707	5.26E-156	0.55326	0.73772	31394	97	0.51125	0.73698	36423	97	0.93496	10075	24558	97
P23258;Q9NRH3;P83887;Q8VCK3	P23258;Q9NRH3;P83887;Q8VCK3	Tubulin gamma-1 chain;Tubulin gamma-2 chain	TUBG1;TUBG2;Tubg1;Tubg2	4	13	13	37.7	51169	451	1.38E-60	14926	13448	29068	16	1557	14249	45601	16	0.90756	0.99587	29623	16
P23284	P23284	Peptidyl-prolyl cis-trans isomerase B	PPIB	1	17	9	57.9	23742	216	3.63E-119	0.48438	0.57833	38322	99	0.43162	0.64836	52.47	99	0.96633	1076	30785	99
P23297	P23297	Protein S100-A1	S100A1	1	1	1	16	10546	94	5.38E-05	NaN	NaN	NaN	0	NaN	NaN	NaN	0	NaN	NaN	NaN	0
P23368	P23368	NAD-dependent malic enzyme, mitochondrial	ME2	1	17	9	38.9	65443	584	1.91E-108	0.62582	0.66359	40036	14	0.64629	0.63084	28477	14	0.86151	0.89421	30144	14
P23381	P23381	Tryptophan--tRNA ligase, cytoplasmic;T1-TrpRS;T2-TrpRS	WARS	1	19	8	48.6	53165	471	7.29E-185	26599	22302	58391	44	16359	23636	33294	44	0.94085	10158	43879	44
P23396	P23396	40S ribosomal protein S3	RPS3	1	20	1	77.8	26688	243	3.08E-110	0.72378	0.9175	30414	71	0.5826	0.83673	33554	71	0.90574	0.94156	37476	71
P23434;Q91WK5	P23434;Q91WK5	Glycine cleavage system H protein, mitochondrial	GCSH;Gcsh	2	2	2	17.3	18884	173	1.34E-73	0.5846	0.65764	82564	5	0.58601	0.78571	18312	5	0.96006	11403	20493	5
Q8BSK8;P23443	Q8BSK8;P23443	Ribosomal protein S6 kinase beta-1	Rps6kb1;RPS6KB1	2	2	2	5.3	59145	525	4.06E-06	0.52242	10547	27115	4	0.74282	12896	11.92	4	1329	1237	27159	4
P23458;P52332	P23458;P52332	Tyrosine-protein kinase JAK1	JAK1;Jak1	2	4	4	4.6	133.28	1154	1.36E-09	0.83551	13074	50321	4	0.81183	10807	30637	4	0.97149	0.75814	29.45	4
Q05909;P23470	Q05909;P23470	Receptor-type tyrosine-protein phosphatase gamma	Ptprg;PTPRG	2	4	4	3.2	161.24	1442	1.00E-10	NaN	NaN	NaN	1	NaN	NaN	NaN	1	NaN	NaN	NaN	1
P23492	P23492	Purine nucleoside phosphorylase	Pnp	1	10	9	46	32277	289	3.40E-39	NaN	NaN	NaN	0	NaN	NaN	NaN	0	NaN	NaN	NaN	0
P23497	P23497	Nuclear autoantigen Sp-100	SP100	1	10	5	14.1	100.42	879	5.60E-85	22497	23926	42943	2	18937	21789	39196	2	0.9005	10862	11837	2
P23508	P23508	Colorectal mutant cancer protein	MCC	1	4	4	9.7	93026	829	7.92E-14	0.46195	0.87398	15465	3	0.4694	0.77553	73994	3	10238	0.92159	76311	3
P23708;P23511	P23708;P23511	Nuclear transcription factor Y subunit alpha	Nfya;NFYA	2	2	2	11.6	36778	346	5.03E-11	0.72393	10548	39145	2	0.67834	0.82246	58965	2	0.95816	0.91081	17.68	2
P23526	P23526	Adenosylhomocysteinase	AHCY	1	23	3	44	47716	432	7.58E-126	14838	14935	34456	73	11931	14841	41867	73	0.90671	0.9813	35543	73
P23528	P23528	Cofilin-1	CFL1	1	14	1	71.1	18502	166	3.62E-118	11476	16139	47582	81	10713	1.45	60872	81	0.79903	0.92532	43304	81
P23588	P23588	Eukaryotic translation initiation factor 4B	EIF4B	1	18	8	29.6	69.15	611	6.78E-149	0.80728	10535	42019	31	0.69734	10634	42527	31	0.912	0.90715	31946	31
P23610;Q00558	P23610;Q00558	Factor VIII intron 22 protein	F8A1;F8a1	2	3	3	12.1	39103	371	4.30E-07	12701	11285	21332	2	17978	17581	54649	2	13973	15863	27947	2
P23634	P23634	Plasma membrane calcium-transporting ATPase 4	ATP2B4	1	11	3	12.1	137.92	1241	3.66E-32	0.74624	10247	42342	2	0.48211	0.62571	76763	2	0.72219	0.6885	32861	2
P23786	P23786	Carnitine O-palmitoyltransferase 2, mitochondrial	CPT2	1	14	12	28.6	73776	658	5.17E-51	11571	13363	30.06	11	11902	16927	24283	11	10768	1197	25079	11
P23919;P97930	P23919;P97930	Thymidylate kinase	DTYMK;Dtymk	2	8	8	37.3	23819	212	1.24E-19	0.49242	10487	16259	12	0.53051	10126	42697	12	1.1	0.99464	39519	12
P23921	P23921	Ribonucleoside-diphosphate reductase large subunit	RRM1	1	12	4	20.3	90069	792	6.63E-41	0.9468	13382	23.92	10	0.93518	12847	55058	10	0.80593	0.91185	47.59	10
P23953;Q64176;Q8VCC2	P23953	Carboxylesterase 1C	Ces1c	3	10	8	20	61055	554	2.44E-88	0.30326	0.48526	204.72	2	0.47075	0.78695	58218	2	11464	11766	77243	2
P24270	P24270	Catalase	Cat	1	12	9	32.1	59795	527	5.63E-46	NaN	NaN	NaN	0	NaN	NaN	NaN	0	NaN	NaN	NaN	0
P24369	P24369	Peptidyl-prolyl cis-trans isomerase B	Ppib	1	12	4	49.5	23713	216	3.24E-101	NaN	NaN	NaN	1	NaN	NaN	NaN	1	NaN	NaN	NaN	1
P24385;P25322;P30280	P24385	G1/S-specific cyclin-D1	CCND1	3	7	7	26.1	33729	295	6.66E-23	NaN	NaN	NaN	0	NaN	NaN	NaN	0	NaN	NaN	NaN	0
P24386;Q9QZD5;Q9QXG2	P24386	Rab proteins geranylgeranyltransferase component A 1	CHM	3	5	4	9.8	73475	653	1.15E-36	11615	10902	30311	6	0.95653	10258	53091	6	0.8918	10296	33842	6
P24452	P24452	Macrophage-capping protein	Capg	1	5	1	14.8	39.24	352	8.72E-36	NaN	NaN	NaN	0	NaN	NaN	NaN	0	NaN	NaN	NaN	0
P24527	P24527	Leukotriene A-4 hydrolase	Lta4h	1	14	5	27.5	69.05	611	4.43E-67	NaN	NaN	NaN	0	NaN	NaN	NaN	0	NaN	NaN	NaN	0
P24530;P48302	P24530	Endothelin B receptor	EDNRB	2	3	3	7.9	49643	442	8.14E-09	NaN	NaN	NaN	1	NaN	NaN	NaN	1	NaN	NaN	NaN	1
P24534	P24534	Elongation factor 1-beta	EEF1B2	1	11	4	55.6	24763	225	2.21E-92	11288	10629	30748	27	0.93706	0.95296	41153	27	0.83664	0.9803	24588	27
P24539	P24539	ATP synthase subunit b, mitochondrial	ATP5F1	1	9	6	38.7	28908	256	6.18E-106	0.99442	0.8787	26997	14	12383	11341	27415	14	11741	13534	17349	14
P24549	P24549	Retinal dehydrogenase 1	Aldh1a1	1	6	2	15.2	54467	501	1.76E-17	NaN	NaN	NaN	0	NaN	NaN	NaN	0	NaN	NaN	NaN	0
P24666;Q9D358	P24666;Q9D358	Low molecular weight phosphotyrosine protein phosphatase	ACP1;Acp1	2	8	8	60.1	18042	158	1.54E-63	0.71586	14045	18274	9	0.85294	15505	17721	9	10925	0.96009	19077	9
P24668	P24668	Cation-dependent mannose-6-phosphate receptor	M6pr	1	6	1	22.7	31172	278	1.17E-38	NaN	NaN	NaN	0	NaN	NaN	NaN	0	NaN	NaN	NaN	0
P24752	P24752	Acetyl-CoA acetyltransferase, mitochondrial	ACAT1	1	18	15	50.6	45199	427	2.32E-152	0.6728	0.9892	34413	37	0.78441	11192	34752	37	11525	11681	22586	37
Q9CQ19;P24844	Q9CQ19;P24844	Myosin regulatory light polypeptide 9	Myl9;MYL9	2	9	2	44.8	19854	172	1.19E-58	NaN	NaN	NaN	1	NaN	NaN	NaN	1	NaN	NaN	NaN	1
P24941;P97377;Q80YP0;Q00526	P24941;P97377	Cyclin-dependent kinase 2	CDK2;Cdk2	4	19	17	64.4	33929	298	1.99E-113	14965	1447	35881	42	14275	15645	39.95	42	10029	11306	19.86	42
P25054;Q61315	P25054	Adenomatous polyposis coli protein	APC	2	6	6	3.7	311.64	2843	2.83E-11	0.37182	0.73459	71366	3	0.42095	0.66377	12853	3	0.83601	0.67241	24944	3
Q99MK8;P25098;Q3UYH7;P35626	Q99MK8;P25098;Q3UYH7;P35626	Beta-adrenergic receptor kinase 1;Beta-adrenergic receptor kinase 2	Adrbk1;ADRBK1;Adrbk2;ADRBK2	4	2	2	3.3	79638	689	2.21E-05	NaN	NaN	NaN	1	NaN	NaN	NaN	1	NaN	NaN	NaN	1
P27573;P25189	P27573;P25189	Myelin protein P0	Mpz;MPZ	2	4	4	13.3	27621	248	7.90E-09	NaN	NaN	NaN	0	NaN	NaN	NaN	0	NaN	NaN	NaN	0
P25205	P25205	DNA replication licensing factor MCM3	MCM3	1	41	16	56.9	90.98	808	1.71E-274	0.71341	0.83597	31.1	62	0.59292	0.82233	39168	62	0.88979	10036	25721	62
P25206	P25206	DNA replication licensing factor MCM3	Mcm3	1	27	2	38.3	91545	812	7.36E-156	NaN	NaN	NaN	0	NaN	NaN	NaN	0	NaN	NaN	NaN	0
P63139;P25208	P63139;P25208	Nuclear transcription factor Y subunit beta	Nfyb;NFYB	2	1	1	8.2	22787	207	0.00065434	0.88076	11692	86779	2	0.74866	0.87557	59217	2	0.91818	0.89059	59443	2
P25325	P25325	3-mercaptopyruvate sulfurtransferase	MPST	1	5	5	25.9	33178	297	9.56E-35	1736	1338	30893	6	16048	11912	24986	6	10647	1124	71303	6
P25391;Q61789	P25391	Laminin subunit alpha-1	LAMA1	2	33	15	13.3	337.08	3075	1.17E-144	19851	38034	83369	5	23869	42668	80044	5	13902	12065	19565	5
P25398;P63323	P25398;P63323	40S ribosomal protein S12	RPS12;Rps12	2	8	8	54.5	14515	132	2.22E-49	0.92138	0.93185	20256	48	0.68104	0.87125	37222	48	0.86231	0.93328	32707	48
P25440;Q7JJ13;REV__Q7JJ13;REV__P25440	P25440;Q7JJ13	Bromodomain-containing protein 2	BRD2;Brd2	4	13	9	22.2	88.06	801	3.77E-31	0.41314	0.74792	26165	5	0.42669	0.69299	17355	5	10163	0.95409	9086	5
P25444	P25444	40S ribosomal protein S2	Rps2	1	14	1	43.7	31231	293	3.21E-82	NaN	NaN	NaN	0	NaN	NaN	NaN	0	NaN	NaN	NaN	0
P25445	P25445	Tumor necrosis factor receptor superfamily member 6	FAS	1	2	2	12.8	37732	335	2.20E-21	NaN	NaN	NaN	1	NaN	NaN	NaN	1	NaN	NaN	NaN	1
P25685;Q9QYJ3;Q9D832	P25685;Q9QYJ3	DnaJ homolog subfamily B member 1	DNAJB1;Dnajb1	3	14	13	35	38044	340	5.50E-80	0.67722	10924	57585	17	0.73156	12071	61604	17	0.99746	0.96919	33641	17
Q03265;P25705	Q03265;P25705	ATP synthase subunit alpha, mitochondrial	Atp5a1;ATP5A1	2	26	26	46.1	59752	553	1.05E-217	0.77655	1017	41074	125	0.8623	11511	43023	125	11316	11302	26739	125
P25774	P25774	Cathepsin S	CTSS	1	2	2	8.8	37495	331	2.46E-09	NaN	NaN	NaN	0	NaN	NaN	NaN	0	NaN	NaN	NaN	0
P25786	P25786	Proteasome subunit alpha type-1	PSMA1	1	14	3	52.1	29555	263	1.48E-117	13205	13621	31431	61	12042	14056	37.05	61	0.87075	0.9589	30842	61
P25787;P49722	P25787;P49722	Proteasome subunit alpha type-2	PSMA2;Psma2	2	9	9	49.1	25898	234	5.04E-51	13337	13202	23971	22	0.99519	11514	39722	22	0.88594	0.92605	33468	22
P25788;O70435	P25788;O70435	Proteasome subunit alpha type-3	PSMA3;Psma3	2	10	10	37.3	28433	255	5.83E-50	1.35	15031	35832	28	11203	13983	60152	29	10829	0.96368	44925	29
P25789	P25789	Proteasome subunit alpha type-4	PSMA4	1	11	1	55.6	29483	261	8.29E-111	11813	15236	19524	19	0.85982	13382	76188	19	0.85418	0.9682	65227	19
P25911	P25911	Tyrosine-protein kinase Lyn	Lyn	1	6	3	12.9	58812	512	7.97E-13	NaN	NaN	NaN	0	NaN	NaN	NaN	0	NaN	NaN	NaN	0
Q9Z1E3;P25963	Q9Z1E3;P25963	NF-kappa-B inhibitor alpha	Nfkbia;NFKBIA	2	1	1	6.1	35071	314	0.00076711	NaN	NaN	NaN	0	NaN	NaN	NaN	0	NaN	NaN	NaN	0
P26006;Q62470	P26006;Q62470	Integrin alpha-3;Integrin alpha-3 heavy chain;Integrin alpha-3 light chain	ITGA3;Itga3	2	3	3	3.7	116.61	1051	6.54E-07	0.59218	0.515	77992	2	0.76406	0.73183	38446	2	13772	1505	28123	2
P26038	P26038	Moesin	MSN	1	37	4	61	67819	577	4.41E-239	14173	16218	35328	105	1.03	1318	51.37	105	0.79256	0.84369	42954	105
P26039	P26039	Talin-1	Tln1	1	94	11	50.4	269.82	2541	0	NaN	NaN	NaN	0	NaN	NaN	NaN	0	NaN	NaN	NaN	0
P26041	P26041	Moesin	Msn	1	37	5	60.8	67766	577	5.79E-176	NaN	NaN	NaN	1	NaN	NaN	NaN	1	NaN	NaN	NaN	1
P26196;P54823	P26196;P54823	Probable ATP-dependent RNA helicase DDX6	DDX6;Ddx6	2	18	18	51.6	54416	483	6.90E-131	0.71268	0.98445	41338	30	0.67492	0.91442	54642	30	0.8973	0.96325	30472	30
Q61301;P26232	Q61301;P26232	Catenin alpha-2	Ctnna2;CTNNA2	2	10	2	12.8	105.28	953	4.17E-86	0.68221	0.71327	48332	2	NaN	NaN	NaN	1	0.82321	0.98549	17909	2
P26262	P26262	Plasma kallikrein;Plasma kallikrein heavy chain;Plasma kallikrein light chain	Klkb1	1	6	6	11.9	71382	638	1.69E-14	NaN	NaN	NaN	0	NaN	NaN	NaN	0	NaN	NaN	NaN	0
P26358	P26358	DNA (cytosine-5)-methyltransferase 1	DNMT1	1	26	21	20	183.16	1616	3.74E-96	0.48218	0.77352	35334	22	0.59865	0.82825	45831	22	11357	11436	32352	22
P26369;P26368	P26369;P26368	Splicing factor U2AF 65 kDa subunit	U2af2;U2AF2	2	9	9	33.5	53516	475	2.05E-84	0.60875	0.72341	20097	21	0.49687	0.61211	18414	21	0.8397	0.87522	15211	20
P26373;P47963	P26373;P47963	60S ribosomal protein L13	RPL13;Rpl13	2	7	7	28.9	24261	211	1.98E-49	0.47481	0.46848	40006	30	0.41574	0.4966	45909	30	0.95284	1.02	19931	30
P26374	P26374	Rab proteins geranylgeranyltransferase component A 2	CHML	1	2	1	4.1	74071	656	4.01E-05	NaN	NaN	NaN	0	NaN	NaN	NaN	0	NaN	NaN	NaN	0
P26440;Q9JHI5	P26440;Q9JHI5	Isovaleryl-CoA dehydrogenase, mitochondrial	IVD;Ivd	2	6	6	14.7	46319	423	3.72E-17	0.78901	0.60453	27327	6	0.84234	0.80945	20082	6	1055	11689	23326	6
P26443	P26443	Glutamate dehydrogenase 1, mitochondrial	Glud1	1	22	1	38.2	61336	558	1.36E-126	NaN	NaN	NaN	0	NaN	NaN	NaN	0	NaN	NaN	NaN	0
P27986;P26450;Q92569;Q64143	P27986;P26450	Phosphatidylinositol 3-kinase regulatory subunit alpha	PIK3R1;Pik3r1	4	4	3	6.2	83597	724	5.48E-10	0.98787	20845	28703	2	0.81375	15952	28083	2	0.84901	0.75025	0.6601	2
P26516;P51665	P26516;P51665	26S proteasome non-ATPase regulatory subunit 7	Psmd7;PSMD7	2	7	7	27.1	36539	321	7.51E-48	12351	11477	52228	21	11998	12821	78993	21	10433	1078	42435	21
P26572	P26572	Alpha-1,3-mannosyl-glycoprotein 2-beta-N-acetylglucosaminyltransferase	MGAT1	1	7	4	16	50878	445	6.77E-16	10178	18142	37183	5	0.96805	12831	35841	5	0.93248	0.78414	34526	5
P26583	P26583	High mobility group protein B2	HMGB2	1	6	2	28.2	24033	209	1.18E-30	12698	16769	43108	4	13144	1834	26.26	4	10351	10349	19892	4
P26599	P26599	Polypyrimidine tract-binding protein 1	PTBP1	1	14	7	37.5	57221	531	5.22E-131	0.67526	0.77081	30717	48	0.60576	0.79938	35286	49	0.9306	10281	26151	48
P26638	P26638	Serine--tRNA ligase, cytoplasmic	Sars	1	15	1	33.2	58388	512	1.55E-91	NaN	NaN	NaN	0	NaN	NaN	NaN	0	NaN	NaN	NaN	0
P26639	P26639	Threonine--tRNA ligase, cytoplasmic	TARS	1	35	14	52.3	83434	723	5.82E-208	1359	14042	34558	41	10358	15091	37943	41	10292	10287	20582	41
P26640;Q9Z1Q9	P26640;Q9Z1Q9	Valine--tRNA ligase	VARS;Vars	2	37	37	35.8	140.47	1264	6.83E-171	12883	12776	33.3	57	11011	1416	43167	57	10049	10429	30637	57
P26641	P26641	Elongation factor 1-gamma	EEF1G	1	26	8	54.5	50118	437	5.36E-169	0.9519	10894	32219	101	0.80286	0.99999	47665	101	0.86742	0.93448	35144	101
P26645	P26645	Myristoylated alanine-rich C-kinase substrate	Marcks	1	14	11	69.9	29661	309	4.39E-182	NaN	NaN	NaN	0	NaN	NaN	NaN	0	NaN	NaN	NaN	0
P62942;P26883	P62942;P26883	Peptidyl-prolyl cis-trans isomerase FKBP1A	FKBP1A;Fkbp1a	2	4	4	44.4	11951	108	4.06E-33	19544	20259	50407	8	13724	15705	77174	8	0.80635	0.87567	53116	8
P45878;P26885	P45878;P26885	Peptidyl-prolyl cis-trans isomerase FKBP2	Fkbp2;FKBP2	2	3	3	38.6	15344	140	2.32E-23	0.47389	0.88214	91781	3	0.41835	0.52616	22504	3	0.67643	0.66921	20652	3
P27005	P27005	Protein S100-A8	S100a8	1	1	1	22.5	10294	89	9.05E-26	NaN	NaN	NaN	0	NaN	NaN	NaN	0	NaN	NaN	NaN	0
P27038;P27037	P27038;P27037	Activin receptor type-2A	Acvr2a;ACVR2A	2	1	1	2.3	57889	513	1.68E-12	NaN	NaN	NaN	0	NaN	NaN	NaN	0	NaN	NaN	NaN	0
P27105;P54116	P27105	Erythrocyte band 7 integral membrane protein	STOM	2	11	11	55.6	31.73	288	3.13E-96	0.29229	0.4025	29258	5	0.27777	0.49457	30.61	5	11961	12354	26619	5
P27144	P27144	GTP:AMP phosphotransferase AK4, mitochondrial	AK4	1	4	4	15.2	25268	223	5.50E-10	31183	65045	90.13	5	17482	27904	11435	5	0.62103	0.48286	78965	5
P27348	P27348	14-3-3 protein theta	YWHAQ	1	16	3	62	27764	245	8.02E-296	13069	15529	34483	44	11247	16188	46613	44	0.8903	0.97915	32.97	44
P27361;Q63844	P27361;Q63844	Mitogen-activated protein kinase 3	MAPK3;Mapk3	2	10	7	27.2	43135	379	4.39E-30	10626	20176	40644	5	15151	18576	70275	5	11264	0.94612	68168	5
P27449	P27449	V-type proton ATPase 16 kDa proteolipid subunit	ATP6V0C	1	1	1	11.6	15736	155	0.0010087	NaN	NaN	NaN	1	NaN	NaN	NaN	1	NaN	NaN	NaN	1
P27487	P27487	Dipeptidyl peptidase 4;Dipeptidyl peptidase 4 membrane form;Dipeptidyl peptidase 4 soluble form	DPP4	1	17	13	26	88278	766	3.67E-68	21417	20965	28897	10	21046	19614	37632	10	11062	12087	27874	10
P27540;P53762	P27540;P53762	Aryl hydrocarbon receptor nuclear translocator	ARNT;Arnt	2	2	2	4.7	86636	789	1.01E-05	NaN	NaN	NaN	1	NaN	NaN	NaN	1	NaN	NaN	NaN	1
P27544	P27544	Ceramide synthase 1	CERS1	1	1	1	4	39536	350	0.0013337	NaN	NaN	NaN	0	NaN	NaN	NaN	0	NaN	NaN	NaN	0
P27546	P27546	Microtubule-associated protein 4	Map4	1	14	11	18.9	117.43	1125	8.99E-64	NaN	NaN	NaN	0	NaN	NaN	NaN	0	NaN	NaN	NaN	0
Q6ZWV3;P27635;P86048;Q96L21	Q6ZWV3;P27635;P86048	60S ribosomal protein L10;60S ribosomal protein L10-like	Rpl10;RPL10;Rpl10l	4	13	13	58.4	24604	214	2.44E-70	0.63122	0.58244	35195	39	0.49908	0.57236	40888	40	0.85454	0.92471	30937	39
P27659;Q92901	P27659	60S ribosomal protein L3	Rpl3	2	15	1	38	46109	403	3.85E-74	NaN	NaN	NaN	0	NaN	NaN	NaN	0	NaN	NaN	NaN	0
P27694;Q8VEE4	P27694	Replication protein A 70 kDa DNA-binding subunit	RPA1	2	21	21	35.9	68137	616	1.21E-103	10049	1043	45.87	29	0.66863	0.91898	55446	29	0.82391	0.98495	34023	29
P27695	P27695	DNA-(apurinic or apyrimidinic site) lyase;DNA-(apurinic or apyrimidinic site) lyase, mitochondrial	APEX1	1	13	6	52.8	35554	318	2.98E-121	10137	10321	47745	36	0.82149	11657	61277	36	0.87847	0.98434	39056	36
P27707;P43346	P27707;P43346	Deoxycytidine kinase	DCK;Dck	2	7	7	32.3	30518	260	1.04E-26	29151	28904	96644	9	26742	29366	69519	9	0.93709	10395	30029	9
P27708;Q8C196;P31327	P27708	CAD protein;Glutamine-dependent carbamoyl-phosphate synthase;Aspartate carbamoyltransferase;Dihydroorotase	CAD	3	29	29	18	242.98	2225	6.00E-142	13004	1174	32734	21	10275	10905	35788	21	0.88867	0.96743	20989	21
P27773	P27773	Protein disulfide-isomerase A3	Pdia3	1	31	13	61.4	56678	505	4.81E-165	0.69868	0.9475	32.65	55	0.72544	0.97986	29.86	55	10622	10946	19135	55
P27782;Q9UJU2;Q00417;Q924A0;Q9NQB0	P27782;Q9UJU2;Q00417;Q924A0;Q9NQB0	Lymphoid enhancer-binding factor 1;Transcription factor 7;Transcription factor 7-like 2	Lef1;LEF1;Tcf7;Tcf7l2;TCF7L2	5	2	1	7.8	44058	397	1.60E-05	NaN	NaN	NaN	1	NaN	NaN	NaN	1	NaN	NaN	NaN	1
P27797	P27797	Calreticulin	CALR	1	23	8	57.1	48141	417	4.99E-174	0.50988	0.54952	32462	131	0.51941	0.58745	47261	131	0.97278	11126	41781	131
P27808	P27808	Alpha-1,3-mannosyl-glycoprotein 2-beta-N-acetylglucosaminyltransferase	Mgat1	1	5	2	12.3	51.69	447	6.69E-11	NaN	NaN	NaN	0	NaN	NaN	NaN	0	NaN	NaN	NaN	0
P27816	P27816	Microtubule-associated protein 4	MAP4	1	40	37	44.4	121	1152	8.43E-262	14987	15767	28615	68	1249	16718	26.88	68	0.86429	10318	24.08	68
P27824	P27824	Calnexin	CANX	1	30	19	42.9	67567	592	3.83E-160	0.42267	0.42835	82885	97	0.49208	0.65003	55852	97	1.46	16841	57754	97
P27870;P15498	P27870;P15498	Proto-oncogene vav	Vav1;VAV1	2	7	6	9.5	98136	845	7.45E-19	NaN	NaN	NaN	0	NaN	NaN	NaN	0	NaN	NaN	NaN	0
P27987	P27987	Inositol-trisphosphate 3-kinase B	ITPKB	1	6	6	8.8	102.38	946	7.17E-22	0.69629	10835	4163	4	0.64994	0.97538	38612	4	0.87568	0.85621	47941	4
P28062	P28062	Proteasome subunit beta type-8	PSMB8	1	8	6	31.9	30354	276	7.96E-41	31854	27837	62956	10	21306	25633	24137	10	0.81855	0.91557	37831	11
P28065;P28076	P28065	Proteasome subunit beta type-9	PSMB9	2	4	4	25.6	23264	219	1.35E-07	NaN	NaN	NaN	1	NaN	NaN	NaN	1	NaN	NaN	NaN	1
Q9Z2U1;P28066	Q9Z2U1;P28066	Proteasome subunit alpha type-5	Psma5;PSMA5	2	10	10	49	26411	241	1.04E-135	13999	14818	15.58	33	1.06	14194	26343	33	0.87286	0.95989	27.38	33
P28070;P99026	P28070;P99026	Proteasome subunit beta type-4	PSMB4;Psmb4	2	7	7	37.5	29204	264	3.84E-60	0.99567	15025	25887	8	10676	14296	26821	8	0.99267	10477	22661	8
P28072;Q60692	P28072;Q60692	Proteasome subunit beta type-6	PSMB6;Psmb6	2	3	3	13	25357	239	4.37E-10	12734	15867	23609	4	0.94817	12956	20896	4	0.95293	0.8842	23541	4
P28074;O55234	P28074;O55234	Proteasome subunit beta type-5	PSMB5;Psmb5	2	14	14	49.8	28.48	263	5.11E-85	0.46717	0.95742	50.49	22	0.53498	0.88171	39807	22	10259	0.97345	13617	22
P28161	P28161	Glutathione S-transferase Mu 2	GSTM2	1	6	3	33.9	25744	218	5.19E-16	0.63846	1241	75245	7	0.76683	15893	80584	7	0.99996	0.94315	19121	7
P28271	P28271	Cytoplasmic aconitate hydratase	Aco1	1	14	3	20.7	98124	889	1.23E-57	NaN	NaN	NaN	0	NaN	NaN	NaN	0	NaN	NaN	NaN	0
P28288;P55096	P28288;P55096	ATP-binding cassette sub-family D member 3	ABCD3;Abcd3	2	11	11	22.8	75475	659	2.70E-40	0.29448	0.46886	33422	9	0.28127	0.31814	26055	9	0.79259	0.79928	18748	9
P43268;P28322	P43268;P28322	ETS translocation variant 4	ETV4;Etv4	2	1	1	4.5	53938	484	5.06E-06	NaN	NaN	NaN	0	NaN	NaN	NaN	0	NaN	NaN	NaN	0
P28331	P28331	NADH-ubiquinone oxidoreductase 75 kDa subunit, mitochondrial	NDUFS1	1	28	10	51.7	79467	727	2.70E-116	10245	12147	32194	28	13213	14111	33.59	28	11345	12698	35229	28
P28340	P28340	DNA polymerase delta catalytic subunit	POLD1	1	18	8	20.7	123.63	1107	3.79E-43	0.92242	10564	19798	8	0.83369	10256	14488	8	0.88541	0.96375	14895	8
P30051;P28347	P30051;P28347	Transcriptional enhancer factor TEF-1	Tead1;TEAD1	2	2	1	6.8	47947	426	1.36E-06	NaN	NaN	NaN	1	NaN	NaN	NaN	1	NaN	NaN	NaN	1
P28352	P28352	DNA-(apurinic or apyrimidinic site) lyase;DNA-(apurinic or apyrimidinic site) lyase, mitochondrial	Apex1	1	9	2	36.6	35.49	317	6.19E-62	16738	14276	39052	3	13918	10968	10394	3	0.8706	0.93136	21976	3
P28370;Q6PGB8	P28370;Q6PGB8	Probable global transcription activator SNF2L1	SMARCA1;Smarca1	2	17	6	15.7	122.6	1054	1.54E-42	0.67886	0.7493	56.71	4	0.89697	11174	59173	4	11477	1254	35.63	4
P63085;P28482	P63085;P28482	Mitogen-activated protein kinase 1	Mapk1;MAPK1	2	11	8	32.7	41275	358	4.11E-46	11575	13809	53482	19	11472	1584	41161	19	0.89414	0.98469	28832	19
P61244;P28574	P61244;P28574	Protein max	MAX;Max	2	4	4	31.9	18275	160	1.85E-24	0.4244	0.68889	35344	2	0.4522	0.70171	25151	2	11013	11101	24886	2
P28650;Q8N142	P28650;Q8N142	Adenylosuccinate synthetase isozyme 1	Adssl1;ADSSL1	2	7	4	19	50254	457	1.15E-17	NaN	NaN	NaN	0	NaN	NaN	NaN	0	NaN	NaN	NaN	0
P35219;P28651	P35219;P28651	Carbonic anhydrase-related protein	CA8;Ca8	2	3	3	17.2	32973	290	1.58E-22	16745	1571	40699	4	15096	15246	72.93	4	0.86994	0.96574	22343	4
P28652;Q13554	P28652;Q13554	Calcium/calmodulin-dependent protein kinase type II subunit beta	Camk2b;CAMK2B	2	3	1	8.1	60.46	542	3.30E-10	NaN	NaN	NaN	0	NaN	NaN	NaN	0	NaN	NaN	NaN	0
P28653;P21810	P28653;P21810	Biglycan	Bgn;BGN	2	10	9	28.2	41639	369	1.34E-58	10728	11442	246.94	2	38169	42494	363.15	2	0.37561	0.41227	133.13	2
P28654;P07585	P28654	Decorin	Dcn	2	11	10	36.7	39809	354	3.94E-50	NaN	NaN	NaN	0	NaN	NaN	NaN	0	NaN	NaN	NaN	0
P28656	P28656	Nucleosome assembly protein 1-like 1	Nap1l1	1	9	1	29.9	45345	391	1.49E-116	NaN	NaN	NaN	0	NaN	NaN	NaN	0	NaN	NaN	NaN	0
Q92879;P28659	Q92879;P28659	CUGBP Elav-like family member 1	CELF1;Celf1	2	10	7	22.2	52063	486	1.64E-31	0.42208	0.61257	11636	4	0.57565	0.76477	61539	4	10373	11539	61.35	4
Q9Y2A7;P28660	Q9Y2A7;P28660	Nck-associated protein 1	NCKAP1;Nckap1	2	17	17	17.8	128.79	1128	4.40E-60	13106	14046	30022	16	0.99392	13955	50342	16	0.85462	0.93153	29997	16
P28665;P28666	P28665;P28666	Murinoglobulin-1;Murinoglobulin-2	Mug1;Mug2	2	44	43	36	165.3	1476	0	38577	59592	51497	4	15863	23318	42779	4	0.42652	0.4205	92845	4
P28676;Q8VC88	P28676;Q8VC88	Grancalcin	GCA;Gca	2	2	2	8.3	24.01	217	0.00015717	NaN	NaN	NaN	1	NaN	NaN	NaN	1	NaN	NaN	NaN	1
P28702;P19793;P48443;P28705;P28700;P28704	P28702;P19793;P48443;P28705;P28700;P28704	Retinoic acid receptor RXR-beta;Retinoic acid receptor RXR-alpha;Retinoic acid receptor RXR-gamma	RXRB;RXRA;RXRG;Rxrg;Rxra;Rxrb	6	4	3	9.8	56921	533	8.35E-10	0.40553	0.73483	14.41	3	0.56612	0.93645	39146	3	0.58965	0.68374	49992	3
P28715;P35689	P28715	DNA repair protein complementing XP-G cells	ERCC5	2	6	6	6.7	133.11	1186	8.15E-38	0.93398	0.84614	15792	3	0.63112	0.68626	46459	3	0.68534	0.79447	70751	3
Q9Y496;P28741;Q6ZMV9	Q9Y496;P28741	Kinesin-like protein KIF3A	KIF3A;Kif3a	3	5	4	10.2	80.04	699	8.96E-11	0.85515	16632	14908	2	0.79236	14804	12006	2	0.97133	0.92053	31.56	2
P28798	P28798	Granulins;Acrogranin;Granulin-1;Granulin-2;Granulin-3;Granulin-4;Granulin-5;Granulin-6;Granulin-7	Grn	1	11	10	36	63458	589	6.38E-84	0.93193	10398	10481	2	0.92907	10869	21734	2	10215	1044	27.41	2
P28799	P28799	Granulins;Acrogranin;Paragranulin;Granulin-1;Granulin-2;Granulin-3;Granulin-4;Granulin-5;Granulin-6;Granulin-7	GRN	1	10	9	23.6	63544	593	3.91E-42	0.92451	12012	41372	10	0.99026	14848	38466	10	10877	12225	12751	10
P28828;P28827;O14522;Q99M80	P28828;P28827	Receptor-type tyrosine-protein phosphatase mu	Ptprm;PTPRM	4	3	3	3.4	163.65	1452	1.23E-10	NaN	NaN	NaN	1	NaN	NaN	NaN	1	NaN	NaN	NaN	1
P28838	P28838	Cytosol aminopeptidase	LAP3	1	26	16	60.5	56166	519	1.67E-177	25293	26265	43798	53	19845	25014	50592	53	0.82803	0.93283	45043	53
P28867	P28867	Protein kinase C delta type;Protein kinase C delta type regulatory subunit;Protein kinase C delta type catalytic subunit	Prkcd	1	6	2	11.4	77546	674	2.80E-17	0.77673	0.8712	16469	2	0.68903	0.83964	65343	2	0.8919	0.97972	14447	2
P29083;Q9D0D5	P29083;Q9D0D5	General transcription factor IIE subunit 1	GTF2E1;Gtf2e1	2	6	6	21.2	49452	439	2.10E-14	NaN	NaN	NaN	0	NaN	NaN	NaN	0	NaN	NaN	NaN	0
P29084;Q9D902	P29084	Transcription initiation factor IIE subunit beta	GTF2E2	2	3	3	10.3	33043	291	7.29E-07	0.44677	0.6753	30279	2	0.4428	0.68539	29652	2	0.96087	10052	73435	2
P29144	P29144	Tripeptidyl-peptidase 2	TPP2	1	22	11	23.4	138.35	1249	1.40E-134	0.74226	0.86993	19838	25	0.69383	0.8487	42341	25	0.8683	0.97373	43596	25
P29218	P29218	Inositol monophosphatase 1	IMPA1	1	11	10	46.9	30188	277	1.10E-62	12337	1577	38066	16	1043	15304	28.68	16	0.943	0.95565	59592	16
P29341;Q4VXU2;Q96DU9	P29341	Polyadenylate-binding protein 1	Pabpc1	3	25	1	41.8	70.67	636	4.75E-209	NaN	NaN	NaN	0	NaN	NaN	NaN	0	NaN	NaN	NaN	0
P29351;P29350	P29351	Tyrosine-protein phosphatase non-receptor type 6	Ptpn6	2	15	15	32.3	67558	595	3.30E-46	NaN	NaN	NaN	1	NaN	NaN	NaN	1	NaN	NaN	NaN	1
P98083;P29353;Q61120;Q8BMC3;P98077	P98083;P29353;Q61120;Q8BMC3;P98077	SHC-transforming protein 1;SHC-transforming protein 3;SHC-transforming protein 2	Shc1;SHC1;Shc3;Shc2;SHC2	5	2	2	4.3	62607	579	2.43E-11	2136	19263	18765	2	15623	14785	10701	2	0.71265	0.81869	72334	2
Q3UXZ9;P29375	Q3UXZ9;P29375	Lysine-specific demethylase 5A	Kdm5a;KDM5A	2	1	1	0.7	192.21	1690	0.0015015	NaN	NaN	NaN	1	NaN	NaN	NaN	1	NaN	NaN	NaN	1
Q9HAV0;P29387	Q9HAV0;P29387	Guanine nucleotide-binding protein subunit beta-4	GNB4;Gnb4	2	9	5	36.5	37567	340	1.69E-70	0.82456	0.98967	37557	6	1013	10014	71.45	6	11567	1.16	44756	6
P29401	P29401	Transketolase	TKT	1	24	12	39.5	67877	623	7.29E-212	16227	15276	45725	120	13198	15205	44.41	120	0.8971	0.97716	25109	119
P29416	P29416	Beta-hexosaminidase subunit alpha	Hexa	1	6	2	12.3	60612	528	1.56E-35	NaN	NaN	NaN	0	NaN	NaN	NaN	0	NaN	NaN	NaN	0
P29452	P29452	Caspase-1;Caspase-1 subunit p20;Caspase-1 subunit p10	Casp1	1	4	4	16.4	45.64	402	2.82E-10	NaN	NaN	NaN	0	NaN	NaN	NaN	0	NaN	NaN	NaN	0
P29558;Q91W59;Q8VC70;Q15434;Q8BWL5;Q6XE24	P29558;Q91W59	RNA-binding motif, single-stranded-interacting protein 1	RBMS1;Rbms1	6	4	4	13.1	44505	406	2.75E-10	NaN	NaN	NaN	1	NaN	NaN	NaN	1	NaN	NaN	NaN	1
P29590	P29590	Protein PML	PML	1	16	16	21.3	97.55	882	7.29E-60	14561	12792	27973	18	15691	14715	25401	18	0.88952	0.96878	39.01	18
Q15843;P29595	Q15843;P29595	NEDD8	NEDD8;Nedd8	2	3	3	28.4	90714	81	2.35E-24	0.6266	12971	88106	8	0.86808	14997	79152	8	12209	10955	13826	8
P29597;Q9R117	P29597;Q9R117	Non-receptor tyrosine-protein kinase TYK2	TYK2;Tyk2	2	2	2	2.4	133.65	1187	1.04E-05	NaN	NaN	NaN	0	NaN	NaN	NaN	0	NaN	NaN	NaN	0
P29692	P29692	Elongation factor 1-delta	EEF1D	1	19	9	79	31121	281	5.02E-222	10203	11965	33963	52	0.91041	11292	43991	52	0.93673	0.98321	25019	51
P29699	P29699	Alpha-2-HS-glycoprotein	Ahsg	1	7	6	32.2	37325	345	4.05E-56	NaN	NaN	NaN	0	NaN	NaN	NaN	0	NaN	NaN	NaN	0
P29728	P29728	2-5-oligoadenylate synthase 2	OAS2	1	4	4	5.7	82.43	719	6.52E-09	NaN	NaN	NaN	0	NaN	NaN	NaN	0	NaN	NaN	NaN	0
P29758	P29758	Ornithine aminotransferase, mitochondrial	Oat	1	5	1	15.9	48354	439	3.01E-61	NaN	NaN	NaN	0	NaN	NaN	NaN	0	NaN	NaN	NaN	0
P29788;Q8BP99	P29788	Vitronectin	Vtn	2	13	12	33.7	54848	478	3.27E-82	NaN	NaN	NaN	0	NaN	NaN	NaN	0	NaN	NaN	NaN	0
P29966	P29966	Myristoylated alanine-rich C-kinase substrate	MARCKS	1	14	11	64.2	31554	332	2.33E-222	0.7678	0.97671	27266	47	0.77693	0.97842	24285	47	0.98751	11199	23405	47
P29992;P21278;P30677;O95837	P29992;P21278	Guanine nucleotide-binding protein subunit alpha-11	GNA11;Gna11	4	7	4	23.4	42123	359	1.04E-16	0.45175	0.5963	39229	2	0.29774	0.39462	15.98	2	0.63349	0.64648	28196	2
P30038;Q8CHT0	P30038	Delta-1-pyrroline-5-carboxylate dehydrogenase, mitochondrial	ALDH4A1	2	9	9	22.6	61719	563	7.04E-29	13228	11861	44949	9	11731	15293	43088	9	10062	10962	29762	9
P30040	P30040	Endoplasmic reticulum resident protein 29	ERP29	1	12	8	47.1	28993	261	1.68E-67	0.33051	0.49893	27499	31	0.32245	0.45245	47127	31	0.92558	10241	33785	31
P30041	P30041	Peroxiredoxin-6	PRDX6	1	19	14	67	25035	224	4.78E-97	1667	15174	36638	42	12036	13416	74655	42	0.79728	0.9279	63327	42
P30042	P30042	ES1 protein homolog, mitochondrial	C21orf33	1	7	4	36.6	28.17	268	5.94E-26	0.57678	0.95203	24811	10	0.49871	0.91102	95336	10	0.96313	10459	19681	10
P30043	P30043	Flavin reductase (NADPH)	BLVRB	1	7	5	48.1	22119	206	1.28E-38	0.91955	17732	27242	11	1373	19185	42749	11	10517	1109	26688	11
P30044	P30044	Peroxiredoxin-5, mitochondrial	PRDX5	1	11	6	46.7	22086	214	2.80E-118	21122	15237	34601	21	19957	1532	76668	21	0.93767	10661	44523	21
P30046;A6NHG4	P30046;A6NHG4	D-dopachrome decarboxylase;D-dopachrome decarboxylase-like protein	DDT;DDTL	2	7	7	57.6	12712	118	1.55E-26	25639	26334	33685	13	21614	27975	57582	13	0.89011	10344	33947	13
P30048;P20108	P30048	Thioredoxin-dependent peroxide reductase, mitochondrial	PRDX3	2	9	9	43	27692	256	1.08E-68	0.83415	0.93598	33007	50	0.92302	11927	46924	50	11382	1237	33.72	50
P30049	P30049	ATP synthase subunit delta, mitochondrial	ATP5D	1	3	2	17.3	17.49	168	3.50E-15	0.54294	0.93174	88284	7	0.59967	10433	23378	7	10141	10992	15278	6
P35979;P30050	P35979;P30050	60S ribosomal protein L12	Rpl12;RPL12	2	7	7	58.8	17804	165	3.83E-91	0.76859	0.99534	27092	41	0.62285	0.89543	28949	41	0.80398	0.90987	23278	41
P30084	P30084	Enoyl-CoA hydratase, mitochondrial	ECHS1	1	13	9	61.4	31387	290	1.24E-153	0.86259	0.86102	20.05	32	0.89214	10889	35677	32	11185	11685	27019	32
P30085	P30085	UMP-CMP kinase	CMPK1	1	8	2	54.1	22222	196	7.03E-37	18308	20702	46386	15	1603	18097	65075	15	0.86467	0.98878	37214	15
P30086;Q8VIN1	P30086	Phosphatidylethanolamine-binding protein 1;Hippocampal cholinergic neurostimulating peptide	PEBP1	2	12	7	81.3	21057	187	8.64E-157	25401	22165	33044	67	19557	20448	62789	67	0.84815	0.9427	51115	67
P30101	P30101	Protein disulfide-isomerase A3	PDIA3	1	30	12	60	56782	505	6.83E-250	0.56162	0.64215	26321	55	0.57061	0.68604	27096	55	10474	11601	26271	54
P30153;Q76MZ3	P30153;Q76MZ3	Serine/threonine-protein phosphatase 2A 65 kDa regulatory subunit A alpha isoform	PPP2R1A;Ppp2r1a	2	23	18	45.2	65308	589	9.28E-140	10678	12878	30.05	48	10426	13434	37067	48	0.90676	0.98555	25668	48
P30260;A2A6Q5	P30260;A2A6Q5	Cell division cycle protein 27 homolog	CDC27;Cdc27	2	6	6	10.8	91866	824	1.63E-16	0.65661	0.79343	59285	2	0.81724	10475	42779	2	14448	14369	21179	2
P30405;Q99KR7	P30405;Q99KR7	Peptidyl-prolyl cis-trans isomerase F, mitochondrial	PPIF;Ppif	2	10	9	64.3	22.04	207	8.48E-73	0.49753	0.79182	37991	12	0.64537	0.98208	34.29	12	10996	11708	20814	12
P30412	P30412	Peptidyl-prolyl cis-trans isomerase C	Ppic	1	2	1	11.8	22794	212	4.22E-08	NaN	NaN	NaN	0	NaN	NaN	NaN	0	NaN	NaN	NaN	0
P30414	P30414	NK-tumor recognition protein;Putative peptidyl-prolyl cis-trans isomerase	NKTR	1	4	4	4.5	165.67	1462	1.02E-10	0.45439	0.9185	38997	2	0.43325	0.74856	64589	2	10274	0.86501	9938	2
P30419;O70310;O70311	P30419;O70310	Glycylpeptide N-tetradecanoyltransferase 1	NMT1;Nmt1	3	16	13	36.3	56806	496	3.81E-92	0.91242	10262	33077	29	0.70463	0.91343	45362	30	0.93007	0.99383	28893	28
P30455;P30443	P30455;P30443	HLA class I histocompatibility antigen, A-36 alpha chain;HLA class I histocompatibility antigen, A-1 alpha chain	HLA-A	2	13	2	40.5	40933	365	2.30E-89	12656	11875	59811	19	10523	13196	42619	19	0.98677	10974	31928	19
P30480;P30460;P30462;Q29836;P30475	P30480;P30460;P30462;Q29836;P30475	HLA class I histocompatibility antigen, B-42 alpha chain;HLA class I histocompatibility antigen, B-8 alpha chain;HLA class I histocompatibility antigen, B-14 alpha chain;HLA class I histocompatibility antigen, B-67 alpha chain;HLA class I histocompatibility antigen, B-39 alpha chain	HLA-B	5	10	0	29	40332	362	2.54E-59	NaN	NaN	NaN	0	NaN	NaN	NaN	0	NaN	NaN	NaN	0
P30501	P30501	HLA class I histocompatibility antigen, Cw-2 alpha chain	HLA-C	1	9	2	27	41094	366	3.67E-61	NaN	NaN	NaN	0	NaN	NaN	NaN	0	NaN	NaN	NaN	0
P30508;Q29960;P30505;Q07000;Q95604;P04222	P30508;Q29960;P30505;Q07000;Q95604	HLA class I histocompatibility antigen, Cw-12 alpha chain;HLA class I histocompatibility antigen, Cw-16 alpha chain;HLA class I histocompatibility antigen, Cw-8 alpha chain;HLA class I histocompatibility antigen, Cw-15 alpha chain;HLA class I histocompatibility antigen, Cw-17 alpha chain	HLA-C	6	11	0	34.4	40885	366	4.01E-70	39963	26971	25546	2	51835	33883	23788	2	11392	12023	12817	2
P30519	P30519	Heme oxygenase 2	HMOX2	1	5	4	18.4	36032	316	1.16E-15	0.50453	0.91681	77523	3	0.55256	10134	62324	3	10442	0.98421	27358	3
P30520;P46664	P30520;P46664	Adenylosuccinate synthetase isozyme 2	ADSS;Adss	2	16	13	43.2	50097	456	3.56E-57	0.8287	16875	49007	14	11337	1467	77386	14	0.8658	0.96448	51162	14
P30533	P30533	Alpha-2-macroglobulin receptor-associated protein	LRPAP1	1	17	14	44	41465	357	1.07E-89	0.81539	0.90702	39226	45	0.92433	10238	52719	45	11487	12534	36918	45
P30566	P30566	Adenylosuccinate lyase	ADSL	1	13	9	31.8	54889	484	1.21E-76	0.55835	11159	26817	9	0.71545	11603	17306	9	10952	10653	24371	9
P30622;Q922J3	P30622;Q922J3	CAP-Gly domain-containing linker protein 1	CLIP1;Clip1	2	17	16	14.1	162.24	1438	5.29E-67	0.80539	13228	18576	11	0.80851	15011	26193	11	0.92671	10139	18964	11
P30626	P30626	Sorcin	SRI	1	11	1	50.5	21676	198	6.43E-38	20411	25683	25523	10	14933	2032	71501	10	0.81797	0.94012	70934	10
P30681	P30681	High mobility group protein B2	Hmgb2	1	6	2	31.9	24162	210	1.77E-28	22934	22004	36727	8	11137	14973	51511	8	0.60396	0.68266	12741	8
P30740	P30740	Leukocyte elastase inhibitor	SERPINB1	1	12	11	38	42741	379	6.88E-39	0.96003	19182	34762	8	0.98934	19091	37.85	8	0.93832	10119	17893	8
P30825	P30825	High affinity cationic amino acid transporter 1	SLC7A1	1	5	4	10	67638	629	6.78E-20	NaN	NaN	NaN	1	NaN	NaN	NaN	1	NaN	NaN	NaN	1
P30837;P47895	P30837	Aldehyde dehydrogenase X, mitochondrial	ALDH1B1	2	16	6	36.6	57206	517	4.65E-81	0.90572	0.82527	40079	15	0.89853	10185	72613	15	10738	12279	94528	15
Q8CFI7;P30876	Q8CFI7;P30876	DNA-directed RNA polymerase II subunit RPB2	Polr2b;POLR2B	2	28	28	29.9	133.91	1174	1.58E-125	0.75431	0.7981	58309	26	0.674	0.72575	49497	25	0.94231	0.97081	35567	26
P30999	P30999	Catenin delta-1	Ctnnd1	1	22	1	28	104.92	938	6.01E-82	NaN	NaN	NaN	0	NaN	NaN	NaN	0	NaN	NaN	NaN	0
P31040	P31040	Succinate dehydrogenase [ubiquinone] flavoprotein subunit, mitochondrial	SDHA	1	20	9	45	72691	664	2.14E-142	0.83374	14088	40426	40	0.84832	12766	30925	40	11096	11522	32499	40
P31150;P50396	P31150;P50396	Rab GDP dissociation inhibitor alpha	GDI1;Gdi1	2	21	14	56.6	50582	447	3.40E-195	15846	21782	18998	15	13376	1721	31795	15	0.90589	0.90119	35413	15
Q3THS6;P31153;Q00266;Q91X83	Q3THS6;P31153	S-adenosylmethionine synthase isoform type-2	Mat2a;MAT2A	4	17	17	44.1	43688	395	5.82E-80	13747	1059	19284	46	11618	11319	27524	46	0.89061	0.97593	21.82	46
Q06330;P31266	Q06330;P31266	Recombining binding protein suppressor of hairless	RBPJ;Rbpj	2	4	4	9.8	55637	500	6.62E-09	NaN	NaN	NaN	1	NaN	NaN	NaN	1	NaN	NaN	NaN	1
P31321	P31321	cAMP-dependent protein kinase type I-beta regulatory subunit	PRKAR1B	1	6	1	22	43072	381	8.11E-22	NaN	NaN	NaN	1	NaN	NaN	NaN	1	NaN	NaN	NaN	1
P31350;P11157;Q6PEE3	P31350	Ribonucleoside-diphosphate reductase subunit M2	RRM2	3	11	9	33.4	44877	389	1.08E-35	10266	13982	58.81	10	0.84169	12057	99076	10	0.74452	0.8331	55.62	10
P52912;P31483	P52912;P31483	Nucleolysin TIA-1;Nucleolysin TIA-1 isoform p40	Tia1;TIA1	2	5	2	14.2	42799	386	5.81E-35	0.92993	10595	10032	3	0.73705	0.84438	26661	3	0.78249	0.88834	27258	3
P31532	P31532	Serum amyloid A-4 protein	Saa4	1	3	3	33.1	15088	130	1.30E-17	NaN	NaN	NaN	0	NaN	NaN	NaN	0	NaN	NaN	NaN	0
P31689;P63037	P31689;P63037	DnaJ homolog subfamily A member 1	DNAJA1;Dnaja1	2	10	10	34.3	44868	397	2.82E-72	0.57081	0.96354	31356	16	0.6221	11132	35584	16	11941	11055	18155	16
P31725	P31725	Protein S100-A9	S100a9	1	4	4	31	13049	113	3.35E-60	NaN	NaN	NaN	0	NaN	NaN	NaN	0	NaN	NaN	NaN	0
P31750;P31749	P31750;P31749	RAC-alpha serine/threonine-protein kinase	Akt1;AKT1	2	3	3	7.5	55707	480	5.84E-07	NaN	NaN	NaN	0	NaN	NaN	NaN	0	NaN	NaN	NaN	0
Q60823;P31751	Q60823;P31751	RAC-beta serine/threonine-protein kinase	Akt2;AKT2	2	6	6	18.7	55741	481	1.74E-20	12202	26001	40564	5	0.93082	1768	30.66	5	0.98103	0.85151	12792	5
P31786	P31786	Acyl-CoA-binding protein	Dbi	1	3	3	48.3	10	87	2.08E-58	NaN	NaN	NaN	0	NaN	NaN	NaN	0	NaN	NaN	NaN	0
P31930	P31930	Cytochrome b-c1 complex subunit 1, mitochondrial	UQCRC1	1	17	10	51	52645	480	9.56E-210	1118	12929	21743	66	12602	13905	32764	67	11438	12309	34522	67
P31937	P31937	3-hydroxyisobutyrate dehydrogenase, mitochondrial	HIBADH	1	8	5	36.6	35329	336	2.14E-73	10127	11377	20297	9	0.98373	11926	31028	9	0.95721	11734	31427	9
Q02750;P31938	Q02750;P31938	Dual specificity mitogen-activated protein kinase kinase 1	MAP2K1;Map2k1	2	9	5	25.4	43439	393	2.24E-23	0.87571	14018	29001	5	0.79129	13689	47472	5	0.81104	10131	46268	5
P31939	P31939	Bifunctional purine biosynthesis protein PURH;Phosphoribosylaminoimidazolecarboxamide formyltransferase;IMP cyclohydrolase	ATIC	1	33	24	69.4	64615	592	8.02E-209	19655	19602	26522	64	16856	20878	36447	64	0.9405	10216	27268	64
P31942	P31942	Heterogeneous nuclear ribonucleoprotein H3	HNRNPH3	1	13	11	48.8	36926	346	5.14E-165	0.42232	0.73422	23565	23	0.53126	0.86527	34157	23	10895	11648	22302	23
P31943;O35737	P31943;O35737	Heterogeneous nuclear ribonucleoprotein H;Heterogeneous nuclear ribonucleoprotein H, N-terminally processed	HNRNPH1;Hnrnph1	2	19	9	51.4	49229	449	3.53E-210	0.59914	0.72219	22902	97	0.58684	0.7443	34271	97	10021	10461	23876	97
P31946	P31946	14-3-3 protein beta/alpha;14-3-3 protein beta/alpha, N-terminally processed	YWHAB	1	12	2	51.2	28082	246	3.67E-142	13582	15598	39155	37	1155	13981	41.07	37	0.87738	10012	26225	37
P31948	P31948	Stress-induced-phosphoprotein 1	STIP1	1	30	9	53.4	62639	543	8.33E-235	0.77053	1168	39743	101	0.77616	11198	46463	101	0.89717	0.96842	40843	101
P31949;P50543	P31949;P50543	Protein S100-A11	S100A11;S100a11	2	5	5	49.5	11.74	105	4.90E-41	10065	20165	67.89	21	0.70839	11802	113.05	21	0.89011	0.96627	73269	21
P32004;P11627	P32004	Neural cell adhesion molecule L1	L1CAM	2	16	16	16.4	140	1257	7.06E-66	0.46716	0.57578	25383	14	0.51466	0.63342	38981	14	10561	11875	44905	14
P32020	P32020	Non-specific lipid-transfer protein	Scp2	1	10	3	18.1	59125	547	1.70E-35	NaN	NaN	NaN	0	NaN	NaN	NaN	0	NaN	NaN	NaN	0
P32067	P32067	Lupus La protein homolog	Ssb	1	6	2	16.6	47756	415	6.96E-21	NaN	NaN	NaN	0	NaN	NaN	NaN	0	NaN	NaN	NaN	0
P32121;Q91YI4	P32121;Q91YI4	Beta-arrestin-2	ARRB2;Arrb2	2	5	4	17.6	46105	409	6.09E-16	11409	19007	51169	4	11024	17954	16297	4	0.85916	0.77143	56944	4
Q14409;P32189;Q64516;Q14410;Q9WU65	Q14409;P32189;Q64516	Putative glycerol kinase 3;Glycerol kinase	GK3P;GK;Gk	5	7	7	16.5	60597	553	2.61E-18	0.94021	0.86271	28705	8	0.77044	0.8173	63572	8	0.84144	0.9458	53.35	8
Q9Y295;P32233	Q9Y295;P32233	Developmentally-regulated GTP-binding protein 1	DRG1;Drg1	2	11	11	36.8	40542	367	6.90E-55	0.55812	0.96919	23756	11	0.62663	0.8535	35387	11	0.96408	10155	22765	11
P32261;P01008	P32261	Antithrombin-III	Serpinc1	2	17	13	43.4	52003	465	8.80E-82	13091	23415	101.51	9	22453	43123	87578	9	0.28672	0.26266	147.62	9
P32321;Q8K2D6	P32321	Deoxycytidylate deaminase	DCTD	2	5	5	44.9	20016	178	1.11E-24	17213	17618	17493	5	14168	1767	27324	5	0.93683	0.94484	13397	5
P32322;Q922W5	P32322	Pyrroline-5-carboxylate reductase 1, mitochondrial	PYCR1	2	9	6	36.4	33.36	319	9.73E-69	0.34079	0.33483	17887	7	0.39452	0.50344	19848	7	13344	13082	25142	7
P32519;Q60775	P32519	ETS-related transcription factor Elf-1	ELF1	2	3	3	10.8	67497	619	1.54E-13	10392	11658	19106	3	0.91136	12391	16525	3	0.86976	10115	22317	3
P32780;Q9DBA9	P32780;Q9DBA9	General transcription factor IIH subunit 1	GTF2H1;Gtf2h1	2	6	6	13	62031	548	2.31E-16	0.79387	0.71372	17923	2	0.66489	0.6527	24566	2	0.9012	10465	87607	2
P32848;P20472	P32848	Parvalbumin alpha	Pvalb	2	9	9	64.5	11.93	110	1.45E-52	NaN	NaN	NaN	0	NaN	NaN	NaN	0	NaN	NaN	NaN	0
P32921	P32921	Tryptophan--tRNA ligase, cytoplasmic;T1-TrpRS;T2-TrpRS	Wars	1	14	3	30.1	54357	481	4.66E-89	NaN	NaN	NaN	0	NaN	NaN	NaN	0	NaN	NaN	NaN	0
P32969	P32969	60S ribosomal protein L9	RPL9	1	6	2	39.1	21863	192	1.39E-76	0.77127	0.73724	36676	30	0.5968	0.77629	35797	30	0.8033	0.90352	29466	30
P33121;Q8JZR0;Q9ULC5;Q9UKU0	P33121	Long-chain-fatty-acid--CoA ligase 1	ACSL1	4	33	24	44.8	77942	698	2.37E-163	0.41656	0.47138	44009	50	0.38255	0.47023	47263	51	0.92656	10019	36404	51
P33176;P33175;Q12840	P33176	Kinesin-1 heavy chain	KIF5B	3	41	8	48.1	109.68	963	1.59E-251	10051	15575	37808	42	0.97663	14397	45744	42	0.9127	0.96877	37297	42
P33240;Q8BIQ5	P33240;Q8BIQ5	Cleavage stimulation factor subunit 2	CSTF2;Cstf2	2	11	6	30.8	60959	577	1.62E-67	0.45757	0.70705	18118	6	0.50864	0.64558	17689	6	10032	10956	28465	6
P33316	P33316	Deoxyuridine 5-triphosphate nucleotidohydrolase, mitochondrial	DUT	1	11	11	54	26563	252	6.70E-99	16168	15238	41427	12	13654	1212	45802	12	0.99128	10391	21014	12
P33527;O35379	P33527	Multidrug resistance-associated protein 1	ABCC1	2	12	12	13.5	171.59	1531	1.41E-82	0.43659	0.61176	62335	4	0.37186	0.49565	84506	4	0.998	10957	26.69	4
P56390;P33552	P56390;P33552	Cyclin-dependent kinases regulatory subunit 2	Cks2;CKS2	2	3	2	32.9	98742	79	1.48E-07	16127	16086	66.75	6	1578	16541	98.38	6	0.98501	0.98778	20.63	6
P33622	P33622	Apolipoprotein C-III	Apoc3	1	2	2	27.3	10982	99	4.42E-27	NaN	NaN	NaN	0	NaN	NaN	NaN	0	NaN	NaN	NaN	0
P33897;P48410	P33897	ATP-binding cassette sub-family D member 1	ABCD1	2	11	10	20.7	82936	745	2.15E-37	0.5146	0.98447	35168	4	0.36858	0.67463	44863	4	0.71863	0.62777	17249	4
P33981	P33981	Dual specificity protein kinase TTK	TTK	1	1	1	2.1	97071	857	0.00093907	1268	12962	35086	3	0.83889	10101	92724	3	0.95711	11208	32.56	3
P33991;P49717;Q9CWV1	P33991;P49717	DNA replication licensing factor MCM4	MCM4;Mcm4	3	36	35	46.5	96557	863	5.44E-199	0.65462	0.74175	31795	51	0.56265	0.71408	55644	52	0.87484	0.94443	37744	51
P33992;P49718	P33992;P49718	DNA replication licensing factor MCM5	MCM5;Mcm5	2	34	34	48.8	82285	734	5.05E-107	0.71094	0.76521	28955	63	0.64968	0.72893	42122	63	0.99243	10768	26257	63
P33993	P33993	DNA replication licensing factor MCM7	MCM7	1	35	23	46.9	81307	719	3.10E-179	0.73909	0.79999	44141	65	0.63285	0.80623	52463	66	0.90915	0.97451	35204	66
P34059	P34059	N-acetylgalactosamine-6-sulfatase	GALNS	1	6	6	13.4	58025	522	1.71E-14	0.85553	0.93201	43343	8	11731	13714	55.2	8	10032	10818	40366	8
P34884	P34884	Macrophage migration inhibitory factor	Mif	1	2	2	26.1	12504	115	5.61E-25	NaN	NaN	NaN	0	NaN	NaN	NaN	0	NaN	NaN	NaN	0
P34896;P50431	P34896	Serine hydroxymethyltransferase, cytosolic	SHMT1	2	8	7	16.1	53082	483	1.21E-20	27699	27031	43575	3	18654	20408	92212	3	0.80204	0.86747	44894	3
P34897	P34897	Serine hydroxymethyltransferase, mitochondrial	SHMT2	1	25	24	49.6	55992	504	1.33E-129	0.39572	0.5736	41081	42	0.43038	0.61621	58609	42	10577	11407	45527	42
P34914	P34914	Bifunctional epoxide hydrolase 2;Cytosolic epoxide hydrolase 2;Lipid-phosphate phosphatase	Ephx2	1	4	4	9.9	62515	554	4.30E-10	NaN	NaN	NaN	0	NaN	NaN	NaN	0	NaN	NaN	NaN	0
P34928;P02654	P34928	Apolipoprotein C-I;Truncated apolipoprotein C-I	Apoc1	2	3	3	22.7	96963	88	6.40E-11	NaN	NaN	NaN	0	NaN	NaN	NaN	0	NaN	NaN	NaN	0
P34932	P34932	Heat shock 70 kDa protein 4	HSPA4	1	49	21	67	94.33	840	0	0.84806	10602	30788	124	0.75279	10372	40163	124	0.85917	0.96758	29232	123
P34949;Q924M7	P34949	Mannose-6-phosphate isomerase	MPI	2	3	3	10.2	46655	423	1.17E-14	2134	22324	78438	3	18444	18714	17129	3	0.89071	10191	16.22	3
P35052;Q9QZF2	P35052;Q9QZF2	Glypican-1;Secreted glypican-1	GPC1;Gpc1	2	2	2	6.5	61.68	558	2.74E-05	NaN	NaN	NaN	1	NaN	NaN	NaN	1	NaN	NaN	NaN	1
Q9JJV2;P35080	Q9JJV2;P35080	Profilin-2	Pfn2;PFN2	2	4	4	36.4	15032	140	1.07E-26	15858	20224	33644	8	13233	17997	25.73	8	0.92796	0.94451	31065	8
P35221;P26231;REV__Q9JMB1;REV__Q9P2T0;Q9UI47;Q65CL1	P35221;P26231	Catenin alpha-1	CTNNA1;Ctnna1	6	36	28	50.3	100.07	906	2.75E-284	0.73091	10318	26454	48	0.66334	0.95297	40689	47	0.92838	0.97479	31196	48
P35222;Q02248	P35222;Q02248	Catenin beta-1	CTNNB1;Ctnnb1	2	30	25	50.8	85496	781	7.88E-262	11027	11869	27531	105	10126	10995	39525	105	0.94202	0.97381	31085	105
P35226;P25916	P35226;P25916	Polycomb complex protein BMI-1	BMI1;Bmi1	2	2	2	13.5	36949	326	2.13E-16	NaN	NaN	NaN	0	NaN	NaN	NaN	0	NaN	NaN	NaN	0
P35227;P23798	P35227;P23798	Polycomb group RING finger protein 2	PCGF2;Pcgf2	2	2	2	11.6	37788	344	1.03E-06	NaN	NaN	NaN	1	NaN	NaN	NaN	1	NaN	NaN	NaN	1
P35232;P67778	P35232;P67778	Prohibitin	PHB;Phb	2	16	16	59.6	29804	272	2.75E-75	0.54048	0.67968	37794	51	0.673	0.75641	46315	51	12356	13719	39416	50
P35237	P35237	Serpin B6	SERPINB6	1	13	10	43.6	42621	376	8.48E-76	17386	16893	40611	15	1204	16183	39558	15	0.95121	0.99835	20673	15
P35240;P46662	P35240;P46662	Merlin	NF2;Nf2	2	2	2	4.5	69689	595	6.11E-08	NaN	NaN	NaN	1	NaN	NaN	NaN	1	NaN	NaN	NaN	1
P35241	P35241	Radixin	RDX	1	27	2	41.3	68563	583	2.78E-89	10278	14222	47671	16	0.91114	1151	61968	16	0.79374	0.87264	50342	16
P35244;Q9CQ71	P35244	Replication protein A 14 kDa subunit	RPA3	2	4	4	51.2	13569	121	6.65E-22	0.8901	0.927	29915	15	0.79014	0.88351	53956	15	0.9893	10588	36.71	16
P35249;Q99J62	P35249;Q99J62	Replication factor C subunit 4	RFC4;Rfc4	2	13	13	43.3	39681	363	4.66E-39	0.56339	0.51346	36525	10	0.51882	0.59719	32262	10	0.93818	10621	11733	10
P35250;Q9WUK4	P35250;Q9WUK4	Replication factor C subunit 2	RFC2;Rfc2	2	8	8	25.4	39157	354	4.73E-16	0.45818	0.63186	11296	4	0.49766	0.66411	21358	4	0.79138	0.89586	34955	4
P35251;P35601	P35251	Replication factor C subunit 1	RFC1	2	5	5	5.7	128.25	1148	1.10E-18	10463	18328	44061	3	17731	22764	31648	3	14726	1205	47333	3
P67984;P35268	P67984;P35268	60S ribosomal protein L22	Rpl22;RPL22	2	4	4	50.8	14759	128	3.59E-27	0.81071	0.91621	14985	13	0.65604	0.82916	13216	13	0.85171	0.93776	60502	13
P35269;Q3THK3	P35269;Q3THK3	General transcription factor IIF subunit 1	GTF2F1;Gtf2f1	2	12	12	25.7	58.24	517	1.91E-38	11359	10681	39294	31	10597	10624	39608	31	0.8683	0.93722	21188	31
P35270;REV__Q16649;REV__O08750	P35270	Sepiapterin reductase	SPR	3	7	7	37.9	28048	261	1.89E-28	NaN	NaN	NaN	1	NaN	NaN	NaN	1	NaN	NaN	NaN	1
P35278	P35278	Ras-related protein Rab-5C	Rab5c	1	9	2	54.2	23412	216	1.78E-61	NaN	NaN	NaN	0	NaN	NaN	NaN	0	NaN	NaN	NaN	0
Q9NP72;P35293	Q9NP72;P35293	Ras-related protein Rab-18	RAB18;Rab18	2	8	8	46.6	22977	206	1.07E-38	0.56596	0.83594	14017	6	0.54756	0.80973	37.84	6	0.89783	0.96949	52038	6
P35441;P07996;CON__Q28194;P35442	P35441;P07996	Thrombospondin-1	Thbs1;THBS1	4	4	4	4	129.65	1170	2.81E-15	13933	30091	141.91	2	11699	2.02	104.04	2	0.82721	0.72457	44859	2
P35475	P35475	Alpha-L-iduronidase	IDUA	1	3	3	5.7	72669	653	2.45E-05	0.4523	0.88984	79681	2	0.69506	11171	12694	2	15577	13554	4176	2
P35492	P35492	Histidine ammonia-lyase	Hal	1	3	3	8.4	72257	657	2.85E-10	NaN	NaN	NaN	0	NaN	NaN	NaN	0	NaN	NaN	NaN	0
P35505	P35505	Fumarylacetoacetase	Fah	1	2	1	5	46175	419	3.93E-06	NaN	NaN	NaN	0	NaN	NaN	NaN	0	NaN	NaN	NaN	0
P35555	P35555	Fibrillin-1	FBN1	1	35	6	15.3	312.24	2871	4.12E-152	NaN	NaN	NaN	0	NaN	NaN	NaN	0	NaN	NaN	NaN	0
P35564	P35564	Calnexin	Canx	1	21	10	37.6	67277	591	4.52E-73	NaN	NaN	NaN	0	NaN	NaN	NaN	0	NaN	NaN	NaN	0
P35573	P35573	Glycogen debranching enzyme;4-alpha-glucanotransferase;Amylo-alpha-1,6-glucosidase	AGL	1	12	12	10.8	174.76	1532	2.26E-39	2421	24056	57121	6	11518	12185	67015	6	0.49553	0.56203	21001	6
P35579;REV__Q9UKV3	P35579	Myosin-9	MYH9	2	121	33	58.5	226.53	1960	0	14394	18845	37086	326	13404	18201	46177	326	0.98829	10366	30099	326
P35580;Q61879	P35580;Q61879	Myosin-10	MYH10;Myh10	2	88	67	47.6	229	1976	0	0.6241	10312	40817	98	0.68521	10992	54911	98	1152	11657	37353	97
Q9BXS5;P35585;Q9Y6Q5;Q9WVP1	Q9BXS5;P35585	AP-1 complex subunit mu-1	AP1M1;Ap1m1	4	14	14	44.9	48586	423	2.02E-46	1189	11741	15926	22	10277	11473	17515	22	0.99984	10518	18924	22
P35606	P35606	Coatomer subunit beta	COPB2	1	31	3	39.5	102.49	906	3.47E-141	11526	12481	26049	37	1145	12273	43555	37	0.93284	0.99907	34411	37
Q9JI91;P35609	Q9JI91;P35609	Alpha-actinin-2	Actn2;ACTN2	2	26	13	33.8	103.83	894	1.35E-131	NaN	NaN	NaN	0	NaN	NaN	NaN	0	NaN	NaN	NaN	0
P35610	P35610	Sterol O-acyltransferase 1	SOAT1	1	6	4	14.9	64734	550	1.62E-95	0.38494	0.67874	72683	14	0.39098	0.58959	79969	14	1016	10729	34.15	13
P35611	P35611	Alpha-adducin	ADD1	1	14	6	28.1	80954	737	4.86E-70	14643	14343	30947	19	11394	12508	42845	19	0.85178	0.95635	19015	19
P35612;Q9QYB8	P35612;Q9QYB8	Beta-adducin	ADD2;Add2	2	8	6	15.7	80853	726	9.97E-23	1548	11707	11603	3	13985	11532	10077	3	0.99292	0.89455	15482	3
P35613	P35613	Basigin	BSG	1	7	7	27.5	42.2	385	3.63E-27	0.33836	0.36028	62131	8	0.36564	0.34975	45803	8	0.91858	0.98621	32619	7
P56959;P35637	P56959;P35637	RNA-binding protein FUS	Fus;FUS	2	8	6	12.4	52673	518	1.26E-53	0.6001	0.74049	26006	26	0.51837	0.75262	30259	26	0.93795	10342	19189	26
P35658	P35658	Nuclear pore complex protein Nup214	NUP214	1	35	28	25.5	213.62	2090	1.21E-165	0.54945	0.63741	29829	27	0.5508	0.71886	35055	27	1121	11445	24322	27
P35659	P35659	Protein DEK	DEK	1	16	5	32.8	42674	375	5.52E-45	0.64603	0.79253	32628	18	0.54454	0.82695	43.24	18	0.86139	0.98218	21376	18
P35700	P35700	Peroxiredoxin-1	Prdx1	1	12	5	49.7	22176	199	1.08E-51	NaN	NaN	NaN	0	NaN	NaN	NaN	0	NaN	NaN	NaN	0
P35711;P35710;P40645;P35712	P35711;P35710;P40645;P35712	Transcription factor SOX-5;Transcription factor SOX-6	SOX5;Sox5;Sox6;SOX6	4	3	3	5.4	84025	763	6.36E-10	0.18469	0.40059	15157	2	0.28192	0.53162	62362	2	15592	13475	29796	2
P35749;O08638	P35749;O08638	Myosin-11	MYH11;Myh11	2	22	1	10.3	227.34	1972	2.83E-159	0.54062	10391	96749	3	0.71396	12238	12257	3	13887	11194	94693	3
P35754	P35754	Glutaredoxin-1	GLRX	1	3	2	43.4	11776	106	4.92E-14	19844	26868	103.39	2	17079	24831	35077	2	0.84984	0.90316	57.18	2
P35790;O54804	P35790	Choline kinase alpha	CHKA	2	5	5	16.6	52248	457	2.05E-24	0.87322	13153	75368	2	0.86832	13374	74892	2	10672	11212	24643	2
P35803	P35803	Neuronal membrane glycoprotein M6-b	Gpm6b	1	3	2	10.7	36209	328	2.30E-15	NaN	NaN	NaN	0	NaN	NaN	NaN	0	NaN	NaN	NaN	0
P35813;P49443	P35813;P49443	Protein phosphatase 1A	PPM1A;Ppm1a	2	7	5	21.5	42447	382	5.58E-21	10848	21429	32583	6	0.9035	16518	41691	6	0.80715	0.80585	29828	6
P35821	P35821	Tyrosine-protein phosphatase non-receptor type 1	Ptpn1	1	12	1	28.2	49593	432	4.12E-61	NaN	NaN	NaN	0	NaN	NaN	NaN	0	NaN	NaN	NaN	0
Q15262;P35822	Q15262;P35822	Receptor-type tyrosine-protein phosphatase kappa	PTPRK;Ptprk	2	3	3	3.2	162.1	1439	4.22E-08	NaN	NaN	NaN	1	NaN	NaN	NaN	1	NaN	NaN	NaN	1
P35869	P35869	Aryl hydrocarbon receptor	AHR	1	1	1	1.2	96146	848	0.00047259	NaN	NaN	NaN	0	NaN	NaN	NaN	0	NaN	NaN	NaN	0
P35914	P35914	Hydroxymethylglutaryl-CoA lyase, mitochondrial	HMGCL	1	3	3	12.3	34.36	325	8.05E-08	NaN	NaN	NaN	0	NaN	NaN	NaN	0	NaN	NaN	NaN	0
P46471;P35998	P46471;P35998	26S protease regulatory subunit 7	Psmc2;PSMC2	2	27	27	65.6	48647	433	5.43E-172	1.06	11328	23536	51	0.9247	11899	32.52	51	10131	10305	27786	51
P36383	P36383	Gap junction gamma-1 protein	GJC1	1	1	1	6.3	45469	396	2.29E-07	NaN	NaN	NaN	0	NaN	NaN	NaN	0	NaN	NaN	NaN	0
P36404;Q9D0J4	P36404;Q9D0J4	ADP-ribosylation factor-like protein 2	ARL2;Arl2	2	4	4	30.4	20878	184	1.87E-13	0.74196	11153	85471	2	0.83963	13521	46.92	2	11849	13519	29114	2
P36405;Q9WUL7	P36405;Q9WUL7	ADP-ribosylation factor-like protein 3	ARL3;Arl3	2	7	7	54.4	20455	182	2.20E-22	33715	27833	34561	8	30003	30276	42195	8	10744	10901	17637	8
Q8BGX0;P36406	Q8BGX0;P36406	E3 ubiquitin-protein ligase TRIM23	Trim23;TRIM23	2	1	1	1.7	63931	574	0.0006337	NaN	NaN	NaN	0	NaN	NaN	NaN	0	NaN	NaN	NaN	0
P36507	P36507	Dual specificity mitogen-activated protein kinase kinase 2	MAP2K2	1	13	6	34	44424	400	4.56E-34	12811	12518	55441	17	10452	14741	57808	17	0.9984	10592	19963	17
P36542	P36542	ATP synthase subunit gamma, mitochondrial	ATP5C1	1	10	8	32.9	32996	298	2.26E-41	0.85361	10243	37515	28	0.93826	12084	55605	28	11957	11215	26497	28
P50518;P36543;Q96A05;Q9D593	P50518;P36543	V-type proton ATPase subunit E 1	Atp6v1e1;ATP6V1E1	4	13	13	41.6	26157	226	6.43E-140	11984	13383	31891	30	10099	14261	53798	30	10497	11403	37439	30
P36551	P36551	Coproporphyrinogen-III oxidase, mitochondrial	CPOX	1	20	14	43.2	50151	454	3.58E-66	0.59766	0.70884	34632	23	0.56048	0.61879	36075	23	0.85427	0.90115	26703	23
P36552	P36552	Coproporphyrinogen-III oxidase, mitochondrial	Cpox	1	7	1	15.3	49714	443	4.54E-22	NaN	NaN	NaN	0	NaN	NaN	NaN	0	NaN	NaN	NaN	0
P36578;Q9D8E6	P36578;Q9D8E6	60S ribosomal protein L4	RPL4;Rpl4	2	22	22	41.9	47697	427	6.75E-124	0.44634	0.4805	47671	61	0.35063	0.43104	66175	61	0.8423	0.91374	29.96	61
P36639;P53368	P36639;P53368	7,8-dihydro-8-oxoguanine triphosphatase	NUDT1;Nudt1	2	2	2	11.2	22519	197	1.02E-14	10757	11914	94238	3	14563	13997	78773	3	0.97168	11223	71088	3
P36776	P36776	Lon protease homolog, mitochondrial	LONP1	1	32	19	37	106.49	959	8.03E-177	0.54452	0.78366	28816	47	0.55835	0.72323	46944	46	0.94839	10419	45767	47
P36871	P36871	Phosphoglucomutase-1	PGM1	1	23	6	48.6	61448	562	3.22E-106	18721	23796	39784	30	1543	21162	51455	30	0.82411	0.88296	30263	30
P63087;P36873	P63087;P36873	Serine/threonine-protein phosphatase PP1-gamma catalytic subunit	Ppp1cc;PPP1CC	2	12	1	48	36983	323	1.17E-72	NaN	NaN	NaN	1	NaN	NaN	NaN	1	NaN	NaN	NaN	1
P36915;P36916	P36915;P36916	Guanine nucleotide-binding protein-like 1	GNL1;Gnl1	2	7	7	13.2	68.66	607	4.21E-20	20837	20603	48848	6	19242	1.82	59579	6	0.86025	0.94712	38443	6
P60898;P36954	P60898;P36954	DNA-directed RNA polymerase II subunit RPB9	Polr2i;POLR2I	2	2	2	18.4	14523	125	2.70E-09	18471	13763	12.96	3	19332	13968	38006	3	0.91291	0.95461	31151	3
P36957	P36957	Dihydrolipoyllysine-residue succinyltransferase component of 2-oxoglutarate dehydrogenase complex, mitochondrial	DLST	1	13	8	29.6	48755	453	4.58E-83	0.50749	0.9375	33547	16	0.61553	10118	43.82	16	11707	11716	34853	16
P36959;Q9DCZ1	P36959;Q9DCZ1	GMP reductase 1	GMPR;Gmpr	2	7	6	30.4	37418	345	1.19E-44	0.59096	13269	67122	9	14084	28197	28165	9	22678	19316	45525	9
P36969	P36969	Phospholipid hydroperoxide glutathione peroxidase, mitochondrial	GPX4	1	3	3	19.3	22192	197	1.02E-07	62988	95922	22418	2	58879	87165	31.38	2	10133	10014	14999	2
P37108;P16254	P37108;P16254	Signal recognition particle 14 kDa protein;Signal recognition particle 14 kDa protein;Signal recognition particle 14 kDa protein, N-terminally processed	SRP14;Srp14	2	8	8	46.3	14.57	136	1.00E-42	0.92899	0.89283	20893	18	0.74764	0.87289	22941	18	0.84687	0.97565	24248	17
P37173;Q62312	P37173;Q62312	TGF-beta receptor type-2	TGFBR2;Tgfbr2	2	2	2	4.2	64567	567	5.15E-10	NaN	NaN	NaN	0	NaN	NaN	NaN	0	NaN	NaN	NaN	0
P37198	P37198	Nuclear pore glycoprotein p62	NUP62	1	7	3	20.5	53254	522	1.17E-115	0.65286	0.76058	20419	19	0.6914	0.83113	22161	19	10202	1146	20019	19
P37235;P84075;P84074;P62748;Q91X97;P61601	P37235;P84075;P84074;P62748	Hippocalcin-like protein 1;Neuron-specific calcium-binding protein hippocalcin	HPCAL1;Hpca;HPCA;Hpcal1	6	5	5	29	22313	193	2.87E-14	1308	15003	42474	7	13357	13953	29118	7	0.8024	0.84589	34627	7
P37268;P53798	P37268	Squalene synthase	FDFT1	2	20	20	48.7	48115	417	7.06E-123	0.73132	0.67019	56742	19	10013	11415	54663	20	13701	14691	43945	20
P37802	P37802	Transgelin-2	TAGLN2	1	13	5	67.3	22391	199	2.98E-120	0.85716	17449	33517	7	0.799	14109	38415	7	0.8699	0.98539	21722	7
P37804;Q01995	P37804;Q01995	Transgelin	Tagln;TAGLN	2	10	9	53.2	22576	201	2.87E-45	NaN	NaN	NaN	0	NaN	NaN	NaN	0	NaN	NaN	NaN	0
P37837	P37837	Transaldolase	TALDO1	1	16	7	43.3	37.54	337	4.65E-62	12455	12422	49331	49	0.89773	13073	42997	49	0.84063	0.95639	19416	49
P37840;O55042	P37840;O55042	Alpha-synuclein	SNCA;Snca	2	6	4	48.6	14.46	140	8.23E-110	0.90843	15727	50447	29	0.90917	13949	52331	29	0.86944	0.90052	26866	29
P37889;P98095	P37889	Fibulin-2	Fbln2	2	7	7	8.8	131.83	1221	1.78E-28	NaN	NaN	NaN	0	NaN	NaN	NaN	0	NaN	NaN	NaN	0
P38060	P38060	Hydroxymethylglutaryl-CoA lyase, mitochondrial	Hmgcl	1	3	3	12.3	34238	325	7.79E-06	NaN	NaN	NaN	0	NaN	NaN	NaN	0	NaN	NaN	NaN	0
P38117	P38117	Electron transfer flavoprotein subunit beta	ETFB	1	16	9	63.1	27843	255	1.25E-65	0.66402	0.94629	41431	25	0.58563	10205	49655	25	10143	1107	39027	25
P38159;Q91VM5;O75526	P38159;Q91VM5	RNA-binding motif protein, X chromosome;RNA-binding motif protein, X chromosome, N-terminally processed;RNA binding motif protein, X-linked-like-1	RBMX;Rbmxl1	3	21	1	49.6	42331	391	1.38E-91	0.47274	0.64593	26715	40	0.433	0.54314	51463	40	0.84908	0.93759	45216	40
P38398	P38398	Breast cancer type 1 susceptibility protein	BRCA1	1	1	1	1.5	207.72	1863	2.16E-30	NaN	NaN	NaN	1	NaN	NaN	NaN	1	NaN	NaN	NaN	1
P38432;Q5SU73	P38432	Coilin	COIL	2	11	11	24.5	62608	576	4.29E-50	0.4437	0.56153	47464	9	0.42495	0.69638	33673	9	0.93563	11257	43884	9
P38571	P38571	Lysosomal acid lipase/cholesteryl ester hydrolase	LIPA	1	1	1	2.8	45418	399	0.00069841	NaN	NaN	NaN	0	NaN	NaN	NaN	0	NaN	NaN	NaN	0
P38606	P38606	V-type proton ATPase catalytic subunit A	ATP6V1A	1	31	7	56.6	68303	617	4.87E-144	0.74525	11374	46902	58	0.93697	13745	69683	58	10721	11288	45792	58
P38646;P38647	P38646;P38647	Stress-70 protein, mitochondrial	HSPA9;Hspa9	2	49	48	65.2	73.68	679	0	0.61874	0.83337	42431	190	0.62959	0.88415	45878	190	10665	11566	35038	190
P38919;Q91VC3	P38919;Q91VC3	Eukaryotic initiation factor 4A-III	EIF4A3;Eif4a3	2	23	18	47.7	46871	411	1.63E-104	0.77615	0.82971	38096	40	0.7123	0.85617	42846	40	0.99606	10656	32036	40
P38935	P38935	DNA-binding protein SMUBP-2	IGHMBP2	1	1	1	1.7	109.15	993	0.00092939	NaN	NaN	NaN	0	NaN	NaN	NaN	0	NaN	NaN	NaN	0
P38936	P38936	Cyclin-dependent kinase inhibitor 1	CDKN1A	1	2	2	18.3	18119	164	4.45E-05	0.48087	0.59047	44104	4	0.5523	0.81907	41398	4	10872	10884	32015	4
P39019;Q9CZX8	P39019;Q9CZX8	40S ribosomal protein S19	RPS19;Rps19	2	8	8	43.4	16.06	145	5.69E-38	0.85025	0.975	48801	44	0.6972	0.94739	60386	44	0.9276	0.97926	34097	44
P39023	P39023	60S ribosomal protein L3	RPL3	1	17	3	45.2	46108	403	4.41E-99	0.56569	0.5789	42762	46	0.46991	0.55608	52431	46	0.8572	0.97917	23379	46
P39039	P39039	Mannose-binding protein A	Mbl1	1	3	3	7.1	25396	239	4.58E-07	NaN	NaN	NaN	0	NaN	NaN	NaN	0	NaN	NaN	NaN	0
P39061;P39060	P39061	Collagen alpha-1(XVIII) chain;Endostatin	Col18a1	2	4	4	3.6	182.17	1774	1.48E-41	NaN	NaN	NaN	0	NaN	NaN	NaN	0	NaN	NaN	NaN	0
P39687;O43423	P39687	Acidic leucine-rich nuclear phosphoprotein 32 family member A	ANP32A	2	10	6	34.9	28585	249	3.75E-79	11784	11514	38008	27	10613	11661	43655	27	0.88829	10057	28198	27
P39748;P39749	P39748;P39749	Flap endonuclease 1	FEN1;Fen1	2	15	15	55	42592	380	8.12E-163	0.94352	0.88767	29798	44	0.83025	0.96106	34674	45	0.91468	10142	23698	45
P39880;P53564;P70298;O14529	P39880;P53564	Homeobox protein cut-like 1	CUX1;Cux1	4	13	4	12.4	164.19	1505	2.83E-58	0.89904	10671	50832	11	0.71003	0.92208	45006	11	0.84674	0.96312	21049	11
P40121	P40121	Macrophage-capping protein	CAPG	1	14	10	43.1	38498	348	3.92E-129	18647	29978	45383	18	24758	48757	39969	18	0.95774	10781	28227	18
P40123;Q9CYT6	P40123	Adenylyl cyclase-associated protein 2	CAP2	2	4	4	13.2	52823	477	7.16E-17	0.5304	10981	23346	3	0.56885	11895	40356	3	0.91112	0.98504	16976	3
P40124	P40124	Adenylyl cyclase-associated protein 1	Cap1	1	18	6	46.2	51564	474	5.53E-131	22772	20247	65918	8	18562	18847	81477	8	0.70479	0.82336	34136	8
P40126;P29812	P40126	L-dopachrome tautomerase	DCT	2	10	10	24.3	59145	519	5.39E-46	0.26318	0.49832	33249	9	0.24792	0.40194	23105	9	0.93731	0.83049	26204	9
P40142	P40142	Transketolase	Tkt	1	23	11	39.2	67.63	623	1.83E-142	23745	16657	36641	11	15386	14907	40439	11	0.84223	0.95139	13749	11
P40222;Q6PAM1	P40222;Q6PAM1	Alpha-taxilin	TXLNA;Txlna	2	18	18	45.2	61.89	546	6.34E-75	0.96072	10542	32636	13	0.81068	10404	31518	13	0.92896	1009	37947	13
P40227	P40227	T-complex protein 1 subunit zeta	CCT6A	1	20	4	46.7	58024	531	1.65E-118	0.79381	10042	20898	44	0.67249	0.91767	42567	44	0.92593	0.98443	39313	44
P40306	P40306	Proteasome subunit beta type-10	PSMB10	1	2	1	7.3	28936	273	9.38E-05	NaN	NaN	NaN	0	NaN	NaN	NaN	0	NaN	NaN	NaN	0
P40429;P19253;Q6NVV1	P40429;P19253;Q6NVV1	60S ribosomal protein L13a;Putative 60S ribosomal protein L13a-like MGC87657	RPL13A;Rpl13a	3	7	7	28.1	23577	203	4.85E-31	0.57169	0.50815	43638	15	0.4524	0.41236	39781	15	0.78956	0.91287	97951	15
P40616;P61211	P40616;P61211	ADP-ribosylation factor-like protein 1	ARL1;Arl1	2	5	5	45.3	20417	181	1.12E-21	10251	11675	24611	8	0.75536	0.80291	81	8	0.61483	0.68123	74523	8
P40692;Q9JK91	P40692	DNA mismatch repair protein Mlh1	MLH1	2	9	9	17.6	84.6	756	1.09E-34	0.34774	0.73146	76746	3	0.48292	0.91271	107.93	3	0.91437	10527	53515	3
P42227;P40763	P42227;P40763	Signal transducer and activator of transcription 3	Stat3;STAT3	2	12	12	21.9	88053	770	2.35E-76	29171	26928	16748	14	22226	25443	25218	14	0.79695	0.9129	26891	14
P40818;Q80U87	P40818	Ubiquitin carboxyl-terminal hydrolase 8	USP8	2	8	8	10.6	127.52	1118	3.88E-19	1085	15275	27885	6	0.99959	12739	42407	7	0.89491	0.93491	28981	7
P40855;Q8VCI5	P40855;Q8VCI5	Peroxisomal biogenesis factor 19	PEX19;Pex19	2	6	6	29.4	32806	299	9.37E-44	11615	16752	20031	5	0.9739	14965	58493	5	0.96061	0.97469	15678	5
P40925	P40925	Malate dehydrogenase, cytoplasmic	MDH1	1	12	5	33.8	36426	334	5.06E-97	19703	23992	34333	61	18876	22641	42021	61	0.89429	0.99701	26284	61
P40926	P40926	Malate dehydrogenase, mitochondrial	MDH2	1	18	7	63.9	35503	338	5.19E-220	0.56037	0.90301	40265	69	0.59892	0.90688	33831	69	1037	10495	31259	69
P40936	P40936	Indolethylamine N-methyltransferase	Inmt	1	1	1	8	29459	264	1.20E-05	NaN	NaN	NaN	0	NaN	NaN	NaN	0	NaN	NaN	NaN	0
P40937;Q9D0F6	P40937;Q9D0F6	Replication factor C subunit 5	RFC5;Rfc5	2	11	11	29.4	38496	340	1.40E-25	0.36775	0.6895	14897	8	0.47959	0.75522	27675	8	11116	0.98207	22713	8
P40938;Q8R323	P40938;Q8R323	Replication factor C subunit 3	RFC3;Rfc3	2	12	12	44.7	40556	356	8.86E-60	0.62737	0.70852	18935	12	0.57893	0.63965	40449	12	0.831	0.94052	39994	12
P40939	P40939	Trifunctional enzyme subunit alpha, mitochondrial;Long-chain enoyl-CoA hydratase;Long chain 3-hydroxyacyl-CoA dehydrogenase	HADHA	1	32	24	52.2	82999	763	0	0.8547	10299	24638	106	0.93095	1174	39574	106	11119	12073	32911	106
P40967;Q60696	P40967	Melanocyte protein PMEL;M-alpha;M-beta	PMEL	2	10	10	18.8	70254	661	1.89E-70	0.7703	0.83258	35528	34	0.94949	11166	73359	34	11487	13132	48402	34
P41091;Q2VIR3;Q9Z0N2	P41091;Q2VIR3;Q9Z0N2	Eukaryotic translation initiation factor 2 subunit 3;Putative eukaryotic translation initiation factor 2 subunit 3-like protein;Eukaryotic translation initiation factor 2 subunit 3, Y-linked	EIF2S3;EIF2S3L;Eif2s3y	3	20	2	46.6	51109	472	5.79E-130	0.99132	0.97575	36906	50	0.77123	0.86638	46452	50	0.82988	0.91029	24777	49
P41208;Q9R1K9;Q12798;P41209	P41208;Q9R1K9	Centrin-2	CETN2;Cetn2	4	6	6	35.5	19738	172	9.61E-19	0.39101	0.81259	36981	5	0.75922	1262	29499	5	0.93271	0.92267	42343	5
P41212;P97360	P41212;P97360	Transcription factor ETV6	ETV6;Etv6	2	2	2	5.5	52999	452	0.00014191	NaN	NaN	NaN	0	NaN	NaN	NaN	0	NaN	NaN	NaN	0
P41214	P41214	Eukaryotic translation initiation factor 2D	EIF2D	1	2	2	5.5	64706	584	3.37E-05	NaN	NaN	NaN	1	NaN	NaN	NaN	1	NaN	NaN	NaN	1
P41216	P41216	Long-chain-fatty-acid--CoA ligase 1	Acsl1	1	16	7	21.9	77951	699	7.80E-56	NaN	NaN	NaN	0	NaN	NaN	NaN	0	NaN	NaN	NaN	0
P41223;Q6PGH1	P41223	Protein BUD31 homolog	BUD31	2	9	9	49.3	17	144	1.95E-37	0.74505	0.8397	12885	9	0.52915	0.58284	70894	9	0.57531	0.69727	75067	9
P41227;Q9QY36;Q3UX61;Q9BSU3	P41227;Q9QY36	N-alpha-acetyltransferase 10	NAA10;Naa10	4	10	10	43.8	26458	235	3.97E-64	0.6342	12285	47425	16	0.74571	11586	34537	16	10268	1071	48928	16
P41229;P41230;Q9BY66	P41229;P41230	Lysine-specific demethylase 5C	KDM5C;Kdm5c	3	12	12	12.1	175.72	1560	4.76E-38	0.6364	0.58481	19096	6	0.652	0.71514	30658	6	10334	11856	14205	6
P41236;Q6NXS1	P41236;Q6NXS1	Protein phosphatase inhibitor 2;Putative protein phosphatase inhibitor 2-like protein 3	PPP1R2;PPP1R2P3	2	6	4	34.1	23015	205	1.79E-51	11712	18695	21752	7	14817	16921	70485	7	0.77592	0.85098	48843	7
P41240;P41241;P41242	P41240;P41241	Tyrosine-protein kinase CSK	CSK;Csk	3	15	14	40.2	50704	450	4.52E-43	0.8453	14481	43196	16	0.93167	14881	50604	16	0.87689	0.99274	29927	16
P41245	P41245	Matrix metalloproteinase-9	Mmp9	1	4	4	9.2	80534	730	1.51E-20	NaN	NaN	NaN	0	NaN	NaN	NaN	0	NaN	NaN	NaN	0
P41250	P41250	Glycine--tRNA ligase	GARS	1	19	6	27.1	83165	739	2.82E-71	13773	14509	24986	25	10212	12968	51253	25	0.88574	0.9075	38235	25
P41251	P41251	Natural resistance-associated macrophage protein 1	Slc11a1	1	1	1	3.3	59.74	548	1.13E-05	NaN	NaN	NaN	0	NaN	NaN	NaN	0	NaN	NaN	NaN	0
P41252	P41252	Isoleucine--tRNA ligase, cytoplasmic	IARS	1	41	30	38	144.5	1262	2.25E-190	0.78212	0.81464	22992	49	0.69648	0.73852	57009	49	0.95321	10221	56058	49
P41317	P41317	Mannose-binding protein C	Mbl2	1	3	3	14.3	25957	244	2.79E-20	NaN	NaN	NaN	0	NaN	NaN	NaN	0	NaN	NaN	NaN	0
P48024;P41567;Q9CXU9;O60739	P48024;P41567;Q9CXU9;O60739	Eukaryotic translation initiation factor 1;Eukaryotic translation initiation factor 1b	Eif1;EIF1;Eif1b;EIF1B	4	6	6	64.6	12746	113	1.62E-85	10664	11337	22914	20	10559	10679	25518	20	0.90855	0.9656	17758	20
P41731	P41731	CD63 antigen	Cd63	1	1	1	4.6	25766	238	5.08E-11	NaN	NaN	NaN	0	NaN	NaN	NaN	0	NaN	NaN	NaN	0
P41743;Q62074	P41743;Q62074	Protein kinase C iota type	PRKCI;Prkci	2	4	4	12.4	68262	596	2.83E-15	NaN	NaN	NaN	1	NaN	NaN	NaN	1	NaN	NaN	NaN	1
P42125	P42125	Enoyl-CoA delta isomerase 1, mitochondrial	Eci1	1	4	4	19	32.25	289	4.12E-14	NaN	NaN	NaN	1	NaN	NaN	NaN	1	NaN	NaN	NaN	1
P42126	P42126	Enoyl-CoA delta isomerase 1, mitochondrial	ECI1	1	6	6	20.2	32816	302	5.36E-39	0.75249	0.92633	26255	13	0.81965	1016	25905	13	11948	11983	15818	13
P42166	P42166	Lamina-associated polypeptide 2, isoform alpha;Thymopoietin;Thymopentin	TMPO	1	24	15	47.8	75491	694	1.79E-162	0.60909	0.69672	42058	33	0.5726	0.70489	42353	33	0.90671	10289	23712	33
P42167	P42167	Lamina-associated polypeptide 2, isoforms beta/gamma;Thymopoietin;Thymopentin	TMPO	1	14	3	41	50.67	454	1.58E-87	0.71133	13207	68568	7	10538	15322	59572	7	1262	12996	30736	7
P42224	P42224	Signal transducer and activator of transcription 1-alpha/beta	STAT1	1	24	12	39.7	87334	750	3.34E-237	5355	39951	74816	38	4239	49448	50493	38	0.94478	10233	51928	38
P42225	P42225	Signal transducer and activator of transcription 1	Stat1	1	19	7	29.5	87196	749	4.60E-138	NaN	NaN	NaN	0	NaN	NaN	NaN	0	NaN	NaN	NaN	0
P42226;P52633	P42226	Signal transducer and activator of transcription 6	STAT6	2	5	5	7.4	94134	847	2.07E-12	13719	1891	31051	7	1247	16213	38641	7	0.76961	0.86533	56348	7
P42229	P42229	Signal transducer and activator of transcription 5A	STAT5A	1	9	2	14.2	90646	794	8.37E-40	28132	27112	54945	4	18343	26205	51978	4	0.77138	0.85536	56389	4
P42285;Q9CZU3	P42285;Q9CZU3	Superkiller viralicidic activity 2-like 2	SKIV2L2;Skiv2l2	2	21	21	25	117.8	1042	2.88E-120	0.47897	0.67757	57695	14	0.39722	0.59635	45757	14	0.98608	10392	46192	14
P42337;P42336	P42337;P42336	Phosphatidylinositol 4,5-bisphosphate 3-kinase catalytic subunit alpha isoform	Pik3ca;PIK3CA	2	4	4	4.9	124.41	1068	5.16E-09	13964	12615	31116	4	14441	1425	65655	4	0.92612	1102	40988	4
P42338;Q8BTI9	P42338;Q8BTI9	Phosphatidylinositol 4,5-bisphosphate 3-kinase catalytic subunit beta isoform	PIK3CB;Pik3cb	2	8	6	9	122.76	1070	3.02E-18	0.79182	12324	18287	5	0.86474	14531	35823	5	0.96393	0.97679	26922	5
P42345;Q9JLN9	P42345;Q9JLN9	Serine/threonine-protein kinase mTOR	MTOR;Mtor	2	23	23	11.7	288.89	2549	3.00E-63	0.61461	10271	25748	17	0.63688	0.89179	43788	17	0.87693	0.89854	35562	17
P42356	P42356	Phosphatidylinositol 4-kinase alpha	PI4KA	1	4	4	2.7	231.32	2044	3.25E-09	NaN	NaN	NaN	0	NaN	NaN	NaN	0	NaN	NaN	NaN	0
P42566	P42566	Epidermal growth factor receptor substrate 15	EPS15	1	14	9	22.3	98655	896	5.91E-84	0.85019	13968	22598	6	0.76256	15462	69288	7	0.959	1029	52385	7
P42567	P42567	Epidermal growth factor receptor substrate 15	Eps15	1	10	5	16.4	98.47	897	1.25E-49	NaN	NaN	NaN	1	NaN	NaN	NaN	1	NaN	NaN	NaN	1
P42574	P42574	Caspase-3;Caspase-3 subunit p17;Caspase-3 subunit p12	CASP3	1	9	4	33.9	31608	277	2.06E-90	24076	1978	42833	19	18644	21671	62792	19	0.88731	0.96464	34831	19
P42575;P29594	P42575	Caspase-2;Caspase-2 subunit p18;Caspase-2 subunit p13;Caspase-2 subunit p12	CASP2	2	6	6	18.6	50685	452	1.85E-25	22846	19578	56647	5	16261	1657	55.12	5	0.93613	0.94662	13553	5
P42669;Q00577;Q9UJV8;Q8R4E6	P42669;Q00577	Transcriptional activator protein Pur-alpha	Pura;PURA	4	4	3	21.8	34883	321	8.04E-38	0.8029	13799	25929	11	0.78923	13026	38815	11	0.89535	0.95777	15735	11
Q6ZWU9;P42677	Q6ZWU9;P42677	40S ribosomal protein S27	Rps27;RPS27	2	5	1	41.7	9461	84	7.00E-27	0.64432	0.64025	12431	9	0.53711	0.60984	21549	9	0.8557	0.94879	11465	9
P42684;Q4JIM5;P00520	P42684;Q4JIM5	Abelson tyrosine-protein kinase 2	ABL2;Abl2	3	3	2	4.8	128.34	1182	3.62E-07	0.54524	0.98703	21182	3	0.83444	13888	11052	3	12068	11793	15505	3
P42694;Q6DFV5	P42694;Q6DFV5	Probable helicase with zinc finger domain	HELZ;Helz	2	9	9	7.3	218.97	1942	1.93E-22	NaN	NaN	NaN	1	NaN	NaN	NaN	1	NaN	NaN	NaN	1
P42695	P42695	Condensin-2 complex subunit D3	NCAPD3	1	3	3	3.3	168.89	1498	3.84E-17	NaN	NaN	NaN	0	NaN	NaN	NaN	0	NaN	NaN	NaN	0
P42696;Q8C5L7	P42696	RNA-binding protein 34	RBM34	2	6	6	15.8	48564	430	1.15E-13	0.25987	0.53066	55154	3	0.22165	0.43344	77116	3	0.65915	0.58033	48829	2
P42703	P42703	Leukemia inhibitory factor receptor	Lifr	1	3	3	4.1	122.57	1092	1.87E-10	NaN	NaN	NaN	0	NaN	NaN	NaN	0	NaN	NaN	NaN	0
P42704	P42704	Leucine-rich PPR motif-containing protein, mitochondrial	LRPPRC	1	81	69	59.4	157.9	1394	0	0.46578	0.56239	33.16	169	0.47389	0.58566	46335	171	10007	11171	42.27	170
P42765	P42765	3-ketoacyl-CoA thiolase, mitochondrial	ACAA2	1	14	10	52.6	41924	397	1.25E-87	10945	17383	27447	11	11146	19243	30.55	11	0.92421	0.93309	14338	11
Q6ZWV7;P42766	Q6ZWV7;P42766	60S ribosomal protein L35	Rpl35;RPL35	2	2	2	13.8	14552	123	9.88E-08	0.20319	0.30235	35793	4	0.18449	0.27978	48672	4	0.95699	0.91569	17153	4
P42785;Q7TMR0	P42785	Lysosomal Pro-X carboxypeptidase	PRCP	2	9	9	22.8	55799	496	1.02E-24	0.85192	0.73463	21562	13	0.92375	0.81808	31203	13	11127	11426	26415	13
P42858;P42859	P42858	Huntingtin	HTT	2	19	19	9.2	347.6	3142	1.69E-63	12076	13981	29554	12	0.992	1207	47502	12	0.94512	10221	39.42	12
P42892;Q4PZA2	P42892;Q4PZA2	Endothelin-converting enzyme 1	ECE1;Ece1	2	3	3	4.2	87163	770	6.96E-06	NaN	NaN	NaN	0	NaN	NaN	NaN	0	NaN	NaN	NaN	0
P42932	P42932	T-complex protein 1 subunit theta	Cct8	1	27	5	48.5	59555	548	6.40E-135	NaN	NaN	NaN	0	NaN	NaN	NaN	0	NaN	NaN	NaN	0
P43003;P56564	P43003;P56564	Excitatory amino acid transporter 1	SLC1A3;Slc1a3	2	1	1	1.8	59572	542	0.00079517	NaN	NaN	NaN	0	NaN	NaN	NaN	0	NaN	NaN	NaN	0
P43007	P43007	Neutral amino acid transporter A	SLC1A4	1	7	7	22.4	55722	532	1.03E-118	NaN	NaN	NaN	1	NaN	NaN	NaN	1	NaN	NaN	NaN	1
P43025	P43025	Tetranectin	Clec3b	1	1	1	6.9	22257	202	3.88E-05	NaN	NaN	NaN	0	NaN	NaN	NaN	0	NaN	NaN	NaN	0
P43034	P43034	Platelet-activating factor acetylhydrolase IB subunit alpha	PAFAH1B1	1	13	2	32	46637	410	4.06E-57	0.95256	19181	45474	11	11189	21454	40958	11	10764	0.97588	43.71	11
P43155	P43155	Carnitine O-acetyltransferase	CRAT	1	3	2	5.9	70857	626	5.62E-07	NaN	NaN	NaN	0	NaN	NaN	NaN	0	NaN	NaN	NaN	0
P43243	P43243	Matrin-3	MATR3	1	31	6	40.4	94622	847	0	0.54204	0.65529	31962	93	0.50534	0.60639	32716	92	0.90488	0.99535	19.04	93
P43246;P43247	P43246;P43247	DNA mismatch repair protein Msh2	MSH2;Msh2	2	22	22	27	104.74	934	1.44E-89	0.42464	0.80043	30481	14	0.52274	0.89552	35295	14	1231	1.13	32618	14
P43304	P43304	Glycerol-3-phosphate dehydrogenase, mitochondrial	GPD2	1	24	9	40.2	80852	727	2.25E-109	0.77686	10138	26.09	19	0.67743	0.82916	37165	19	0.947	10288	37464	19
Q9CY50;P43307	Q9CY50;P43307	Translocon-associated protein subunit alpha	Ssr1;SSR1	2	2	2	6.6	32065	286	3.30E-07	NaN	NaN	NaN	1	NaN	NaN	NaN	1	NaN	NaN	NaN	1
P43378;O35239	P43378;O35239	Tyrosine-protein phosphatase non-receptor type 9	PTPN9;Ptpn9	2	7	7	15.5	68019	593	2.62E-18	12057	11905	32369	7	10034	14184	40478	7	10744	0.95456	24387	7
P43405	P43405	Tyrosine-protein kinase SYK	SYK	1	7	2	17.2	72065	635	4.14E-40	NaN	NaN	NaN	0	NaN	NaN	NaN	0	NaN	NaN	NaN	0
P43406	P43406	Integrin alpha-V;Integrin alpha-V heavy chain;Integrin alpha-V light chain	Itgav	1	10	3	11.5	115.36	1044	1.13E-29	NaN	NaN	NaN	0	NaN	NaN	NaN	0	NaN	NaN	NaN	0
P43487;P34022;Q9C010	P43487;P34022	Ran-specific GTPase-activating protein	RANBP1;Ranbp1	3	8	8	47.8	23.31	201	1.14E-32	0.75349	13642	28531	11	0.88942	11149	33671	11	0.92733	0.8872	30433	11
P43490	P43490	Nicotinamide phosphoribosyltransferase	NAMPT	1	22	11	52.7	55.52	491	1.39E-232	15543	15139	41664	85	14807	15356	40193	85	0.93914	10112	21573	85
P54775;P43686	P54775;P43686	26S protease regulatory subunit 6B	Psmc4;PSMC4	2	11	11	34.7	47408	418	6.51E-59	0.90828	1083	24745	28	0.84994	0.95812	41884	28	0.9045	0.98533	34.42	28
P43897;Q9CZR8	P43897	Elongation factor Ts, mitochondrial	TSFM	2	12	12	43.7	35.39	325	1.99E-106	0.72053	0.85302	20117	17	0.71135	0.98396	19461	17	10653	11904	14698	17
P45376	P45376	Aldose reductase	Akr1b1	1	11	7	34.8	35732	316	2.20E-47	NaN	NaN	NaN	0	NaN	NaN	NaN	0	NaN	NaN	NaN	0
P45377	P45377	Aldose reductase-related protein 2	Akr1b8	1	2	1	10.4	36.12	316	2.31E-05	NaN	NaN	NaN	0	NaN	NaN	NaN	0	NaN	NaN	NaN	0
Q9Y281;P45591	Q9Y281;P45591	Cofilin-2	CFL2;Cfl2	2	9	6	62	18736	166	4.56E-57	0.89916	18712	10471	5	20272	17125	44352	5	0.80795	0.88053	46853	5
P45700	P45700	Mannosyl-oligosaccharide 1,2-alpha-mannosidase IA	Man1a1	1	2	2	4.3	73275	655	0.0001884	NaN	NaN	NaN	0	NaN	NaN	NaN	0	NaN	NaN	NaN	0
P45880;Q60930	P45880;Q60930	Voltage-dependent anion-selective channel protein 2	VDAC2;Vdac2	2	13	13	60.2	31566	294	1.11E-177	0.61414	0.83354	25709	49	0.62841	0.88673	29928	49	10799	11588	28.5	49
P45952	P45952	Medium-chain specific acyl-CoA dehydrogenase, mitochondrial	Acadm	1	7	3	18.1	46481	421	8.34E-18	NaN	NaN	NaN	0	NaN	NaN	NaN	0	NaN	NaN	NaN	0
P45954	P45954	Short/branched chain specific acyl-CoA dehydrogenase, mitochondrial	ACADSB	1	6	4	17.4	47485	432	5.71E-20	1327	10602	61082	3	1204	11931	86524	3	0.97312	11082	20907	3
P45973;Q61686	P45973;Q61686	Chromobox protein homolog 5	CBX5;Cbx5	2	9	9	46.1	22225	191	1.25E-79	0.81423	0.77012	30296	18	0.76898	0.83117	34972	18	0.89304	0.98709	24636	18
P45974	P45974	Ubiquitin carboxyl-terminal hydrolase 5	USP5	1	24	3	35.2	95785	858	7.63E-151	16019	16102	41448	23	1637	15836	65791	23	0.89837	10356	40.84	23
P45984;Q9WTU6;Q61831;P53779	P45984;Q9WTU6;Q61831;P53779	Mitogen-activated protein kinase 9;Mitogen-activated protein kinase 10	MAPK9;Mapk9;Mapk10;MAPK10	4	5	3	16.7	48139	424	3.51E-13	0.55645	11623	46567	5	0.99137	15394	60318	5	10905	10068	41135	5
P47809;P45985	P47809;P45985	Dual specificity mitogen-activated protein kinase kinase 4	Map2k4;MAP2K4	2	2	2	6.5	44113	397	8.78E-06	0.6509	13782	45603	2	0.98272	18449	30766	2	13094	11749	30776	2
P46013	P46013	Antigen KI-67	MKI67	1	28	27	14.7	358.69	3256	1.48E-87	0.65627	13066	99.49	21	10248	17663	97.52	21	12367	1219	28207	21
P46060	P46060	Ran GTPase-activating protein 1	RANGAP1	1	29	17	52.5	63541	587	2.33E-187	0.69999	0.74327	34013	43	0.69084	0.83824	52326	43	0.96364	10811	40721	43
P46063;Q9Z129	P46063	ATP-dependent DNA helicase Q1	RECQL	2	20	20	33.4	73457	649	1.53E-82	0.99558	0.92632	31.55	37	0.86388	10645	71764	37	0.90916	10223	54957	37
P46087;Q922K7	P46087	Putative ribosomal RNA methyltransferase NOP2	NOP2	2	18	18	27.6	89301	812	1.96E-103	10131	0.67985	48626	13	0.97472	0.67258	60749	13	11915	1218	27503	13
P46100	P46100	Transcriptional regulator ATRX	ATRX	1	13	8	8	282.58	2492	4.99E-45	0.50386	0.76852	18164	11	0.53038	0.7526	25131	11	0.84482	0.8942	31525	11
P46109;P47941	P46109;P47941	Crk-like protein	CRKL;Crkl	2	11	11	44.6	33777	303	8.03E-69	17285	14775	40251	18	15075	13323	52334	18	0.84218	0.9348	34049	18
P46199	P46199	Translation initiation factor IF-2, mitochondrial	MTIF2	1	3	3	5.4	81316	727	5.29E-10	NaN	NaN	NaN	1	NaN	NaN	NaN	1	NaN	NaN	NaN	1
P46379;Q9Z1R2	P46379;Q9Z1R2	Large proline-rich protein BAG6	BAG6;Bag6	2	23	23	27.7	119.41	1132	2.25E-107	12914	11891	26203	26	12938	13549	32632	26	11251	11102	20267	26
P46412;P22352;P21765;O75715	P46412;P22352	Glutathione peroxidase 3	Gpx3;GPX3	4	6	6	32.3	25442	226	4.35E-17	NaN	NaN	NaN	0	NaN	NaN	NaN	0	NaN	NaN	NaN	0
P46459;P46460	P46459;P46460	Vesicle-fusing ATPase	NSF;Nsf	2	25	25	35.5	82593	744	7.87E-86	0.85903	1225	29844	19	0.67453	11754	35062	19	0.80871	0.92238	33118	19
P46467	P46467	Vacuolar protein sorting-associated protein 4B	Vps4b	1	11	3	30.9	49419	444	4.08E-29	0.69727	13888	76233	10	0.71304	12513	64.33	10	0.91755	0.91918	43973	10
P46527;P46414	P46527;P46414	Cyclin-dependent kinase inhibitor 1B	CDKN1B;Cdkn1b	2	2	2	14.1	22073	198	1.88E-05	11953	0.94111	36028	3	12632	11409	19.51	3	0.90903	10376	31718	3
Q15907;P46638;P62492;P62491;Q9WTL2;P57735	Q15907;P46638;P62492;P62491	Ras-related protein Rab-11B;Ras-related protein Rab-11A	RAB11B;Rab11b;Rab11a;RAB11A	6	14	14	66.1	24488	218	2.43E-60	0.68228	11329	57973	29	0.71793	10641	69013	29	0.9754	10102	17037	29
P46734;O09110	P46734;O09110	Dual specificity mitogen-activated protein kinase kinase 3	MAP2K3;Map2k3	2	2	2	7.8	39318	347	1.31E-06	10266	14825	73244	2	16706	19621	38138	3	15721	12579	45316	3
P46736;P46737	P46736;P46737	Lys-63-specific deubiquitinase BRCC36	BRCC3;Brcc3	2	4	4	19.3	36072	316	9.17E-11	NaN	NaN	NaN	1	NaN	NaN	NaN	1	NaN	NaN	NaN	1
P46776	P46776	60S ribosomal protein L27a	RPL27A	1	5	1	28.4	16561	148	3.45E-24	0.55365	0.64472	26748	24	0.47077	0.58351	19094	24	0.8909	0.98292	17736	24
P46777	P46777	60S ribosomal protein L5	RPL5	1	15	2	47.5	34362	297	1.24E-111	0.82691	0.77794	31177	80	0.66621	0.81454	29767	80	0.88105	0.9905	22379	80
P46778	P46778	60S ribosomal protein L21	RPL21	1	7	1	41.9	18565	160	1.30E-51	0.61602	0.52987	34857	30	0.49949	0.55032	42016	30	0.91824	0.9585	21948	30
P46779;P41105	P46779;P41105	60S ribosomal protein L28	RPL28;Rpl28	2	7	7	44.5	15747	137	3.42E-28	0.39351	0.45161	34878	12	0.35393	0.44072	81434	12	0.88259	10272	58898	12
Q6ZWN5;P46781	Q6ZWN5;P46781	40S ribosomal protein S9	Rps9;RPS9	2	17	17	45.9	22591	194	2.78E-50	0.44995	0.56549	33158	64	0.36872	0.50309	37745	64	0.85157	0.90029	27.42	64
P46782;P97461	P46782;P97461	40S ribosomal protein S5;40S ribosomal protein S5, N-terminally processed	RPS5;Rps5	2	10	10	36.3	22876	204	6.96E-64	0.54165	0.69972	31588	42	0.69007	0.85215	39788	42	11168	1191	30051	42
P63325;P46783;Q9NQ39	P63325;P46783	40S ribosomal protein S10	Rps10;RPS10	3	10	9	49.7	18916	165	1.10E-53	0.73062	0.77057	27095	25	0.60785	0.74878	23395	25	0.87857	0.94158	26805	25
P46821	P46821	Microtubule-associated protein 1B;MAP1B heavy chain;MAP1 light chain LC1	MAP1B	1	20	13	14.2	270.63	2468	5.70E-101	19093	21129	34.17	14	16769	19031	30082	14	0.82285	0.94263	20.86	14
P46926;O88958;Q9CRC9	P46926	Glucosamine-6-phosphate isomerase 1	GNPDA1	3	9	6	40.8	32668	289	4.05E-39	0.9442	18605	37386	7	10449	17677	70076	7	0.93764	0.95635	58916	7
P46934	P46934	E3 ubiquitin-protein ligase NEDD4	NEDD4	1	7	3	7.3	149.11	1319	2.07E-15	13183	13614	34554	4	12801	15305	99175	4	0.95472	0.93715	10339	4
P46935	P46935	E3 ubiquitin-protein ligase NEDD4	Nedd4	1	7	4	10.6	102.71	887	4.93E-17	NaN	NaN	NaN	0	NaN	NaN	NaN	0	NaN	NaN	NaN	0
P46937;P46938	P46937	Yorkie homolog	YAP1	2	5	5	12.9	54461	504	4.67E-11	17265	13894	29446	5	14118	10804	30111	5	0.83371	0.86475	22297	5
[truncated: 4,876 more rows]
